# Supplementary material for: Transcriptome Analysis of the Nematodes Caenorhabditis elegans and Litoditis marina in Different Food Environments
Source: MDPI journal article supplement (doi:10.3390/jmse10050580), 2022-04-25
Supplement: s1 [file s1]

Archive with 7 entries (7 files):
- Supplementary Figure.pdf
- Supplementary File S1.xlsx
- Supplementary File S2.xlsx
- Supplementary File S3.xlsx
- Supplementary File S4.xlsx
- Supplementary File S5.xlsx
- Supplementary File S6.xlsx
