# Supplementary material for: Transcriptome Analysis of the Nematodes Caenorhabditis elegans and Litoditis marina in Different Food Environments
Source: MDPI journal article supplement (doi:10.3390/jmse10050580), 2022-04-25
Supplement: s1 [file s1 › Supplementary Figure.pdf]

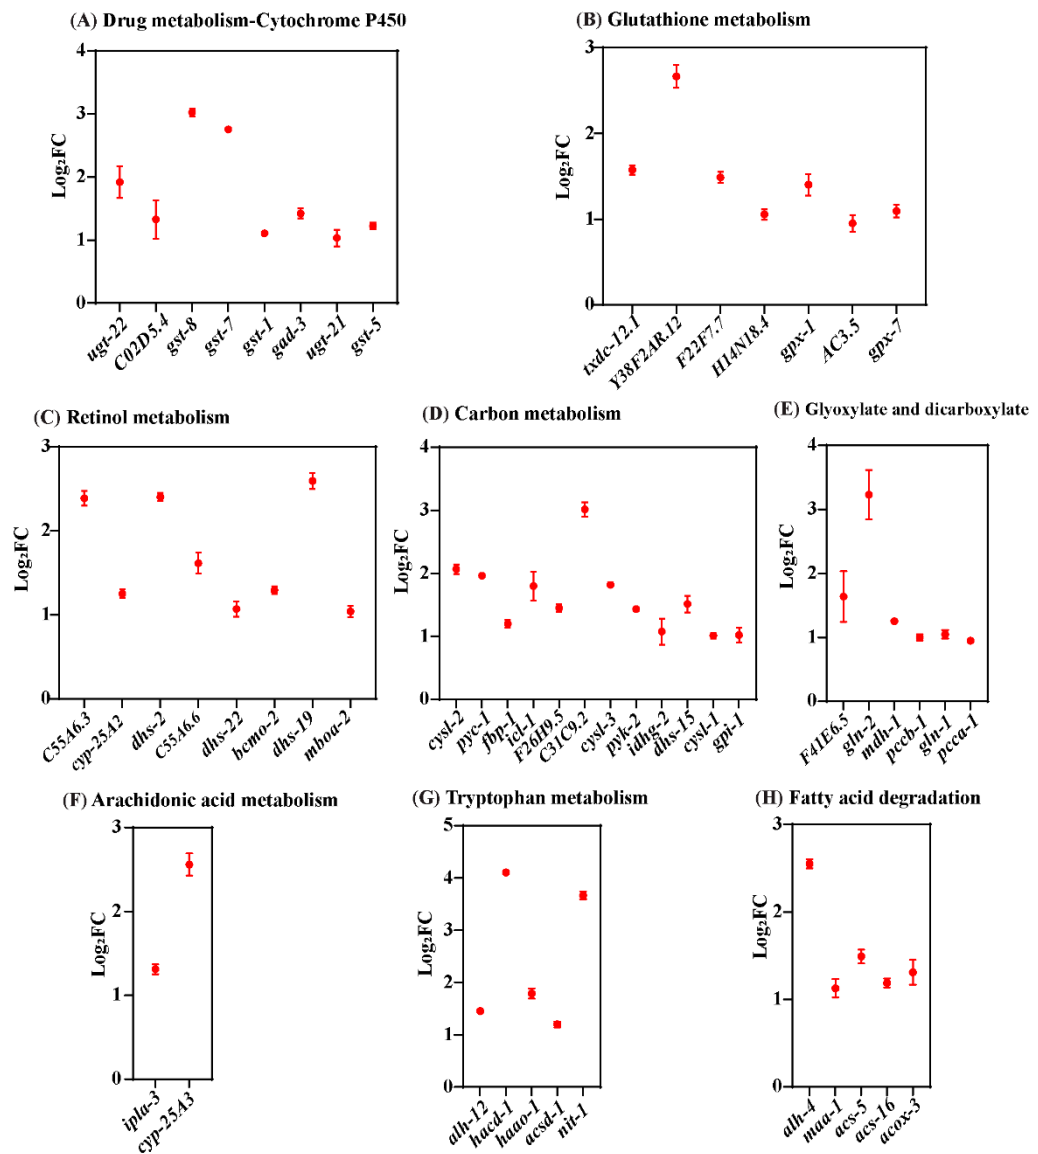

**Supplementary Figure S1.** Shared pathways of *L. marina* and *C. elegans* Under CeMM Conditions. (A) Drug metabolism-cytochrome P450 related genes in *L. marina*. (B) Glutathione metabolism-related genes in *L. marina*. (C) Retinol metabolism genes in *L. marina*. (D) Carbon metabolism genes in *L. marina*. (E) Glyoxylate and dicarboxylate metabolism-related genes in *L. marina*. (F) Arachidonic acid metabolism-related genes in *L. marina*. (G) Tryptophan metabolism-related genes in *L. marina*. (H) Fatty acid degradation-related genes in *L. marina*. Log<sub>2</sub>FC: Log<sub>2</sub>(Fold Change). All data shown here are mean  $\pm$  SEM.

**Supplementary Table S1. Sequencing data statistics**

| <b>Samples</b> | <b>Clean reads</b> | <b>Clean bases</b> | <b>GC Content</b> | <b>%≥Q30</b> |
|----------------|--------------------|--------------------|-------------------|--------------|
| HQ-CeMM1       | 22,709,671         | 6,792,965,608      | 48.58%            | 93.98%       |
| HQ-CeMM2       | 20,506,472         | 6,135,123,172      | 48.55%            | 94.00%       |
| HQ-CeMM3       | 21,905,540         | 6,548,731,716      | 48.39%            | 93.72%       |
| HQ-OP501       | 25,126,485         | 7,511,336,736      | 48.29%            | 93.86%       |
| HQ-OP502       | 21,293,371         | 6,371,918,226      | 47.88%            | 93.54%       |
| HQ-OP503       | 21,630,897         | 6,469,266,624      | 48.16%            | 93.65%       |
| N2-CeMM1       | 21,697,850         | 6,495,321,086      | 46.12%            | 93.16%       |
| N2-CeMM2       | 23,040,034         | 6,892,867,926      | 46.30%            | 93.60%       |
| N2-CeMM3       | 22,586,570         | 6,755,922,018      | 46.50%            | 93.81%       |
| N2-OP501       | 18,867,488         | 5,640,668,092      | 47.06%            | 93.84%       |
| N2-OP502       | 21,592,609         | 6,448,173,608      | 47.26%            | 94.17%       |
| N2-OP503       | 22,608,827         | 6,755,104,724      | 47.17%            | 93.97%       |

Note: (1)Samples: Sample name; 'HQ' and 'N2' represent *L. marina* and *C. elegans*, respectively.

(2)Clean reads: Counts of clean PE reads;

(3)Clean bases: total base number of Clean Data;

(4)GC content: Percentage of G,C in clean data.

(5)≥Q30%: Percentage of bases with Q-score no less than Q30.
