# Supplementary material for: Transcriptome Analysis of the Nematodes Caenorhabditis elegans and Litoditis marina in Different Food Environments
Source: MDPI journal article supplement (doi:10.3390/jmse10050580), 2022-04-25
Supplement: s1 [file s1 › Supplementary File S1.xlsx]

## Sheet: Sheet1
Gene name	primer	sequence(5' > 3')	GC content（%）	TM(Salt adustied)（℃）	amplicon length（bp）
cdc-42 (ref gene)	F	CTGCTGGACAGGAAGATTACG	52	61.2	111
	R	CTCGGACATTCTCGAATGAAG	48	59.5
EVM0013809/cdc-42(ref gene)	F	CCGCTGGACAAGAAGATTACG	52	61.2	149
	R	CTTGGCACAGTGATGAGCTATT	45	60.1
sod-3	F	ATCACTATTGCGGTTCAAGGCTCT	48	62.9	152
	R	AAGTAGTAGGCGTGCTCCCAAAC	52	64.6
acox-3	F	TGCTTTAGTGGACTCGATTGCTC	48	62.9	129
	R	ACCCATCTTGGTTGTTCATTTGTA	38	60.3
gst-4	F	CGTTTTCTATGGAAGTGACGCTGA	46	63.6	102
	R	GCCAGGAACTTATTGATTATTGCC	42	62
eif-6	F	AAGTATTCCGTGTCAGTCTCGCC	52	64.6	112
	R	ATTTCTCGTTGGGTCTCTGGTGG	52	64.6
hsp-1	F	CGAGTCATACGCCTTCAACCTT	50	62.1	142
	R	CTTCTCTGCGGTCTGGTTGCT	57	63.2
EVM0002486/gst-8	F	AATGGGAGGACTGCTGGAGAGAAA	50	65.2	129
	R	CAAATAGCGGAAAATGCTTCTCTG	42	62
EVM0002754/dhs-2	F	CTGGGGTGTATCGGTGCATGTATT	50	65.2	129
	R	CCGTATTCAATCTTAACGTGTTCC	42	62
EVM0005671/ugt-19	F	AGCTGATCAAAGCAGGAACTCTT	43	60.9	118
	R	ATTTAGTATCCGCTCAAAGGCAG	43	60.9
EVM0013887/elo-3	F	TACTATGCCATTCGTGCTGCC	52	61.2	94
	R	CCACTCCCATTACCATCTGCG	57	63.2
