# Supplementary material for: Transcriptome Analysis of the Nematodes Caenorhabditis elegans and Litoditis marina in Different Food Environments
Source: MDPI journal article supplement (doi:10.3390/jmse10050580), 2022-04-25
Supplement: s1 [file s1 › Supplementary File S2.xlsx]

## Sheet: N2_DEG
gene ID	gene name	N2-OP501_Count	N2-OP502_Count	N2-OP503_Count	N2-CeMM1_Count	N2-CeMM2_Count	N2-CeMM3_Count	N2-OP501_FPKM	N2-OP502_FPKM	N2-OP503_FPKM	N2-CeMM1_FPKM	N2-CeMM2_FPKM	N2-CeMM3_FPKM	FDR	log2FC	regulated
WBGene00013871	gnrr-3	32	21	12	52	92	80	0.742479	0.42905	0.232288	1.05582	1.75691	1.54863	0.00993041	1.21061	up
WBGene00008230	pfk-1.2	11	26	8	48	59	64	0.126021	0.263537	0.074628	0.476451	0.552257	0.617359	0.00987017	1.31461	up
WBGene00007765	C27B7.9	0	4	19	102	90	108	0	0.189203	1.04277	6.11258	5.04738	6.16664	0.00939503	1.78305	up
WBGene00016696	srbc-19	24	16	8	52	46	90	0.735052	0.42915	0.190424	1.38435	1.14127	2.29105	0.00918384	1.32722	up
WBGene00019405	K05F1.1	15	23	18	50	74	60	0.273875	0.362079	0.268353	0.807442	1.13292	0.92946	0.00907643	1.19478	up
WBGene00003938	pax-2	31	15	49	87	109	87	0.700035	0.283378	0.918962	2.02803	2.06339	1.77388	0.00891166	1.10557	up
WBGene00001899	his-25	31	35	26	95	87	76	1.37322	1.3953	0.952783	3.75217	3.2507	2.87682	0.00861118	1.0319	up
WBGene00015226	B0507.9	21	9	21	54	81	50	0.67179	0.252505	0.557536	1.53798	2.18789	1.37241	0.00834595	1.28021	up
WBGene00012764	Y41E3.6	8	30	55	80	151	81	0.235992	0.827293	1.45762	2.23213	3.94858	2.14193	0.00833821	1.2451	up
WBGene00017804	-	25	42	22	104	63	101	0.880474	1.32899	0.653714	3.30579	1.87373	3.08872	0.00808535	1.11415	up
WBGene00018684	fbxa-41	44	26	36	97	83	117	1.20003	0.605797	0.801895	2.32043	1.85553	2.67763	0.00794965	1.02959	up
WBGene00009879	F49C12.10	38	23	64	131	116	97	1.15907	0.596583	1.62789	3.49439	2.90397	2.4752	0.00794685	1.02928	up
WBGene00022870	ZK1240.5	31	36	37	50	138	123	0.873352	0.889732	0.877888	1.23394	3.25012	2.95146	0.00789488	1.10334	up
WBGene00044759	T06E6.15	42	28	22	79	70	142	1.46163	0.83695	0.623419	2.41197	2.02099	4.17516	0.00777331	1.14736	up
WBGene00017446	F14B8.4	17	36	40	78	93	95	1.18754	2.20779	2.31276	4.7526	5.34434	5.54253	0.00761486	1.07622	up
WBGene00006628	tsp-2	30	58	36	126	185	61	1.157	1.97159	1.15694	4.26606	5.88855	1.96719	0.0074083	1.11069	up
WBGene00021654	Y47G7B.2	31	13	46	78	128	82	0.56826	0.210982	0.714324	1.26482	1.9481	1.27147	0.00703458	1.18031	up
WBGene00009227	F28G4.2	71	56	89	47	46	26	1.61798	1.11381	1.68903	0.92014	0.846272	0.489073	0.0064995	-1.09194	down
WBGene00012442	Y15E3A.3	28	20	42	101	103	66	0.518886	0.314372	0.652052	1.64131	1.57113	1.01914	0.00637777	1.12128	up
WBGene00001894	his-20	35	29	56	95	112	115	2.60011	1.86469	3.43287	6.15095	6.82067	7.12581	0.00620521	1.00287	up
WBGene00022039	Y65B4BL.7	29	16	23	76	46	118	0.909381	0.495743	0.644201	2.01218	1.11328	3.06944	0.00607195	1.27037	up
WBGene00015705	nhr-152	43	33	27	100	155	65	0.852204	0.576762	0.449013	1.75803	2.55042	1.09316	0.0058647	1.13535	up
WBGene00010791	sodh-2	15	33	22	70	108	56	0.390721	0.73361	0.458448	1.58984	2.29645	1.22115	0.0058156	1.22959	up
WBGene00044457	C18H7.11	23	45	52	119	115	92	0.479769	0.829204	0.926961	2.22107	2.01019	1.6338	0.00579647	1.0265	up
WBGene00001533	gcy-6	60	21	27	111	127	106	0.501126	0.149433	0.18964	0.824461	0.878612	0.750416	0.00571713	1.15151	up
WBGene00021244	Y22D7AL.4	32	23	20	101	52	97	0.638819	0.40327	0.336934	1.79679	0.861241	1.63517	0.00571393	1.21547	up
Caenorhabditis_elegans_newGene_331	-	20	34	13	82	102	53	1.00899	1.54742	0.546019	3.75797	4.38025	2.29653	0.00558291	1.27323	up
Caenorhabditis_elegans_newGene_390	-	19	23	37	78	135	51	1.36844	1.4097	2.20163	4.93013	8.00675	3.08454	0.00537877	1.23619	up
WBGene00015631	clec-89	111	75	87	61	44	60	3.14891	1.86695	2.05152	1.51723	1.01658	1.4115	0.00524765	-1.00568	down
WBGene00010278	F58G6.8	63	14	49	127	114	167	2.93201	0.534542	1.87556	5.13593	4.32897	6.48153	0.00524165	1.18485	up
WBGene00019312	K02E7.7	29	39	32	126	125	56	1.27213	1.48633	1.15035	4.84163	4.51149	2.05609	0.00493783	1.14546	up
WBGene00219274	T25G12.13	44	44	45	17	22	21	1.28149	1.11885	1.09439	0.437974	0.518131	0.508893	0.004912	-1.30293	down
WBGene00007809	C29F4.3	66	26	70	141	159	146	1.55807	0.526973	1.37286	2.90677	3.08112	2.8744	0.00467004	1.02315	up
WBGene00007423	C08B6.2	23	25	18	93	68	60	0.878749	0.84313	0.527372	3.2698	2.18894	1.94504	0.00465134	1.23079	up
WBGene00009401	F35C11.2	21	17	16	67	69	55	0.431562	0.293296	0.268112	1.20191	1.15893	0.933051	0.00464133	1.27971	up
WBGene00012823	Y43F8B.13	72	45	83	27	48	24	2.9938	1.62266	2.87394	0.984058	1.64377	0.810696	0.00463994	-1.21756	down
WBGene00206355	C34C6.10	15	10	30	75	65	61	0.347429	0.204482	0.576848	1.5278	1.23519	1.19196	0.00463663	1.33103	up
WBGene00164985	ZK1010.10	16	29	43	131	73	77	0.656554	1.02736	1.62643	4.61522	2.42461	2.60767	0.00454809	1.21137	up
WBGene00012622	Y38H6C.9	34	27	25	81	122	68	0.883574	0.613742	0.544458	1.87468	2.65231	1.49125	0.0045277	1.16149	up
WBGene00015049	B0218.5	24	12	24	61	83	67	0.505422	0.223068	0.429012	1.13421	1.45436	1.191	0.0045074	1.27745	up
WBGene00001781	gst-33	78	63	34	222	168	113	2.78374	1.96203	1.01027	6.90505	4.89702	3.34686	0.00448072	1.05588	up
WBGene00015036	sre-5	32	23	37	62	109	113	0.727876	0.463924	0.715527	1.25455	2.08298	2.20362	0.00436664	1.15167	up
WBGene00021028	W04C9.6	23	30	30	86	72	91	0.460154	0.516322	0.489111	1.50625	1.17563	1.51825	0.00435881	1.12971	up
WBGene00000563	cng-3	29	66	33	112	198	85	0.406471	0.818345	0.384645	1.38163	2.29997	1.00387	0.00422768	1.15278	up
WBGene00010693	K08H2.7	39	57	52	9	18	32	2.50677	3.18212	2.76628	0.496131	0.910106	1.72911	0.00422696	-1.41171	down
WBGene00013013	clec-145	7	26	23	71	45	103	0.157396	0.590974	0.485603	1.61357	0.951129	2.22469	0.00422584	1.40216	up
WBGene00021987	fbxa-40	40	10	14	103	77	79	0.77272	0.157358	0.223079	1.7325	1.21772	1.28409	0.00416227	1.38491	up
WBGene00007049	tag-191	22	18	32	57	69	120	0.570136	0.400136	0.704994	1.31821	1.49583	2.66572	0.00413801	1.26444	up
WBGene00021086	W08E12.5	50	208	211	76	87	90	3.00986	11.012	10.6215	4.01556	4.30931	4.52464	0.00402434	-1.09701	down
WBGene00011572	mam-5	107	92	118	72	37	78	2.01089	1.33168	1.76805	1.11922	0.522901	1.10588	0.00398938	-1.02444	down
WBGene00020060	srab-16	28	13	30	92	80	69	0.773461	0.309644	0.676112	2.21526	1.80932	1.59074	0.00395707	1.25137	up
WBGene00016556	math-21	29	47	40	106	132	86	0.568556	0.830858	0.663266	1.87025	2.18271	1.44876	0.00395516	1.05129	up
WBGene00043297	F28F5.4	29	45	17	94	114	86	4.12163	5.78316	2.05045	12.0471	13.6442	10.4466	0.00392159	1.19386	up
WBGene00000974	dhs-11	15	12	27	110	45	57	0.556153	0.345856	0.789836	3.30148	1.2647	1.68212	0.00391458	1.40305	up
WBGene00003574	ncx-9	26	16	45	99	139	59	0.332056	0.17912	0.493779	1.13144	1.49449	0.640171	0.00384888	1.26659	up
Caenorhabditis_elegans_newGene_1184	-	20	48	55	130	120	101	0.364845	0.765616	0.831222	2.07825	1.79046	1.53977	0.00370238	1.09358	up
WBGene00044586	Y61A9LA.12	86	51	43	207	170	126	4.09563	2.11622	1.68913	8.58594	6.64652	4.98584	0.00369926	1.02643	up
WBGene00009701	egg-3	21	55	28	97	145	86	0.315779	0.724857	0.348425	1.28207	1.80434	1.09738	0.00369713	1.18342	up
WBGene00011396	nhr-271	28	24	8	75	78	80	0.620336	0.463861	0.149674	1.47406	1.44408	1.5118	0.00360711	1.36132	up
WBGene00043279	F22D6.8	22	28	43	105	97	77	1.42837	1.59288	2.35165	6.02619	5.19915	4.22415	0.0035392	1.14197	up
WBGene00001757	gst-9	27	46	22	83	110	102	1.00101	1.53229	0.676512	2.77556	3.45587	3.2514	0.0035392	1.1603	up
WBGene00017879	acd-4	5	35	31	84	101	83	0.071629	0.452638	0.384024	1.08642	1.22557	1.03257	0.00348807	1.38118	up
WBGene00018795	F54C4.4	26	73	113	168	214	194	1.21092	3.0075	4.44426	6.94601	8.31128	7.66354	0.00347695	1.04931	up
WBGene00020759	T24C4.3	18	36	18	78	72	94	1.03141	1.83234	0.843785	4.03809	3.47017	4.64091	0.00339855	1.25773	up
WBGene00011354	lgc-13	14	22	20	72	56	70	0.311988	0.427405	0.361645	1.4012	1.02435	1.3032	0.00338774	1.30493	up
WBGene00013507	Y71A12B.10	70	134	67	33	10	66	1.89524	3.19534	1.50521	0.784599	0.210414	1.49076	0.0033017	-1.41364	down
WBGene00000989	dhs-26	19	19	22	123	46	61	0.448982	0.381028	0.426721	2.55023	0.88583	1.20891	0.0030452	1.38351	up
WBGene00005657	srr-6	25	45	23	116	83	95	0.554238	0.879777	0.41854	2.26339	1.52569	1.77896	0.0029705	1.18928	up
WBGene00007597	C15A11.2	37	26	20	74	108	94	1.3638	0.823747	0.603894	2.39439	3.29775	2.89069	0.00288802	1.22251	up
WBGene00164973	C39B10.7	41	76	81	103	217	214	1.70638	2.80081	2.83473	3.77394	7.47993	7.49428	0.00286818	1.02318	up
WBGene00206354	F27E5.9	86	218	173	101	52	117	4.60412	10.2516	7.71039	4.72191	2.28288	5.23416	0.00286671	-1.05847	down
WBGene00009129	F25H5.7	29	59	28	88	163	111	0.515593	0.942487	0.411236	1.39253	2.43006	1.69089	0.00286267	1.17095	up
WBGene00019564	K09D9.1	33	45	21	142	76	105	0.924175	1.13038	0.495785	3.56086	1.79573	2.53035	0.00286267	1.21732	up
WBGene00009090	fipr-3	74	90	62	25	35	54	4.83587	5.13767	3.3588	1.4136	1.85525	2.9281	0.00281635	-1.2123	down
WBGene00009073	delm-1	27	18	47	164	60	101	0.38477	0.227902	0.575255	2.10415	0.715146	1.23711	0.00268724	1.32061	up
WBGene00050915	Y6E2A.10	5	11	20	59	65	41	0.156235	0.333278	0.599992	1.84882	1.93525	1.2437	0.00264077	1.55255	up
WBGene00018970	clec-68	130	78	100	45	81	48	2.56471	1.34166	1.64034	0.770158	1.31549	0.788993	0.00261089	-1.10185	down
WBGene00022478	fbxa-35	19	6	8	49	59	56	0.546159	0.135926	0.186935	1.26145	1.42963	1.37967	0.0025321	1.57852	up
WBGene00018406	F44A2.7	40	57	44	18	23	18	1.15267	1.46628	1.06967	0.463122	0.539622	0.428667	0.00246033	-1.39437	down
WBGene00019667	spe-49	32	13	17	86	85	67	0.3576	0.128054	0.162577	0.854329	0.795423	0.641554	0.00244111	1.36716	up
WBGene00007521	C11E4.7	13	15	13	67	51	51	0.260982	0.292367	0.228453	1.26744	0.892021	0.911916	0.00237441	1.45131	up
WBGene00009148	F26D2.3	49	87	106	37	47	42	1.23235	1.55971	1.93173	0.679306	0.884518	0.727617	0.00236543	-1.15968	down
WBGene00009810	srm-6	26	11	6	45	69	100	0.646038	0.223056	0.114596	0.957866	1.39983	2.07088	0.00236118	1.57652	up
WBGene00012592	Y38E10A.14	48	90	77	15	54	19	1.14928	1.90502	1.5461	0.312823	1.06911	0.374749	0.00226356	-1.41618	down
WBGene00194892	dsb-2	43	27	32	111	118	86	1.27097	0.686951	0.771243	2.86295	2.86854	2.10757	0.00225172	1.15637	up
WBGene00001931	his-57	24	20	20	86	76	63	1.54795	1.26077	0.994977	5.17385	4.15504	3.59253	0.00222797	1.29849	up
WBGene00009438	F35G2.5	57	78	123	63	27	29	1.4347	1.73817	2.6081	1.37965	0.603146	0.600029	0.00221156	-1.28153	down
WBGene00044492	Y54G2A.49	12	0	12	62	41	55	0.590117	0	0.505365	2.81212	1.72817	2.37271	0.00218821	1.78366	up
WBGene00005999	srx-108	0	10	17	60	65	41	0	0.255527	0.42172	1.55282	1.56753	0.995268	0.0020793	1.77499	up
WBGene00022573	ZC239.15	116	111	111	96	45	26	3.8424	3.21026	3.07399	2.78445	1.20965	0.696037	0.00205925	-1.23442	down
WBGene00022530	ZC155.2	32	19	43	104	118	81	1.21056	0.630135	1.38098	3.51606	3.74855	2.62264	0.00205312	1.21895	up
WBGene00011266	R13H4.8	78	191	165	54	111	81	3.05098	6.56917	5.39952	1.8545	3.56581	2.65537	0.00203823	-1.07038	down
Caenorhabditis_elegans_newGene_439	-	45	43	18	102	122	126	0.752647	0.719944	0.306702	1.44647	1.57273	1.76303	0.00203281	1.2217	up
WBGene00015100	B0280.2	23	31	43	67	150	100	0.318338	0.36887	0.488267	0.803179	1.69439	1.14753	0.00201679	1.23848	up
WBGene00010311	F59B2.9	50	27	43	126	123	107	0.959711	0.442387	0.685736	2.11431	1.93633	1.71229	0.00199864	1.1173	up
WBGene00001237	elc-2	10	12	11	48	55	47	0.547605	0.571982	0.501523	2.31722	2.52144	2.19704	0.00197377	1.54085	up
WBGene00013383	aptf-2	50	63	30	188	145	102	1.12566	1.23697	0.546101	3.75669	2.69485	1.93997	0.00195765	1.14443	up
WBGene00006627	tsp-1	39	17	24	86	122	79	1.1947	0.438362	0.5905	2.28509	3.05469	2.02222	0.00194233	1.30842	up
WBGene00010752	K10G4.3	76	100	46	278	210	139	3.4185	3.98199	1.73812	11.0039	7.80866	5.26867	0.00189485	1.06049	up
WBGene00018750	F53C3.6	90	43	98	167	320	168	2.84816	1.18985	2.5958	4.64368	8.36421	4.46929	0.00182963	1.06661	up
WBGene00015532	C06E4.3	7	6	71	414	397	323	0.193728	0.135946	1.65315	10.1467	9.12809	7.5705	0.00179102	2.07289	up
WBGene00006179	str-130	13	11	13	43	75	49	0.314288	0.22995	0.272341	0.960438	1.58455	1.06064	0.00178653	1.5348	up
WBGene00044363	F22E5.21	42	20	24	81	95	127	1.66884	0.554428	0.630852	2.95245	3.23788	4.3948	0.00178175	1.29363	up
WBGene00044120	C36B1.13	57	60	39	161	181	105	1.50201	1.39002	0.855525	3.74051	3.95909	2.34298	0.00171158	1.07628	up
WBGene00044112	srm-5	14	15	7	66	44	60	0.33289	0.316619	0.127586	1.42726	0.906043	1.24922	0.00170462	1.57105	up
WBGene00010250	F58D12.3	100	47	50	190	176	199	1.15411	0.47928	0.479881	1.92285	1.68108	1.93314	0.00170398	1.06464	up
WBGene00012892	Y45F10D.14	41	53	57	22	18	23	1.15615	1.29748	1.33852	0.529964	0.412791	0.524213	0.00166406	-1.40264	down
WBGene00020377	T09B4.3	43	49	60	119	125	162	1.59406	1.60535	1.85874	3.98549	3.9172	5.17396	0.00164806	1.01334	up
WBGene00018102	math-28	0	7	0	181	234	139	0	0.067162	0	1.73038	2.09981	1.268	0.00164323	2.13912	up
Caenorhabditis_elegans_newGene_45	-	10	20	25	76	62	73	0.190959	0.343505	0.420537	1.33563	0.994575	1.26668	0.00163293	1.41479	up
WBGene00012595	Y38E10A.17	37	29	10	119	83	99	0.522702	0.360412	0.11239	1.4809	0.970407	1.18533	0.00159823	1.40706	up
WBGene00016049	srt-28	113	93	87	61	42	62	3.20852	2.25804	2.01011	1.48083	0.936206	1.43816	0.0015927	-1.10304	down
WBGene00001883	his-9	52	31	32	116	117	121	3.4656	1.79432	1.78561	6.80499	6.47522	6.83185	0.00157086	1.15488	up
WBGene00007573	C14B1.2	95	118	103	29	57	80	3.41928	3.72414	3.08871	0.891613	1.67523	2.40694	0.00151133	-1.17614	down
WBGene00003683	nhr-93	20	53	26	100	107	122	0.440733	1.02075	0.482307	1.99238	1.95885	2.33594	0.00149075	1.26135	up
WBGene00010136	F55H12.5	43	20	7	83	106	131	1.19072	0.482741	0.157247	2.00883	2.40105	3.02773	0.00139128	1.52731	up
WBGene00009637	nspc-13	20	54	27	98	105	136	1.21482	2.91801	1.34621	5.28639	5.32638	7.03015	0.00137901	1.27439	up
WBGene00009236	F28H7.2	37	41	37	139	157	71	1.19515	1.15509	0.989525	3.91907	4.1825	1.90246	0.00134265	1.20974	up
WBGene00006376	syp-2	17	26	44	89	82	126	0.504074	0.687482	1.13319	2.40454	2.06752	3.25066	0.00133748	1.30663	up
WBGene00016212	C29F5.3	29	25	64	147	142	91	0.725576	0.548553	1.35548	3.25236	2.96122	1.91407	0.00132842	1.24147	up
WBGene00077573	T08G5.15	46	42	32	129	153	89	1.74119	1.40542	1.00559	4.2791	4.78745	2.82386	0.00132683	1.1659	up
WBGene00019754	M03E7.2	98	137	117	51	75	85	4.85528	5.92954	4.83013	2.18787	3.05628	3.52469	0.00131639	-1.02168	down
WBGene00018056	F35F10.6	64	40	72	28	28	10	2.18391	1.18212	2.0156	0.831119	0.767987	0.281333	0.00123924	-1.51966	down
Caenorhabditis_elegans_newGene_1218	-	4	17	10	49	41	77	0.054645	0.202812	0.112589	0.581772	0.457516	0.877561	0.00123765	1.7074	up
WBGene00164968	K08H2.10	70	103	106	40	44	65	1.88551	2.45068	2.40391	0.942673	0.965812	1.462	0.00120232	-1.14957	down
WBGene00021965	Y57G7A.1	111	60	68	174	211	272	6.83286	3.17223	3.498	9.40163	10.6997	14.0448	0.00118778	1.02349	up
WBGene00001939	his-65	15	20	17	73	67	63	0.784767	0.915371	0.740368	3.48109	3.01506	2.87753	0.00118229	1.42604	up
WBGene00013250	Y57A10A.5	20	6	22	76	69	69	0.270415	0.06573	0.246652	0.92749	0.78321	0.800599	0.00118007	1.54476	up
WBGene00017823	pals-34	5	24	13	48	93	65	0.169605	0.758927	0.384342	1.54584	2.81795	1.99241	0.00113484	1.63641	up
WBGene00045494	ZK662.6	68	57	93	42	36	21	2.44268	1.79401	2.77937	1.31586	1.06414	0.624349	0.00111434	-1.33083	down
WBGene00003542	nas-23	95	252	191	102	132	76	1.50712	3.5162	2.52578	1.40995	1.7181	1.00516	0.00110472	-1.05755	down
WBGene00008912	F17C8.7	83	53	48	33	21	21	2.37459	1.31405	1.14001	0.823382	0.489395	0.497295	0.00105503	-1.46049	down
WBGene00009841	fbxa-134	6	15	6	47	54	49	0.153603	0.37571	0.137711	1.19493	1.29702	1.19868	0.00101511	1.72886	up
WBGene00018456	fbxc-39	7	27	14	60	84	72	0.129949	0.457148	0.259146	1.12842	1.39677	1.22719	0.00098981	1.56908	up
Caenorhabditis_elegans_newGene_169	-	14	23	23	67	67	95	0.241496	0.353177	0.348122	1.05981	0.997204	1.445	0.00098981	1.41598	up
WBGene00000031	abu-8	922	2040	2218	900	1010	1047	16.813	32.6161	33.6947	14.3081	15.0892	15.9514	0.000989449	-1.06086	down
WBGene00005083	srd-5	15	8	20	72	50	73	0.403337	0.179009	0.453958	1.73669	1.13482	1.68301	0.000978348	1.57311	up
WBGene00018859	F55A4.7	33	50	79	135	156	163	1.60392	2.15693	3.25952	5.82515	6.33625	6.76069	0.000962893	1.08925	up
WBGene00000797	crn-4	20	9	16	57	62	84	0.464996	0.187114	0.308098	1.17496	1.19699	1.66978	0.000924593	1.55733	up
WBGene00015339	C02E7.6	720	1773	1713	517	732	808	61.7473	133.231	122.314	38.6268	51.4428	57.8706	0.000922571	-1.24143	down
WBGene00077539	Y52B11A.12	10	25	11	46	71	100	0.255066	0.55576	0.227789	1.02951	1.51055	2.15826	0.000917118	1.6061	up
WBGene00022891	ZK1290.10	16	36	10	118	79	73	0.306442	0.596959	0.146896	1.96743	1.23923	1.16132	0.000891426	1.53377	up
WBGene00012163	VZK822L.2	41	52	63	25	20	14	2.87651	3.20079	3.62447	1.54127	1.08907	0.794245	0.000862428	-1.51329	down
WBGene00019982	srbc-58	3	16	22	63	56	89	0.094764	0.441911	0.559303	1.7365	1.44701	2.33753	0.000839043	1.6935	up
WBGene00022452	Y110A2AR.1	105	101	164	53	87	73	2.68227	2.271	3.4995	1.16478	1.82143	1.55218	0.000829022	-1.06917	down
WBGene00007097	B0024.4	47	22	8	309	337	127	1.05828	0.427087	0.146931	6.07752	6.22457	2.38299	0.000808492	2.0563	up
WBGene00022843	ZK1055.2	32	8	52	116	119	135	0.719577	0.159824	0.99368	2.32736	2.24143	2.59068	0.000799186	1.47297	up
WBGene00001891	his-17	16	7	19	71	85	46	0.803455	0.30867	0.801196	3.18607	3.5855	1.98243	0.000788003	1.62509	up
WBGene00020035	egg-5	60	57	43	192	160	116	0.700936	0.578215	0.419216	1.96552	1.53581	1.1358	0.000781712	1.11272	up
WBGene00007818	C30F2.4	59	88	72	35	30	39	7.64937	10.0455	7.82127	3.93311	3.148	4.16598	0.000774002	-1.29135	down
WBGene00019518	K08B5.1	56	83	41	117	187	254	1.13178	1.47942	0.680836	2.07021	3.12124	4.32545	0.000766715	1.18135	up
WBGene00012605	Y38F1A.1	12	17	26	76	78	66	0.329123	0.404838	0.598535	1.83636	1.77917	1.53053	0.000755794	1.47313	up
WBGene00194855	Y75B8A.44	167	160	108	90	68	100	12.126	10.2001	6.52757	5.67035	4.01276	6.07058	0.0007478	-1.0542	down
WBGene00019029	F58B6.1	101	156	140	101	71	56	2.7155	3.66495	3.12424	2.35381	1.55321	1.23981	0.000740172	-1.07054	down
WBGene00019899	R05G6.5	29	42	51	87	143	150	1.23823	1.60542	1.82193	3.30345	5.08818	5.46718	0.000739916	1.20494	up
WBGene00012028	srz-99	11	9	17	78	55	47	0.294412	0.209714	0.381684	1.91944	1.26405	1.11159	0.000715344	1.64745	up
WBGene00001925	his-51	51	57	52	151	145	137	3.61929	3.60411	3.07904	9.50442	8.559	8.22597	0.00070104	1.02935	up
WBGene00013252	Y57A10A.7	38	18	19	82	120	94	0.46911	0.190061	0.1895	0.891883	1.2218	0.979048	0.000682882	1.42677	up
WBGene00012778	Y42A5A.3	14	52	95	317	296	365	0.855611	2.8939	5.01935	17.691	15.5378	19.4724	0.000674919	1.8455	up
WBGene00019577	lido-6	41	54	49	19	14	19	1.00463	1.1447	0.994496	0.393519	0.264399	0.374914	0.000673997	-1.56796	down
WBGene00000634	col-58	177	357	441	287	137	152	4.94206	8.72734	10.2591	6.97916	3.11732	3.53984	0.000653649	-1.01636	down
WBGene00003768	nlp-30	49	62	79	138	164	208	1.89709	2.10805	2.55737	4.67472	5.21919	6.75491	0.000629694	1.03146	up
Caenorhabditis_elegans_newGene_1623	-	80	54	23	223	174	156	1.07772	0.600332	0.237566	2.46778	1.82779	1.67535	0.000625655	1.30474	up
WBGene00010926	M153.3	72	61	81	44	19	26	2.49274	1.83119	2.33978	1.32474	0.531396	0.745761	0.000620799	-1.43497	down
WBGene00019563	K09C6.9	87	95	97	49	20	57	3.64642	3.50224	3.38768	1.79941	0.687827	1.97098	0.000608743	-1.34898	down
WBGene00271414	T05A7.12	68	67	58	129	213	189	2.36706	2.03661	1.68887	3.93363	6.11881	5.52048	0.000602599	1.04182	up
WBGene00015041	cyp-34A6	22	37	51	124	96	137	0.366914	0.539516	0.719391	1.91703	1.38107	1.96471	0.000602149	1.26504	up
WBGene00022548	ZC196.4	24	44	13	117	114	91	0.36661	0.592129	0.166574	1.59529	1.4604	1.18367	0.000584039	1.45285	up
Caenorhabditis_elegans_newGene_1696	-	28	38	7	149	135	65	0.491159	0.481265	0.074234	2.10317	1.62963	0.800079	0.000583784	1.6161	up
WBGene00016367	nhr-162	56	69	52	190	192	120	1.339	1.45242	1.03074	3.9792	3.77552	2.41247	0.000570224	1.08502	up
Caenorhabditis_elegans_newGene_307	-	17	11	7	60	54	70	0.203955	0.105813	0.069271	0.62445	0.532762	0.700012	0.000554581	1.69942	up
WBGene00021435	Y39A3A.4	27	2	5	58	72	123	0.739083	0.03228	0.11417	1.39134	1.63727	2.8579	0.000545517	1.92785	up
WBGene00015102	cpg-2	6	25	28	92	76	89	0.094953	0.339999	0.368027	1.27818	0.994778	1.18409	0.000531317	1.57575	up
WBGene00018291	fip-4	0	18	8	71	63	54	0	1.28	0.507826	5.13575	4.232	3.72165	0.000524422	1.95829	up
WBGene00022339	Y82E9BR.6	31	38	27	103	102	112	6.08326	6.54242	4.37663	17.6849	16.4729	18.3716	0.000520686	1.26301	up
WBGene00001530	gcy-3	59	51	119	261	223	164	0.476789	0.362289	0.798915	1.849	1.48066	1.11215	0.000506092	1.10609	up
WBGene00018828	sdz-21	65	101	77	31	20	51	1.55761	2.12485	1.53951	0.649311	0.387449	1.0083	0.000500963	-1.42856	down
WBGene00006925	vit-1	45	54	75	7	24	26	0.245788	0.255155	0.338698	0.028872	0.104655	0.118193	0.000499455	-1.66294	down
WBGene00015397	nhr-149	21	41	33	116	83	129	0.468153	0.816618	0.621217	2.31274	1.54604	2.53536	0.000498394	1.32803	up
WBGene00013198	Y54E5A.2	82	118	54	208	217	284	1.20371	1.51926	0.65544	2.66765	2.61836	3.48418	0.000484601	1.06202	up
WBGene00021741	Y50D4B.2	12	22	31	63	101	98	0.440203	0.723209	0.960121	2.06472	3.16965	3.10921	0.000471592	1.49416	up
Caenorhabditis_elegans_newGene_118	-	57	53	39	242	81	205	2.50628	2.05925	1.43173	9.39489	2.93887	7.60959	0.000467612	1.34149	up
WBGene00044641	T01D1.8	69	152	129	70	62	45	2.80531	5.47332	4.43333	2.51557	2.08527	1.54818	0.000465083	-1.2189	down
WBGene00008212	C49F5.8	73	76	44	34	22	15	2.15207	1.97853	1.08687	0.872254	0.532837	0.358553	0.000459184	-1.57695	down
WBGene00021136	W10G11.3	6	11	0	45	49	55	0.206954	0.353787	0	1.54311	1.54968	1.80502	0.000430634	2.05241	up
WBGene00004177	pqn-98	14	21	30	96	74	84	0.789442	1.02063	1.42034	4.83384	3.49954	4.02614	0.000419562	1.46634	up
Caenorhabditis_elegans_newGene_566	-	13	15	21	69	126	43	0.236189	0.244256	0.337328	1.22571	2.06692	0.703191	0.000417258	1.66052	up
WBGene00016421	cdc-7	135	129	222	112	84	97	2.55654	2.15204	3.51431	1.85665	1.30012	1.53394	0.000415543	-1.01127	down
WBGene00020151	T01G6.1	43	80	63	149	205	164	1.40054	2.30831	1.72006	4.29228	5.5546	4.52853	0.000414467	1.07566	up
WBGene00017083	kin-33	58	16	15	126	130	151	1.38477	0.262663	0.238366	2.55397	2.27687	2.73856	0.00041412	1.56761	up
WBGene00009490	fbxa-99	44	26	35	133	121	101	1.22084	0.612258	0.808138	3.20773	2.74686	2.34483	0.000411712	1.28681	up
WBGene00269378	C07G3.15	74	78	57	35	31	23	2.30997	2.17188	1.49241	0.981592	0.770403	0.603321	0.00038511	-1.43315	down
Caenorhabditis_elegans_newGene_242	-	63	78	58	166	188	175	1.17601	1.18792	0.870027	2.48676	3.02239	2.84254	0.000385031	1.00862	up
Caenorhabditis_elegans_newGene_548	-	18	43	45	152	157	78	0.313521	0.988965	0.676419	2.37441	2.29978	1.22851	0.000375908	1.3987	up
WBGene00010566	K04G2.7	100	157	207	77	105	89	3.05127	4.09756	5.23837	2.47845	2.56614	2.21216	0.000369107	-1.0489	down
WBGene00019242	srbc-40	36	24	41	163	127	77	1.07314	0.859779	1.08731	4.72177	3.21619	2.01622	0.000368743	1.37787	up
WBGene00001895	his-21	55	62	58	160	167	147	3.96971	3.88459	3.45613	10.0441	9.87893	8.83723	0.000368561	1.03545	up
WBGene00017570	F18E9.4	141	167	142	106	100	64	3.93898	4.10815	3.30435	2.59559	2.29316	1.49657	0.000359155	-1.03518	down
WBGene00002051	ifa-3	88	98	115	56	58	50	1.21711	1.19392	1.33822	0.676525	0.66	0.582734	0.0003582	-1.14561	down
WBGene00206464	F59C6.18	10	25	15	73	112	54	0.639438	1.515	0.859809	4.40553	6.39213	3.12467	0.000332783	1.6542	up
WBGene00013608	clec-35	116	164	176	37	51	123	2.99578	3.69352	3.79433	0.828005	1.06734	2.65933	0.000329011	-1.3286	down
WBGene00001777	gst-29	19	28	10	115	59	95	0.730538	0.975214	0.313036	4.00413	1.90001	3.16286	0.000310725	1.63672	up
WBGene00010354	cyp-31A2	30	43	46	130	102	146	0.50612	0.650918	0.65572	1.94857	1.43693	2.10204	0.000301931	1.24018	up
WBGene00044742	Y55F3BR.10	27	40	38	116	165	84	0.827536	1.06298	0.976122	3.12239	4.17726	2.16446	0.000298341	1.33477	up
WBGene00002270	lec-7	99	44	24	321	430	464	4.33869	1.64064	0.847937	12.3027	15.5229	16.9817	0.000294878	1.95738	up
WBGene00044205	T13F3.8	11	10	15	70	52	61	0.383425	0.320062	0.440796	2.26256	1.58631	1.90014	0.00029449	1.71468	up
WBGene00022123	Y71F9AR.2	137	91	138	50	82	63	4.82008	2.8064	4.04029	1.51978	2.36022	1.84482	0.000286423	-1.18725	down
WBGene00018233	F40E3.6	22	8	5	87	87	48	0.77529	0.246399	0.145131	2.69223	2.5491	1.41522	0.000285475	1.86249	up
WBGene00012731	Y39G8C.2	22	28	17	87	80	100	0.606228	0.67172	0.395113	2.11156	1.83402	2.32689	0.000280728	1.47481	up
WBGene00022802	ZK688.7	19	79	95	235	210	202	1.02752	3.78077	4.29286	11.2139	9.40572	9.18917	0.000272905	1.32615	up
WBGene00016281	pals-32	15	0	13	395	540	235	0.348088	0	0.247054	8.23954	10.5888	4.69046	0.000247566	2.46319	up
WBGene00002093	ins-10	44	49	50	153	122	149	3.10735	3.06601	2.9556	9.55796	7.15185	8.90317	0.00024138	1.15336	up
WBGene00012961	Y47H10A.5	56	80	64	154	244	166	1.43134	1.80786	1.3762	3.46956	5.1728	3.58647	0.000239119	1.08745	up
WBGene00003713	nhr-123	97	60	89	214	218	223	2.01251	1.07841	1.52273	3.8687	3.70491	3.85724	0.000232078	1.01057	up
WBGene00012952	Y47H9C.9	83	97	134	54	55	55	0.898	0.921366	1.21569	0.509118	0.491253	0.496509	0.000229427	-1.19356	down
WBGene00006539	tbb-6	10	38	29	98	113	104	0.190865	0.665388	0.48186	1.69552	1.84452	1.7365	0.000228202	1.52711	up
WBGene00012729	Y39G8B.10	42	82	51	26	14	17	1.94231	3.34764	1.98154	1.05707	0.514189	0.643498	0.00022552	-1.69287	down
WBGene00020420	T10E10.3	41	41	57	148	130	138	0.930929	0.80897	1.08718	2.95582	2.43801	2.64427	0.000225371	1.16908	up
WBGene00050957	C10A4.10	46	15	36	122	161	105	1.37232	0.383675	0.888777	3.22693	4.01835	2.65029	0.000225319	1.47224	up
WBGene00020448	fbxa-51	27	12	42	95	157	92	0.683652	0.246758	0.88361	2.0931	3.26103	1.94069	0.000221494	1.55251	up
Caenorhabditis_elegans_newGene_339	-	79	81	94	26	56	24	2.67527	2.3835	2.67241	0.767346	1.77072	0.67728	0.000219633	-1.46089	down
WBGene00008271	suex-2	31	41	43	96	180	115	0.528849	0.615559	0.620371	1.46268	2.57047	1.67206	0.000219532	1.31245	up
Caenorhabditis_elegans_newGene_1140	-	94	48	124	215	293	256	6.23287	2.76938	6.83782	12.43	15.9158	14.1337	0.000208824	1.11417	up
WBGene00010737	K10C8.4	38	43	54	152	136	122	2.04154	2.00216	2.33927	6.87778	6.02076	5.51597	0.000206159	1.18776	up
WBGene00006388	taf-7.1	67	47	26	182	165	149	2.02302	1.23969	0.639257	4.84291	4.14205	3.80348	0.000199134	1.33412	up
WBGene00045356	T03E6.9	9	15	19	81	64	64	0.190839	0.299263	0.366145	1.65413	1.23648	1.2538	0.000188419	1.6958	up
WBGene00007117	spe-42	38	38	54	0	5	16	0.452921	0.391013	0.535662	0	0.047044	0.15016	0.000188293	-2.19135	down
WBGene00010859	M04C9.4	180	200	221	110	87	167	3.43189	3.356	3.52034	1.83713	1.35996	2.66953	0.000183107	-1.01925	down
WBGene00044663	F26G1.10	83	64	99	189	238	219	4.96614	3.35736	4.92609	9.90126	11.7462	11.0194	0.000171443	1.00194	up
WBGene00010118	F55F3.4	39	56	75	15	14	25	0.387153	0.490665	0.626769	0.12356	0.108367	0.208685	0.000168683	-1.71727	down
WBGene00012265	W04G5.4	39	41	25	95	111	204	0.658994	0.611267	0.356649	1.43367	1.57366	2.94638	0.000167679	1.45721	up
WBGene00001893	his-19	59	62	60	181	158	165	4.23262	3.93251	3.55686	11.3696	9.35883	9.94669	0.000166757	1.07548	up
WBGene00022255	tmed-13	26	15	31	103	108	82	0.791476	0.401013	0.785823	2.81234	2.75366	2.12192	0.000156687	1.51221	up
WBGene00013244	Y56A3A.33	53	88	31	146	245	208	1.3068	1.93273	0.646645	3.18432	5.02916	4.35415	0.000156558	1.32987	up
WBGene00194695	B0462.5	24	13	44	126	90	123	0.999873	0.461128	1.52043	4.62888	3.10866	4.30723	0.000155054	1.55608	up
WBGene00044280	W02A2.9	44	59	51	144	155	152	5.53629	6.51925	5.30873	15.8446	16.0329	16.0069	0.000153976	1.1407	up
WBGene00045357	F13A7.14	180	129	139	105	70	69	4.39354	2.74279	2.82444	2.22611	1.39364	1.39304	0.000149952	-1.16852	down
WBGene00016915	C54D2.1	90	199	192	96	75	83	2.12036	4.13868	3.80763	1.99498	1.44644	1.65047	0.000142731	-1.17488	down
WBGene00000734	col-161	838	2016	1822	802	763	800	24.8564	52.3874	44.9873	20.7348	18.5413	19.805	0.000142267	-1.22587	down
WBGene00044801	ZC262.9	33	31	51	124	125	130	1.73354	1.38953	2.22425	5.68133	5.36305	5.68948	0.000138574	1.28932	up
WBGene00002012	hsp-12.3	50	30	25	141	125	127	2.07161	1.08563	0.840957	5.12592	4.25398	4.42614	0.00013604	1.40546	up
WBGene00005172	srg-15	24	22	21	110	84	81	0.680292	0.542495	0.485546	2.76282	1.97591	1.94214	0.000134647	1.52086	up
WBGene00011255	R12H7.4	37	11	19	67	167	113	0.738018	0.195777	0.319226	1.1814	2.79555	1.92674	0.000133736	1.72469	up
WBGene00050885	Y94H6A.12	223	338	215	180	99	180	14.1226	18.8355	11.3241	9.9084	5.0731	9.50214	0.000133318	-1.05393	down
WBGene00007709	clec-87	53	46	31	197	113	151	1.63948	1.25236	0.796257	5.33611	2.87474	3.89494	0.0001327	1.35438	up
WBGene00017420	F13B9.2	105	207	251	103	114	98	3.88535	6.75338	7.79445	3.32722	3.45797	3.04255	0.000131245	-1.10383	down
WBGene00010684	K08F9.1	7	17	22	57	102	77	0.331197	0.273654	0.32656	0.970256	1.52109	1.17374	0.000131098	1.75711	up
WBGene00018988	F56F11.1	31	26	46	146	135	91	2.41634	1.76425	3.01329	10.1605	8.7902	6.0263	0.000129637	1.3933	up
WBGene00010831	M02G9.2	109	229	282	114	114	118	2.17193	4.0156	4.6971	1.98543	1.87059	1.97622	0.000128682	-1.10384	down
WBGene00271818	K05F1.14	29	18	69	241	163	94	1.08838	0.597559	2.20539	8.07072	5.10124	3.0034	0.000127518	1.59413	up
WBGene00007550	C13C4.6	111	85	88	320	270	192	1.78096	1.19457	1.16976	4.49127	3.56077	2.58087	0.000127361	1.05365	up
WBGene00020652	egg-4	56	15	20	142	159	125	0.6496	0.152943	0.189928	1.4498	1.53035	1.22191	0.000122021	1.62556	up
Caenorhabditis_elegans_newGene_1336	-	44	44	28	198	118	114	1.27166	1.23549	0.543476	4.38315	2.43288	2.43165	0.00011783	1.40826	up
WBGene00001507	fut-4	23	19	31	102	96	90	0.539269	0.396417	0.613796	2.1234	1.86926	1.78511	0.000114697	1.48935	up
WBGene00020358	math-39	104	76	151	335	254	279	2.90328	1.84747	3.5072	8.14821	5.79405	6.50404	0.000113835	1.01255	up
WBGene00001887	his-13	45	35	38	124	137	130	3.00645	2.02513	2.11313	7.29982	7.54796	7.29627	0.000113418	1.28132	up
WBGene00007509	C10C5.5	20	0	9	798	700	583	0.459439	0	0.174079	16.2074	13.3473	11.3292	0.000111274	2.59761	up
WBGene00007274	C03C11.1	4	5	15	50	55	64	0.147551	0.156306	0.486685	1.70073	1.77468	2.09753	0.000109814	2.02475	up
WBGene00018050	clec-139	21	31	47	117	107	134	0.690883	0.910559	1.30004	3.41595	2.9484	3.75594	0.000108867	1.40761	up
WBGene00007469	chil-4	14	27	11	66	91	102	0.231852	0.415368	0.162262	1.01252	1.31592	1.50619	0.000102513	1.71856	up
WBGene00020684	T22D1.5	30	27	24	113	108	91	0.603209	0.475482	0.398408	2.02089	1.81288	1.56161	9.85123e-05	1.45436	up
WBGene00016488	C36C9.5	113	47	67	257	231	240	2.14588	0.773523	1.05915	4.2746	3.60355	3.81834	9.83483e-05	1.22979	up
WBGene00006718	ubc-23	73	101	95	159	338	276	1.68335	2.05763	1.8342	3.21077	6.43988	5.35704	9.63427e-05	1.11882	up
WBGene00021581	clec-70	19	15	28	82	95	90	0.358599	0.252321	0.447454	1.41117	1.53037	1.49042	9.20744e-05	1.58598	up
WBGene00019472	cyp-35B1	11	9	0	148	170	223	0.184183	0.126591	0	2.17122	2.35264	3.13885	9.19186e-05	2.55424	up
WBGene00044607	K02A11.4	102	96	107	51	58	26	6.29058	5.18463	5.49574	2.71624	2.92875	1.33163	9.113e-05	-1.4099	down
Caenorhabditis_elegans_newGene_375	-	63	79	100	226	183	240	0.808658	0.704983	0.995552	2.5911	1.62071	2.13886	8.97153e-05	1.04474	up
WBGene00002034	htp-3	91	73	64	247	229	180	1.07302	0.757363	0.628248	2.54924	2.21667	1.77725	8.89612e-05	1.10785	up
WBGene00001780	gst-32	13	0	6	174	191	188	0.529936	0	0.190174	6.58093	6.78416	6.82556	8.43281e-05	2.57592	up
WBGene00008695	F11C3.1	58	50	58	137	198	167	1.13838	0.867654	0.956054	2.37173	3.21931	2.7655	8.4096e-05	1.17676	up
WBGene00206525	R74.10	177	311	202	92	181	117	12.7995	19.7383	12.1482	5.81069	10.731	7.07739	8.39138e-05	-1.11872	down
WBGene00017868	slc-28.2	31	69	49	146	167	170	0.454902	0.885979	0.596258	1.90951	2.04675	2.1309	8.08442e-05	1.27574	up
WBGene00001765	gst-17	95	102	78	51	19	35	3.81942	3.60107	2.60468	1.76404	0.604645	1.15772	8.00977e-05	-1.57009	down
Caenorhabditis_elegans_newGene_755	-	205	70	116	393	430	390	3.82501	1.10419	1.79902	6.37578	6.55117	6.07654	7.9682e-05	1.18477	up
WBGene00015747	C13G5.2	77	62	136	210	293	277	1.92044	1.32175	2.83576	4.57273	5.96073	5.7564	7.90077e-05	1.11542	up
WBGene00012413	Y7A5A.7	17	5	14	86	67	65	0.409358	0.103461	0.279829	1.79343	1.31506	1.29667	7.53832e-05	1.8983	up
WBGene00003766	nlp-28	40	34	37	151	115	120	3.31015	2.44061	2.55901	11.0471	7.89816	8.36036	7.43356e-05	1.34713	up
WBGene00012101	zip-10	141	139	88	51	74	51	6.04831	5.22955	3.15102	1.8998	2.59306	1.82706	7.43356e-05	-1.33761	down
WBGene00021397	Y38C1AA.6	26	95	81	253	213	210	0.568413	1.85842	1.50541	4.91858	3.90046	3.90379	7.31004e-05	1.33048	up
WBGene00019376	lipl-4	53	12	10	174	122	146	1.19449	0.219716	0.169834	3.32124	2.15866	2.71791	7.02501e-05	1.84724	up
WBGene00015622	C09B8.3	180	156	166	117	87	92	3.49527	2.66205	2.68971	1.98347	1.38037	1.49701	6.95247e-05	-1.06877	down
WBGene00002097	ins-14	112	126	70	45	48	43	7.01962	6.9238	3.66751	2.42989	2.47444	2.21491	6.81086e-05	-1.42605	down
WBGene00021610	nhr-237	89	58	82	235	228	190	2.36789	1.34323	1.83092	5.46488	4.9855	4.23104	6.66212e-05	1.10428	up
WBGene00008662	F10G8.2	22	19	29	91	100	97	0.710789	0.549475	0.806569	2.65939	2.73917	2.68903	6.04415e-05	1.5432	up
WBGene00021667	snpc-3.2	17	15	12	61	98	73	0.325622	0.248556	0.185189	1.01979	1.54899	1.17989	5.97698e-05	1.77854	up
WBGene00020878	T28A11.16	189	185	183	122	122	60	6.96307	5.98762	5.61337	3.92468	3.67239	1.829	5.96986e-05	-1.16764	down
WBGene00008886	F16C3.2	96	70	98	197	224	364	2.34253	1.49804	1.97854	4.20136	4.47987	7.4149	5.72202e-05	1.16114	up
WBGene00009836	fbxa-185	154	76	132	294	424	310	2.46203	1.06613	1.75536	4.1084	5.56258	4.13443	5.44106e-05	1.09203	up
WBGene00003403	mps-1	114	87	89	258	228	301	3.21412	2.14843	2.10287	6.38422	5.28446	7.13395	5.37459e-05	1.04001	up
WBGene00021919	cutl-25	66	78	95	13	44	22	1.58235	1.6252	1.88796	0.268802	0.859597	0.423799	5.37179e-05	-1.72273	down
WBGene00194905	Y53F4B.51	55	49	42	145	164	159	3.03612	2.35725	1.93243	7.0561	7.48729	7.41409	5.34944e-05	1.24667	up
WBGene00077525	C41G7.8	55	51	112	246	224	193	3.22119	2.58467	5.43455	12.5613	10.757	9.40364	5.34513e-05	1.21107	up
WBGene00044058	F17B5.6	64	128	95	28	45	43	1.44826	2.55945	1.81335	0.548282	0.841327	0.821984	5.09434e-05	-1.508	down
WBGene00012268	W04G5.8	43	20	52	147	138	150	0.91578	0.371091	0.923781	2.77153	2.452	2.71439	4.78242e-05	1.45213	up
WBGene00018724	F53A9.1	81	100	72	209	332	200	6.92631	7.55168	5.13097	15.6808	23.4605	14.417	4.66356e-05	1.13771	up
WBGene00009902	drd-1	94	142	139	56	58	75	2.11616	2.79514	2.61845	1.10428	1.07499	1.40914	4.625e-05	-1.25171	down
WBGene00001792	gst-44	12	42	27	119	108	127	0.336114	1.09183	0.643495	3.07106	2.6235	3.14266	4.57146e-05	1.62376	up
WBGene00013820	Y116F11B.2	80	114	143	35	71	33	1.81994	2.2909	2.71935	0.688673	1.3313	0.618243	4.48945e-05	-1.48591	down
WBGene00011197	srw-145	97	52	109	298	307	193	1.76272	0.821102	1.64709	4.74324	4.58237	2.92871	4.46316e-05	1.21182	up
Caenorhabditis_elegans_newGene_729	-	44	74	71	257	162	173	0.918303	1.38762	1.24323	4.79454	2.82914	3.10703	4.40644e-05	1.24435	up
WBGene00009955	eak-4	13	37	23	108	100	115	0.452742	1.18638	0.69366	3.50539	3.04064	3.56672	4.20241e-05	1.63401	up
WBGene00015082	B0244.7	123	71	84	18	26	50	3.12111	1.56018	1.77217	0.383625	0.530307	1.05805	3.87901e-05	-1.72266	down
WBGene00011906	hsp-12.1	44	113	81	289	203	250	2.50436	5.66778	3.8855	14.8007	9.78017	12.1804	3.6693e-05	1.2428	up
WBGene00019486	K07D4.6	73	108	118	37	40	53	1.71315	2.22951	2.32408	0.75259	0.773458	1.03541	3.64364e-05	-1.42588	down
WBGene00007716	fbxa-82	11	16	14	92	52	86	0.27259	0.342165	0.298489	2.06487	1.09337	1.84103	3.63996e-05	1.86599	up
WBGene00044406	F02A9.7	65	61	57	190	183	171	2.7092	2.22967	1.97359	6.93701	6.26367	5.98419	3.62479e-05	1.16111	up
WBGene00009222	fbxa-95	53	65	94	237	191	190	1.45363	1.54727	2.12854	5.66129	4.29132	4.34203	3.48012e-05	1.15752	up
WBGene00021081	pals-33	12	2	30	425	549	160	0.250455	0.023192	0.520654	7.84594	9.53419	2.81694	3.47679e-05	2.66937	up
WBGene00012682	asp-16	37	26	38	102	193	112	0.846034	0.523764	0.728968	2.06984	3.68657	2.17825	3.46115e-05	1.51743	up
WBGene00022040	Y65B4BR.1	89	127	104	337	209	340	2.00593	2.50279	1.94835	6.62954	3.84813	6.39521	3.30863e-05	1.08462	up
WBGene00022061	Y67D8B.1	18	26	39	126	95	119	0.393546	0.506066	0.725603	2.45648	1.75078	2.23396	3.29158e-05	1.56156	up
WBGene00000723	col-150	44	96	105	282	184	302	1.22688	2.3679	2.45662	6.94255	4.26421	7.13549	3.24412e-05	1.25775	up
WBGene00009903	F49E12.10	10	4	6	61	48	56	0.277192	0.081515	0.142561	1.59367	1.16942	1.39653	3.21e-05	2.16611	up
WBGene00014002	ZK593.2	142	98	62	284	302	376	6.85897	4.14404	2.46966	12.025	11.9761	15.2493	3.09393e-05	1.22591	up
WBGene00021134	W10G11.1	5	16	11	51	91	70	0.190935	0.606877	0.394804	1.98238	3.32496	2.61244	3.08615e-05	2.01638	up
WBGene00021008	W03F11.5	147	123	186	53	107	61	4.26844	3.12676	4.50839	1.33252	2.54289	1.47765	3.04132e-05	-1.31392	down
WBGene00010468	K01D12.9	418	1050	865	359	332	239	20.8686	45.9826	35.9995	15.619	13.5995	9.96817	2.99256e-05	-1.51899	down
WBGene00012165	cutl-6	80	187	214	22	53	91	1.9574	4.03958	4.38665	0.454167	1.07157	1.85854	2.94491e-05	-1.67081	down
WBGene00001397	fat-5	337	245	163	903	983	1134	8.48364	5.39187	3.40557	19.8282	20.2827	23.8313	2.91814e-05	1.50926	up
WBGene00044461	Y18H1A.14	28	9	4	102	94	101	0.538205	0.156135	0.058912	1.75253	1.52268	1.66777	2.75426e-05	2.05404	up
WBGene00012688	Y39B6A.29	195	308	292	204	149	111	4.00813	5.54777	4.96671	3.64267	2.48488	1.87107	2.57459e-05	-1.06931	down
WBGene00044772	T23E7.6	103	135	142	46	73	68	11.4316	13.1986	13.197	4.46276	6.68695	6.27245	2.56902e-05	-1.29015	down
WBGene00017711	F22E5.13	449	244	387	243	245	148	12.3542	5.88057	8.86443	5.82275	5.51435	3.3851	2.56801e-05	-1.08416	down
WBGene00219288	Y87G2A.25	13	39	56	140	139	174	0.831415	2.23822	3.07817	8.03505	7.50205	9.58986	2.56729e-05	1.60252	up
WBGene00008475	oac-13	9	15	11	56	67	91	0.125122	0.180739	0.121415	0.685917	0.761204	1.06002	2.56122e-05	1.94877	up
WBGene00044738	folt-3	4	10	17	42	81	101	0.074816	0.167472	0.270105	0.718944	1.31173	1.66691	2.55215e-05	2.10354	up
Caenorhabditis_elegans_newGene_956	-	29	19	37	144	144	82	0.216018	0.12303	0.225772	0.940491	0.881409	0.50696	2.54936e-05	1.61558	up
Caenorhabditis_elegans_newGene_1669	-	30	31	34	114	116	125	0.775783	0.703037	0.724795	2.57865	2.47185	2.7237	2.54532e-05	1.44503	up
WBGene00013717	madf-10	73	74	51	252	196	180	2.80845	2.48788	1.61539	8.43293	6.1837	5.75648	2.36272e-05	1.24036	up
WBGene00021848	nhr-239	28	21	24	102	101	109	0.922023	0.618704	0.656733	3.00415	2.7874	3.05748	2.3147e-05	1.58942	up
WBGene00011074	R07A4.3	76	90	91	241	211	236	2.29454	2.39905	2.28731	6.39973	5.24833	5.98474	2.2895e-05	1.03969	up
WBGene00304203	D1086.21	11	14	13	80	66	71	0.48381	0.540655	0.47473	3.099	2.42124	2.63879	2.12707e-05	1.89203	up
WBGene00020152	nhr-211	109	109	83	346	228	284	2.55945	2.23685	1.61586	7.10954	4.38988	5.57449	2.123e-05	1.11012	up
WBGene00044361	K09F6.11	29	36	14	119	131	112	1.63294	1.76923	0.663822	5.92393	6.10524	5.34285	2.04647e-05	1.65814	up
WBGene00009423	F35E8.10	169	163	89	385	384	417	6.02394	5.06628	2.61916	11.9602	11.2084	12.4155	2.00843e-05	1.08212	up
WBGene00017548	F18A1.7	21	33	11	90	150	99	0.633589	0.862218	0.276729	2.38798	3.77889	2.52054	2.00472e-05	1.79148	up
WBGene00017142	EEED8.14	41	65	63	166	168	194	0.959238	1.32226	1.2141	3.39736	3.21351	3.78978	1.99249e-05	1.2416	up
WBGene00013150	pole-4	248	260	284	171	205	110	11.1567	10.23	10.6285	6.70303	7.54348	4.1299	1.91922e-05	-1.01973	down
WBGene00014034	ZK643.2	198	165	200	103	110	123	6.34851	4.64125	5.35058	2.8805	2.88499	3.2816	1.88071e-05	-1.05851	down
WBGene00009702	F44F4.3	6	22	23	120	119	60	0.172145	0.629226	0.644922	3.52545	3.26796	1.6818	1.874e-05	1.93612	up
WBGene00021547	Y44E3A.1	45	83	90	261	240	175	1.98481	3.52012	4.07739	10.5103	9.75411	7.78331	1.78936e-05	1.23987	up
WBGene00000562	cng-1	147	133	210	571	411	317	1.58571	1.25347	1.88651	5.37486	3.63762	2.84978	1.72067e-05	1.03417	up
WBGene00013046	Y50E8A.1	56	73	90	213	190	229	4.45456	5.05302	5.90905	14.7406	12.3852	15.1848	1.71367e-05	1.14512	up
WBGene00044187	ttll-9	41	20	46	125	168	139	0.843178	0.361447	0.795031	2.28277	2.9009	2.42957	1.68526e-05	1.53297	up
WBGene00015918	C17G10.6	31	18	12	96	85	160	0.408159	0.205352	0.130255	1.27015	0.932899	1.81993	1.64859e-05	1.85556	up
WBGene00271775	EGAP1.5	107	97	178	295	417	315	5.58653	4.36144	7.6229	13.2401	17.5604	13.5338	1.58383e-05	1.05186	up
WBGene00007530	C11H1.5	86	125	190	72	55	41	1.29768	1.66722	2.40843	0.948154	0.683836	0.515137	1.55308e-05	-1.46702	down
WBGene00018380	decr-1.1	15	92	25	241	202	221	0.860713	4.67342	1.19853	12.2008	9.61031	10.7252	1.48232e-05	1.78619	up
WBGene00044672	fbxa-4	135	83	112	317	309	288	3.49191	1.88023	2.39954	7.15818	6.56235	6.23851	1.44642e-05	1.07036	up
WBGene00045295	fbxa-222	120	130	87	267	452	280	2.92635	2.79211	1.76537	5.69549	9.07764	5.71259	1.34938e-05	1.1525	up
WBGene00015574	irg-1	18	21	14	86	77	114	0.754973	0.784779	0.472889	3.20751	2.70725	4.07698	1.22906e-05	1.81164	up
WBGene00013166	Y53F4B.20	100	155	188	283	499	413	1.2495	1.70571	1.95609	3.09256	5.13128	4.32768	1.18036e-05	1.05987	up
WBGene00185048	urm-1	156	274	175	94	118	115	11.7007	18.0272	10.9329	6.11623	7.23313	7.20894	1.17118e-05	-1.18173	down
WBGene00009242	sre-6	35	45	39	149	173	116	0.872456	0.991446	0.81723	3.26391	3.57653	2.44182	1.04807e-05	1.43425	up
WBGene00019782	M60.7	16	12	50	131	178	105	0.256962	0.170614	0.679881	1.87143	2.38727	1.43389	1.04442e-05	1.85659	up
WBGene00022838	ZK993.2	68	63	113	215	264	241	1.2804	1.03378	1.76803	3.54387	4.08168	3.85953	1.01919e-05	1.1741	up
WBGene00018142	oac-22	37	68	63	178	208	165	0.47807	0.762582	0.671671	1.99715	2.19611	1.77641	1.01586e-05	1.30624	up
WBGene00003585	ndx-8	26	47	94	183	245	205	0.879077	1.41917	2.70637	5.55057	6.99055	5.95429	1.00106e-05	1.4979	up
WBGene00019648	K11D12.8	18	64	42	188	181	145	0.931208	3.04701	1.88566	8.92652	8.06864	6.56877	9.89553e-06	1.58867	up
Caenorhabditis_elegans_newGene_1311	-	23	28	24	104	141	90	0.281142	0.295722	0.246578	1.15417	1.43934	0.960027	9.82549e-06	1.65197	up
Caenorhabditis_elegans_newGene_595	-	16	33	16	130	119	82	0.312116	1.06277	0.253271	3.895	2.78281	1.66957	9.81989e-06	1.79456	up
Caenorhabditis_elegans_newGene_546	-	6	4	25	72	95	96	0.088838	0.048919	0.35116	1.0897	1.28243	1.35169	9.8026e-06	2.17359	up
WBGene00015281	C01B10.7	131	125	94	38	60	52	8.65497	7.30048	5.15948	2.18184	3.26631	2.7929	9.73603e-06	-1.48176	down
WBGene00013702	Y106G6D.6	64	51	76	237	193	175	3.0303	2.12119	3.03336	9.89386	7.57933	6.99167	9.67275e-06	1.25615	up
WBGene00011023	R05A10.6	74	131	108	35	35	52	1.36854	2.14277	1.67383	0.558314	0.535693	0.800997	9.33879e-06	-1.56692	down
WBGene00021382	Y37F4.1	40	41	42	132	134	182	1.38949	1.22547	1.20569	3.99849	3.79938	5.25317	8.89207e-06	1.42347	up
WBGene00021639	Y47G6A.13	51	65	61	265	147	192	0.951752	1.0691	0.954574	4.35171	2.272	3.01726	8.51691e-06	1.35324	up
WBGene00007656	pals-2	13	27	36	139	136	87	0.29149	0.548997	0.701871	2.88998	2.66074	1.72451	8.41135e-06	1.74497	up
WBGene00021526	Y41G9A.2	60	94	133	36	29	37	2.02854	2.79397	3.73219	1.05226	0.784243	1.02393	8.39508e-06	-1.65929	down
WBGene00021586	clec-75	4	47	18	400	447	369	0.077975	0.912365	0.334248	7.88427	8.26416	6.95039	8.16364e-06	2.69008	up
WBGene00086558	F12E12.12	8	6	13	56	65	80	0.303547	0.193719	0.441303	2.0903	2.2509	2.85456	7.36629e-06	2.15687	up
WBGene00000971	dhs-7	97	143	93	449	378	221	2.05811	2.668	1.6555	8.37216	6.62762	3.9429	6.65884e-06	1.24602	up
WBGene00019101	F59B1.10	172	160	143	81	92	77	3.51202	2.87541	2.43207	1.44804	1.53685	1.30539	6.55088e-06	-1.22963	down
WBGene00012046	T26E4.4	143	330	254	148	119	90	3.10379	6.28795	4.58452	2.79932	2.10925	1.62005	6.46055e-06	-1.28975	down
WBGene00001109	dsl-7	60	71	49	173	198	220	1.03885	1.0798	0.713534	2.63998	2.82639	3.20594	6.33394e-06	1.29356	up
WBGene00008491	bgnt-1.1	14	11	0	88	91	75	0.305772	0.207249	0	1.7132	1.66293	1.39388	6.14321e-06	2.36903	up
WBGene00021603	clec-204	186	209	225	70	150	103	2.96454	2.92095	2.98309	0.962247	1.961	1.36905	6.03661e-06	-1.23542	down
WBGene00015205	moa-2	199	222	194	118	137	113	16.2946	15.9027	13.187	8.38804	9.15101	7.68403	6.02013e-06	-1.05946	down
WBGene00016064	acd-1	6	13	24	102	64	113	0.074776	0.155117	0.273654	1.24014	0.733903	1.31774	5.86812e-06	2.06314	up
WBGene00044977	F56C4.4	36	22	13	138	129	108	2.27238	1.18276	0.664615	8.20955	6.75061	5.96263	5.78275e-06	1.81665	up
WBGene00010509	K02E2.8	133	203	210	94	68	112	5.97344	7.67678	7.48039	3.37034	2.34866	3.86811	5.77941e-06	-1.26553	down
WBGene00008615	F09C6.1	17	26	8	139	90	86	0.660786	0.90637	0.24092	4.88769	2.95936	2.89066	5.74398e-06	1.98663	up
WBGene00013839	fbxa-32	48	72	52	218	189	166	1.32501	1.75256	1.20024	5.30065	4.32343	3.86834	5.73409e-06	1.32092	up
WBGene00019731	M02D8.5	79	91	80	210	267	238	0.800386	0.80446	0.669959	1.85882	2.21284	2.01442	5.64641e-06	1.1228	up
WBGene00011963	T23G5.3	41	34	67	169	157	187	1.41286	1.02882	1.96561	5.18185	4.52056	5.47654	5.63404e-06	1.42874	up
WBGene00019153	H04M03.3	107	85	90	267	271	256	2.57479	1.78364	1.79707	5.63921	5.36603	5.16991	5.56538e-06	1.0973	up
WBGene00013303	Y57G11C.5	56	62	67	198	162	235	0.911339	0.883461	1.28923	3.08784	2.55386	3.31636	5.42406e-06	1.28007	up
WBGene00004139	pqn-54	155	294	422	145	160	147	3.36901	5.60548	7.64782	2.7377	2.84823	2.66945	5.34534e-06	-1.21053	down
WBGene00009318	F32B4.8	85	155	155	60	51	61	0.87021	1.39462	1.3237	0.535448	0.425082	0.522619	5.31449e-06	-1.4371	down
WBGene00015202	B0478.3	189	111	121	454	410	359	7.39562	3.82133	3.95201	15.5675	13.1869	11.7605	5.19191e-06	1.127	up
WBGene00044631	bus-18	279	376	379	231	261	143	5.62979	6.65234	6.36572	4.05952	4.32028	2.40412	5.16028e-06	-1.01564	down
WBGene00015307	C01G5.5	94	177	105	362	395	313	2.56517	4.26175	2.3986	8.66895	8.89619	7.172	4.99869e-06	1.12211	up
WBGene00018267	F41C3.1	6	9	0	51	73	63	0.401001	0.519031	0	3.14136	4.25996	3.73002	4.78976e-06	2.51617	up
WBGene00011275	psf-1	166	205	206	123	72	106	6.84738	7.43246	7.11258	4.42963	2.43105	3.64721	4.55721e-06	-1.22432	down
WBGene00001158	ech-9	53	56	43	208	161	166	0.875588	0.827376	0.600406	3.06316	2.22013	2.32564	4.47484e-06	1.3828	up
WBGene00018201	btb-18	60	96	68	25	13	25	1.76147	2.48915	1.67115	0.647153	0.296999	0.612768	4.36852e-06	-1.92704	down
WBGene00010189	F57B1.6	59	45	59	147	189	243	2.2456	1.50664	1.89038	4.96374	5.99263	7.83007	4.35737e-06	1.39456	up
Caenorhabditis_elegans_newGene_738	-	27	17	40	168	170	83	0.429545	0.241986	0.536036	2.45114	2.31549	1.15728	4.30937e-06	1.79566	up
WBGene00015952	C18B2.1	133	81	84	273	303	362	3.79967	2.02257	1.99303	6.84377	7.13197	8.69259	4.18627e-06	1.2303	up
WBGene00023502	clec-184	191	155	267	122	111	87	4.25869	3.02944	4.97239	2.38219	2.02987	1.61299	3.92597e-06	-1.22497	down
WBGene00008072	C43F9.4	13	8	27	67	141	103	0.3142	0.167573	0.557011	1.4752	2.94515	2.19884	3.8542e-06	2.05597	up
WBGene00022142	Y71G12B.2	26	7	30	111	155	105	0.722389	0.164397	0.703693	2.78518	3.64179	2.50375	3.6906e-06	1.95323	up
WBGene00017471	F14H12.3	106	167	164	78	67	62	3.19721	4.42918	4.1501	2.0634	1.65498	1.56657	3.67606e-06	-1.34229	down
WBGene00002105	ins-22	26	14	23	86	111	134	2.18593	1.01615	1.58756	6.38152	7.77211	9.53585	3.61471e-06	1.83476	up
WBGene00011286	ttr-29	86	111	74	283	450	201	4.55296	5.1899	3.29087	13.1724	19.68	8.97176	3.56347e-06	1.35283	up
WBGene00012236	W04A8.1	297	345	266	222	136	175	3.75626	3.86185	2.80517	2.46255	1.40488	1.85418	3.5487e-06	-1.0834	down
Caenorhabditis_elegans_newGene_1492	-	86	57	92	208	260	268	1.86603	1.07805	1.65755	3.94218	4.62883	4.87293	3.5487e-06	1.2404	up
WBGene00021494	Y40B10B.1	67	112	76	221	293	266	1.83378	2.67527	1.72333	5.26272	6.56509	6.08127	3.12047e-06	1.21532	up
WBGene00021858	Y54F10BM.3	14	20	16	95	98	82	0.153673	0.189965	0.146876	0.935808	0.91065	0.781035	2.97721e-06	1.89345	up
WBGene00138721	pals-37	5	35	21	379	329	167	0.057466	0.384658	0.21447	4.16272	3.38284	1.74844	2.89518e-06	2.66017	up
WBGene00045405	D1086.18	16	14	12	71	78	117	0.526215	0.558833	0.335001	3.00793	3.10014	4.78067	2.79958e-06	2.02602	up
WBGene00011535	T06E4.8	149	307	322	159	125	95	5.74709	10.3721	10.3475	5.34247	3.95085	3.03865	2.75547e-06	-1.29842	down
WBGene00000624	col-47	120	212	283	120	79	66	4.43147	6.85943	8.71181	3.85172	2.37702	2.02137	2.59114e-06	-1.44537	down
WBGene00011752	fbxa-2	40	85	113	326	280	218	0.533827	0.988162	1.25409	3.80781	3.06531	2.42903	2.51149e-06	1.39699	up
WBGene00019995	R10F2.4	102	133	122	348	340	266	5.61477	6.40338	5.56023	16.7355	15.3584	12.2512	2.50955e-06	1.0428	up
WBGene00005293	srh-72	18	12	10	93	124	60	0.478915	0.277866	0.216958	2.16167	2.71217	1.3356	2.49912e-06	2.10272	up
WBGene00044167	C36A4.11	4	6	22	93	104	66	0.21259	0.245187	0.994131	4.47577	4.70613	3.04156	2.46458e-06	2.29057	up
WBGene00010505	K02D3.2	200	348	346	168	206	152	6.82598	10.4022	9.8372	5.00905	5.75425	4.31326	2.45585e-06	-1.06635	down
WBGene00015284	cest-5.2	203	176	241	773	526	398	3.01762	2.29042	2.99359	10.0683	6.4322	4.95448	2.44557e-06	1.076	up
WBGene00020224	T05A7.7	75	58	93	187	293	254	2.42401	1.62333	2.50738	5.29419	7.7957	6.88123	2.30264e-06	1.29116	up
WBGene00044921	F53C11.9	78	116	98	265	346	240	4.97441	6.4614	5.19262	14.7901	18.129	12.807	2.29449e-06	1.15565	up
WBGene00045516	F43D2.7	36	87	94	304	259	205	1.76213	4.04064	3.67949	12.5138	9.99034	8.26863	2.29144e-06	1.4217	up
WBGene00014175	ZK971.1	85	108	76	288	263	246	4.44404	4.93875	3.30695	13.111	11.2577	10.7329	2.22866e-06	1.17166	up
WBGene00007999	tag-297	1921	3143	3723	1917	1651	1699	27.5112	39.4572	44.4157	23.9568	19.3849	20.3241	2.20022e-06	-1.03339	down
WBGene00007694	C23H4.6	31	21	57	163	197	128	0.237303	0.141413	0.368169	1.10435	1.24854	0.825036	2.18766e-06	1.68654	up
Caenorhabditis_elegans_newGene_1446	-	20	2	12	111	142	61	0.200668	0.015182	0.135725	1.15635	1.18978	0.707225	2.14258e-06	2.34644	up
WBGene00017594	F19C7.4	221	291	337	179	190	109	3.49772	4.04071	4.43712	2.46857	2.45543	1.43433	2.11982e-06	-1.12789	down
WBGene00012824	Y43F8B.14	88	89	72	315	264	208	1.29963	1.16457	0.890564	4.10366	3.22318	2.58347	2.11139e-06	1.25128	up
Caenorhabditis_elegans_newGene_713	-	132	117	122	339	394	279	1.04526	1.20654	0.544596	2.29718	1.83678	1.28638	2.06579e-06	1.05992	up
WBGene00271812	F58F12.12	48	55	57	212	219	139	1.9429	1.97006	1.9147	7.5691	7.35979	4.73202	2.04816e-06	1.40865	up
WBGene00007391	C06H2.7	29	56	25	123	209	171	0.605641	1.06325	0.435685	2.30231	3.6713	3.04782	2.02074e-06	1.69483	up
WBGene00008807	F14F3.4	69	116	115	33	39	37	4.29714	6.32919	5.92485	1.78142	1.9717	1.91634	1.9412e-06	-1.66147	down
WBGene00005262	srh-39	5	8	15	73	82	65	0.126277	0.174686	0.345393	1.76769	1.85891	1.49441	1.91325e-06	2.24935	up
WBGene00018318	F41H10.5	96	178	173	351	440	401	2.66548	4.33383	4.02428	8.53555	10.06	9.35341	1.76965e-06	1.05103	up
WBGene00012535	Y37A1A.2	46	78	84	265	197	223	0.835949	1.24281	1.26376	4.20593	2.92842	3.3807	1.68145e-06	1.32715	up
WBGene00015002	B0034.1	203	150	136	414	533	413	5.82381	3.7616	3.25223	10.3733	12.5601	9.90399	1.55129e-06	1.07423	up
WBGene00044011	T06E4.12	281	568	528	284	315	236	9.78178	17.3377	15.3058	8.62948	8.97578	6.84856	1.53916e-06	-1.02394	down
Caenorhabditis_elegans_newGene_1653	-	63	67	114	313	232	240	1.15569	1.07953	1.75814	5.05187	3.5213	3.7154	1.49438e-06	1.29866	up
WBGene00012822	Y43F8B.12	3	10	10	98	71	48	0.164335	0.450079	0.442736	4.67038	3.17501	2.2086	1.41167e-06	2.40689	up
WBGene00017504	F16B4.2	84	91	82	221	279	259	2.11977	2.01397	1.72459	4.86727	5.7856	5.47242	1.38193e-06	1.16804	up
WBGene00017002	D1007.4	349	312	313	214	232	156	16.6248	13.0169	12.436	8.91086	9.05494	6.19075	1.33266e-06	-1.02479	down
WBGene00013493	clec-9	65	58	113	23	14	24	1.44478	1.11654	2.08616	0.431691	0.253639	0.431193	1.29932e-06	-2.02413	down
WBGene00009108	F25D1.3	103	107	188	42	68	38	4.10466	3.75489	6.26879	1.43584	2.20652	1.24717	1.29395e-06	-1.63883	down
WBGene00015340	C02E7.7	356	751	614	207	424	325	32.8037	60.7269	47.1962	16.6169	32.051	24.9881	1.24209e-06	-1.14658	down
WBGene00020361	fbxc-19	5	25	9	102	85	111	0.087052	0.370807	0.118136	1.54488	1.2055	1.60856	1.23198e-06	2.23309	up
WBGene00010765	K10H10.10	21	48	76	193	211	198	0.565913	1.29024	1.75595	4.8331	5.21391	4.69123	1.23083e-06	1.62182	up
WBGene00007590	ttr-43	259	222	129	549	592	655	12.5476	9.42941	5.18332	23.2147	23.5254	26.5332	1.17902e-06	1.14482	up
Caenorhabditis_elegans_newGene_681	-	169	158	185	63	97	93	3.14376	2.59697	2.86103	1.02003	1.47676	1.47064	1.17902e-06	-1.31027	down
WBGene00000730	col-157	257	486	458	290	175	187	7.72844	12.8199	11.4855	7.60664	4.30071	4.68352	1.13559e-06	-1.16636	down
WBGene00018264	cyp-33C6	19	20	33	96	111	165	0.342394	0.323557	0.505134	1.56006	1.70045	2.61188	1.13029e-06	1.85122	up
WBGene00044779	T10H9.8	23	67	17	217	197	163	1.07669	2.7413	0.639737	8.89311	7.55887	6.38408	1.12557e-06	1.88652	up
WBGene00017032	D1044.7	83	103	121	307	250	313	1.88594	2.05918	2.30644	6.13792	4.68692	5.98499	1.12318e-06	1.12957	up
WBGene00011698	cyp-34A1	112	104	155	328	376	301	2.03997	1.66376	2.35725	5.24695	5.63973	4.60487	1.12091e-06	1.06483	up
WBGene00271827	T19H12.15	35	59	40	0	8	6	2.50005	3.70797	2.40481	0	0.421444	0.350421	1.08762e-06	-2.7319	down
WBGene00020599	T20B6.3	263	456	389	206	217	261	9.35053	14.2249	11.5402	6.39266	6.33159	7.75356	1.07437e-06	-1.00683	down
WBGene00011453	ugt-56	122	199	116	449	375	420	1.9991	2.8697	1.58303	6.4507	5.06527	5.76961	1.04416e-06	1.12564	up
Caenorhabditis_elegans_newGene_800	-	115	172	117	396	345	369	7.80875	10.203	6.58196	23.4801	19.216	20.9029	9.7773e-07	1.07983	up
WBGene00019917	clec-43	154	150	139	71	73	67	2.44715	2.08437	1.84048	0.984566	0.944898	0.880175	9.60808e-07	-1.36062	down
WBGene00019761	M03F8.1	85	71	81	260	201	319	2.04939	1.49747	1.6359	5.51523	3.98791	6.46866	9.46621e-07	1.31047	up
WBGene00017721	F22F7.3	101	108	78	3	24	31	1.69753	1.58106	1.08516	0.038096	0.322616	0.434168	9.20258e-07	-2.28659	down
WBGene00011107	R07E3.6	1656	2452	3209	1543	1298	1410	14.7205	19.0978	23.7549	11.9653	9.45662	10.466	9.15321e-07	-1.07641	down
WBGene00020319	npr-31	95	113	92	314	279	268	2.1266	2.22097	1.71134	6.14112	5.12482	5.01192	9.12345e-07	1.13478	up
WBGene00021976	Y58A7A.2	44	70	77	8	17	16	2.50588	3.48665	3.65045	0.352928	0.75534	0.745797	8.96435e-07	-2.21277	down
WBGene00006418	spl-2	67	124	131	300	286	400	1.04513	1.71316	1.71594	4.12956	3.69405	5.27135	8.85751e-07	1.23854	up
Caenorhabditis_elegans_newGene_1098	-	13	34	19	82	153	152	0.222723	0.516045	0.285627	1.28092	2.25258	2.29257	8.80602e-07	1.98137	up
WBGene00012814	Y43F8B.3	1649	2904	2953	1357	1630	1457	12.1576	16.3505	16.1127	7.68771	8.3233	7.60193	8.7364e-07	-1.05768	down
Caenorhabditis_elegans_newGene_1726	-	41	35	45	154	167	148	1.48458	1.09564	1.36617	4.93719	5.00919	4.52363	8.70646e-07	1.51398	up
WBGene00017151	EGAP9.3	106	137	137	351	361	293	2.36559	2.68954	2.56939	6.88968	6.64734	5.4976	8.64278e-07	1.03308	up
WBGene00011430	T04C12.8	55	44	84	218	241	188	3.25516	2.2587	4.22068	11.2957	11.7864	9.40182	8.4108e-07	1.41043	up
WBGene00011021	R05A10.4	159	196	133	517	375	452	9.4512	10.2159	6.59087	26.849	18.2464	22.4292	8.15191e-07	1.07876	up
WBGene00001150	ech-1.1	82	166	269	66	68	40	0.953985	1.70245	2.62892	0.67179	0.654702	0.383935	8.00969e-07	-1.73856	down
WBGene00012942	Y47D3B.6	1103	2141	2140	973	880	771	26.899	45.7756	43.4884	20.7106	17.5822	15.7008	7.87453e-07	-1.30613	down
WBGene00011558	ostf-4	106	134	157	46	59	64	13.4361	14.8062	16.5138	5.02049	6.12508	6.7783	7.40099e-07	-1.48618	down
WBGene00017466	F14F9.3	17	11	16	96	117	73	0.177027	0.099532	0.137662	0.891936	1.02558	0.644076	7.3218e-07	2.07769	up
WBGene00007072	ugt-1	43	70	62	197	228	181	0.687156	0.985953	0.824712	2.76156	3.0013	2.43274	7.29416e-07	1.38402	up
WBGene00018730	F53A9.7	118	245	237	456	708	519	8.19688	14.9439	13.7709	27.7297	40.4694	30.2181	6.87857e-07	1.12154	up
WBGene00016577	clec-3	18	12	18	80	112	102	0.357058	0.208676	0.286164	1.38282	1.82388	1.68602	6.77515e-07	2.02107	up
WBGene00020080	math-37	72	60	52	221	207	215	1.60043	1.15839	0.951368	4.28001	3.7744	3.98404	6.3758e-07	1.37904	up
WBGene00021598	-	73	63	70	198	265	216	2.01737	1.50691	1.60188	4.77362	6.00822	4.97683	6.35724e-07	1.30956	up
WBGene00236809	ZK993.5	15	7	33	159	128	90	0.294517	0.118139	0.559493	2.89652	2.20012	1.57181	5.99321e-07	2.15565	up
WBGene00018835	F54F2.7	342	281	276	175	204	143	15.6549	11.2747	10.4892	6.95321	7.62209	5.45978	5.87738e-07	-1.11398	down
WBGene00020357	T08E11.1	11	0	6	351	386	221	0.144782	0	0.064106	4.17228	4.30955	2.50945	5.86481e-07	3.19607	up
WBGene00001577	gem-4	50	74	38	240	188	205	0.700414	0.910749	0.44727	2.96675	2.18795	2.42076	5.82123e-07	1.5235	up
WBGene00022230	Y73B6A.3	531	337	416	296	245	202	28.7268	15.9587	18.7292	13.9614	10.8658	9.1334	5.36058e-07	-1.11936	down
WBGene00077770	M04D5.3	102	144	161	359	380	333	2.67626	3.31354	3.527	8.25449	8.20589	7.32332	5.35203e-07	1.0341	up
WBGene00015433	C04E12.2	129	134	114	359	353	317	4.80974	4.36984	3.54384	11.6995	10.811	9.87435	5.1039e-07	1.0657	up
WBGene00022496	fbxa-92	52	58	76	227	205	193	2.19874	2.14846	2.65395	8.35781	7.08326	6.79271	4.97441e-07	1.34998	up
WBGene00016590	C42C1.12	214	411	296	185	145	164	13.6211	22.942	15.6794	10.2369	7.52711	8.70415	4.97367e-07	-1.194	down
WBGene00019811	egg-2	20	18	23	104	112	108	0.30343	0.234963	0.290643	1.40313	1.42749	1.39894	4.86126e-07	1.88154	up
WBGene00009061	pals-14	0	8	12	452	740	253	0	0.175475	0.253567	10.2449	15.7796	5.49715	4.83568e-07	3.25826	up
WBGene00008421	D2030.12	37	93	51	266	253	200	1.43501	3.16074	1.62688	9.01034	8.03719	6.47117	4.68485e-07	1.55652	up
WBGene00006660	twk-5	158	180	105	445	386	493	4.12932	4.18588	2.33995	10.4231	8.50462	11.0831	4.12576e-07	1.18048	up
WBGene00018723	F53A3.7	207	356	338	149	179	185	15.0081	22.686	20.4307	9.43601	10.6554	11.2316	4.06312e-07	-1.11483	down
WBGene00235268	Y54G2A.76	698	1068	1214	514	285	321	29.0325	38.9177	42.0464	18.6325	9.7066	11.133	4.05689e-07	-1.62786	down
WBGene00003668	nhr-78	87	105	142	363	320	281	1.68415	1.78789	2.30061	6.17537	5.11613	4.57705	4.048e-07	1.15839	up
WBGene00008332	C55A6.3	154	186	157	370	511	413	5.14361	5.43825	4.3693	10.8202	14.0401	11.5467	3.81918e-07	1.00462	up
WBGene00271715	B0244.17	212	186	196	82	96	120	5.54316	4.26365	4.27191	1.8759	2.04861	2.62937	3.78282e-07	-1.299	down
WBGene00018741	comt-1	185	259	263	139	111	138	2.44955	3.01017	2.9037	1.60413	1.20355	1.5299	3.77874e-07	-1.16515	down
WBGene00012432	Y11D7A.8	6	22	12	80	115	102	0.119742	0.387185	0.195913	1.39224	1.89421	1.70841	3.64312e-07	2.23183	up
Caenorhabditis_elegans_newGene_1654	-	102	109	161	388	294	393	1.80682	1.55294	2.29121	6.39002	4.00639	5.83666	3.48237e-07	1.16141	up
WBGene00015623	C09B8.4	86	79	81	29	18	22	2.59395	2.08388	2.0452	0.751874	0.444427	0.540509	3.45852e-07	-1.97774	down
Caenorhabditis_elegans_newGene_583	-	120	102	169	366	370	351	2.40457	1.77019	2.83606	6.46883	6.22609	5.91962	3.17874e-07	1.10379	up
WBGene00011596	T07G12.5	6	9	17	84	68	108	0.091254	0.11873	0.212116	1.26075	1.03922	1.42183	3.17251e-07	2.32616	up
WBGene00019839	R02F11.1	2552	4154	4593	2447	2301	1943	88.5252	126.288	132.719	74.0773	65.4328	56.2811	2.96917e-07	-1.05738	down
WBGene00045340	T10G3.8	95	66	114	273	318	279	3.56182	2.15216	3.56369	8.92187	9.76361	8.7343	2.86251e-07	1.26654	up
WBGene00019448	frpr-13	141	132	135	350	347	396	2.73776	2.25562	2.18657	5.9559	5.54582	6.45552	2.82055e-07	1.04387	up
WBGene00008644	F10C2.3	55	84	153	353	361	296	0.796886	1.06254	1.8418	4.47005	4.30094	3.58844	2.55062e-07	1.40737	up
WBGene00005111	srd-33	108	96	98	318	263	328	2.91451	2.25959	2.1877	7.49161	5.81966	7.39141	2.50469e-07	1.1982	up
Caenorhabditis_elegans_newGene_1086	-	46	49	38	179	194	157	0.893846	0.827729	0.614678	3.05661	3.11814	2.56966	2.34833e-07	1.54984	up
WBGene00013562	Y75B8A.32	55	98	99	263	256	291	1.01354	1.57891	1.5192	4.22091	3.8649	4.46871	2.34301e-07	1.30194	up
WBGene00001906	his-32	151	98	173	388	426	402	7.40827	4.18263	7.07444	16.648	17.1631	16.5023	2.27177e-07	1.14389	up
WBGene00001542	gcy-17	122	75	129	399	424	268	1.01486	0.549384	0.894529	2.91827	2.91503	1.87318	2.00221e-07	1.3352	up
WBGene00010034	F54B11.11	89	138	125	53	33	27	1.34394	1.83826	1.57813	0.695229	0.401092	0.333115	1.95512e-07	-1.82479	down
WBGene00011844	T19C9.8	203	209	245	61	135	103	5.02343	4.5393	5.06588	1.32258	2.75052	2.12514	1.90373e-07	-1.42123	down
WBGene00004958	spe-4	97	101	66	282	292	297	1.68165	1.53899	0.947809	4.28482	4.17197	4.32591	1.84164e-07	1.31007	up
WBGene00044530	F32D1.11	258	293	405	148	126	221	10.8505	10.8105	14.1765	5.42227	4.31865	7.73784	1.82662e-07	-1.2396	down
WBGene00013897	ZC443.2	27	48	43	165	161	167	1.19826	1.83741	1.59256	6.39943	5.86206	6.17694	1.79211e-07	1.62515	up
WBGene00018113	F36H9.5	163	295	247	653	495	833	3.53165	5.614	4.45787	12.3812	8.81158	15.1174	1.67089e-07	1.12665	up
WBGene00016345	C33E10.1	20	6	9	125	88	91	0.673362	0.182601	0.258203	3.80563	2.50588	2.64789	1.65305e-07	2.36661	up
WBGene00003689	nhr-99	114	155	162	532	413	319	2.3797	2.85099	2.83031	9.74833	7.10614	5.59519	1.65062e-07	1.17905	up
WBGene00020267	T05H4.4	52	43	47	217	158	193	1.54282	1.11148	1.15975	5.61676	3.82897	4.78623	1.56723e-07	1.56078	up
WBGene00016207	C29E4.10	5	20	25	141	120	95	0.060587	0.232165	0.281588	1.6685	1.33621	1.07266	1.54597e-07	2.2243	up
WBGene00014761	F46A8.11	247	323	316	158	197	185	7.55018	8.65641	8.06087	4.20816	4.94126	4.72698	1.50987e-07	-1.03437	down
WBGene00219423	C23H5.15	12	27	12	106	104	129	0.510157	1.03789	0.419697	4.09295	3.74998	4.74606	1.47754e-07	2.1342	up
WBGene00008874	F15H10.7	14	29	39	100	188	171	0.17031	0.32082	0.411146	1.11983	1.99373	1.84812	1.46852e-07	1.96825	up
WBGene00008084	C44C10.3	120	124	141	297	417	361	2.02264	1.831	1.977	4.37474	5.77349	5.09296	1.45412e-07	1.10345	up
WBGene00015395	nhr-147	65	71	63	231	230	211	1.21221	1.15111	0.970622	3.77261	3.53297	3.28858	1.42096e-07	1.34998	up
WBGene00020373	gpx-6	118	117	115	383	398	269	4.89735	4.26597	3.97442	13.947	13.6137	9.36483	1.40715e-07	1.19476	up
Caenorhabditis_elegans_newGene_1274	-	84	31	38	264	221	275	1.09734	0.350347	0.442832	3.54473	2.68385	3.02691	1.31301e-07	1.79286	up
WBGene00013331	Y57G11C.42	184	401	359	171	147	148	2.75392	5.13537	4.39439	2.05187	1.76099	1.77763	1.30404e-07	-1.29681	down
WBGene00009226	cyp-37B1	6	36	10	345	412	245	0.096531	0.52817	0.129314	5.0392	5.65379	3.41856	1.27463e-07	2.97233	up
WBGene00018918	F56A4.10	140	137	124	60	54	36	2.71594	2.33922	2.02307	1.00608	0.856494	0.56425	1.19973e-07	-1.6679	down
WBGene00003562	ncr-2	3	10	11	51	112	90	0.021153	0.060364	0.063018	0.309681	0.645954	0.528025	1.11613e-07	2.56697	up
WBGene00044901	Y41G9A.10	52	57	77	254	223	189	1.96312	1.8854	2.4369	8.47765	6.99397	6.03384	1.10804e-07	1.43678	up
WBGene00000714	col-141	52	52	26	178	195	226	1.41382	1.24973	0.592681	4.25039	4.37641	5.18417	1.10082e-07	1.71851	up
WBGene00000033	abu-10	259	501	417	234	228	143	5.6422	9.59821	7.57711	4.45793	4.08136	2.60744	1.09995e-07	-1.25183	down
WBGene00012170	W01B6.3	213	218	279	141	48	71	3.99222	3.57832	4.35459	2.29654	0.726658	1.11233	1.09788e-07	-1.675	down
WBGene00020364	T08E11.8	0	4	13	277	261	237	0	0.053022	0.177871	4.18304	3.70061	3.4256	1.06275e-07	3.31518	up
WBGene00044091	srbc-60	6	12	4	86	67	79	0.16577	0.316762	0.093861	2.38663	1.72442	2.09935	1.04288e-07	2.55641	up
WBGene00007366	C06B3.7	2	3	13	87	112	47	0.037862	0.059178	0.279386	2.0021	2.43863	1.03725	1.01639e-07	2.77064	up
WBGene00011677	cyp-13A1	37	25	39	133	202	148	0.612949	0.350458	0.524927	1.91207	2.74139	2.03686	9.78248e-08	1.77379	up
WBGene00004816	skr-10	72	79	154	19	35	9	3.02795	2.90601	5.42895	0.669715	1.20797	0.293202	9.73502e-08	-2.29138	down
WBGene00008050	chst-1	101	85	78	19	18	31	2.44449	1.79958	1.57065	0.399676	0.340453	0.617463	9.55659e-08	-2.09145	down
WBGene00020365	T08G2.2	299	326	405	229	217	149	5.99951	5.72498	6.76801	3.99878	3.5634	2.49931	8.96775e-08	-1.10443	down
WBGene00017960	F31F4.11	156	203	256	95	113	63	3.87826	4.42362	5.3102	2.0591	2.27658	1.29601	8.91467e-08	-1.45167	down
WBGene00021648	mis-12	344	447	359	197	267	250	13.4338	14.9888	11.5778	6.65071	8.44762	8.03655	8.77065e-08	-1.01693	down
WBGene00019320	K02E10.6	58	41	38	194	197	187	1.98311	1.23797	1.09116	5.84417	5.57611	5.39204	8.4531e-08	1.61781	up
WBGene00012399	Y6E2A.5	40	36	39	191	249	117	0.813273	0.646242	0.663508	3.43752	4.20934	2.01097	8.40398e-08	1.78868	up
WBGene00022485	fbxa-63	129	136	156	360	386	363	3.80116	3.5283	3.84567	9.31027	9.38663	8.99547	8.26613e-08	1.02927	up
WBGene00015357	C02F12.8	129	185	209	478	423	460	1.58258	1.98908	2.13525	5.13566	4.26684	4.72426	8.13789e-08	1.0237	up
WBGene00004827	skr-21	150	166	209	483	383	569	4.8334	4.6896	5.5953	13.6052	10.1205	15.3318	8.05184e-08	1.08672	up
WBGene00001133	eat-2	40	59	95	256	215	272	0.686354	0.886563	1.3687	3.88609	3.06786	3.94846	7.80482e-08	1.53633	up
WBGene00009840	fbxa-189	88	98	59	372	290	247	1.36922	1.33211	0.76219	5.07191	3.71102	3.22418	7.50267e-08	1.46449	up
WBGene00016302	fbxc-7	8	5	6	76	58	80	0.217768	0.098412	0.13748	1.84391	1.31322	1.85749	7.41956e-08	2.61452	up
WBGene00019404	K05B2.4	15	37	40	171	156	142	0.300399	0.665625	0.687224	3.0902	2.6465	2.45121	7.29317e-08	1.87425	up
WBGene00006677	twk-24	295	191	320	775	647	702	4.01292	2.27979	3.63278	9.21633	7.22588	7.98827	7.28938e-08	1.02663	up
WBGene00013602	Y87G2A.16	76	65	84	219	276	259	1.79914	1.34955	1.65224	4.55003	5.3863	5.15078	6.57997e-08	1.34338	up
WBGene00017089	poml-2	98	111	72	294	375	281	2.28512	2.28601	1.40843	6.03013	7.22959	5.50873	6.45122e-08	1.34489	up
WBGene00020803	T25E4.1	457	975	855	451	519	406	12.9464	24.225	20.1735	11.1545	12.0513	9.59882	5.90333e-08	-1.04018	down
WBGene00018292	F41E6.11	204	444	489	187	160	197	5.12887	9.80558	10.2551	4.1109	3.30178	4.14095	5.45452e-08	-1.33313	down
WBGene00016199	C28H8.8	14	20	5	104	89	145	0.4164	0.539174	0.115647	2.79471	2.26425	3.75027	5.42733e-08	2.3962	up
WBGene00021404	trpl-3	126	122	97	365	378	313	1.4746	1.24912	0.937648	3.72702	3.62074	3.05609	5.40551e-08	1.21762	up
WBGene00018112	F36H9.4	53	58	73	187	230	248	3.80024	3.65574	4.37961	11.7995	13.6028	14.9435	5.36172e-08	1.44759	up
WBGene00011339	T01G5.1	221	245	239	138	95	126	4.12944	4.01281	3.72527	2.25187	1.44905	1.96562	5.31262e-08	-1.27631	down
WBGene00007598	C15A11.4	12	37	40	190	128	187	0.21297	0.607241	0.629654	3.15845	2.00578	2.97608	4.93962e-08	2.0041	up
WBGene00019516	ugt-20	77	73	95	242	309	250	1.2839	1.07364	1.31974	3.53823	4.25215	3.51246	4.70477e-08	1.3153	up
WBGene00016693	srbc-20	0	0	4	48	58	42	0	0	0.094082	1.30788	1.51398	1.09023	4.36045e-08	3.26389	up
WBGene00014186	nhr-244	230	286	330	158	165	91	12.23	13.3313	14.6218	7.33645	7.19409	4.03514	4.35207e-08	-1.32348	down
WBGene00007929	dmd-10	106	87	142	400	325	321	2.89077	2.09256	3.24594	9.56492	7.30384	7.34094	4.26158e-08	1.26166	up
WBGene00014093	ZK829.1	50	44	39	213	191	163	1.59759	1.2258	1.04404	6.02425	5.07536	4.41657	4.09776e-08	1.6409	up
WBGene00021193	math-44	14	5	23	108	96	142	0.226618	0.071111	0.316073	1.55113	1.3003	1.96098	4.04457e-08	2.37322	up
WBGene00020566	ttr-7	138	167	193	393	521	413	6.74808	7.18266	7.89381	16.8452	20.9745	16.9419	3.86709e-08	1.0484	up
WBGene00017315	ugt-36	13	19	22	139	111	95	0.208437	0.270375	0.289894	2.00021	1.50141	1.31348	3.86134e-08	2.11964	up
WBGene00022063	nlp-81	148	271	313	713	752	559	7.76111	12.5211	13.6242	32.7453	32.4234	24.5814	3.75342e-08	1.11322	up
WBGene00045252	Y62H9A.15	76	58	47	219	226	294	4.42133	2.45846	1.88595	9.67159	9.91214	12.6738	3.72408e-08	1.58106	up
WBGene00021441	Y39A3CL.3	124	193	143	62	63	58	15.1632	20.735	14.6025	6.58562	6.26601	5.93262	3.64623e-08	-1.59076	down
WBGene00007973	C36B1.6	86	70	61	333	248	239	3.39443	2.45949	2.00021	11.5162	8.03458	7.91448	3.6264e-08	1.49007	up
WBGene00021336	Y34F4.1	50	92	102	315	244	311	2.27959	3.44247	3.60027	11.686	8.48821	10.9951	3.38816e-08	1.4464	up
WBGene00017806	F26A1.8	38	14	29	173	169	137	0.770949	0.247792	0.484761	3.10207	2.86015	2.346	3.35241e-08	2.01608	up
WBGene00011537	T06E4.10	217	526	405	157	189	198	9.12315	19.376	14.1855	5.7594	6.52204	6.95904	3.18214e-08	-1.35723	down
WBGene00017024	D1022.5	0	4	4	56	45	75	0	0.132022	0.122996	1.84427	1.38864	2.35941	3.11938e-08	3.08606	up
WBGene00022440	Y110A2AL.3	82	59	61	205	257	384	5.48544	3.43176	3.38321	12.0327	14.1674	21.532	3.06634e-08	1.6161	up
WBGene00011554	T07A5.1	29	49	60	170	238	187	0.636152	0.951102	1.11131	3.31103	4.35764	3.48216	3.0068e-08	1.67703	up
WBGene00012420	Y7A9D.1	314	273	307	150	174	187	14.9526	11.3896	12.1883	6.2102	6.7958	7.43766	2.91083e-08	-1.13293	down
Caenorhabditis_elegans_newGene_429	-	19	6	6	103	132	83	0.337783	0.074748	0.073206	1.48529	1.85819	1.19799	2.83997e-08	2.5442	up
WBGene00195183	R04A9.9	42	18	24	160	184	146	2.50238	0.91876	1.21765	8.92304	9.59319	7.80884	2.7976e-08	1.99532	up
WBGene00015554	C06G3.8	343	416	311	163	235	207	14.073	16.9867	10.3983	5.91709	8.56387	7.51999	2.68919e-08	-1.14979	down
WBGene00011141	nlp-66	86	82	89	302	231	354	4.82778	4.02243	4.12992	14.7799	10.6026	16.575	2.5756e-08	1.38714	up
WBGene00019763	galt-1	221	171	158	40	61	91	4.29286	2.91218	2.55284	0.673409	0.96761	1.47237	2.53611e-08	-1.76991	down
WBGene00005271	srh-48	33	43	31	176	182	142	0.71129	0.787865	0.547369	3.50246	3.39127	2.63481	2.52832e-08	1.75915	up
WBGene00019471	cyp-35B2	0	6	0	59	67	53	0	0.094783	0	0.953213	1.01465	0.807394	2.42406e-08	3.22426	up
WBGene00014047	clec-61	32	54	57	163	302	188	0.706378	1.03634	1.04413	3.16629	5.51254	3.48482	2.4238e-08	1.74175	up
WBGene00022550	droe-8	11	14	6	112	147	57	0.182938	0.211275	0.078852	1.67494	2.05413	0.821232	2.39593e-08	2.55716	up
WBGene00019456	K06H7.2	191	319	256	816	601	632	3.8354	5.62237	4.29292	14.3505	9.91772	10.6356	2.31918e-08	1.05963	up
WBGene00010009	F53H4.4	91	63	83	298	274	258	1.90549	1.16442	1.45453	5.4901	4.74036	4.55025	2.27481e-08	1.39927	up
WBGene00011309	R186.8	331	418	431	178	271	255	28.3518	31.6185	30.7106	13.3927	18.4789	18.375	2.19544e-08	-1.06677	down
WBGene00020250	T05C1.3	274	304	290	143	189	100	9.40058	9.14377	8.29213	4.27422	5.31729	2.86743	2.18969e-08	-1.31543	down
Caenorhabditis_elegans_newGene_1650	-	45	71	81	254	240	224	0.774816	1.10112	1.18912	3.93181	3.50351	3.32098	2.14677e-08	1.47017	up
WBGene00004007	pgp-13	55	49	71	313	212	193	0.362805	0.287891	0.392833	1.83138	1.16441	1.08173	2.11237e-08	1.61213	up
WBGene00003575	ncx-10	131	132	110	360	432	335	1.80865	1.59168	1.25048	4.3407	4.88439	3.86533	1.97167e-08	1.2038	up
WBGene00019677	K12H4.2	282	345	362	213	152	196	11.9533	12.8114	12.7837	7.86805	5.27751	6.91935	1.94269e-08	-1.12991	down
WBGene00011678	T10B9.9	95	167	106	386	397	381	5.55566	8.57694	5.14545	19.7033	19.052	18.6507	1.80261e-08	1.27622	up
WBGene00044348	Y71G12B.31	63	59	80	288	251	205	1.45912	1.1317	1.51898	6.71853	4.56913	3.83191	1.70326e-08	1.47529	up
WBGene00021979	Y58A7A.5	43	49	43	229	227	145	1.15024	1.14011	0.954936	5.35026	4.97858	3.24233	1.6566e-08	1.70403	up
WBGene00016135	C26B9.6	121	83	181	381	414	497	3.13736	1.88336	3.90999	8.6635	8.82939	10.8108	1.64864e-08	1.36011	up
WBGene00020898	lido-16	19	13	16	114	123	97	0.562945	0.333638	0.385855	2.98614	3.0148	2.42648	1.59339e-08	2.20371	up
WBGene00019590	K09F6.7	100	143	128	352	375	346	2.83178	3.53976	3.00997	8.71447	8.72602	8.20088	1.463e-08	1.15998	up
WBGene00020943	W02D7.8	7	9	0	93	62	104	0.425771	0.461159	0	4.97931	3.1071	5.35442	1.41564e-08	2.92308	up
WBGene00007551	C13C4.7	104	135	125	390	347	329	2.7704	3.1723	2.78819	9.12211	7.6224	7.36102	1.40075e-08	1.17632	up
Caenorhabditis_elegans_newGene_1287	-	13	8	3	84	181	60	0.346427	0.269241	0.045784	1.9062	3.97404	1.37179	1.39851e-08	2.78722	up
WBGene00010799	chil-12	158	140	127	355	462	456	3.22587	2.50823	2.16685	6.3599	7.76805	7.81642	1.38863e-08	1.19063	up
WBGene00020484	T13C5.3	91	229	190	15	66	14	3.3816	7.52734	5.90436	0.473239	2.0195	0.422147	1.30174e-08	-2.43351	down
WBGene00001766	gst-18	148	171	199	66	75	84	6.88301	7.00278	7.73166	2.6652	2.85476	3.26204	1.28715e-08	-1.48201	down
Caenorhabditis_elegans_newGene_1771	-	34	33	52	178	189	165	0.559727	0.564689	0.728609	2.84154	2.8825	2.49809	1.25685e-08	1.72038	up
WBGene00013840	fbxa-151	37	47	84	214	230	259	1.22704	1.3631	2.30686	6.20223	6.25587	7.20869	1.25563e-08	1.6512	up
WBGene00004229	ptr-15	337	581	580	281	311	310	3.52323	5.38504	5.13033	2.54251	2.63106	2.69488	1.19674e-08	-1.04329	down
WBGene00012657	Y39A1A.20	203	253	304	136	142	118	13.4529	14.6988	16.8237	7.87791	7.72511	6.51847	1.19659e-08	-1.24244	down
WBGene00017390	F12A10.1	15	12	20	67	164	152	1.03799	0.70937	1.17702	4.26451	9.84551	9.28626	1.109e-08	2.37479	up
WBGene00012866	afmd-2	74	100	136	386	293	346	2.36796	2.83758	3.65168	10.9566	7.85474	9.4207	1.07144e-08	1.35049	up
WBGene00020247	T05B11.4	14	13	21	133	98	108	0.269365	0.212121	0.332903	2.27852	1.57622	1.7695	1.0627e-08	2.23897	up
WBGene00005016	sqt-1	8626	13698	15060	8074	7509	7397	230.088	320.184	334.614	187.917	164.573	164.894	1.05818e-08	-1.01213	down
WBGene00077691	T06E4.14	387	754	914	385	314	398	13.9321	23.7794	27.3935	12.0791	9.241	11.9509	9.7466e-09	-1.19234	down
WBGene00008097	ugt-15	144	141	187	504	509	359	2.32208	1.98537	2.51165	7.09169	6.73499	4.83688	9.37404e-09	1.16688	up
WBGene00001646	gna-1	322	420	506	228	215	287	14.3035	16.3887	18.7502	8.84886	7.83125	10.6724	9.29876e-09	-1.08443	down
WBGene00021576	fbxc-51	7	7	21	130	94	98	0.116408	0.090178	0.288824	1.91362	1.28986	1.38044	8.41319e-09	2.51575	up
WBGene00007166	fbxa-152	88	108	149	331	426	329	2.1457	2.31148	3.01498	7.05389	8.52406	6.70947	7.8418e-09	1.27942	up
WBGene00015624	C09B8.5	14	22	25	152	101	139	0.294124	0.406395	0.447356	2.86881	1.79031	2.5119	7.77778e-09	2.14717	up
WBGene00016074	dnsn-1	476	491	468	328	320	222	7.46497	6.78657	5.85393	4.50816	3.98851	2.80859	7.08881e-09	-1.05404	down
WBGene00021223	Y19D10A.8	125	127	122	38	51	34	2.5465	2.23187	2.02873	0.673131	0.826376	0.539924	6.91883e-09	-1.83895	down
WBGene00018748	F53C3.4	170	111	132	439	568	377	4.57717	2.54478	2.96173	10.1619	12.8541	8.49924	6.75622e-09	1.33549	up
WBGene00009706	argk-1	28	55	60	210	198	219	0.632855	1.10526	1.12906	4.18937	3.72341	4.19761	6.54284e-09	1.70948	up
WBGene00010951	M199.2	157	263	224	502	640	601	2.70733	3.98955	3.23106	7.57949	9.08497	8.69661	6.42287e-09	1.07401	up
WBGene00019550	K09C4.5	275	199	243	89	85	132	4.41484	2.79773	3.24709	1.24884	1.11752	1.76823	6.40469e-09	-1.521	down
WBGene00001107	dsl-5	242	237	296	125	108	43	7.37113	6.33651	7.52519	3.33047	2.7022	1.08387	6.27136e-09	-1.73534	down
WBGene00008598	spin-3	159	276	193	54	105	74	2.64246	4.02149	2.67853	0.781935	1.43374	1.02718	6.17952e-09	-1.68799	down
WBGene00284846	ZC262.13	48	49	67	217	233	196	3.32053	2.96023	3.92237	13.3235	13.4223	11.474	6.11927e-09	1.56498	up
WBGene00044527	Y39H10B.2	148	143	225	507	531	427	4.30986	3.63394	5.66554	12.9566	12.7466	10.4507	5.93537e-09	1.14092	up
WBGene00020714	T23B3.6	197	278	216	539	601	673	4.08069	5.05456	3.7235	9.76613	10.2248	11.6712	5.61883e-09	1.02569	up
WBGene00003702	nhr-112	64	94	100	265	391	267	1.53973	2.00632	2.02887	5.6381	7.81079	5.44515	5.37641e-09	1.44359	up
WBGene00044221	F41G3.18	111	52	102	296	440	350	6.43627	2.74381	5.3775	15.4916	22.6752	18.5304	5.13858e-09	1.59767	up
WBGene00008953	F19C6.4	187	96	171	475	583	480	2.74615	1.23354	2.09425	6.1011	7.0333	5.90325	5.13575e-09	1.35504	up
WBGene00021085	W08E12.4	163	311	307	109	116	122	7.974	13.3782	12.5401	4.63725	4.66026	4.99346	4.96245e-09	-1.44498	down
WBGene00010188	F57B1.5	114	125	195	393	500	414	6.64234	6.3819	9.49493	20.0978	24.0095	20.2654	4.94046e-09	1.22245	up
WBGene00016797	C50A2.3	158	222	173	460	613	482	4.55111	5.78451	4.12665	11.6482	14.6158	11.8975	4.57505e-09	1.11767	up
WBGene00020359	math-40	88	175	127	410	420	422	2.49039	4.35449	3.01495	10.1947	9.79629	10.0469	4.42962e-09	1.30531	up
WBGene00009178	uggt-2	59	52	51	227	193	250	0.380293	0.293897	0.273127	1.28589	1.02724	1.35588	4.40555e-09	1.61743	up
WBGene00014251	gstk-1	462	491	537	232	382	289	16.0795	14.9784	15.5611	7.04295	10.8911	8.39141	4.26919e-09	-1.05316	down
WBGene00016191	C28G1.6	79	116	110	349	379	276	2.11098	2.72695	2.44661	8.20029	8.36158	6.19162	4.20514e-09	1.33551	up
WBGene00012371	W09G3.8	258	332	346	178	170	187	20.6101	23.001	23.0511	12.4253	11.2577	12.39	4.17846e-09	-1.12264	down
WBGene00000029	abu-6	106	257	239	37	45	85	2.50765	5.33019	4.69758	0.753739	0.863957	1.67613	4.10141e-09	-2.01422	down
WBGene00016310	txt-18	90	171	176	554	446	410	2.20827	3.67028	3.59904	11.8639	8.9648	8.39666	3.83243e-09	1.32215	up
WBGene00044074	mltn-5	104	147	161	54	28	17	1.2891	1.58787	1.65826	0.575084	0.281586	0.171955	3.67029e-09	-2.1816	down
WBGene00008513	F02A9.1	131	165	122	351	474	474	4.29352	4.75721	3.32803	10.0921	12.8225	13.0517	3.40164e-09	1.24824	up
WBGene00016598	C42D4.13	63	52	63	268	209	233	2.13446	1.5315	1.77947	7.9762	5.84649	6.6393	3.35763e-09	1.57663	up
WBGene00015045	cyp-34A10	6	3	15	65	119	116	0.094263	0.04402	0.219741	0.989382	1.72568	1.70405	3.26814e-09	2.79556	up
WBGene00000024	abu-1	243	389	503	210	125	170	4.78969	6.72967	8.27413	3.60904	2.02096	2.80476	3.08952e-09	-1.43638	down
WBGene00008091	C44F1.1	527	664	709	346	278	481	5.97344	6.59427	6.68517	3.41467	2.57767	4.55162	3.05825e-09	-1.09702	down
WBGene00015139	B0310.3	116	109	120	338	343	364	2.07776	1.85644	1.93072	5.70345	5.43989	5.77188	3.05661e-09	1.21795	up
WBGene00004398	rol-8	6623	10481	12233	5721	5694	5508	162.757	225.715	250.349	122.677	114.683	113.046	2.88163e-09	-1.0987	down
WBGene00021219	Y19D10A.4	292	282	299	537	1068	1101	5.66584	4.88726	4.82557	9.31328	19.4206	17.8739	2.82114e-09	1.24311	up
WBGene00015279	cest-5.1	88	113	132	347	420	301	1.38773	1.5576	1.72401	4.77773	5.41976	3.9585	2.75221e-09	1.30298	up
WBGene00014052	ZK669.2	246	321	309	107	181	143	7.43369	8.48993	7.77537	2.81658	4.47506	3.58813	2.69448e-09	-1.32984	down
WBGene00017051	afmd-1	63	58	59	201	236	300	1.77105	1.43221	1.36986	4.93867	5.46277	7.06348	2.61167e-09	1.60682	up
WBGene00194641	F47G3.4	118	148	82	364	538	384	8.65031	9.56941	4.99922	23.4187	32.5849	23.6598	2.55889e-09	1.467	up
WBGene00017786	F25E5.5	333	315	224	831	907	718	7.49614	6.20817	4.20368	16.3359	16.7519	13.5109	2.48912e-09	1.10545	up
WBGene00017785	F25E5.4	187	235	290	751	548	620	3.10272	3.40853	3.99688	10.8783	7.45458	8.58708	2.47546e-09	1.07628	up
WBGene00010658	K08D8.4	534	460	565	303	387	267	8.53313	6.41766	7.5547	4.2089	5.0725	3.54686	2.34285e-09	-1.03902	down
WBGene00008890	ser-5	133	182	209	401	545	603	2.26117	2.71243	2.96918	5.96829	7.62836	8.60226	2.24669e-09	1.19699	up
WBGene00016783	irg-2	9	6	22	108	125	109	0.259376	0.129939	0.522156	2.78578	3.01426	2.69249	2.20518e-09	2.53711	up
WBGene00015748	C14A11.2	74	123	125	325	391	337	2.17502	3.16598	3.05885	8.38495	9.46873	8.30866	2.2032e-09	1.33291	up
WBGene00044723	K11H12.11	339	212	342	158	110	80	7.4303	4.06604	6.24481	3.00867	1.97167	1.46239	2.18762e-09	-1.635	down
WBGene00011668	clec-47	374	368	268	934	890	839	17.1344	14.7815	10.2006	37.3553	33.4507	32.1103	2.16022e-09	1.01937	up
WBGene00010319	F59B10.3	419	683	704	416	320	279	12.6205	18.0416	17.6843	10.9492	7.89521	7.01074	1.98662e-09	-1.13686	down
WBGene00045397	Y54G2A.52	240	224	249	553	722	571	12.2376	10.0152	10.598	24.6669	30.2565	24.3742	1.98375e-09	1.00272	up
WBGene00021565	Y45G12C.1	233	259	274	151	104	99	5.15721	5.04209	5.05668	2.91002	1.88495	1.83439	1.97678e-09	-1.40886	down
WBGene00011643	slc-17.9	129	157	198	44	75	44	1.87908	1.99172	2.39388	0.550399	0.885696	0.534344	1.89649e-09	-1.80599	down
WBGene00004052	parg-2	29	21	26	121	154	186	0.545831	0.345964	0.410024	1.99711	2.40527	2.95091	1.83106e-09	2.07753	up
WBGene00018345	F42C5.3	12	3	9	305	476	115	0.373372	0.031607	0.215364	8.51622	12.5117	3.18855	1.78973e-09	3.48619	up
WBGene00007745	C26D10.4	209	170	243	553	578	532	2.28023	1.6238	2.2091	5.26397	5.16607	4.84528	1.77346e-09	1.05207	up
WBGene00077764	F59C6.16	18	6	7	93	184	90	1.95938	0.582351	0.575117	8.99227	16.8219	8.3647	1.76978e-09	2.72901	up
WBGene00000099	air-2	555	583	792	484	353	342	13.7531	12.6508	16.3359	10.4554	7.17231	7.0765	1.76958e-09	-1.02921	down
WBGene00019108	chpf-2	185	200	225	486	658	497	6.95127	6.58736	7.05229	15.9774	20.3332	15.6396	1.76508e-09	1.06028	up
WBGene00009824	gpdh-1	636	626	982	426	418	547	13.4953	11.6445	17.3591	7.87819	7.26383	9.69921	1.70537e-09	-1.00795	down
WBGene00015537	C06E4.8	2	0	0	60	48	42	0.052848	0	0	1.72041	1.27201	1.1481	1.67322e-09	3.61583	up
WBGene00010987	R03C1.1	185	442	537	140	174	142	3.91359	8.60574	10.0687	2.49621	3.12223	2.67183	1.65998e-09	-1.59801	down
WBGene00020487	T13C5.7	77	113	189	32	34	15	3.39533	4.40131	7.07231	1.22052	1.21472	0.546	1.5856e-09	-2.30882	down
WBGene00012271	W05B2.2	173	213	303	93	55	104	1.23085	1.33458	1.79994	0.578746	0.320385	0.617305	1.54929e-09	-1.69302	down
WBGene00018354	F42G2.5	41	67	104	326	351	236	0.778841	1.12288	1.66882	5.49445	5.56891	3.81435	1.48839e-09	1.69834	up
WBGene00019014	F57C12.2	92	123	158	352	531	365	2.80883	3.31205	4.04725	9.44718	13.3943	9.38275	1.42648e-09	1.3625	up
Caenorhabditis_elegans_newGene_706	-	25	23	16	158	199	102	0.250007	0.203015	0.136215	1.51086	1.81902	0.87193	1.3735e-09	2.25821	up
WBGene00020363	fbxa-3	91	127	77	416	368	305	2.41172	2.94391	1.69025	9.66794	8.0321	6.78115	1.33577e-09	1.47751	up
WBGene00045048	D1007.19	84	72	81	15	15	16	4.47091	3.35732	3.56467	0.694988	0.632545	0.700254	1.33025e-09	-2.43425	down
WBGene00012424	dlc-3	84	94	153	378	442	321	5.6396	5.53195	8.55717	22.118	24.246	17.9897	1.32197e-09	1.40562	up
WBGene00021079	W08A12.2	119	112	155	329	475	417	8.07111	6.24771	8.63771	18.513	25.0555	22.7689	1.31074e-09	1.28077	up
WBGene00012921	Y46G5A.36	111	186	268	64	47	17	5.80872	8.52702	11.6976	2.90416	1.98377	0.707355	1.30697e-09	-2.24654	down
WBGene00011799	T16G1.5	43	79	47	286	254	216	0.786352	1.26723	0.715293	4.56858	3.81098	3.30138	1.29202e-09	1.72771	up
WBGene00044483	H06H21.11	508	525	446	328	279	301	24.7316	22.4244	18.0776	13.9396	11.1476	12.2496	1.28683e-09	-1.04031	down
WBGene00015692	ugt-25	321	447	643	1638	1823	2386	5.35478	6.53797	8.94464	23.8747	24.9726	33.2997	1.26888e-09	1.64969	up
WBGene00011171	R09E10.1	134	101	131	388	429	352	3.41003	2.23016	2.77341	8.87643	9.01835	7.49689	1.23043e-09	1.28612	up
WBGene00014020	ZK632.14	741	738	622	360	405	525	25.0978	21.8982	17.5462	10.6274	11.2247	14.8528	1.19763e-09	-1.0438	down
WBGene00020040	R12E2.15	338	697	706	289	334	278	29.8635	54.0414	51.9998	22.319	24.1845	20.5466	1.11662e-09	-1.2452	down
Caenorhabditis_elegans_newGene_138	-	54	61	85	6	13	7	1.28883	1.27164	2.07789	0.104729	0.240376	0.135958	1.00494e-09	-2.80511	down
WBGene00044001	C09G4.4	333	394	459	247	252	215	15.2685	15.8249	17.5475	9.90038	9.48732	8.23943	9.31351e-10	-1.05395	down
WBGene00019022	F58A6.1	139	197	260	513	556	721	4.18859	5.21868	6.55717	13.5677	13.7923	18.2374	8.86394e-10	1.22718	up
WBGene00001096	dsc-1	53	42	108	267	302	357	1.40496	0.973988	2.39381	6.19617	6.57546	7.9197	8.83873e-10	1.76814	up
WBGene00022643	ZK6.8	98	118	133	319	407	362	1.64635	1.73612	1.85178	4.68253	5.60802	5.08854	8.49365e-10	1.26458	up
Caenorhabditis_elegans_newGene_1764	-	367	410	371	154	247	215	10.7929	10.5502	9.08516	3.94279	5.94738	5.22855	7.95024e-10	-1.22346	down
WBGene00004453	rpl-39	5469	7703	7449	2599	4025	3991	644.093	794.966	730.53	267.049	388.459	392.468	7.89958e-10	-1.26801	down
WBGene00022345	fbxa-138	9	8	48	219	203	177	0.296833	0.222905	1.32927	6.39229	5.56018	4.95207	7.52171e-10	2.57272	up
WBGene00009981	F53F1.3	724	552	706	469	376	370	22.2258	14.8475	18.0352	12.5652	9.46016	9.48041	7.31774e-10	-1.04133	down
WBGene00003856	odr-10	115	166	242	513	549	531	2.85124	3.61625	5.02248	11.1663	11.2288	11.063	7.21124e-10	1.24891	up
WBGene00019660	K11H12.4	375	427	353	150	174	250	8.06615	8.04485	6.32165	2.80191	3.06579	4.48266	7.055e-10	-1.32481	down
WBGene00001695	grd-6	506	896	953	509	457	343	8.02821	12.3013	12.5125	6.91967	5.78613	4.43114	6.89965e-10	-1.15069	down
WBGene00001750	gst-2	141	126	108	500	452	343	5.94981	4.65984	3.7983	18.4007	15.6292	12.0971	6.7475e-10	1.38577	up
WBGene00008591	F08H9.3	28	22	28	157	262	115	1.294	0.883058	1.07065	6.48992	10.1624	4.55542	6.74066e-10	2.21968	up
WBGene00003718	nhr-128	175	164	239	496	522	591	3.35632	2.74463	3.76954	8.29588	8.38266	9.00753	6.68676e-10	1.11411	up
WBGene00020612	arrd-22	565	645	668	292	395	469	10.3195	10.3256	10.1689	4.65708	5.91698	7.16238	6.57453e-10	-1.03	down
WBGene00008681	scrm-4	238	211	234	572	815	557	6.74561	5.23478	5.52133	14.1436	18.9359	13.188	6.46522e-10	1.12987	up
WBGene00004452	rpl-38	14557	19827	17422	8183	11557	11270	1419.49	1695.21	1414.89	695.653	924.274	918.77	5.96823e-10	-1.06829	down
WBGene00012020	gyg-2	144	125	196	486	437	471	3.71807	2.83099	4.21971	10.999	9.30232	10.2002	5.68782e-10	1.2154	up
WBGene00006897	ver-4	291	342	320	171	162	189	2.16215	2.22605	1.97806	1.10578	0.979971	1.16731	5.48578e-10	-1.18911	down
WBGene00016066	acd-2	83	65	122	313	614	300	0.996307	0.684155	1.22635	3.29322	6.07448	3.01924	5.31461e-10	1.74918	up
WBGene00016034	C24A3.4	130	162	187	420	443	579	3.16991	3.47807	3.80302	8.96435	8.8887	11.8371	5.17891e-10	1.22282	up
WBGene00017747	F23F1.6	91	98	95	321	378	279	1.35366	1.27968	1.17393	4.17535	4.61966	3.46788	4.96877e-10	1.39035	up
WBGene00022374	nhr-277	411	404	517	270	301	244	7.15717	6.15651	7.49357	4.0939	4.28459	3.53942	4.85542e-10	-1.03666	down
WBGene00018415	nhr-184	170	121	172	571	466	441	3.75189	2.32689	3.15805	11.0025	8.42855	8.1251	4.80441e-10	1.29015	up
WBGene00016926	nhr-171	4	11	3	125	90	68	0.089403	0.208718	0.037726	2.4503	1.65006	1.26327	4.23856e-10	3.01684	up
WBGene00018880	acc-3	96	120	112	299	416	373	1.5017	1.65263	1.47015	4.11032	5.36742	4.90509	3.83071e-10	1.34405	up
WBGene00011672	cyp-13A5	122	55	155	831	996	804	2.01936	0.803448	2.14966	12.0834	13.6082	11.201	3.79911e-10	2.39347	up
WBGene00020039	R12E2.14	215	570	489	169	161	181	18.8856	43.8858	35.7663	12.8947	11.576	13.2303	3.68467e-10	-1.5777	down
WBGene00016976	C56E10.3	67	40	75	319	273	232	0.927406	0.485652	0.87591	3.89557	3.13881	2.70819	3.56322e-10	1.74485	up
WBGene00007729	clec-185	108	130	125	12	19	41	1.95256	2.05905	1.87007	0.183201	0.271106	0.608726	3.3214e-10	-2.42378	down
WBGene00011285	ttr-28	237	257	313	100	158	109	12.0043	11.4018	13.2321	4.4067	6.5712	4.59334	3.28142e-10	-1.43662	down
WBGene00020300	ssna-1	440	721	562	303	362	350	24.297	34.3546	25.4986	15.2152	16.1688	16.2043	3.25649e-10	-1.08667	down
WBGene00000168	apx-1	354	308	488	169	191	226	4.18308	3.20991	4.828	1.81091	1.83682	2.22516	3.22598e-10	-1.28142	down
WBGene00012699	Y39B6A.41	5	21	18	147	150	105	0.082317	0.310215	0.247637	2.22007	2.12379	1.52246	3.15725e-10	2.5564	up
WBGene00008494	F01D5.3	177	179	158	65	25	15	7.42264	6.56892	5.51665	2.35492	0.852451	0.524425	3.10915e-10	-2.39582	down
WBGene00011699	cyp-34A2	12	13	20	106	156	109	0.193044	0.184905	0.271631	1.56693	2.17033	1.54145	3.07376e-10	2.43945	up
WBGene00044894	Y71F9AR.4	322	269	275	137	147	141	16.0678	11.7624	11.4432	5.94473	5.98829	5.8695	3.02372e-10	-1.34848	down
WBGene00021176	txt-3	152	105	161	485	491	397	3.72186	2.25448	3.2838	10.4011	9.88988	8.15512	3.00937e-10	1.32835	up
WBGene00000788	cpz-1	2978	4550	5135	10389	11567	10682	78.9209	105.308	113.06	239.797	250.902	236.632	2.97741e-10	1.01887	up
WBGene00235114	ZK105.13	99	98	166	366	451	404	3.28652	2.84945	4.59309	10.6148	12.2953	11.2316	2.96539e-10	1.37398	up
WBGene00022329	fbxa-79	107	94	174	551	393	410	2.85135	2.19997	3.87054	12.8849	8.63013	9.16727	2.96021e-10	1.47113	up
WBGene00020941	W02D7.5	22	16	10	109	148	150	0.730024	0.452791	0.260453	3.15693	4.04688	4.16231	2.90809e-10	2.44745	up
WBGene00009447	F35H8.2	213	194	257	547	589	616	4.66039	3.72538	4.67384	10.4572	10.5775	11.2668	2.84999e-10	1.03721	up
WBGene00019444	frpr-11	53	77	63	231	314	246	1.26615	1.60731	1.24654	4.81958	6.14377	4.91105	2.75609e-10	1.62083	up
WBGene00001671	gpa-9	79	69	79	243	332	294	1.94236	1.48886	1.61476	5.20861	6.69093	6.03451	2.50843e-10	1.52759	up
WBGene00020105	R148.7	152	255	257	90	87	89	5.18076	7.60344	7.28786	2.66397	2.42913	2.52096	2.42671e-10	-1.58953	down
WBGene00001756	gst-8	17	9	7	77	156	145	0.68306	0.297936	0.224416	2.73316	5.2173	4.93546	2.38925e-10	2.74129	up
WBGene00017201	grsp-4	2848	4182	4987	1650	2121	2273	133.241	171.463	194.325	67.3414	81.3438	88.796	2.32401e-10	-1.29048	down
WBGene00016492	C37A2.6	172	169	212	82	66	61	5.95399	5.10329	6.09562	2.45659	1.86745	1.75206	1.93999e-10	-1.67421	down
WBGene00004451	rpl-37	355	443	371	137	229	214	30.0321	32.5539	26.076	9.96853	15.8766	15.0449	1.93142e-10	-1.32882	down
WBGene00007878	C33A11.2	49	78	55	313	271	220	1.27935	1.78598	1.18366	7.14791	5.80543	4.80121	1.87327e-10	1.71968	up
WBGene00018511	F46F11.8	151	176	144	392	679	514	3.12011	3.20109	2.47758	7.10599	11.5634	8.90942	1.84149e-10	1.35633	up
WBGene00022597	ZC395.5	30	38	42	171	228	169	2.17537	2.47009	2.55509	11.0972	13.9073	10.4611	1.81845e-10	1.91299	up
WBGene00008616	fbxa-44	141	188	153	484	536	423	3.83488	4.49441	3.47831	11.5307	11.9968	9.65419	1.76325e-10	1.20749	up
WBGene00044331	clec-25	34	27	31	121	239	229	0.832777	0.586273	0.626767	2.63966	4.90132	4.78908	1.58684e-10	2.15506	up
WBGene00007537	fipr-8	39	52	29	178	270	209	3.12675	3.8245	2.04977	13.1299	18.7356	14.8742	1.57228e-10	1.97101	up
WBGene00271817	F55C12.19	49	86	51	315	270	253	2.1639	3.35597	1.88412	12.2204	9.83416	9.40417	1.27213e-10	1.74495	up
WBGene00017838	F26G1.2	257	166	255	779	721	597	10.3195	6.00121	8.8188	26.74	23.6479	19.8731	1.22982e-10	1.24688	up
WBGene00019473	cyp-35A5	85	131	92	20	20	4	1.44147	1.94767	1.30243	0.286586	0.27639	0.049014	1.15128e-10	-2.76665	down
WBGene00011540	T06E6.10	122	126	118	310	494	530	4.02874	3.67256	3.26358	8.98683	13.477	14.7092	1.0768e-10	1.46446	up
WBGene00010041	F54C9.3	223	241	272	653	927	567	17.644	16.72	17.9554	45.2225	60.3093	37.5601	1.0487e-10	1.17251	up
WBGene00000521	cky-1	276	452	472	187	232	184	3.31813	4.77382	4.73439	1.96425	2.28674	1.84642	1.01484e-10	-1.29529	down
WBGene00012476	Y18D10A.3	186	146	218	559	569	497	4.24112	2.90822	4.12797	11.137	10.6499	9.47207	1.01166e-10	1.1913	up
WBGene00011213	R10E8.8	100	103	174	411	441	415	2.5753	2.46109	3.84049	9.459	9.71865	9.17466	1.00988e-10	1.377	up
Caenorhabditis_elegans_newGene_166	-	42	22	20	192	220	166	0.862192	0.424985	0.345956	3.25472	3.44055	2.37459	9.84698e-11	2.22711	up
WBGene00003686	nhr-96	229	210	269	792	622	586	5.26311	4.21073	5.13706	15.8747	11.7173	11.2429	9.48722e-11	1.13311	up
WBGene00012187	rpb-11	542	884	741	295	474	431	34.1891	48.4496	38.5852	16.194	24.1455	22.7976	9.05839e-11	-1.17235	down
WBGene00007453	fbxa-98	8	41	28	250	170	190	0.217486	1.04467	0.65479	6.24479	3.93695	4.47112	8.17873e-11	2.42899	up
WBGene00045272	F59C12.4	103	165	122	38	33	31	10.4839	14.7213	10.267	3.30581	2.75066	2.61068	8.17685e-11	-2.12632	down
WBGene00014106	ZK856.5	560	464	453	271	226	295	10.1859	7.45304	6.88251	4.30827	3.36632	4.47063	7.6876e-11	-1.23163	down
WBGene00012428	Y11D7A.3	418	388	286	916	1075	1100	6.99901	5.67818	3.96864	13.3777	14.7316	15.3745	6.83615e-11	1.11604	up
WBGene00271815	K04A8.21	0	0	0	48	53	44	0	0	0	2.85802	2.96704	2.52648	6.74929e-11	4.02753	up
WBGene00020583	T19D12.9	302	249	361	138	155	146	5.58988	4.04812	5.5748	2.22244	2.34397	2.26066	6.50192e-11	-1.36576	down
WBGene00020407	chil-24	133	107	117	456	379	388	2.97975	2.09788	2.18417	8.95667	6.98765	7.29148	6.45154e-11	1.38423	up
WBGene00022072	cpg-9	492	584	417	291	235	273	31.0436	32.3111	21.9267	15.9944	12.1276	14.3796	5.77704e-11	-1.22998	down
WBGene00007525	C11G10.1	69	97	130	370	366	333	2.19484	2.72065	3.48259	10.3676	9.64743	8.93144	5.77e-11	1.47534	up
WBGene00017022	D1022.3	67	45	79	270	337	247	2.12447	1.24537	2.11082	7.55184	8.86264	6.60995	5.75931e-11	1.73431	up
WBGene00003644	nhr-54	111	148	92	450	412	398	2.27266	2.65906	1.55936	8.07705	6.94749	6.82502	5.57596e-11	1.44729	up
WBGene00016187	C28G1.2	0	5	0	60	106	58	0	0.142846	0	1.82296	3.00664	1.6852	5.3855e-11	3.68266	up
WBGene00013903	ugt-3	27	18	24	188	144	146	0.461727	0.273408	0.341849	2.86465	2.04912	2.11835	5.00697e-11	2.25846	up
WBGene00008967	F20B10.3	347	510	671	275	261	263	10.979	14.1374	17.692	7.58115	6.75474	6.94645	4.34182e-11	-1.23596	down
WBGene00007508	C10C5.4	18	3	10	168	171	87	0.343867	0.036171	0.161893	2.8955	2.76424	1.43505	4.29734e-11	2.93905	up
WBGene00044617	bus-1	250	189	268	80	57	106	3.34094	2.21527	2.9792	0.932614	0.61622	1.18098	4.24396e-11	-1.80309	down
WBGene00007622	C16C10.1	580	660	628	321	330	458	11.7655	11.7485	10.6109	5.67757	5.48346	7.75633	4.15378e-11	-1.08266	down
WBGene00007660	pals-6	9	17	2	399	527	253	0.169798	0.293097	0.023531	7.15915	8.88827	4.35274	4.03692e-11	3.71957	up
WBGene00015611	C08F1.8	44	47	68	250	247	218	1.40479	1.31809	1.83534	7.06788	6.54141	5.89063	3.88494e-11	1.75299	up
WBGene00012221	W03C9.5	183	235	262	627	572	619	12.9623	14.5691	15.4286	38.7861	33.208	36.6312	3.8845e-11	1.06408	up
WBGene00000886	cyn-10	374	427	499	251	271	258	17.4834	17.485	19.6546	10.484	10.4171	9.81917	3.41664e-11	-1.06257	down
WBGene00010033	F54B11.10	244	206	186	87	73	49	12.556	9.26922	7.95313	3.89619	3.05349	2.0888	3.36896e-11	-1.87224	down
WBGene00011310	T01B4.3	161	163	229	679	618	455	8.03198	7.13329	9.53097	29.7119	25.3946	19.0323	3.36485e-11	1.29454	up
WBGene00000979	dhs-16	276	376	420	164	189	199	5.87787	7.00286	7.43616	3.02936	3.29025	3.52271	3.34255e-11	-1.26669	down
WBGene00016262	C30F12.3	69	95	75	290	301	325	2.00008	2.39765	1.79447	7.33708	7.1588	7.8854	3.12578e-11	1.54035	up
WBGene00003706	nhr-116	152	189	190	514	541	460	2.9533	3.21506	3.07041	8.72069	8.62797	7.46717	2.86671e-11	1.14792	up
WBGene00018931	ugt-52	70	77	108	343	321	295	1.14462	1.09864	1.47793	4.92036	4.33291	4.05323	2.64821e-11	1.52471	up
WBGene00007544	fipr-6	36	32	18	169	275	172	3.12825	2.40619	1.26943	12.9387	19.8157	12.5704	2.28378e-11	2.28591	up
WBGene00020033	R12E2.7	421	988	774	370	350	298	29.2936	60.2943	44.8453	22.4582	19.9373	17.32	2.1855e-11	-1.39247	down
WBGene00022495	fbxa-78	39	48	59	232	196	300	1.24412	1.35688	1.59607	6.58666	5.22923	8.15035	2.17954e-11	1.88613	up
WBGene00004932	sod-3	97	67	117	319	367	455	3.22679	1.93004	3.23515	9.28316	10.0276	12.6654	2.14815e-11	1.61643	up
WBGene00015366	C03A7.2	0	6	10	147	79	94	0	0.14504	0.230055	3.61205	1.80588	2.19625	1.90147e-11	3.29995	up
WBGene00018763	F53F10.1	253	303	394	913	901	713	8.45412	8.87893	10.9672	26.6254	24.6983	19.9046	1.79592e-11	1.05931	up
WBGene00018153	F37C12.10	61	64	83	294	306	247	3.34028	3.03916	3.77582	14.0307	13.7105	11.2894	1.5852e-11	1.62475	up
WBGene00195081	C04F6.7	32	18	12	142	170	254	0.582959	0.289826	0.18444	2.28645	2.55799	3.90674	1.53367e-11	2.5518	up
WBGene00019968	R08F11.4	104	82	86	362	478	294	2.34009	1.61122	1.60822	7.15686	8.86973	5.56401	1.5154e-11	1.63785	up
WBGene00017502	F16B3.2	17	18	12	113	159	139	1.10516	1.03889	0.644815	6.51454	8.57103	7.65176	1.5068e-11	2.51946	up
WBGene00021785	Y51H7C.7	653	796	686	398	272	466	33.4657	35.7439	29.2797	17.7782	11.4086	19.9197	1.50312e-11	-1.23085	down
Caenorhabditis_elegans_newGene_712	-	229	215	286	658	634	655	3.20084	2.63215	3.33977	8.09339	7.30708	7.73665	1.32697e-11	1.05617	up
WBGene00021624	Y47D7A.12	211	156	174	51	19	52	8.63134	5.5897	5.91072	1.81467	0.620732	1.7461	9.98388e-12	-2.32069	down
WBGene00021951	srt-24	0	0	6	101	71	70	0	0	0.121411	2.28006	1.48881	1.50408	9.8225e-12	3.72565	up
WBGene00001751	gst-3	191	240	226	720	546	637	6.94375	7.63809	6.84155	22.8347	16.2723	19.3492	9.51759e-12	1.17132	up
WBGene00003652	nhr-62	228	320	276	643	807	785	3.80553	4.68501	3.84345	9.39554	11.0499	11.0165	8.70182e-12	1.07793	up
WBGene00009404	F35C11.5	299	329	403	131	124	197	6.54626	6.3142	7.35351	2.50844	2.21542	3.59825	8.46168e-12	-1.4859	down
WBGene00008511	F01G10.9	401	331	433	203	214	156	6.77818	4.89135	6.09145	2.99197	2.95187	2.19912	8.33215e-12	-1.34356	down
WBGene00009983	cut-2	6589	11925	12435	4794	4441	4421	187.963	298.856	295.395	112.937	103.421	105.467	8.31958e-12	-1.46515	down
WBGene00009291	clec-264	123	118	244	641	615	525	2.82251	2.3753	4.67133	12.8787	11.5895	10.0908	7.4636e-12	1.50481	up
WBGene00003474	mtl-2	105	173	195	465	537	558	8.39603	12.0902	12.9799	32.4348	35.2221	37.3167	6.43429e-12	1.35739	up
WBGene00009921	F52B5.2	414	476	532	289	271	294	9.1283	9.21549	9.77151	5.55425	4.90285	5.41817	6.25869e-12	-1.06235	down
WBGene00043302	F32D8.11	218	130	198	639	679	566	8.84318	4.69031	6.75077	22.9185	22.8554	19.4574	5.50732e-12	1.39355	up
WBGene00001767	gst-19	95	90	105	308	400	353	3.96011	3.28188	3.64563	11.213	13.6885	12.291	5.50118e-12	1.47926	up
WBGene00004443	rpl-29	5346	7926	7186	2906	3836	4038	620.063	806.198	694.712	293.629	365.321	391.785	4.96438e-12	-1.24161	down
WBGene00013836	fbxa-29	55	61	126	436	302	436	1.54615	1.5084	2.95752	10.7201	6.96347	10.2583	4.85438e-12	1.87152	up
WBGene00008599	F09A5.2	200	316	296	719	718	811	1.89924	2.62632	2.34131	5.96108	5.58802	6.43038	4.76385e-12	1.11458	up
WBGene00010320	F59B10.4	229	192	218	594	597	664	5.5911	4.08608	4.44746	12.6799	11.9555	13.6019	4.61674e-12	1.1645	up
WBGene00008388	D1086.1	59	35	36	259	286	213	2.3188	1.18855	1.18421	8.97688	9.31284	7.07255	4.26592e-12	2.05654	up
WBGene00009677	F44A6.5	192	196	246	854	686	521	5.48383	4.90953	5.85674	21.3274	16.0824	12.4432	3.8008e-12	1.32977	up
WBGene00000778	cpn-2	485	547	586	364	303	313	18.1075	14.7815	18.2378	10.0959	9.21708	9.7092	3.76201e-12	-1.05218	down
WBGene00015599	fbxa-164	0	0	0	63	59	45	0	0	0	1.36273	1.20494	0.941574	3.54564e-12	4.23008	up
WBGene00017818	F26D11.1	255	330	315	839	735	752	8.90583	10.1096	9.18435	25.645	21.0965	21.9846	3.499e-12	1.01469	up
WBGene00010403	otpl-8	156	212	265	49	88	44	2.1044	2.52046	2.98646	0.575458	0.976237	0.498638	3.3777e-12	-2.03206	down
WBGene00018370	F42H10.6	514	603	580	232	323	368	23.3426	23.9995	22.1118	9.19009	12.0373	13.9761	3.17355e-12	-1.20565	down
WBGene00021215	Y18H1A.11	41	43	35	216	200	230	1.26674	1.17471	1.2167	5.8891	5.53733	7.20225	2.82333e-12	1.98466	up
WBGene00023489	F42A10.9	430	478	425	191	231	271	23.0609	22.4373	18.9594	8.89668	10.1432	12.1342	2.74508e-12	-1.27088	down
WBGene00016180	C28C12.4	390	503	641	250	289	164	12.3595	13.9651	16.897	6.89973	7.48241	4.32583	2.72695e-12	-1.42499	down
WBGene00022309	rpc-11	498	668	556	223	350	327	31.481	37.0571	29.2797	12.288	18.1027	17.2491	2.3444e-12	-1.26135	down
WBGene00008712	F11E6.9	260	329	466	150	172	117	11.1651	12.3783	16.6868	5.60206	6.05634	4.18526	2.33031e-12	-1.55017	down
WBGene00008492	F01D5.1	627	534	694	280	415	339	29.5565	22.0799	27.2362	11.5123	16.0166	13.3578	2.21985e-12	-1.1761	down
WBGene00021268	capa-1	486	373	431	1137	1145	1072	20.8393	14.0115	15.3624	42.5332	40.2325	38.3956	2.16579e-12	1.00872	up
WBGene00000062	acr-23	311	391	369	176	202	147	5.12867	5.71476	5.09982	2.52616	2.74847	2.01445	2.01055e-12	-1.34525	down
WBGene00022487	fbxa-21	34	17	16	160	258	172	1.0962	0.459445	0.422961	4.52636	6.84112	4.65395	1.85264e-12	2.53116	up
WBGene00008027	scl-5	368	292	227	885	1047	960	14.6795	10.2061	7.55298	30.8809	34.2993	32.0592	1.83011e-12	1.30709	up
WBGene00006955	wrt-9	463	590	652	334	268	355	6.22338	6.95355	7.30225	3.91454	2.95148	3.98607	1.74684e-12	-1.15145	down
WBGene00219376	C28G1.10	64	115	75	391	330	370	2.02671	3.21269	2.00212	10.9455	8.67852	9.92704	1.71538e-12	1.69923	up
WBGene00016849	acs-21	166	241	315	657	792	726	2.78993	3.56115	4.42978	9.67551	10.9574	10.2417	1.6715e-12	1.2367	up
WBGene00194815	Y43F8B.23	15	11	7	166	116	116	0.577356	0.339603	0.209825	5.56952	3.6394	3.71427	1.62644e-12	2.87167	up
WBGene00015055	pitr-3	114	152	163	466	527	411	1.94849	2.27347	2.31853	6.96141	7.40063	5.86837	1.61608e-12	1.3403	up
Caenorhabditis_elegans_newGene_1566	-	346	279	334	960	791	917	10.2958	7.2803	8.2975	24.9633	19.5623	22.8803	1.55877e-12	1.10808	up
WBGene00010043	F54C9.7	263	419	349	800	1048	1061	6.7971	9.49282	7.51276	18.0383	22.2081	22.9051	1.50723e-12	1.13641	up
WBGene00001723	grl-14	22	34	52	188	248	226	0.401911	0.541476	0.775323	2.98752	3.71049	3.44818	1.49348e-12	2.1553	up
WBGene00007807	C29F3.7	608	686	875	449	506	393	9.82873	9.80875	11.7795	6.35231	6.70431	5.3001	1.47891e-12	-1.01367	down
WBGene00004787	sft-1	623	866	663	427	400	453	16.52	20.2478	14.6931	10.0288	8.88891	10.2184	1.4625e-12	-1.08143	down
WBGene00016147	cyp-32A1	23	54	93	722	665	730	0.369444	0.772265	1.25944	10.3479	8.95326	10.0069	1.41617e-12	2.95203	up
WBGene00001950	hlh-3	419	473	485	178	265	265	14.2075	14.0413	13.6899	5.26212	7.34909	7.48272	1.28286e-12	-1.28324	down
WBGene00004497	rps-28	5393	7274	6787	2788	3965	3911	563.484	666.012	590.522	254.194	339.57	341.248	1.27179e-12	-1.1922	down
WBGene00007131	pals-26	28	14	8	481	658	305	0.453715	0.203781	0.104902	7.01146	9.01254	4.24922	1.2296e-12	3.60498	up
WBGene00003700	nhr-110	151	160	219	506	578	527	2.86098	2.65315	3.44682	8.4295	9.19962	8.48285	1.20228e-12	1.24066	up
WBGene00269434	sqst-5	152	152	148	427	531	502	6.52992	5.71578	5.30723	16.0203	18.7501	18.0453	9.86216e-13	1.31143	up
WBGene00023485	ttr-49	192	191	155	634	607	518	7.74025	6.75	5.19743	22.3445	20.0841	17.475	9.73436e-13	1.32416	up
WBGene00007680	maa-1	172	113	178	501	602	535	5.18617	2.99488	4.46127	13.2137	14.9092	13.5056	8.22777e-13	1.43395	up
WBGene00004490	rps-21	12804	17421	15905	5873	8584	8600	1040.58	1240.65	1076.42	416.433	571.798	583.69	8.09535e-13	-1.31909	down
WBGene00016862	cest-32	358	570	457	1187	1224	1131	5.78635	8.07093	6.143	16.7374	16.2183	15.2659	8.03041e-13	1.00105	up
WBGene00016364	nhr-161	144	105	113	505	400	507	3.68114	2.35376	2.2964	11.3097	8.41025	10.8027	7.9016e-13	1.56009	up
WBGene00004456	rpl-43	17716	24735	22979	8879	12206	12786	1409.44	1773.01	1565.91	631.182	815.415	871.186	7.40179e-13	-1.26925	down
WBGene00004380	rnf-1	63	69	110	345	423	296	1.27998	1.23106	1.8651	6.17104	7.11171	5.0568	7.01075e-13	1.7368	up
WBGene00006163	str-112	20	37	7	253	220	185	0.502775	0.811752	0.136653	5.61148	4.58498	3.92577	6.52823e-13	2.72107	up
WBGene00007449	C08F8.9	187	201	185	63	68	64	19.7055	18.6138	16.2154	5.73638	5.88164	5.6401	6.31922e-13	-1.83238	down
WBGene00012492	fbxb-7	12	14	8	147	105	146	0.298321	0.317306	0.168238	3.33864	2.24047	3.18013	6.02175e-13	2.86061	up
Caenorhabditis_elegans_newGene_1705	-	0	0	0	67	60	52	0	0	0	1.27676	1.02279	0.905365	6.00079e-13	4.3423	up
WBGene00001779	gst-31	97	55	101	359	359	455	4.10078	2.04784	3.57132	13.3641	12.5301	16.1891	5.59459e-13	1.792	up
WBGene00008515	F02C12.1	371	316	487	1203	1096	942	3.9809	2.97169	4.35612	11.2773	9.64875	8.45431	5.57171e-13	1.10734	up
WBGene00021220	Y19D10A.5	65	67	112	322	351	359	1.22779	1.12738	1.78805	5.41121	5.54743	5.79008	5.48007e-13	1.68828	up
WBGene00019744	M02H5.8	170	165	179	485	546	531	10.8482	9.25117	9.56663	27.4239	28.6397	28.477	4.83103e-13	1.23176	up
WBGene00011056	R06B9.5	57	125	81	356	392	473	5.60835	10.9356	6.69574	31.0067	32.1082	39.4674	4.81159e-13	1.8056	up
WBGene00012483	coa-5	616	621	611	375	414	355	31.8478	28.1659	26.2936	16.9338	17.5588	15.3278	4.79163e-13	-1.03242	down
WBGene00017961	nhr-180	127	146	206	484	535	536	2.84963	2.88386	3.8493	9.50315	9.87853	10.0906	4.41964e-13	1.33507	up
WBGene00195063	coa-1	790	753	719	396	476	504	40.8136	35.1834	32.074	17.7651	20.9138	23.3215	4.31857e-13	-1.06036	down
WBGene00023068	rpl-41.2	15074	22034	19704	7110	9947	10167	1459.83	1869.9	1589.16	600.839	789.528	822.3	3.13709e-13	-1.37472	down
WBGene00015272	C01B4.8	80	68	114	343	364	369	1.53866	1.29372	1.82853	5.75989	5.93443	6.12577	2.97011e-13	1.64552	up
WBGene00016425	C34H4.2	156	177	232	570	596	540	2.84336	2.82235	3.52097	9.07032	8.90949	8.22564	2.73577e-13	1.23422	up
WBGene00011293	R102.6	120	92	113	376	474	398	2.87368	1.91293	2.24656	7.86677	9.31367	7.963	2.60944e-13	1.54273	up
WBGene00006310	sul-3	186	160	197	517	651	547	2.48061	1.86729	2.19171	6.03942	7.1391	6.10535	2.54352e-13	1.28322	up
WBGene00020049	ttr-8	254	309	240	815	817	697	14.8505	15.8339	11.7097	41.6924	39.2333	34.0854	2.40202e-13	1.16656	up
WBGene00000798	crn-5	740	833	932	486	632	445	27.5089	27.1332	28.8543	15.7727	19.2447	13.8237	2.36561e-13	-1.015	down
WBGene00007507	C10C5.3	30	39	36	205	254	182	0.58714	0.668757	0.584406	3.55655	4.14551	3.03293	2.03783e-13	2.14379	up
WBGene00009485	F36G9.3	71	115	158	486	415	509	1.26958	1.81133	2.36902	7.64644	6.14376	7.68087	1.96114e-13	1.65905	up
WBGene00018261	cyp-33C5	72	90	108	303	412	377	1.28783	1.41745	1.66019	4.7674	6.36745	5.67191	1.93518e-13	1.62589	up
WBGene00019654	cest-28	112	126	109	431	436	382	1.83927	1.8096	1.49215	6.19969	5.88253	5.25698	1.69209e-13	1.46165	up
WBGene00007362	cyp-35C1	160	237	244	74	62	73	2.8893	3.74763	3.6788	1.15763	0.906721	1.08901	1.68903e-13	-1.87479	down
WBGene00001539	gcy-13	13	9	16	144	139	126	0.113447	0.071005	0.117774	1.12847	1.01901	0.945457	1.65838e-13	2.79246	up
WBGene00008401	D2005.6	504	591	685	319	399	340	8.02934	8.24854	9.0801	4.42801	5.20376	4.5218	1.61026e-13	-1.07918	down
WBGene00010439	JC8.7	724	784	687	474	468	419	16.4507	15.9906	13.1026	9.79158	8.72097	7.96401	1.4884e-13	-1.03081	down
WBGene00010630	ttll-15	257	310	387	844	1159	797	4.09231	4.32174	5.13335	11.7361	15.1293	10.5978	1.46406e-13	1.19383	up
WBGene00020449	fbxa-54	164	160	206	515	535	620	3.80434	3.25428	3.98668	10.4641	10.2109	12.067	1.37717e-13	1.28839	up
WBGene00010771	K11D2.5	571	601	710	361	435	357	12.3054	11.3486	12.7579	6.79374	7.69302	6.41999	1.34229e-13	-1.04038	down
WBGene00006440	tag-63	640	593	733	373	331	428	8.38761	6.81109	8.0052	4.26002	3.55477	4.68629	1.32863e-13	-1.1268	down
WBGene00004984	spn-4	346	390	439	172	222	200	6.28134	6.21637	6.60217	2.70292	3.28511	3.01127	1.3018e-13	-1.30465	down
WBGene00004183	prk-2	535	672	647	267	371	384	8.69745	9.56949	8.76721	3.79058	4.94762	5.21589	1.27201e-13	-1.18728	down
WBGene00011707	T11B7.2	301	389	392	158	177	188	29.3498	33.2395	31.7964	13.3635	14.1124	15.2348	1.26707e-13	-1.36311	down
WBGene00007932	zip-5	229	267	280	897	886	610	7.37946	7.42284	7.37301	25.2256	23.2926	16.3188	1.14147e-13	1.25811	up
WBGene00013748	ssu-1	180	149	237	627	693	552	4.0197	2.92857	4.41061	12.2725	12.7283	10.3377	1.08463e-13	1.35436	up
WBGene00007669	C18D1.2	18	41	19	231	172	244	0.335778	0.684821	0.300087	3.89653	2.71798	3.93922	1.05867e-13	2.51384	up
Caenorhabditis_elegans_newGene_76	-	0	3	0	89	84	62	0	0.026163	0	0.835862	0.739966	0.554511	1.03868e-13	4.13825	up
WBGene00009809	F47B8.8	69	115	121	500	353	442	2.45526	3.57878	3.57763	15.5902	10.349	13.1866	8.91141e-14	1.7013	up
WBGene00018256	cutl-28	291	378	467	128	164	189	3.5229	4.00987	4.70683	1.35355	1.62256	1.90932	7.59482e-14	-1.53554	down
WBGene00018966	F56D2.5	120	128	143	388	493	480	1.89859	1.77526	1.88703	5.3563	6.39185	6.3453	7.25766e-14	1.42107	up
WBGene00044746	C53H9.3	336	408	365	147	174	195	28.9374	30.8038	26.0927	10.7406	12.176	13.984	6.94763e-14	-1.42139	down
WBGene00021157	Y4C6B.3	162	97	222	686	705	586	2.81943	1.47325	3.46248	11.1781	10.2744	8.8348	6.64046e-14	1.64765	up
WBGene00020396	T10B5.10	617	786	906	515	443	396	13.6379	15.2417	16.6963	9.92541	8.02265	7.30831	6.56779e-14	-1.09244	down
WBGene00016796	cec-2	260	282	276	678	761	835	2.70701	2.52192	2.28569	6.04322	6.33465	7.39044	6.52903e-14	1.11111	up
WBGene00007185	nlp-36	1392	1846	1654	712	1110	1134	109.287	126.993	108.103	48.7441	71.416	74.3026	6.39988e-14	-1.06173	down
WBGene00016517	nhr-260	115	120	179	476	490	479	2.66645	2.4261	3.44739	9.62639	9.31143	9.27595	5.7871e-14	1.43424	up
WBGene00011424	dhs-31	83	35	48	311	420	341	2.41673	0.876644	1.14857	7.9448	10.0735	8.32657	4.97212e-14	2.19303	up
WBGene00019885	R05D8.7	143	153	177	446	544	569	4.22739	3.97133	4.35867	11.5534	13.2261	14.1033	4.62568e-14	1.34906	up
WBGene00011798	T16G1.4	23	84	95	1223	1294	1080	0.4419	1.45117	1.56644	21.1567	21.016	17.8772	4.39015e-14	3.33658	up
WBGene00194869	K01A6.8	4	6	12	90	185	119	0.255616	0.421026	0.801765	6.37997	12.3784	8.13993	4.05737e-14	3.31207	up
WBGene00021931	znf-782	819	1185	1238	665	613	745	11.3186	14.3582	14.2694	8.02731	6.94345	8.61613	3.7986e-14	-1.00464	down
WBGene00003693	nhr-103	187	218	196	590	648	570	4.38286	4.46367	3.81346	12.0692	12.4579	11.1482	3.74361e-14	1.22023	up
WBGene00015476	C05D9.9	138	159	139	544	527	439	4.97751	5.01491	4.1689	17.8066	15.9812	13.2962	3.57733e-14	1.41243	up
WBGene00014111	rpc-25	853	910	768	527	532	518	28.8173	26.964	21.6065	15.5285	14.7404	14.6026	3.28607e-14	-1.02645	down
WBGene00007134	pals-28	3	2	0	61	129	86	0.065414	0.030728	0	1.15442	2.31618	1.5735	3.14151e-14	4.04452	up
WBGene00017618	F20A1.6	307	294	332	738	904	947	15.8856	13.4094	13.9583	33.8614	36.0739	37.5923	3.00149e-14	1.10808	up
WBGene00003080	lsm-6	531	620	655	243	371	343	41.5488	42.5161	42.6991	16.5529	23.7624	22.3737	2.91245e-14	-1.24315	down
WBGene00009839	fbxa-188	32	20	26	258	266	145	0.807713	0.432862	0.550133	5.76101	5.57933	3.09229	2.73657e-14	2.5464	up
WBGene00015056	B0222.5	222	189	209	616	622	723	4.05169	3.02281	3.17358	9.81132	9.30771	11.0171	2.68071e-14	1.28573	up
WBGene00020052	R13A5.10	556	614	676	339	372	405	27.5207	26.6198	27.8889	14.65	15.0939	16.7212	2.56954e-14	-1.05883	down
WBGene00015758	nhr-155	192	162	196	729	552	598	4.66727	3.46121	3.97625	15.5218	11.0316	12.1903	2.25605e-14	1.39545	up
WBGene00004099	abu-15	352	690	616	161	246	245	7.8896	13.5682	11.5065	3.1427	4.52064	4.58582	2.14556e-14	-1.63392	down
WBGene00235352	ZK250.13	271	479	298	1272	1042	1144	3.41713	5.57445	3.34448	13.9701	11.0008	11.9279	2.0256e-14	1.35341	up
WBGene00010520	cpx-2	391	365	432	900	1112	1073	20.2736	16.5423	18.6466	40.6981	47.2512	46.4315	2.00718e-14	1.01601	up
WBGene00000465	cpg-1	56	45	50	243	279	281	0.823561	0.568287	0.611735	3.11875	3.35685	3.45247	1.97542e-14	1.97241	up
WBGene00007275	C03D6.1	468	373	365	153	194	160	14.6694	10.2644	9.54428	4.17049	4.97716	4.18653	1.78326e-14	-1.57422	down
WBGene00007835	oac-7	35	66	63	373	282	265	0.426055	0.71436	0.652547	4.04586	2.86892	2.75428	1.70562e-14	2.06149	up
WBGene00015063	B0228.6	248	182	197	765	809	624	7.78896	5.00911	5.14592	21.0127	20.8807	16.407	1.60411e-14	1.41837	up
WBGene00009642	F42G4.5	868	787	1083	411	446	614	24.1782	19.2251	25.147	10.3055	10.1607	14.284	1.50164e-14	-1.22179	down
WBGene00012460	dhps-1	634	700	796	337	417	474	14.2263	13.77	14.8771	6.60439	7.67605	8.89078	1.49974e-14	-1.12463	down
WBGene00044289	Y37F4.8	100	139	101	463	398	523	4.50929	5.52943	3.80488	18.3749	14.8276	19.8356	1.43363e-14	1.63305	up
WBGene00016150	hint-3	333	343	290	855	1003	886	11.8869	10.6312	8.58575	26.6281	29.3406	26.2847	1.20227e-14	1.13471	up
WBGene00000030	abu-7	233	444	423	116	119	151	4.90904	8.20304	7.42117	2.1319	2.05342	2.64415	1.08892e-14	-1.78107	down
WBGene00017443	F13H8.11	217	235	254	599	730	764	3.49777	3.32142	3.41186	8.44221	9.67407	10.304	1.03314e-14	1.2032	up
WBGene00015273	mct-2	533	683	638	281	404	295	9.34463	10.272	9.03728	4.84936	5.66625	4.22629	1.03068e-14	-1.24817	down
WBGene00019461	K07A3.3	13	13	12	114	163	167	0.220535	0.196589	0.167169	1.76136	2.35824	2.47253	1.01934e-14	2.89827	up
WBGene00015578	C07G3.10	108	75	98	522	455	343	4.19615	2.54745	3.16849	17.7781	14.5643	11.1765	9.62645e-15	1.81445	up
WBGene00013845	fbxa-37	114	120	166	518	459	463	3.21472	2.97553	3.91631	12.8516	10.6861	10.9912	9.35191e-15	1.4771	up
WBGene00013949	ZK262.2	276	329	360	890	836	813	6.60971	6.91173	7.18169	18.6159	16.4276	16.2793	9.18457e-15	1.0427	up
WBGene00004129	pqn-42	341	334	387	889	1119	873	5.70737	4.92469	5.4196	12.9093	15.2873	12.1556	9.1822e-15	1.07758	up
WBGene00021112	W09C3.4	618	831	902	505	455	462	15.8401	18.6811	19.2762	11.2891	9.561	9.89721	9.05271e-15	-1.05049	down
WBGene00007546	nhr-153	162	169	216	558	779	548	3.18989	2.90684	3.53436	9.59475	12.5832	9.02192	8.69134e-15	1.41106	up
WBGene00022415	Y102A11A.5	1039	1818	1908	933	941	909	49.9342	76.5753	76.3973	39.1464	37.0547	36.4763	8.55118e-15	-1.09155	down
WBGene00007068	cTel55X.1	368	505	716	1347	1622	1532	13.2955	15.986	21.5685	42.5023	48.0819	46.2922	7.62028e-15	1.15759	up
WBGene00044661	fbxa-143	32	13	11	235	222	178	0.751789	0.260609	0.214534	4.85565	4.31088	3.50882	7.56173e-15	2.84902	up
WBGene00011894	ttr-23	257	369	280	930	831	929	13.7143	17.1979	12.3415	39.4385	32.9103	38.9524	7.29486e-15	1.20715	up
WBGene00008859	F15D4.2	338	351	449	962	1111	914	15.1778	13.7985	16.7816	37.7415	40.9515	34.3307	7.06998e-15	1.0377	up
WBGene00011539	fbxa-135	12	26	16	252	330	109	0.169546	0.326937	0.193804	3.26937	4.02397	1.34924	6.05135e-15	3.00589	up
WBGene00019589	K09F6.6	126	95	118	468	469	409	1.90395	1.26084	1.48784	6.21888	5.84366	5.197	6.01894e-15	1.59407	up
WBGene00013852	hhat-1	893	1530	1635	834	605	654	14.7037	22.0753	22.4153	11.9777	8.15625	8.98422	5.84654e-15	-1.26097	down
WBGene00008302	pals-38	26	27	14	249	337	138	0.533159	0.481851	0.241615	4.50678	5.73155	2.37809	5.58776e-15	2.80901	up
WBGene00006520	egli-1	506	624	641	276	306	372	15.2841	16.5193	16.1357	7.26812	7.56646	9.37626	5.46567e-15	-1.21761	down
WBGene00019593	K09F6.10	268	275	353	831	870	762	3.04007	2.83215	3.36438	8.98649	8.87477	7.86381	5.44346e-15	1.10282	up
WBGene00013950	txt-8	540	527	428	1361	1393	1322	14.1123	12.0849	9.31468	31.0606	29.8753	28.8824	5.04233e-15	1.07549	up
WBGene00000236	bag-1	751	687	770	448	479	425	29.1085	23.3214	24.828	15.123	15.2179	13.7458	4.97899e-15	-1.04868	down
WBGene00019961	R08E5.1	45	27	24	212	255	273	1.10929	0.580549	0.483775	4.6834	5.25301	5.70082	4.66483e-15	2.42185	up
WBGene00021213	Y18H1A.9	748	890	1196	606	492	509	11.4913	11.9821	15.3	8.12656	6.19393	6.52379	4.36473e-15	-1.13645	down
WBGene00000220	atf-2	741	1087	1345	640	570	538	14.6243	18.8156	22.113	11.0172	9.22415	8.87511	4.31852e-15	-1.17266	down
Caenorhabditis_elegans_newGene_2009	-	21	4	4	207	196	149	0.264224	0.061005	0.032648	2.81887	2.26347	2.02141	4.25958e-15	3.36365	up
WBGene00044206	T26H5.9	12	7	6	107	162	140	0.935795	0.438573	0.377225	7.32609	10.4785	9.21259	4.04341e-15	3.23673	up
WBGene00017332	ugt-37	57	68	86	322	334	306	0.914205	0.95924	1.14826	4.53944	4.42206	4.12674	4.00037e-15	1.79161	up
WBGene00017331	ugt-40	189	200	211	681	740	537	3.03494	2.80772	2.82469	9.54421	9.74524	7.21003	3.6473e-15	1.33436	up
WBGene00022488	orc-3	614	725	712	387	455	423	8.94808	9.28992	8.67547	4.92818	5.44754	5.16143	3.56492e-15	-1.03372	down
WBGene00015693	ugt-28	185	188	223	641	579	621	2.96325	2.6354	2.96767	8.95251	7.59837	8.30959	3.06924e-15	1.2635	up
WBGene00010072	F54F12.1	15	28	27	189	253	163	0.10043	0.163593	0.14972	1.10651	1.39576	0.916612	2.96987e-15	2.58418	up
WBGene00015710	C12D5.9	424	424	434	173	225	217	10.0345	8.80621	8.5573	3.57234	4.37066	4.28289	2.95505e-15	-1.38669	down
WBGene00016219	pals-24	148	299	265	846	1068	740	4.53446	8.01281	6.76072	22.6387	26.8355	18.937	2.63419e-15	1.52904	up
WBGene00003692	nhr-102	252	254	293	722	756	739	5.11911	4.52216	4.95486	12.7979	12.5957	12.5425	2.52049e-15	1.11257	up
WBGene00012091	pals-29	0	0	0	67	112	55	0	0	0	1.28603	2.0167	1.00378	2.49503e-15	4.67176	up
WBGene00004498	rps-29	4873	6878	6287	2019	2961	2948	382.579	473.202	411.033	138.292	190.522	193.269	2.46171e-15	-1.49749	down
WBGene00005602	srj-14	46	76	71	283	352	325	1.18662	1.74047	1.54311	6.48418	7.58761	7.14105	2.44867e-15	1.90541	up
WBGene00020995	W03F8.6	122	157	180	608	583	460	6.22844	5.91024	6.70688	25.5451	23.2983	18.8105	2.36047e-15	1.47697	up
WBGene00077775	nlp-58	306	371	390	929	993	856	14.4121	15.2955	15.2757	38.175	38.3357	33.6771	2.16328e-15	1.02654	up
WBGene00021978	Y58A7A.4	20	56	38	257	282	268	0.197247	0.489069	0.314183	2.25264	2.32293	2.25452	2.11691e-15	2.35324	up
WBGene00011839	T19C4.5	318	384	490	1063	1193	974	7.36485	7.81607	9.48302	21.5774	22.7711	18.9221	1.84462e-15	1.08801	up
WBGene00013484	Y69H2.9	50	94	93	375	399	348	0.831396	1.38479	1.29954	5.53845	5.53996	4.9164	1.75873e-15	1.84753	up
Caenorhabditis_elegans_newGene_1303	-	358	419	348	1019	1052	963	7.78058	6.96675	5.52913	17.2057	16.635	15.6863	1.73059e-15	1.06834	up
WBGene00014092	ZK822.5	719	666	779	2061	1975	1515	10.8295	8.78943	10.1623	27.1617	24.4778	19.0625	1.68621e-15	1.00012	up
WBGene00006952	wrt-6	702	910	1109	505	598	456	10.0004	11.355	13.1544	6.26839	6.97467	5.42266	1.6718e-15	-1.12651	down
WBGene00007616	rpoa-12	554	788	695	293	401	377	30.1302	38.0284	31.8428	13.2557	17.4777	17.3474	1.61365e-15	-1.25358	down
WBGene00044761	pals-19	179	181	255	630	635	703	5.21749	4.60343	6.13938	15.9873	15.1734	17.0766	1.46845e-15	1.31687	up
WBGene00018614	pals-31	0	6	11	165	202	86	0	0.185924	0.375522	5.94843	6.84817	2.978	1.42685e-15	3.71698	up
WBGene00020855	hpo-36	853	1180	1561	628	602	737	8.7093	10.5939	13.3725	5.64447	5.10056	6.2533	1.41747e-15	-1.18184	down
WBGene00018262	cyp-33C3	377	218	281	1015	1275	1005	5.84223	2.96122	3.62536	13.7501	16.2206	13.0272	1.32875e-15	1.50963	up
WBGene00013268	tric-1B.2	886	867	1070	484	461	646	17.1045	14.6688	17.1982	8.15238	7.28645	10.4057	1.2864e-15	-1.15686	down
WBGene00016762	ugt-24	277	306	192	1002	1010	814	4.68656	4.45146	2.6806	14.8457	14.0748	11.4623	1.28445e-15	1.47388	up
WBGene00015286	best-3	289	349	329	842	1002	823	4.04738	4.28485	3.8376	10.2925	11.5107	9.63299	1.24298e-15	1.103	up
WBGene00005582	sri-70	230	263	292	95	63	94	6.52178	6.53842	6.89414	2.33243	1.45971	2.20846	1.18958e-15	-1.91054	down
WBGene00017360	F10E9.11	452	518	534	262	296	239	24.0619	24.214	23.6922	12.1512	12.9362	10.6408	1.05377e-15	-1.24482	down
WBGene00008810	cyp-13A12	62	97	129	431	475	392	0.994638	1.36848	1.72223	6.07016	6.27558	5.2819	1.03041e-15	1.78717	up
WBGene00015225	B0507.8	2	9	13	655	1099	323	0.042182	0.157799	0.219468	12.4496	19.6091	5.87506	9.64683e-16	4.49207	up
WBGene00020047	ttr-32	75	63	92	343	402	326	3.5106	2.59935	3.57982	14.1153	15.5356	12.8212	9.39966e-16	1.81464	up
WBGene00017567	F18E3.11	225	397	392	916	1397	1118	15.4631	23.8932	22.4155	54.9568	78.7474	64.2272	9.35672e-16	1.3971	up
WBGene00020153	nhr-212	184	141	88	705	680	650	3.91882	2.64407	1.57193	13.2068	11.969	11.6603	8.2438e-16	1.86323	up
WBGene00020276	T05H4.15	146	132	150	513	744	474	3.03741	2.38524	2.59493	9.36758	12.7434	8.27492	8.11302e-16	1.62048	up
WBGene00000882	cyn-6	3117	4576	5318	1474	1814	2037	122.222	157.179	173.619	50.3928	58.3839	66.7366	7.27862e-16	-1.58334	down
WBGene00012776	Y42A5A.1	837	626	817	1910	2138	1879	6.66448	4.37035	5.41682	13.2788	13.966	12.5069	6.95778e-16	1.01304	up
WBGene00016728	C46H11.2	385	542	634	1311	1417	1316	7.81249	9.65461	10.7324	23.2555	23.6087	22.3444	6.74148e-16	1.02858	up
WBGene00009636	F42F12.4	250	347	345	909	899	827	11.2172	13.5253	12.9491	35.7868	33.3921	31.2679	5.36768e-16	1.13069	up
WBGene00020554	T19A5.3	1860	3002	3429	1831	1669	1529	20.4064	28.8266	31.4003	17.5506	14.9911	13.9872	5.29009e-16	-1.03847	down
WBGene00002200	kin-16	709	597	607	1700	1734	1569	11.9053	8.73456	8.60653	24.8788	24.1422	22.2129	5.01464e-16	1.01897	up
WBGene00011190	swt-6	31	31	17	222	194	306	1.0059	0.935399	0.474308	6.89681	5.64131	9.07431	4.27697e-16	2.64172	up
WBGene00004798	sip-1	14	44	55	266	449	276	0.603662	1.63953	1.96462	10.0588	15.9556	9.97958	3.85263e-16	2.6266	up
WBGene00010795	M01A8.1	105	154	86	501	595	486	3.00032	3.91791	2.03917	13.2355	14.3418	12.2822	3.52441e-16	1.78815	up
WBGene00021796	Y52E8A.3	263	297	302	807	815	762	12.6087	12.4444	12.0514	33.887	32.194	30.6215	3.25013e-16	1.109	up
WBGene00018466	F45E1.5	207	260	280	712	785	692	2.7992	3.07882	3.14547	8.3997	8.69433	7.80565	3.22185e-16	1.19365	up
WBGene00017738	tipn-1	440	438	601	239	255	232	13.8157	12.041	15.7193	6.54359	6.5697	6.0762	3.20426e-16	-1.34578	down
WBGene00189958	F45H11.8	614	685	716	368	289	400	58.6344	57.2728	56.9175	30.6658	22.6232	31.8739	3.05162e-16	-1.25646	down
WBGene00001778	gst-30	32	35	21	226	228	228	1.22779	1.17461	0.659522	7.61916	7.21901	7.36494	3.00459e-16	2.4501	up
WBGene00007368	C06B8.2	132	107	184	488	629	581	2.62893	1.87295	3.13089	8.65829	10.3566	9.38582	3.00452e-16	1.62277	up
WBGene00015220	B0507.3	237	333	292	793	908	816	4.65515	5.76122	4.91092	13.3319	14.4882	13.2454	2.76982e-16	1.18632	up
WBGene00000983	dhs-20	333	292	350	825	1071	966	6.34575	4.87267	5.54956	13.7129	16.7306	15.3673	2.68473e-16	1.186	up
WBGene00011158	chil-16	0	0	0	54	108	90	0	0	0	0.968091	1.82721	1.54228	2.62009e-16	4.7903	up
WBGene00044471	F56D6.9	0	0	0	106	101	51	0	0	0	10.9251	9.76438	5.01225	2.11708e-16	4.80605	up
WBGene00018159	F37F2.2	920	916	936	485	580	621	50.686	44.231	42.9545	23.2726	26.2114	28.5214	1.88389e-16	-1.05931	down
WBGene00016507	abhd-5.2	319	310	344	997	955	819	6.11896	5.21251	5.52947	16.7368	15.0119	13.1143	1.87018e-16	1.14774	up
WBGene00012540	Y37A1B.7	580	972	1060	430	436	440	25.0552	36.7907	38.124	16.1938	15.4391	15.8835	1.7653e-16	-1.30914	down
WBGene00009131	F25H8.1	667	682	786	444	390	423	16.9896	15.3391	16.6719	9.92681	8.14533	9.0198	1.66839e-16	-1.09744	down
WBGene00012959	Y47H10A.3	4	9	3	122	178	101	0.081012	0.198349	0.044687	2.8272	3.8663	2.23504	1.61589e-16	3.67341	up
WBGene00021743	Y50D4B.4	1188	1126	1238	691	701	855	13.5616	11.4671	12.3149	6.80024	6.78557	8.54781	1.42741e-16	-1.00233	down
WBGene00010893	cutl-9	495	557	640	316	235	281	7.57532	7.46972	8.1599	4.2145	2.94373	3.59272	1.36724e-16	-1.34241	down
WBGene00007421	C07H4.1	140	147	155	533	589	467	5.71436	5.25586	5.24427	19.3643	19.8914	16.1267	1.31184e-16	1.46899	up
WBGene00007855	C31H5.4	58	60	85	299	347	378	4.8194	4.41245	5.95748	21.9608	23.8911	26.5592	1.17793e-16	1.92869	up
WBGene00018422	F44E2.9	547	532	594	219	318	279	31.4071	26.7323	28.3869	10.9254	14.94	13.3509	9.30168e-17	-1.36564	down
WBGene00003646	nhr-56	227	265	262	710	750	731	4.34883	4.45492	4.18011	11.9562	11.8708	11.8823	9.10296e-17	1.1784	up
WBGene00016129	C26B2.7	728	789	752	403	481	463	32.3347	30.7277	27.7858	15.58	17.5066	17.2027	8.77554e-17	-1.09259	down
WBGene00012635	Y38H8A.1	313	397	548	130	163	179	8.63539	9.59057	12.6013	3.11402	3.68812	4.11139	8.213e-17	-1.70248	down
WBGene00003037	lin-54	829	905	836	555	505	500	15.1868	14.4972	12.6903	8.82375	7.57569	7.6522	7.76821e-17	-1.06025	down
Caenorhabditis_elegans_newGene_728	-	24	61	35	308	330	261	0.315676	0.70943	0.375951	3.59297	3.59445	2.92427	6.60999e-17	2.43045	up
WBGene00005647	srp-6	411	489	583	1280	1434	1150	8.71969	9.11108	10.3213	23.7461	24.9895	20.4216	6.14508e-17	1.03147	up
WBGene00008052	ctns-1	551	530	493	1484	1440	1289	11.4092	9.63565	8.50852	26.7994	24.2773	22.2749	6.09241e-17	1.0552	up
WBGene00009608	nhr-265	174	246	309	47	74	66	4.59313	5.7183	6.82394	1.07245	1.60236	1.44357	6.00033e-17	-2.19904	down
WBGene00022371	set-29	793	936	1136	585	637	526	17.1631	17.7506	20.4785	11.0558	11.294	9.49947	5.45586e-17	-1.04266	down
WBGene00010004	F53H2.1	10	10	7	140	155	136	0.094861	0.085884	0.057678	1.52206	1.29968	1.40577	5.03577e-17	3.26672	up
WBGene00012810	nceh-1	38	79	54	360	309	359	0.775822	1.4467	0.916043	6.55643	5.30316	6.2535	5.01512e-17	2.15879	up
WBGene00020219	T05A7.1	58	66	78	279	520	374	1.90973	1.88803	2.13235	8.05255	14.109	10.3312	4.82807e-17	2.10586	up
WBGene00001079	dpy-20	729	860	1154	542	502	430	11.6842	12.0868	15.4057	7.57645	6.5907	5.75774	3.81962e-17	-1.21496	down
WBGene00020912	W01A11.7	539	561	782	1624	1707	1474	21.5451	19.3393	25.9772	56.6741	55.8571	49.2775	3.52687e-17	1.00448	up
WBGene00006573	tin-10	637	831	840	273	425	419	45.6308	50.2938	49.1885	17.0028	24.7101	24.4797	3.14292e-17	-1.36929	down
Caenorhabditis_elegans_newGene_536	-	71	73	139	488	567	407	2.63141	2.39538	4.33105	15.9625	17.4211	12.7387	2.62345e-17	1.97055	up
WBGene00012960	Y47H10A.4	514	458	476	177	173	243	11.5166	8.98097	8.88365	3.4443	3.16123	4.54597	2.52074e-17	-1.60715	down
WBGene00086568	Y2H9A.6	0	0	3	151	181	47	0	0	0.064165	4.02371	4.5366	1.20041	2.23786e-17	4.64969	up
WBGene00010334	del-5	330	372	307	896	1073	1034	5.58158	5.51731	4.32661	13.2433	14.8989	14.6302	1.96299e-17	1.20485	up
WBGene00022024	Y64H9A.2	498	604	656	326	280	230	22.6773	24.1093	24.8829	12.9288	10.4544	8.74586	1.82813e-17	-1.39032	down
WBGene00020704	-	389	608	684	169	224	259	6.99712	9.58169	10.2402	2.6506	3.30199	3.89366	1.8231e-17	-1.65951	down
WBGene00007691	cest-8	11	39	63	361	383	321	0.162887	0.516002	0.795164	4.84723	4.82751	4.11891	1.72422e-17	2.73669	up
WBGene00000539	cln-3.1	331	301	320	37	102	84	6.35294	5.0443	5.10962	0.611849	1.63295	1.34204	1.67434e-17	-2.34039	down
WBGene00018708	oac-32	165	182	213	638	623	583	2.13485	2.0505	2.35026	7.21672	6.62849	6.27766	1.63309e-17	1.35581	up
WBGene00000008	aat-7	22	17	27	219	169	264	0.402813	0.271628	0.414642	3.53347	2.55581	4.06994	1.63262e-17	2.76347	up
WBGene00002246	lag-2	499	647	826	254	339	326	11.4564	13.0159	15.8037	5.07911	6.3877	6.25703	1.60787e-17	-1.41293	down
WBGene00014099	ZK836.3	76	166	77	568	655	566	3.4857	6.67637	2.91912	22.7359	24.6638	21.6836	1.50003e-17	2.06365	up
WBGene00016883	C52E2.4	169	183	133	700	635	585	2.0742	2.13476	1.36299	8.14307	6.92702	6.01222	1.48764e-17	1.59449	up
WBGene00011705	clp-9	238	301	302	772	932	793	3.00683	3.19481	3.25447	8.6502	9.76339	8.69404	1.25635e-17	1.21065	up
WBGene00011017	R04F11.5	833	984	791	476	514	393	35.3637	36.6447	27.9778	17.6301	17.8825	13.9218	1.07753e-17	-1.25282	down
WBGene00185092	K08D8.7	96	102	120	467	501	385	2.83791	2.64422	2.95028	12.0848	12.1795	9.53765	9.73747e-18	1.70262	up
WBGene00045275	F18E3.12	71	105	87	400	528	368	4.83102	6.30991	4.96061	23.9761	29.7423	21.1302	8.89366e-18	1.89645	up
WBGene00018138	folt-2	685	784	746	319	359	454	11.5546	11.5862	10.4705	4.69675	4.96562	6.39727	8.60468e-18	-1.29894	down
WBGene00018204	F39F10.4	87	107	159	507	500	499	3.1797	3.44478	4.83844	16.2541	15.0637	15.3083	8.08631e-18	1.7186	up
WBGene00008292	C54C8.4	292	320	466	130	134	95	6.41922	6.15249	8.53755	2.4801	2.40293	1.72877	7.902e-18	-1.86688	down
WBGene00021371	nape-1	348	334	443	968	1074	1099	8.34669	7.02046	8.86439	20.2885	21.1482	22.0521	7.69631e-18	1.12554	up
WBGene00010877	lact-4	490	437	494	1592	1593	1138	10.372	8.10626	8.69404	29.4031	27.6235	20.1158	7.48491e-18	1.23701	up
WBGene00006572	tin-9.1	820	1071	896	218	379	472	66.6175	76.2094	60.6164	15.4281	25.1977	32.036	7.32428e-18	-1.69261	down
WBGene00000211	asm-1	233	245	298	809	847	714	3.52152	3.24486	3.74031	10.6822	10.5049	9.02084	6.83697e-18	1.25098	up
WBGene00010408	mboa-2	1316	993	1283	3379	3459	2752	20.3571	13.4524	16.5157	45.6531	43.9014	35.5844	6.69159e-18	1.05181	up
WBGene00045078	C46C2.7	465	585	544	220	275	274	26.2148	28.8878	25.5061	10.8004	12.6971	12.8573	5.96037e-18	-1.37717	down
Caenorhabditis_elegans_newGene_293	-	10	26	21	193	198	221	0.167071	0.38717	0.301474	2.94511	2.846	3.22576	5.32668e-18	2.87204	up
WBGene00017044	mrpl-18	1252	1426	1495	996	765	869	54.8003	54.6971	54.491	38.0237	27.4114	31.7632	5.19486e-18	-1.00063	down
WBGene00022814	ZK742.4	883	699	715	2174	2022	2351	17.4092	12.0736	11.7341	37.4088	32.6917	38.72	4.83412e-18	1.1393	up
WBGene00010407	scb-1	190	162	142	566	822	705	6.85428	5.26357	4.27492	18.0351	24.9318	21.8332	4.82723e-18	1.67966	up
WBGene00007363	stdh-1	526	658	553	2001	1969	1353	13.1626	14.4415	11.5382	43.7575	40.4381	28.3119	4.27203e-18	1.25064	up
WBGene00016734	C46H11.10	590	503	511	1632	1556	1387	12.8956	9.55663	9.15662	31.1315	27.8471	25.2709	3.88617e-18	1.14302	up
WBGene00005833	srw-86	95	75	120	506	540	383	4.96021	3.45613	5.2505	23.1969	23.2917	16.7974	3.6553e-18	1.8987	up
WBGene00009476	F36F2.2	430	360	378	1184	1276	1068	12.8373	9.42154	9.3986	30.8755	31.2512	26.6468	2.91671e-18	1.22266	up
WBGene00018195	btb-16	243	123	168	845	948	790	6.99811	3.07976	4.02037	21.2228	22.3805	18.999	2.89486e-18	1.85163	up
WBGene00012715	snpc-1.2	483	451	503	236	217	214	8.26799	6.76109	7.16159	3.52132	3.03271	3.04742	2.87823e-18	-1.43399	down
WBGene00003712	nhr-122	215	262	242	901	710	784	5.12784	5.48499	4.82443	18.8152	13.9195	15.6658	2.80289e-18	1.37122	up
WBGene00009395	clec-64	399	467	593	223	169	211	8.93747	9.16906	11.0712	4.36333	3.10708	3.936	2.71838e-18	-1.57785	down
WBGene00002133	inx-11	219	120	165	820	795	709	3.9201	1.87322	2.46541	12.5152	11.6383	10.5887	2.69685e-18	1.79335	up
WBGene00016671	C45G7.4	365	390	434	987	1066	1160	5.26819	4.93364	5.21958	12.4479	12.6197	14.0003	2.69001e-18	1.0786	up
WBGene00022546	ZC196.2	2	0	0	109	97	99	0.050059	0	0	2.53952	2.12616	2.20753	2.51782e-18	4.72564	up
WBGene00008565	acox-1.2	435	592	699	167	288	199	5.9079	7.03996	7.9049	1.97592	3.19946	2.25707	2.22012e-18	-1.69937	down
WBGene00010125	dod-22	168	162	175	590	598	578	3.9871	3.55082	3.46244	12.3386	11.9557	11.4972	2.04313e-18	1.43314	up
WBGene00019498	K07E8.7	697	851	960	477	493	520	14.2027	15.0862	16.2261	8.41917	8.18334	8.77943	2.0381e-18	-1.08129	down
WBGene00017160	F01F1.3	213	212	272	835	943	661	6.91308	6.02303	7.36157	23.6844	25.1209	17.94	1.91359e-18	1.43836	up
WBGene00016719	math-24	103	129	110	515	481	440	2.14484	2.35798	1.90351	9.38042	8.2321	7.66062	1.79405e-18	1.68457	up
WBGene00012123	T28D6.3	164	198	219	612	639	712	7.30182	7.73018	8.15358	23.8944	23.4188	26.6024	1.75423e-18	1.39353	up
WBGene00006447	tag-72	709	867	851	381	520	438	15.5512	16.6655	15.5313	7.28285	9.33797	8.00827	1.72424e-18	-1.19203	down
WBGene00016788	C49G7.10	43	35	60	278	313	303	1.26099	0.901362	1.52024	7.17807	7.61033	7.49264	1.5213e-18	2.25761	up
WBGene00013074	hmit-1.2	170	125	85	1400	1626	1889	2.09125	1.34939	0.867301	15.0685	16.4422	19.4642	1.21362e-18	3.05903	up
WBGene00021587	clec-76	572	557	613	1319	1569	1585	9.7	8.2149	8.64059	19.1238	21.5829	22.224	1.1619e-18	1.00228	up
WBGene00022232	exos-2	708	809	894	420	467	511	18.6997	18.7419	19.6705	9.67882	10.1206	11.2667	1.14772e-18	-1.11905	down
WBGene00003649	nhr-59	103	132	105	515	461	481	1.99809	2.23434	1.71345	8.79112	7.40217	7.95062	1.03109e-18	1.71213	up
WBGene00021256	Y22D7AR.2	67	78	74	397	349	354	0.451954	0.458527	0.412717	2.33657	1.92842	1.99213	1.004e-18	1.9256	up
WBGene00008510	lipl-7	495	456	641	1447	1410	1400	10.3264	8.34371	11.1396	26.3524	24.1233	24.4114	9.87829e-19	1.06699	up
WBGene00008768	F13G3.10	816	1023	971	438	605	533	62.1438	68.4582	61.5056	28.937	37.7221	33.9275	8.8002e-19	-1.16943	down
WBGene00013091	Y51B9A.9	41	57	77	326	357	332	0.870895	1.07107	1.38317	6.16609	6.34509	6.01611	7.09084e-19	2.12504	up
WBGene00013516	Y73F4A.3	495	460	437	1324	1412	1227	22.6801	18.4492	16.6851	52.9791	53.0513	46.9903	6.70798e-19	1.14153	up
WBGene00022445	Y110A2AL.9	83	81	71	356	410	423	4.674	3.97809	3.31266	17.5085	18.9726	19.943	6.57251e-19	1.92703	up
WBGene00012381	Y2H9A.4	337	223	294	1009	1257	958	5.01184	2.81225	3.47945	12.8546	15.5743	11.9161	5.62758e-19	1.5277	up
WBGene00015043	cyp-34A8	108	177	229	767	684	699	1.81612	2.61849	3.20266	11.3099	9.4288	9.86785	5.31222e-19	1.70057	up
WBGene00020456	fbxa-60	74	94	105	385	426	430	1.75569	1.9613	2.0887	8.04126	8.35949	8.60102	5.22132e-19	1.79826	up
WBGene00008352	fbxa-6	388	389	366	1270	1306	986	8.93063	7.84954	7.00809	25.5098	24.643	18.9532	4.84701e-19	1.2703	up
WBGene00012629	slc-36.3	150	146	142	598	617	506	2.88425	2.45203	2.26964	10.0621	9.7395	8.14495	4.71658e-19	1.59035	up
WBGene00015423	C04E6.7	421	453	439	1545	1182	1223	10.6866	10.0736	9.27872	34.2471	24.6126	25.9474	3.44341e-19	1.22792	up
WBGene00015371	C03A7.13	12	35	26	244	250	237	0.206824	0.531767	0.373787	3.79628	3.65426	3.52503	3.25674e-19	2.80495	up
WBGene00021478	Y39H10A.1	0	9	5	162	195	113	0	0.450292	0.221466	9.04676	10.2464	6.01389	2.99513e-19	4.02636	up
WBGene00020258	T05E7.1	394	412	432	1078	1093	1120	7.45132	6.82519	6.79916	17.8077	16.9538	17.708	2.82845e-19	1.05391	up
WBGene00015515	spdl-1	1294	1214	1428	703	924	675	22.4405	18.4441	20.6274	10.6313	13.1319	9.77912	2.41355e-19	-1.11544	down
WBGene00015889	C17C3.3	31	37	41	276	315	225	0.739519	0.765116	0.812992	5.75327	6.17539	4.48691	2.10442e-19	2.44297	up
WBGene00019381	K04C2.3	1000	900	1236	2667	3104	2350	48.8897	38.6405	50.2894	113.84	125.321	96.7484	2.09752e-19	1.01828	up
WBGene00018046	coa-3	799	1036	1022	530	627	511	37.92	43.1074	40.4181	21.9321	24.417	20.2654	1.94959e-19	-1.11016	down
WBGene00045379	C45B11.6	859	1056	1216	489	522	278	15.6772	16.8859	18.491	7.79177	7.80741	4.23645	1.83445e-19	-1.59045	down
WBGene00022056	ddx-35	786	762	972	465	414	491	9.48572	8.05368	9.76413	4.89051	4.08793	4.94545	1.76058e-19	-1.20937	down
WBGene00000009	aat-8	36	22	33	247	290	240	0.666765	0.35748	0.509745	4.07885	4.51217	3.80232	1.71632e-19	2.59674	up
WBGene00016152	pho-12	28	7	38	259	334	319	0.569798	0.116291	0.63731	4.60708	5.59839	5.44435	1.56244e-19	3.05502	up
WBGene00303026	T20D3.14	1162	1032	1159	692	671	662	81.5523	63.4478	67.7066	42.3523	38.6002	38.8007	1.42758e-19	-1.07115	down
WBGene00020532	math-42	143	184	195	636	641	583	1.6694	1.88268	1.89433	6.49484	6.14841	5.70831	1.39841e-19	1.46851	up
WBGene00017214	F07E5.9	13	4	3	206	281	115	0.220552	0.054077	0.031824	3.25148	4.17344	1.7299	1.37325e-19	3.91624	up
WBGene00000980	dhs-17	442	495	535	1229	1351	1190	6.99594	6.86037	7.04068	16.9622	17.5268	15.7275	1.17775e-19	1.00375	up
Caenorhabditis_elegans_newGene_1347	-	332	404	348	1228	1090	1000	14.2548	15.5312	12.6667	46.4992	38.181	36.2133	1.0776e-19	1.25188	up
WBGene00020741	dlhd-1	119	174	220	592	774	744	2.9053	3.72242	4.46196	12.6152	15.4898	15.1698	1.03543e-19	1.67201	up
WBGene00021850	Y54F10AM.6	576	802	1002	375	383	378	14.0641	17.1614	20.6404	8.06979	7.75443	7.77159	1.02186e-19	-1.37891	down
WBGene00014017	ZK632.10	506	843	729	1814	2202	1959	26.3559	40.0977	32.1749	80.4915	101.189	85.9098	8.28923e-20	1.17259	up
WBGene00011429	T04C12.7	31	8	16	230	345	240	1.2581	0.280337	0.542596	8.18012	11.53	8.16987	6.28183e-20	3.22508	up
WBGene00005642	srp-1	42	21	33	382	274	261	0.870487	0.38086	0.578827	7.02139	4.73557	4.5965	6.07706e-20	2.73554	up
WBGene00015402	C03G6.17	467	456	553	1253	1467	1245	12.4783	10.6936	12.3142	29.2687	32.1969	27.8303	5.71966e-20	1.06936	up
WBGene00016865	ets-9	312	311	337	1077	1016	871	5.81548	5.06323	5.23431	17.5586	15.5231	13.5703	5.1278e-20	1.26351	up
WBGene00011167	chil-23	171	131	199	753	816	583	3.64074	2.4381	3.51875	13.9927	14.2483	10.3615	4.84762e-20	1.71705	up
WBGene00015040	cyp-34A5	10	29	27	254	271	209	0.16354	0.445713	0.398168	4.01281	4.02533	3.15168	4.18512e-20	2.93937	up
WBGene00012850	Y44A6C.1	666	508	696	2399	2468	1593	14.543	9.72327	12.6644	45.7286	44.2017	29.0527	4.05881e-20	1.41496	up
WBGene00044697	poml-4	77	46	50	377	373	439	1.87598	0.966441	0.997162	8.00926	7.44751	8.93282	3.78662e-20	2.32123	up
WBGene00017813	nlp-61	417	504	468	1362	1225	1222	21.7384	22.9934	20.2999	61.9589	52.333	53.1826	3.75642e-20	1.10022	up
WBGene00022887	ZK1290.5	449	423	427	1322	1159	1375	11.1972	9.25837	8.78107	28.6657	24.3567	29.5197	3.51199e-20	1.20554	up
WBGene00012179	W01D2.1	23649	30759	27958	12391	15427	16249	2039.47	2332.15	2009.96	882.99	1093.36	1118.36	3.11311e-20	-1.23524	down
WBGene00011517	cgt-1	305	365	353	916	1119	984	5.4258	5.69129	5.22644	14.2104	16.3167	14.6107	2.69927e-20	1.20137	up
WBGene00004037	plc-2	603	620	723	1549	1907	1555	5.74786	5.1527	5.75877	12.9597	14.9731	12.426	2.68806e-20	1.00988	up
WBGene00013008	clec-146	193	208	192	628	837	722	8.26535	7.29112	6.39201	23.5154	27.4446	26.3038	2.30072e-20	1.50535	up
WBGene00007430	C08B6.10	138	179	183	625	607	599	3.8626	4.39219	4.26442	15.3211	13.9708	14.0496	2.25208e-20	1.5068	up
WBGene00044078	tag-243	399	448	429	1181	1294	1084	13.7045	13.4938	12.2327	35.5254	36.6945	31.1533	2.22889e-20	1.12059	up
WBGene00002188	kgb-2	17	24	35	272	255	213	0.370999	0.467139	0.64353	5.35114	4.72473	4.01397	1.95321e-20	2.78283	up
WBGene00013531	Y73F8A.26	771	991	1039	559	503	541	10.9223	12.3071	12.2682	6.90673	5.8388	6.40287	1.75089e-20	-1.13442	down
WBGene00007854	C31H5.1	4	3	4	175	164	101	0.086688	0.064283	0.080561	3.88248	3.42345	2.14022	1.45306e-20	4.19548	up
WBGene00022258	Y73C8B.1	107	122	194	747	666	558	2.80698	2.80194	4.23044	17.1398	14.3383	12.2436	1.35494e-20	1.84431	up
WBGene00003716	nhr-126	219	282	327	970	847	886	4.15553	4.70491	5.17314	16.1089	13.2226	14.0812	1.30684e-20	1.35298	up
WBGene00011155	rbm-3.1	441	540	611	177	264	182	26.2497	28.1931	30.3189	9.20686	12.888	9.05499	1.20059e-20	-1.6643	down
WBGene00010018	fbxa-69	20	23	8	214	286	214	0.436303	0.429427	0.140918	4.11762	5.17096	3.93555	1.16791e-20	3.17971	up
Caenorhabditis_elegans_newGene_1227	-	427	401	458	1176	1173	1205	4.47643	3.69083	3.91979	10.5146	9.95863	10.881	1.10847e-20	1.10817	up
WBGene00017303	F09F7.6	383	330	303	1166	1470	1062	28.6989	21.6988	18.9148	76.4109	90.4923	66.5836	1.04706e-20	1.47832	up
WBGene00009068	F23A7.3	110	76	119	590	476	508	3.08841	1.86121	2.77825	14.4588	10.9553	11.9194	1.02386e-20	1.96545	up
WBGene00021060	dct-11	360	298	335	1010	1074	1068	10.922	7.92362	8.45915	26.7641	26.7288	27.0758	8.53907e-21	1.29645	up
WBGene00012525	Y32B12C.1	38	64	57	342	378	308	1.05539	1.55689	1.32205	8.37646	8.70108	7.21029	7.45671e-21	2.26794	up
WBGene00003836	nxt-1	1173	1086	1327	764	734	689	52.4915	42.6633	50.2262	29.8415	27.0271	26.0615	6.99306e-21	-1.05319	down
WBGene00004123	pqn-36	753	984	988	512	520	539	7.20406	8.57906	8.07021	4.29784	4.00273	4.16385	6.84972e-21	-1.12612	down
WBGene00017427	acp-5	555	557	598	1484	1530	1375	10.6025	9.3179	9.51888	24.7418	23.9646	21.9422	6.29127e-21	1.00382	up
WBGene00012192	W02A11.1	771	867	871	411	499	493	20.4958	20.0957	19.1584	9.37221	10.7838	10.8503	6.2694e-21	-1.17587	down
WBGene00012162	sek-6	156	200	197	637	649	702	3.0143	3.39673	3.17228	10.7607	10.3061	11.3478	5.9012e-21	1.48061	up
WBGene00003812	nrf-5	868	844	792	2030	2397	2103	12.7606	10.943	9.71463	26.0525	28.9858	26.0289	5.80721e-21	1.01918	up
WBGene00003161	mdf-2	789	829	1068	517	501	456	23.2132	21.2438	25.7133	13.2789	12.1025	11.1014	5.52788e-21	-1.19483	down
WBGene00020392	knl-3	1015	1099	1096	661	638	692	22.934	21.7615	20.614	13.0268	11.8083	13.0496	5.35499e-21	-1.02993	down
Caenorhabditis_elegans_newGene_243	-	91	104	110	613	492	423	1.9326	1.94984	1.94007	11.4329	8.61601	7.54245	5.16969e-21	1.9312	up
WBGene00011185	R10D12.1	146	140	291	1062	1134	757	2.43034	2.03283	4.03496	15.4402	15.484	10.5396	5.15375e-21	1.97318	up
WBGene00008597	clec-55	23	32	45	448	321	230	0.54797	0.678504	0.904202	9.4716	6.38087	4.65756	4.97169e-21	2.82153	up
WBGene00012205	metl-1	1142	1509	1321	702	763	861	35.0847	40.6326	33.8057	18.8106	19.2088	22.0882	4.78215e-21	-1.10845	down
WBGene00001977	hmg-12	1076	1111	1125	588	714	690	27.6412	25.0219	24.0825	13.1813	15.0338	14.797	3.97348e-21	-1.07672	down
WBGene00007404	best-5	148	63	95	623	749	678	2.86255	1.05795	1.5275	10.5142	11.8723	10.9492	3.89625e-21	2.28516	up
WBGene00020157	T02B11.6	80	110	68	492	598	419	1.51487	1.82591	1.06813	8.18107	9.33851	6.66836	3.75919e-21	2.12505	up
WBGene00018928	F56B3.2	820	918	1230	536	425	507	14.4531	14.1834	18.0567	8.24375	6.13844	7.45808	3.51065e-21	-1.33398	down
WBGene00009908	F49H6.5	4	6	0	486	697	323	0.085421	0.118075	0	10.25	13.5277	6.39489	3.44536e-21	5.09202	up
WBGene00019388	K04F1.9	23	25	18	239	280	201	1.11393	1.02861	0.679824	10.4021	11.4288	8.35798	2.7347e-21	2.9064	up
Caenorhabditis_elegans_newGene_515	-	98	77	113	490	514	434	1.23097	0.691811	1.06319	5.75018	4.4475	4.25017	2.70212e-21	1.92279	up
WBGene00011997	nlp-51	437	534	600	1616	1422	1344	30.1767	32.3203	34.4933	97.4422	80.5311	77.5666	2.66195e-21	1.13098	up
WBGene00021862	fbxa-48	0	0	0	146	86	128	0	0	0	2.58515	1.43721	2.17796	2.44894e-21	5.32756	up
WBGene00018897	zipt-2.4	1228	1558	1436	874	763	910	18.0958	20.1293	17.5898	11.2208	9.35462	11.2375	2.3735e-21	-1.06485	down
Caenorhabditis_elegans_newGene_759	-	46	71	38	365	367	379	0.49871	0.947257	0.354629	3.58932	3.47987	3.45904	2.11454e-21	2.39237	up
WBGene00019318	K02E10.4	1158	1357	1745	837	642	785	20.843	21.4161	26.1856	13.1584	9.4694	11.794	1.9634e-21	-1.23313	down
WBGene00006491	acl-3	593	772	764	354	323	378	15.5391	17.7205	16.6766	8.08892	6.93297	8.26493	1.68038e-21	-1.33788	down
WBGene00021270	pid-3	1291	1285	1702	792	913	912	34.0375	29.6841	37.3696	18.2233	19.719	20.0813	1.55714e-21	-1.04442	down
WBGene00017924	mrps-21	946	1025	1066	638	629	556	63.1804	59.9862	59.314	37.1435	34.4126	30.9776	1.50131e-21	-1.07551	down
WBGene00008588	F08G12.5	37	76	71	452	446	343	1.5557	2.76858	2.47254	16.5766	15.3822	12.0312	1.45953e-21	2.332	up
WBGene00010931	M162.5	146	178	259	784	720	867	2.74819	2.92294	4.05066	12.8661	11.1032	13.6254	1.43794e-21	1.66189	up
WBGene00013975	ZK455.5	133	104	107	539	683	510	2.93256	2.0186	1.97402	10.4251	12.4101	9.44443	1.22846e-21	1.92246	up
WBGene00009734	F45G2.8	1209	1172	1109	675	651	674	57.5952	48.9644	44.004	28.0555	25.4101	26.8188	1.17011e-21	-1.14815	down
WBGene00012032	T26C5.2	1358	1899	2337	1106	948	846	18.8616	23.1193	27.0392	13.4095	10.7975	9.81059	1.16841e-21	-1.26414	down
WBGene00011908	pash-1	640	631	614	300	291	228	6.95587	6.01788	5.64907	2.85612	2.68757	2.08506	1.15739e-21	-1.53245	down
WBGene00021296	Y25C1A.13	514	576	654	1402	2077	1722	13.6693	13.4323	14.4821	32.5664	45.3161	38.2678	1.15601e-21	1.21786	up
WBGene00004180	pri-1	825	935	1106	515	600	545	17.2392	17.1474	19.2553	9.37299	10.4011	9.49427	1.13644e-21	-1.12091	down
WBGene00016506	abhd-5.1	102	105	118	525	682	437	2.05631	1.85439	1.97256	9.23791	11.2862	7.36147	1.1173e-21	1.93948	up
WBGene00001399	fat-7	463	543	345	116	154	120	11.4198	11.7355	7.0876	2.48461	3.10635	2.47109	1.06383e-21	-2.09277	down
WBGene00007178	B0457.2	539	642	687	1455	1917	1677	11.9914	12.5042	12.7185	28.2429	34.9594	31.1562	9.89047e-22	1.08096	up
WBGene00000715	col-142	115	137	124	546	502	636	3.05112	3.19182	2.7282	12.661	10.9244	14.1098	9.07945e-22	1.77902	up
WBGene00013078	ttr-25	611	651	764	1538	1886	1904	29.4245	27.4611	30.637	64.6146	74.4631	76.5634	8.75245e-22	1.04233	up
WBGene00021446	hlh-33	379	449	334	1248	1368	1192	8.43205	8.74426	6.17723	24.2397	24.9587	22.1664	7.44338e-22	1.3416	up
WBGene00077490	M03A1.8	220	213	314	889	888	838	4.67073	3.95483	5.5425	16.4834	15.4631	14.8622	6.86788e-22	1.44789	up
WBGene00000005	aat-4	262	323	284	85	46	48	4.04383	4.36871	3.64779	1.14511	0.571237	0.614873	6.54367e-22	-2.51247	down
WBGene00022115	Y71F9AL.10	533	594	797	1680	1741	1733	9.763	9.53669	12.1687	26.8874	26.1738	26.5381	6.356e-22	1.07577	up
WBGene00011400	T03F6.4	388	415	382	1162	1150	1143	8.3287	7.79675	6.82822	21.7689	20.2297	20.494	5.99112e-22	1.18216	up
WBGene00013131	pigl-1	892	935	977	565	559	539	31.8762	29.2914	29.0968	17.6321	16.3898	16.0928	5.71504e-22	-1.0936	down
WBGene00018827	pst-2	879	1088	1182	606	654	639	20.3874	21.1174	22.9307	12.2242	12.3386	12.3461	4.87824e-22	-1.06314	down
WBGene00004385	rnp-2	1241	1396	1397	832	769	911	46.3877	45.7379	43.5115	27.1504	23.5605	28.4509	4.8033e-22	-1.02264	down
WBGene00010740	K10D3.6	249	147	252	1199	1128	833	8.6451	4.45914	7.29359	36.4391	32.1778	24.223	4.79831e-22	1.88728	up
WBGene00018424	pgph-2	1609	1243	2137	9857	10769	13926	36.9225	24.9841	40.8443	197.408	202.58	266.925	4.53638e-22	2.36038	up
WBGene00019220	pfd-2	1683	2017	1953	902	1292	1175	82.7802	86.9369	79.9765	38.6803	52.0632	48.2562	4.4515e-22	-1.08721	down
WBGene00015695	ugt-26	278	461	489	1489	1324	1342	4.03654	5.87757	5.92548	18.9108	15.7917	16.3114	4.23642e-22	1.40974	up
WBGene00006684	twk-32	101	156	144	549	873	603	1.49191	2.01879	1.76961	7.10492	10.6097	7.46595	4.05086e-22	1.94351	up
WBGene00018878	glit-1	2212	2797	2465	1479	1335	1747	25.2534	27.9812	23.4348	14.7302	12.4925	16.6591	3.96874e-22	-1.0505	down
WBGene00009925	F52B11.2	1240	1250	1455	680	868	830	30.6144	27.4706	30.3817	14.2904	17.2431	17.0345	3.91672e-22	-1.07051	down
WBGene00022117	Y71F9AL.12	1043	1024	1192	682	650	597	33.2968	28.6468	31.7096	18.9892	17.0016	15.9172	3.89401e-22	-1.0952	down
WBGene00021963	lipl-6	575	732	911	276	360	344	8.5897	9.58296	11.3391	3.58866	4.40446	4.28966	3.75582e-22	-1.49327	down
WBGene00011420	T04A11.5	171	187	129	673	967	720	4.97445	4.77101	3.11659	17.1489	23.1507	17.5722	3.55957e-22	1.87125	up
WBGene00005078	src-2	1480	1871	1922	959	938	1214	24.1249	26.7427	26.1013	13.6401	12.5382	16.5253	3.26007e-22	-1.09359	down
WBGene00020865	T27E4.7	295	477	489	1591	1539	1226	14.3138	20.3377	19.8165	67.5427	61.3973	49.8207	2.98558e-22	1.4357	up
Caenorhabditis_elegans_newGene_294	-	79	101	107	539	447	449	1.64327	2.04553	2.08702	10.9551	8.84404	8.74699	2.68876e-22	1.93456	up
WBGene00007957	C35C5.8	210	237	332	855	962	900	4.01977	3.97637	5.28564	14.2807	15.1997	14.5626	2.66941e-22	1.4456	up
Caenorhabditis_elegans_newGene_653	-	37	44	60	350	319	317	0.87511	0.920006	1.19793	7.87488	6.64494	6.75288	2.52699e-22	2.3782	up
WBGene00018755	bcmo-2	355	421	564	1377	1362	1289	5.96314	6.19643	7.89569	20.2139	18.7932	18.1205	2.51531e-22	1.24015	up
WBGene00013079	ttr-26	2166	2408	2990	1658	1707	1283	104.946	102.316	120.738	70.128	67.8065	51.861	2.01785e-22	-1.03599	down
WBGene00009801	ipla-2	646	840	1078	2276	2480	2218	4.91215	5.59525	6.82768	15.1063	15.4616	14.0942	1.99756e-22	1.10112	up
WBGene00009966	isy-1	1228	1372	1329	871	801	811	38.3715	37.5615	34.5475	23.737	20.4525	21.1169	1.99336e-22	-1.0035	down
WBGene00219208	B0365.9	945	1140	1379	602	352	381	28.931	30.609	35.1725	16.0803	8.83445	9.74581	1.82348e-22	-1.6777	down
WBGene00015479	wht-1	104	114	110	518	625	451	1.37978	1.52945	1.20261	6.05752	6.84188	5.03767	1.63011e-22	1.88644	up
WBGene00013849	ZC84.6	441	651	760	226	264	234	2.5986	3.36249	3.73052	1.15824	1.27277	1.14955	1.41675e-22	-1.65859	down
WBGene00020569	lgc-32	249	209	311	943	1008	848	5.53919	4.0874	5.77037	18.361	18.4383	15.8065	1.4146e-22	1.49707	up
WBGene00007402	ugt-60	1282	1224	1607	852	758	805	20.7119	17.327	21.6178	12.0019	10.0365	10.8621	1.26513e-22	-1.10263	down
WBGene00019803	PDB1.1	766	630	817	1992	1985	2161	17.5776	12.6781	15.6123	39.8506	37.3168	41.5325	1.23673e-22	1.11302	up
WBGene00020908	VC5.2	602	588	607	1631	1585	1552	8.65179	7.4039	7.26886	20.4931	18.5941	18.6414	1.02614e-22	1.04979	up
WBGene00013986	ZK512.7	277	258	333	51	43	82	14.3986	11.7721	14.429	2.28048	1.83536	3.56891	1.02614e-22	-2.5363	down
WBGene00011419	T04A11.4	418	384	374	1188	1212	1348	12.0025	9.67272	8.95693	29.815	28.5701	32.3817	8.54552e-23	1.30336	up
WBGene00010086	F55B11.4	312	462	399	1097	1447	1419	15.7558	20.4572	16.7822	48.3737	59.9208	59.8524	8.11368e-23	1.39528	up
WBGene00003721	nhr-131	264	296	244	1023	890	950	5.13968	5.1215	3.97916	17.8404	14.2467	15.4958	7.92892e-23	1.46147	up
WBGene00000870	cyd-1	1722	2293	2628	1404	1293	1439	23.7926	29.75	30.2406	16.9438	14.6965	16.621	7.59788e-23	-1.01176	down
WBGene00021531	Y42G9A.1	151	158	169	651	705	567	3.61017	3.29473	3.35509	13.5855	13.8235	11.323	6.81883e-23	1.63259	up
WBGene00004811	skr-5	56	82	57	432	422	372	3.10297	3.94997	2.62506	20.8976	19.1857	17.198	6.16324e-23	2.23226	up
WBGene00021121	W09G12.7	109	117	168	606	787	539	2.21735	2.08208	2.83702	10.7645	13.1214	9.16042	6.04132e-23	1.90899	up
WBGene00045246	C29E4.15	727	895	1059	490	398	414	28.5098	30.7679	34.6147	16.753	12.7757	13.5528	6.03653e-23	-1.36224	down
WBGene00007748	C26E1.2	208	165	194	754	720	813	3.90799	2.72731	3.10306	12.5976	11.2581	12.9862	5.8812e-23	1.63134	up
WBGene00015788	C15B12.8	35	15	23	266	281	317	0.75658	0.279757	0.409175	5.03031	4.99461	5.73392	5.50184e-23	3.01168	up
WBGene00000675	col-101	70	116	50	574	555	549	1.86991	2.57278	1.0575	13.0374	11.7472	12.0872	5.06852e-23	2.38649	up
WBGene00003057	lon-3	2053	3053	3775	1708	1592	1528	50.7172	66.093	77.6563	36.8054	32.2291	31.5147	4.71765e-23	-1.1963	down
WBGene00013947	ZK228.4	1888	1944	1748	1113	1149	1215	56.5144	51.022	43.5121	29.0207	28.3349	30.376	4.71728e-23	-1.0304	down
WBGene00004113	pqn-24	883	903	1216	2776	3074	2336	24.7616	22.1787	28.3855	67.9161	70.66	54.6958	3.75221e-23	1.0974	up
WBGene00018384	F43C11.7	186	178	99	2284	2046	1932	5.49594	4.61592	2.43134	59.1701	49.7757	47.9012	3.70528e-23	3.16704	up
WBGene00005000	spp-15	457	473	389	1616	1729	1266	22.4202	20.3241	15.8832	69.2281	69.5645	51.8973	3.63212e-23	1.42989	up
WBGene00007145	B0334.5	1346	1643	1488	851	856	993	26.4978	28.3476	24.406	14.6171	13.8085	16.3213	3.6277e-23	-1.06909	down
WBGene00017348	F10E7.6	1247	1461	1298	837	811	761	57.1894	58.7035	49.5634	33.4857	30.48	29.1384	2.95399e-23	-1.07558	down
WBGene00012950	eif-2Bbeta	1124	1267	1430	833	779	799	26.1478	25.8393	27.7064	16.9067	14.8607	15.5217	2.86169e-23	-1.00051	down
WBGene00015930	cest-4	198	234	352	937	1034	989	2.86731	2.96758	4.24918	11.8681	12.3062	11.9955	2.833e-23	1.56035	up
WBGene00008177	C48D1.1	312	386	321	1090	1077	1075	4.70009	5.05843	3.96473	14.1999	13.258	13.4964	2.67664e-23	1.30729	up
WBGene00015620	C08G9.2	830	983	1378	455	347	501	3.34906	3.47564	4.63391	1.60025	1.14728	1.68666	2.5841e-23	-1.59661	down
WBGene00023419	F53F4.16	951	1156	890	436	525	488	65.0755	69.3389	50.703	26.0412	29.4157	27.8779	2.40746e-23	-1.38661	down
WBGene00015896	C17C3.15	98	124	163	578	585	573	3.29336	3.63263	4.55013	16.9674	16.1151	16.0872	2.29113e-23	1.80102	up
WBGene00020148	T01D1.3	178	300	252	1133	899	946	6.19288	9.17907	7.31452	34.5369	25.7401	27.6049	2.2501e-23	1.66347	up
WBGene00007194	B0491.7	1093	1189	1190	683	764	697	31.1736	29.7237	28.2651	16.9831	17.8525	16.6084	2.14491e-23	-1.03812	down
WBGene00007972	prp-4	987	1179	1167	590	578	699	16.9628	17.7671	16.7023	8.85019	8.14578	10.0302	1.89505e-23	-1.17094	down
WBGene00017756	F23F12.12	101	124	151	500	791	624	2.86657	3.09849	3.57394	12.4641	18.5171	14.8819	1.78014e-23	1.95917	up
WBGene00044481	ZK185.5	94	153	95	653	797	534	2.2644	3.24095	1.90003	13.7886	15.8091	10.7934	1.75543e-23	2.12551	up
WBGene00007549	spin-1	1838	2178	2154	1119	1205	1469	29.1911	30.3055	28.49	15.4985	15.685	19.4733	1.57923e-23	-1.04065	down
WBGene00007989	fipr-22	35	50	35	348	331	293	1.43739	1.84139	1.2233	12.7752	11.4102	10.3055	1.53348e-23	2.56137	up
WBGene00001372	exo-3	454	567	575	219	213	241	12.7748	13.9881	13.4896	5.38571	4.90964	5.67558	1.5118e-23	-1.56468	down
WBGene00008229	C50F4.1	922	831	1143	2914	2853	2329	20.1994	15.8476	20.6291	55.0521	50.852	42.0509	1.47152e-23	1.12973	up
WBGene00007488	dph-2	1415	1544	1325	736	831	863	25.0057	23.9361	19.9813	11.4713	12.0523	13.2216	1.41731e-23	-1.16307	down
WBGene00003522	nas-3	315	453	491	129	62	87	7.80828	9.83574	10.1334	2.77904	1.24744	1.80024	1.37684e-23	-2.41827	down
WBGene00015633	C09D4.2	278	158	301	1266	1206	1049	8.39294	4.18097	7.55052	33.3617	29.8592	26.4462	1.02742e-23	1.86529	up
WBGene00012556	mrps-10	863	1035	1123	530	420	550	41.6805	43.8402	45.1712	22.3356	16.6383	22.1834	9.51834e-24	-1.33527	down
WBGene00011106	acl-5	1142	1436	1456	2923	4069	3448	19.1045	20.7662	19.9503	41.5534	55.0143	47.5253	9.42751e-24	1.02004	up
WBGene00017751	F23F12.3	246	198	268	39	47	50	3.99327	2.82229	3.62656	0.551594	0.615404	0.67842	8.78342e-24	-2.62355	down
WBGene00019854	R03H10.1	28	31	35	282	304	254	0.804065	0.76618	0.841135	7.15325	7.24914	6.16231	8.72376e-24	2.68885	up
WBGene00013439	Y66D12A.13	354	363	390	1073	1078	1167	5.93222	5.32193	5.44424	15.6985	14.8158	16.3434	8.67161e-24	1.22509	up
WBGene00008915	F17C11.4	653	580	975	2699	2859	2067	18.8912	14.6887	23.4853	68.1659	67.8341	49.9569	8.56433e-24	1.43194	up
WBGene00007517	gpx-3	821	741	661	239	339	268	28.599	22.6177	19.1834	7.25564	9.6725	7.79837	6.23304e-24	-1.72665	down
WBGene00000753	col-180	759	1562	1629	448	486	493	21.6507	39.0427	38.692	11.1346	11.3565	11.7392	5.94622e-24	-1.75978	down
WBGene00008850	F15B9.6	69	62	51	403	481	369	1.21682	0.961613	0.757824	6.27513	7.04092	5.4933	4.88253e-24	2.34326	up
WBGene00009097	fipr-2	1690	1992	1795	3878	5144	5224	100.171	103.489	102.531	232.34	289.573	300.141	4.52302e-24	1.02178	up
WBGene00014004	fic-1	503	515	549	1395	1413	1416	8.30679	7.46214	7.55554	20.1375	19.1515	19.5603	3.20597e-24	1.07515	up
WBGene00043062	clec-80	748	933	960	392	406	496	19.3	20.083	20.7567	8.33891	8.16847	9.89795	2.76535e-24	-1.35653	down
WBGene00003697	nhr-107	287	326	373	1304	1435	947	6.89139	6.89408	7.45706	27.2214	28.2864	18.9256	2.69956e-24	1.53698	up
WBGene00013674	Y105E8A.14	1475	1636	1751	862	928	1113	26.529	25.7847	26.2267	13.5306	13.6748	16.722	2.64932e-24	-1.08204	down
WBGene00017329	ugt-39	773	633	804	321	320	242	12.1093	8.58555	10.5095	4.35109	4.07927	3.17142	2.40272e-24	-1.64956	down
WBGene00007904	C33G3.4	334	383	387	1089	1152	1045	3.26402	3.28472	3.15042	9.30257	9.24099	8.54138	2.06928e-24	1.21665	up
WBGene00021347	rpb-10	627	1150	1149	237	304	392	50.7568	81.6412	77.5222	16.7299	20.1875	26.4671	2.01364e-24	-1.93545	down
WBGene00009533	F38B7.2	285	267	300	928	1100	904	7.7738	6.40089	6.81925	22.1739	24.761	20.6688	1.92128e-24	1.41497	up
WBGene00013695	epg-8	699	684	737	1997	1763	2059	14.2419	12.2769	12.4575	34.5391	29.1484	34.4372	1.87025e-24	1.10067	up
WBGene00008389	D1086.2	37	33	54	354	437	287	1.3833	1.09368	1.7469	12.0933	14.0317	9.38461	1.84634e-24	2.65959	up
WBGene00002058	ifd-2	918	938	1002	510	574	525	16.8278	15.0695	15.3073	8.16248	8.63012	8.03894	1.80874e-24	-1.1693	down
Caenorhabditis_elegans_newGene_1275	-	27	21	28	245	295	264	0.476098	0.2969	0.30153	2.5088	2.88833	3.64005	1.56357e-24	2.89754	up
WBGene00003680	nhr-90	412	503	402	1410	1345	1381	8.67198	9.2832	7.04521	25.9297	23.2446	24.318	1.50664e-24	1.28845	up
WBGene00018547	clec-78	1336	1974	2447	972	1001	910	3.43343	4.44768	5.23896	2.17979	2.10844	1.95326	1.42927e-24	-1.31358	down
WBGene00008485	ugt-43	31	24	19	283	300	256	0.489768	0.337303	0.248689	4.14696	4.08898	3.5119	1.35144e-24	2.97386	up
WBGene00017535	atf-8	661	906	1107	370	246	196	18.5952	22.3355	25.9477	9.09196	5.67774	4.58709	1.28745e-24	-2.00071	down
Caenorhabditis_elegans_newGene_1273	-	102	109	75	469	665	608	1.34278	1.26503	0.819944	5.41767	7.21765	6.72544	1.13326e-24	2.18341	up
WBGene00015227	ddn-1	27	29	60	1938	2429	947	0.513568	0.49066	0.957419	32.8655	38.6925	15.3647	1.08135e-24	4.49482	up
WBGene00020774	T24E12.5	66	95	65	417	641	473	0.853725	1.08657	0.704648	4.76815	6.89085	5.1827	1.05096e-24	2.33068	up
WBGene00001636	gly-11	893	1036	1116	524	521	613	12.6143	12.8324	13.1282	6.45886	6.03689	7.22284	9.83575e-25	-1.20981	down
WBGene00008692	scav-4	1126	1239	1405	626	689	801	16.7518	16.159	17.4189	8.13035	8.401	9.95168	9.76838e-25	-1.16801	down
WBGene00012466	ippk-1	849	704	756	2899	2698	2087	10.1717	7.38878	7.54837	30.3283	26.5092	20.8951	9.11226e-25	1.36293	up
WBGene00015839	math-10	3	0	0	142	183	140	0.054234	0	0	3.35964	4.05447	3.16281	9.04545e-25	5.16801	up
WBGene00017950	F31E3.2	690	800	750	1986	1879	2244	11.9187	12.0609	10.8363	30.0348	26.7425	32.4716	8.51552e-25	1.09304	up
WBGene00003617	nhr-18	236	182	241	922	921	804	5.47872	3.69744	4.64942	18.6655	17.5267	15.5812	7.90561e-25	1.62927	up
WBGene00008317	C54G4.7	832	897	750	2401	2227	2375	14.3557	13.5974	10.8194	36.0997	31.3516	34.1439	7.86468e-25	1.13631	up
WBGene00012917	Y46G5A.29	400	456	575	166	191	156	4.43326	4.4356	5.31302	1.60104	1.73008	1.44613	7.86468e-25	-1.78672	down
WBGene00022783	tomm-7	714	915	904	226	349	384	68.8352	77.3143	72.6378	19.0181	27.6071	30.9494	7.72808e-25	-1.71703	down
WBGene00003082	lsm-8	1208	1364	1448	711	909	739	59.9459	59.3163	59.8501	30.7758	36.9666	30.5928	7.56274e-25	-1.10858	down
WBGene00012628	Y38H6C.16	660	817	930	319	414	387	25.7218	27.8905	30.1621	10.8365	13.224	12.5681	7.4353e-25	-1.42796	down
WBGene00011099	nhr-208	77	69	101	479	463	448	1.65765	1.30513	1.81609	9.03346	8.2033	8.09167	6.40034e-25	2.09569	up
WBGene00003390	mog-2	1771	1943	1778	975	955	1198	49.7093	50.0059	41.5695	24.7278	21.9473	29.1293	5.5526e-25	-1.15407	down
WBGene00021460	zwl-1	1172	1105	1476	709	596	651	16.0976	13.333	16.8843	8.73092	6.95288	7.4854	4.0103e-25	-1.27082	down
WBGene00008605	mlt-9	2960	4261	5120	2525	2376	2210	38.0762	48.2562	55.0798	28.3697	25.0911	23.9452	3.93817e-25	-1.11744	down
WBGene00004001	pgp-7	82	87	41	534	551	566	0.59463	0.557771	0.24431	3.41477	3.309	3.46443	3.6132e-25	2.51361	up
WBGene00045096	K01A6.7	0	6	10	169	210	208	0	0.405071	0.683241	12.7217	14.8732	15.0143	3.41189e-25	4.2725	up
WBGene00003861	oig-3	583	531	483	1648	1878	1631	31.0927	24.782	21.4282	76.6921	82.1088	72.6647	3.3033e-25	1.31869	up
WBGene00011364	cest-1.2	316	349	497	1347	1435	1187	3.95857	3.83019	5.19052	14.7385	14.7491	12.4349	3.23569e-25	1.41921	up
WBGene00009384	piit-1	370	300	245	59	48	59	12.4162	8.81513	6.83483	1.72188	1.29639	1.65587	2.59691e-25	-2.70983	down
WBGene00019636	gsto-3	199	288	338	1069	1213	930	6.32086	7.76366	8.59858	28.9075	30.7984	24.0445	2.53958e-25	1.60256	up
WBGene00003707	nhr-117	381	354	387	1218	1362	1095	7.55757	5.81839	6.36954	20.6087	21.8339	18.0916	2.52883e-25	1.34563	up
WBGene00006464	bath-47	278	347	426	1170	1149	1101	3.51401	3.83924	4.4813	12.9112	11.9193	11.6308	2.45935e-25	1.35146	up
WBGene00018413	cyp-33C4	89	99	102	450	534	495	1.63689	1.60733	1.57002	7.27306	8.10206	7.65512	2.41104e-25	1.95975	up
WBGene00010480	tasp-1	1107	973	1484	3189	3371	3254	22.6239	17.2481	22.9666	57.1224	57.6641	56.0977	2.17071e-25	1.11165	up
WBGene00020501	T14B4.5	676	778	975	340	423	340	23.8836	24.0829	28.6893	10.4827	12.2341	10.0297	2.12895e-25	-1.46175	down
WBGene00010850	M04C3.1	864	811	1069	2898	2825	2238	6.66667	5.49525	6.83713	19.3378	17.6548	14.4278	1.82295e-25	1.18279	up
WBGene00003647	nhr-57	221	212	262	771	882	924	4.36386	3.66832	4.318	13.3265	14.3197	15.2896	1.77306e-25	1.52415	up
WBGene00011800	T16G1.6	50	84	72	631	468	407	0.946631	1.40674	1.14356	10.5931	7.37554	6.52681	1.6169e-25	2.44763	up
WBGene00010304	clpf-1	1036	1064	1221	598	697	589	21.0908	19.0021	20.7378	10.6528	11.6255	10.0103	1.50762e-25	-1.15674	down
WBGene00000975	dhs-12	895	782	939	2162	2513	2627	29.7423	22.7759	25.9935	62.7167	68.467	72.9357	1.27301e-25	1.1214	up
WBGene00009663	hda-5	99	80	89	444	570	534	1.72694	1.22785	1.29498	6.79745	8.19143	7.82991	1.27228e-25	2.11951	up
WBGene00021514	Y41D4B.11	1873	2011	2319	1351	1049	1241	45.8357	43.1205	47.312	28.8929	21.0298	25.3678	1.21555e-25	-1.10278	down
Caenorhabditis_elegans_newGene_1795	-	1183	1181	1404	763	737	744	13.7057	11.9997	13.5624	7.7154	6.99286	7.19808	7.42147e-26	-1.08626	down
WBGene00022540	ZC190.6	20	15	24	244	278	242	0.77207	0.532008	0.783983	8.64778	9.23063	8.19383	7.01558e-26	3.15502	up
WBGene00009978	F53E4.1	946	1028	1139	2646	3050	2357	16.2178	15.5426	16.1282	39.3664	42.601	33.6385	6.12411e-26	1.01877	up
WBGene00009773	lipl-2	520	414	541	1585	1536	1600	11.3797	7.93017	9.85903	30.259	27.5371	29.2335	5.9628e-26	1.31518	up
WBGene00022092	Y69A2AR.21	886	987	1007	498	554	433	44.2616	43.2089	41.894	21.7109	22.6868	18.0712	5.29024e-26	-1.29208	down
WBGene00003763	nlp-25	36	39	30	274	351	386	3.70524	3.56867	2.59003	25.1029	30.2729	33.8737	5.1567e-26	2.7858	up
WBGene00007890	C33A12.19	173	200	167	691	808	747	5.99382	6.07794	4.8246	20.9363	22.9964	21.6627	4.44655e-26	1.67826	up
WBGene00009330	F32D8.5	1099	1161	1426	724	640	688	31.8499	29.5229	34.3874	18.3125	15.1723	16.7549	4.16692e-26	-1.17743	down
WBGene00014224	mrps-23	847	899	920	466	455	486	50.5651	46.965	45.4532	24.1495	22.0878	24.0145	4.09687e-26	-1.25956	down
WBGene00011100	nhr-209	354	322	255	1500	1418	1137	6.34734	5.05931	3.79836	23.4979	20.8617	17.0407	4.08085e-26	1.73199	up
WBGene00007236	C01G10.9	1361	1200	1367	650	696	758	29.5025	23.156	25.4455	12.0459	12.0723	13.0088	4.00317e-26	-1.24331	down
WBGene00022269	aatf-1	1288	1317	1545	684	877	811	23.1171	20.7195	23.0939	10.7093	12.9015	12.1493	3.74233e-26	-1.14626	down
WBGene00009033	F21H7.12	0	0	0	161	187	129	0	0	0	6.31311	6.89067	4.84221	3.19464e-26	5.7543	up
WBGene00018572	lin-42	7754	11262	13789	4053	3961	3807	88.1743	114.882	130.468	40.5459	36.2256	35.8887	2.84368e-26	-1.77098	down
WBGene00017798	slc-17.8	753	977	1024	342	310	457	10.7335	12.2081	12.2164	4.29871	3.65926	5.43729	2.4933e-26	-1.62721	down
WBGene00012728	Y39G8B.9	552	730	558	223	243	212	38.1326	44.1704	32.1091	13.435	13.7564	12.2212	2.34121e-26	-1.76129	down
WBGene00019699	math-34	28	43	59	381	512	324	0.466271	0.649604	0.841227	5.72051	7.23514	4.66111	2.26448e-26	2.7699	up
WBGene00007552	C13C12.2	608	656	674	287	314	281	11.4522	10.8326	10.5648	4.71618	4.84309	4.41196	2.24102e-26	-1.46742	down
WBGene00003523	nas-4	704	1121	1323	440	369	373	13.6652	19.0779	21.546	7.34427	5.99168	6.18143	1.91371e-26	-1.71239	down
WBGene00017376	F11C7.2	1253	1334	1403	336	530	640	67.8616	63.3374	63.2717	15.8452	23.5254	28.9438	1.46466e-26	-1.72821	down
WBGene00001858	hil-7	225	282	339	990	1075	933	11.4108	12.6884	14.1849	42.0321	43.7587	39.6691	1.39379e-26	1.46957	up
WBGene00021829	mrpl-17	1785	1888	1942	1035	993	1250	73.1442	68.8178	67.2266	37.28	33.8059	40.2932	1.21834e-26	-1.11698	down
WBGene00012998	Y48C3A.20	1742	1771	1851	1077	1106	1216	33.0629	29.4483	29.2544	17.8262	17.2069	19.2744	1.21346e-26	-1.00257	down
WBGene00002018	hsp-16.41	328	300	281	41	67	27	14.2126	11.394	10.1611	1.52215	2.37145	0.959705	8.96545e-27	-2.9653	down
WBGene00010945	chil-13	148	201	301	1160	1021	924	2.69025	3.19949	4.55361	18.4252	15.2294	14.0511	8.96336e-27	1.89316	up
WBGene00016863	cest-35.2	27	40	30	319	317	301	0.419524	0.554348	0.394645	4.43987	4.14363	3.9977	8.91586e-27	2.80111	up
WBGene00016218	pals-23	363	378	531	1456	1409	1305	11.1136	9.81029	13.3127	38.9808	34.9122	32.834	8.76241e-27	1.36126	up
WBGene00009889	F49E11.2	738	995	1156	467	417	430	16.1439	19.2025	21.3328	8.81899	7.37097	7.77912	8.72098e-27	-1.45423	down
Caenorhabditis_elegans_newGene_703	-	444	466	494	181	150	150	2.61653	2.44055	2.30468	0.878079	0.681393	0.693549	8.02705e-27	-1.85774	down
WBGene00017667	ttr-37	36	21	18	373	346	279	1.78096	0.891224	0.733614	16.0967	14.0389	11.5306	7.90616e-27	3.17843	up
WBGene00010397	suox-1	1557	1809	2018	1115	955	1135	23.7181	24.1509	25.6112	14.8204	11.9039	14.4379	6.97457e-27	-1.08212	down
WBGene00013740	hut-1	1845	1821	2177	1272	1081	1183	41.4896	35.9492	40.909	25.2018	19.7833	22.173	6.31946e-27	-1.06292	down
WBGene00302968	Y62E10A.24	1322	1257	1543	767	859	765	62.8069	52.2978	61.0272	31.7762	33.4159	30.3391	6.25711e-27	-1.12605	down
WBGene00004178	prg-1	1456	1559	1608	901	1057	928	15.1499	14.2104	13.9273	8.18117	9.01464	8.06119	5.91793e-27	-1.02371	down
WBGene00008856	F15D3.6	1374	1388	1276	3812	3601	3298	39.8627	35.2814	30.8156	96.5004	85.626	79.909	5.3632e-27	1.04752	up
WBGene00009078	rpb-12	563	553	563	171	151	223	47.8004	41.1287	39.8269	12.679	10.4606	15.824	5.04539e-27	-1.93526	down
WBGene00019477	cest-17	634	659	832	2179	2171	1793	8.49058	7.7325	9.27472	25.4646	23.835	20.0568	4.97601e-27	1.18047	up
WBGene00001390	far-6	384	473	371	1572	1678	1260	9.76129	10.5498	7.85569	34.9283	35.0388	26.8046	4.65243e-27	1.5066	up
WBGene00003797	npp-11	3182	3151	3625	2028	1840	2351	33.9298	29.4469	32.196	18.8719	16.0816	20.9355	4.45861e-27	-1.01975	down
WBGene00007452	C08F11.3	20	38	31	367	300	299	0.516581	0.866234	0.662451	8.38453	6.43945	6.54154	3.95488e-27	2.95626	up
WBGene00006965	xtr-1	154	165	154	620	732	742	4.82591	4.54058	4.01933	17.0042	18.8798	19.4951	3.41499e-27	1.76608	up
WBGene00016768	cyp-33E1	436	479	490	1322	1517	1305	7.87364	7.46893	7.37177	20.777	22.4388	19.6733	3.21851e-27	1.20304	up
WBGene00002256	lbp-4	1319	1285	1612	803	760	622	61.8961	52.8475	62.9024	32.8979	29.2171	24.3297	3.03518e-27	-1.28213	down
WBGene00007963	cyp-25A1	29	27	41	325	332	292	0.502861	0.412686	0.598226	5.02505	4.81932	4.31878	2.89543e-27	2.82281	up
WBGene00001478	fmo-3	418	342	460	1558	1295	1573	6.80101	4.87019	6.22093	22.0599	17.2333	21.3468	2.62002e-27	1.49472	up
WBGene00016978	C56G2.3	1398	1568	1708	830	933	1024	26.3786	25.7926	26.8969	13.2012	13.9189	15.6999	2.53948e-27	-1.08427	down
WBGene00012945	Y47H9A.1	167	134	105	821	846	706	3.67486	2.5902	1.92084	15.8242	15.3314	13.0209	1.78973e-27	2.12979	up
WBGene00014053	ZK669.3	5	0	5	185	183	204	0.155138	0	0.146211	6.18132	5.7488	6.54853	1.7366e-27	4.69054	up
WBGene00007288	C04A11.5	10	12	2	249	232	214	0.611022	0.614314	0.086178	13.3134	11.6737	10.9438	1.716e-27	4.05949	up
WBGene00021072	W07B8.4	184	175	252	923	1343	827	4.60405	3.79482	5.30568	19.5861	27.0443	16.9135	1.47672e-27	1.95512	up
WBGene00012966	exos-1	1273	1261	1364	694	722	794	44.8692	38.9722	40.0526	21.3345	20.8634	23.3823	1.26864e-27	-1.16035	down
WBGene00019592	K09F6.9	312	337	376	1182	1193	1017	3.18068	3.01319	3.19397	10.5466	9.99944	8.67932	1.25701e-27	1.36815	up
WBGene00003156	mcm-4	2820	3043	3633	1610	2025	2161	29.9075	28.2668	32.1438	14.8887	17.5865	19.1471	1.21996e-27	-1.0503	down
WBGene00001752	gst-4	1458	1050	1381	6588	6925	7333	49.3583	31.1292	38.9244	194.599	192.141	207.329	1.13584e-27	2.02216	up
WBGene00008762	ztf-2	2028	2490	3133	1260	1198	1557	30.5801	32.9028	39.342	16.5687	14.8079	19.61	9.89856e-28	-1.25414	down
WBGene00004989	spp-4	802	1011	1026	438	470	513	51.8347	57.0967	55.0431	24.6396	24.789	27.5769	9.50812e-28	-1.32909	down
WBGene00017048	D2021.4	212	202	206	838	836	786	5.49757	4.73519	4.58206	19.2871	18.4204	17.5412	8.11794e-28	1.61516	up
WBGene00020188	T03F1.6	58	41	50	388	394	406	1.3139	0.80233	0.939779	7.73161	7.36547	7.74641	8.05847e-28	2.55161	up
WBGene00010985	R03A10.5	118	108	104	525	627	615	2.46947	1.98411	1.8132	9.64348	10.8213	10.8061	7.88344e-28	2.02242	up
WBGene00003473	mtl-1	5	28	24	1086	1222	1363	0.351447	1.77791	1.44759	70.5781	74.6193	84.7797	4.60673e-28	4.88682	up
WBGene00185067	Y54G11A.17	1073	1289	1255	565	709	669	62.7326	66.0689	61.1503	28.8102	33.9866	32.6667	4.1224e-28	-1.23438	down
WBGene00021932	cox-18	1539	1516	1493	829	821	903	39.8585	34.411	32.1889	18.7319	17.4111	19.5347	3.70066e-28	-1.1778	down
WBGene00045208	F13E9.15	494	700	612	1673	2290	2034	33.6446	41.7305	34.7167	99.3936	127.821	115.684	3.52501e-28	1.37273	up
WBGene00011416	T04A11.1	485	434	437	1460	1463	1597	13.9478	10.9322	10.4534	36.6544	34.4911	38.3752	3.49458e-28	1.36921	up
WBGene00012819	Y43F8B.9	37	55	57	434	363	387	1.53573	1.98388	1.96369	15.7985	12.4164	13.4746	3.48364e-28	2.56436	up
WBGene00020083	R57.2	1036	1327	1604	597	530	362	37.1269	41.7041	47.8978	18.6642	15.5732	10.8225	3.45907e-28	-1.72246	down
WBGene00019658	K11H12.1	695	886	972	333	419	294	41.7126	46.575	48.5821	17.4377	20.6122	14.7168	3.18341e-28	-1.60799	down
WBGene00017422	F13C5.1	65	80	59	433	466	474	2.04907	2.23008	1.54596	12.0218	12.1483	12.5796	3.06464e-28	2.33327	up
WBGene00007886	ethe-1	125	112	97	553	686	662	4.04529	3.17791	2.63422	15.7183	18.3324	18.0264	2.80532e-28	2.10175	up
WBGene00011417	T04A11.2	221	337	270	1048	1153	1024	6.43877	8.61062	6.55683	26.7141	27.597	24.9753	2.79687e-28	1.59689	up
WBGene00003518	nac-2	270	297	354	1019	1070	1000	3.84485	4.17789	4.38643	13.6531	13.7098	11.959	2.7308e-28	1.38964	up
WBGene00016740	C48B6.2	1059	826	1157	348	451	426	45.6791	31.2124	41.5785	13.0881	15.9437	15.3279	2.13715e-28	-1.64246	down
WBGene00015776	dct-1	638	391	556	4614	4749	4572	15.5682	9.09215	11.3507	100.943	98.9962	95.4273	2.10997e-28	2.67448	up
WBGene00007638	C17D12.3	52	83	156	861	858	648	1.13322	1.59692	2.86417	16.6053	15.5376	11.9487	2.10067e-28	2.61367	up
WBGene00012858	Y44F5A.1	1273	1151	1186	525	652	511	26.3654	20.8896	20.4565	9.48993	11.0627	8.83611	1.37641e-28	-1.43967	down
WBGene00016148	C26F1.3	1182	1166	1424	671	633	500	46.58	40.2571	46.7517	23.0728	20.4543	16.4589	9.14935e-29	-1.39613	down
WBGene00022141	chaf-2	1562	1854	2044	1087	933	1119	28.2853	29.4346	30.8517	17.1803	13.8605	16.9202	8.94705e-29	-1.1315	down
WBGene00018150	epg-4	555	626	634	1583	1844	1644	11.2765	11.4071	11.053	28.1851	30.7269	27.5819	8.44688e-29	1.12746	up
WBGene00018045	F35D11.4	740	1016	935	344	292	409	32.0666	38.5844	33.734	13.1056	10.5526	15.0712	7.6953e-29	-1.68159	down
WBGene00008584	irg-4	1608	1470	1785	947	951	833	38.9928	31.5407	36.127	20.0384	18.8954	16.8575	7.37882e-29	-1.17364	down
WBGene00012953	fbxa-216	554	507	582	189	209	201	11.1642	8.95709	9.7718	3.31708	3.45169	3.38676	6.75221e-29	-1.77939	down
WBGene00023067	rpl-41.1	1026	1479	1334	428	559	628	86.0844	108.796	93.2201	31.3024	38.4522	43.9841	6.65635e-29	-1.57272	down
WBGene00003648	nhr-58	173	185	245	1140	914	803	3.74158	3.51041	4.42469	21.6128	16.2748	14.5577	6.29414e-29	1.87377	up
WBGene00016970	C56E6.2	558	609	683	187	262	238	13.2755	13.0401	13.9024	3.90278	5.23463	4.85609	5.99127e-29	-1.74966	down
WBGene00000098	air-1	1331	1546	1765	760	981	846	27.2918	27.7311	30.3711	13.5399	16.4099	14.3413	4.64029e-29	-1.17903	down
WBGene00003691	nhr-101	475	480	469	1545	1499	1401	10.15	8.99095	8.33319	28.8094	26.2656	25.0021	4.08512e-29	1.2809	up
WBGene00015424	C04E6.8	228	254	247	37	44	26	14.0111	13.6889	12.6498	1.96968	2.17832	1.30635	3.5994e-29	-2.98058	down
WBGene00003968	peb-1	1971	2669	3158	1308	1562	1183	25.3868	30.0229	33.8551	14.7085	16.4306	12.7128	3.4787e-29	-1.26993	down
WBGene00008577	F08G2.5	357	274	274	52	51	33	12.6239	8.48547	8.08858	1.60858	1.46048	0.958319	3.21327e-29	-2.96357	down
WBGene00013738	elpc-2	2196	2372	2383	1227	1567	1481	25.3349	23.8808	22.7949	12.3259	14.7911	14.2306	3.08094e-29	-1.04653	down
WBGene00008301	pals-39	29	45	19	488	642	302	0.598103	0.819813	0.329269	8.99202	11.1072	5.324	2.75606e-29	3.37756	up
WBGene00007859	mrps-31	1936	2229	2132	1250	1459	1205	38.2104	38.548	35.0333	21.5313	23.5942	19.8574	2.74867e-29	-1.03027	down
WBGene00001446	flp-3	1445	1340	1274	3754	3655	4087	46.7304	37.9884	34.3184	105.985	96.9243	110.435	2.71703e-29	1.13868	up
WBGene00004920	snr-7	1284	1626	1464	706	877	772	74.4611	82.6803	70.7422	35.7216	41.6861	37.4116	2.30532e-29	-1.23233	down
WBGene00016645	C44C1.6	246	152	161	970	1221	1094	12.6642	6.87399	6.92437	43.7135	51.6852	47.1748	2.2799e-29	2.13644	up
WBGene00016996	D1005.2	1222	1320	1741	742	788	649	21.6559	20.4902	25.6864	11.4658	11.4443	9.59493	2.06198e-29	-1.30391	down
WBGene00000967	dhs-3	2164	2628	3168	1496	1755	1648	60.7003	64.4464	73.9608	36.6222	40.2659	38.7822	1.53226e-29	-1.03371	down
WBGene00001070	dpy-8	6387	8651	11217	3071	3022	2892	117.331	139.265	171.598	49.2281	45.4892	44.3629	1.48867e-29	-1.84598	down
WBGene00000530	clh-3	346	535	582	1623	1802	1640	2.68704	3.58212	3.73494	10.9136	11.3911	10.7367	1.30894e-29	1.44293	up
WBGene00011694	T10G3.3	3238	3235	3407	1752	1655	2202	90.1541	78.9298	79.0172	42.5743	37.7628	51.2099	1.29723e-29	-1.15869	down
WBGene00016424	C34H4.1	126	171	137	627	791	809	2.83259	3.36445	2.66852	12.4121	14.6736	15.3534	1.07811e-29	1.97372	up
WBGene00019759	M03F4.6	1077	1414	1726	332	600	521	20.3141	23.3696	27.1148	5.46066	9.27322	8.20215	1.01949e-29	-1.84534	down
WBGene00021512	Y41D4B.4	1603	1471	1679	921	896	891	20.3726	16.3754	17.7604	10.2078	9.27362	9.4177	1.01844e-29	-1.15502	down
WBGene00012717	Y39E4B.6	1233	1574	1272	3539	3765	3642	21.1247	23.3387	19.1604	54.9031	49.6616	49.5566	7.90374e-30	1.06871	up
WBGene00016411	C34E10.10	1103	1205	1290	674	668	704	31.4894	30.1522	30.6826	16.8003	15.6237	16.781	7.4285e-30	-1.15295	down
WBGene00013544	Y75B8A.7	1954	1867	2039	1051	1195	1234	22.0151	18.4389	19.1377	10.3281	11.0334	11.6087	6.43096e-30	-1.09734	down
WBGene00013578	scav-2	765	853	920	2023	2317	2176	9.44235	9.21948	9.45279	21.7868	23.4493	22.4353	6.01623e-30	1.00945	up
WBGene00020194	T03G6.1	1455	2334	2836	968	876	931	34.8759	49.0459	56.6286	20.254	17.204	18.6277	5.87922e-30	-1.56251	down
WBGene00014176	ZK1010.2	1600	2009	1873	1125	1141	1021	34.2256	37.661	33.3689	20.992	19.9956	18.2375	5.01264e-30	-1.07768	down
WBGene00015044	cyp-34A9	120	152	122	686	639	676	2.05102	2.26855	1.70393	10.2714	8.99758	9.61504	4.47943e-30	1.96068	up
WBGene00007336	C05C12.4	1216	1391	1344	3828	3669	3076	33.746	33.8402	31.0656	92.7257	83.5014	71.3215	4.099e-30	1.06694	up
WBGene00012750	faah-6	276	265	220	994	1178	1112	4.58784	3.86002	3.04295	14.4421	16.0668	15.4548	3.51862e-30	1.72598	up
WBGene00015104	B0280.9	3267	3576	3304	1700	2090	2221	64.9035	62.2476	54.6503	29.4664	34.0247	36.8373	3.1233e-30	-1.10187	down
WBGene00007749	ceh-79	220	267	240	946	914	932	3.54831	3.9423	3.34318	13.8692	12.4308	13.1689	2.45385e-30	1.5762	up
WBGene00001773	gst-25	33	40	32	359	334	355	1.3716	1.48169	1.11753	13.4083	11.7167	12.6868	1.82562e-30	2.85604	up
WBGene00011247	mrpl-49	1608	1890	1828	989	905	1099	68.5067	70.6015	64.8787	36.7553	31.5952	39.1101	1.57455e-30	-1.16959	down
WBGene00008409	mpst-1	1733	1524	1957	975	938	929	44.5766	34.3493	41.9408	21.8942	19.7804	19.9587	1.09538e-30	-1.21533	down
WBGene00018403	F44A2.3	529	479	534	1672	1661	2097	7.12796	5.65844	5.99529	19.67	18.3595	23.616	1.04273e-30	1.45122	up
WBGene00017582	F18G5.6	559	766	873	2347	2362	2059	16.667	20.0156	21.662	61.0502	57.7271	51.2734	1.03708e-30	1.27713	up
WBGene00002275	lem-2	2061	2031	2076	1198	1321	1279	31.47	27.1722	26.3982	15.9625	16.5263	16.3036	9.96654e-31	-1.04702	down
WBGene00020702	T22F7.3	878	1231	1654	398	404	512	7.29074	8.95351	11.4369	2.88321	2.74621	3.54945	8.52638e-31	-1.81719	down
WBGene00004933	sod-4	628	567	627	1989	2337	1766	22.0799	17.5875	18.0352	62.1771	68.0246	53.0179	5.85866e-31	1.37541	up
WBGene00008476	E03H4.8	218	208	285	905	1001	1166	3.88373	3.25718	4.23114	14.1104	14.6596	17.395	5.78174e-31	1.74401	up
WBGene00045338	M01B2.13	0	0	0	262	257	143	0	0	0	7.39116	6.81067	3.8652	5.39534e-31	6.14961	up
WBGene00012491	Y20C6A.1	225	174	229	932	967	887	1.96826	1.31891	1.7068	7.27028	7.12509	6.56051	5.34275e-31	1.77205	up
WBGene00001157	ech-8	185	297	247	980	1089	1031	3.54472	4.98217	3.94168	16.3938	17.1208	16.5027	5.17708e-31	1.72321	up
WBGene00015449	ugt-63	507	674	656	183	204	239	9.02233	10.5064	9.7264	2.83293	2.97414	3.55266	4.99575e-31	-1.86539	down
WBGene00000391	cdd-1	983	1059	1013	496	525	439	30.2343	28.5484	25.9611	13.306	13.2272	11.2836	4.68983e-31	-1.40393	down
WBGene00004157	pqn-75	685	884	986	2262	2622	2943	11.8205	13.3748	14.1668	34.09	37.4057	42.454	4.36717e-31	1.26694	up
WBGene00008239	fshr-1	955	914	1076	2499	2583	2514	8.45611	7.09554	7.93681	19.3218	18.7599	18.5966	4.01999e-31	1.01441	up
WBGene00008335	C55A6.6	475	542	581	1635	1958	1509	14.209	14.2014	14.487	42.7085	48.0576	37.7255	3.91742e-31	1.31812	up
WBGene00016360	C33G8.2	44	48	45	416	397	363	0.875038	0.823075	0.740559	7.22194	6.47156	6.04033	3.8134e-31	2.66365	up
WBGene00007228	acs-7	227	429	388	1380	1638	1563	3.70495	6.15126	5.29352	19.7265	21.9966	21.3871	3.00746e-31	1.77397	up
WBGene00019525	K08D9.4	44	75	81	661	628	426	1.18546	1.77368	1.83173	16.0273	14.4425	9.97869	2.85136e-31	2.6761	up
WBGene00000298	cat-4	742	878	838	2201	2157	2179	23.0502	23.9112	21.6961	59.7036	54.9436	56.5663	2.44326e-31	1.05956	up
WBGene00003643	nhr-53	70	99	79	538	516	531	1.65907	2.08118	1.56198	11.2626	10.144	10.6473	2.37767e-31	2.27649	up
WBGene00004156	pqn-74	2647	4131	4222	2056	1869	1860	49.0173	67.0399	65.1117	33.2422	28.9985	28.7811	2.31356e-31	-1.25091	down
WBGene00009534	F38B7.3	754	754	781	2049	2351	2048	13.1234	11.495	11.3244	31.1224	33.5535	29.7867	2.06109e-31	1.13606	up
WBGene00013532	Y73F8A.27	1266	1454	1426	753	773	826	45.872	46.1623	43.0245	23.8041	22.9581	24.9767	1.85135e-31	-1.15796	down
WBGene00018353	fbxa-182	53	30	52	603	783	365	0.673218	0.335757	0.556855	6.78508	8.27343	3.92097	1.51768e-31	3.18359	up
WBGene00010437	cox-11	1226	1270	1483	762	697	654	36.0588	32.7453	36.3569	19.5933	16.8387	18.2188	1.39659e-31	-1.2489	down
WBGene00005228	srh-2	9	12	4	251	310	218	0.186937	0.26732	0.059591	5.0252	5.99882	4.48782	1.33585e-31	4.19556	up
WBGene00009554	F39B2.3	327	336	396	1258	1168	1441	8.13509	7.32377	8.2096	27.3614	23.8601	29.9831	1.22063e-31	1.5095	up
WBGene00004185	pro-1	1424	1426	1543	866	812	775	23.1178	20.2843	20.8574	12.258	10.8012	10.5053	1.19409e-31	-1.18207	down
WBGene00012364	zmp-4	619	829	850	2141	2261	2064	12.7634	15.5131	14.0701	41.0155	40.7807	36.6372	1.1673e-31	1.14518	up
WBGene00015329	C02B10.4	2114	2135	2374	1283	1367	1486	66.6069	58.946	62.2798	35.2796	35.3068	39.086	1.09296e-31	-1.0226	down
WBGene00014206	nit-1	486	414	423	1607	1575	1909	13.1394	9.84286	9.69393	38.2168	34.9614	43.7941	9.58916e-32	1.57074	up
WBGene00015271	C01B4.7	307	295	421	1602	1475	1185	5.95118	5.01861	6.81224	27.5139	23.522	19.2764	9.38236e-32	1.69651	up
WBGene00045401	eol-1	40	21	29	478	724	317	1.0034	0.516209	0.678121	11.8237	16.8578	7.49377	8.39156e-32	3.49849	up
WBGene00016234	C29G2.6	174	204	255	848	1079	874	6.92475	7.08385	8.43301	29.465	35.2096	29.039	7.81789e-32	1.77925	up
WBGene00003632	nhr-42	556	597	587	1661	1747	1649	13.8264	13.0272	12.1588	36.0963	35.6602	34.2969	6.92312e-32	1.18252	up
WBGene00013217	ddl-3	2265	2241	2446	1335	1413	1545	47.8474	41.4932	43.0288	24.6012	24.4493	27.2437	6.15721e-32	-1.04009	down
WBGene00016655	acbp-1	2683	3566	3175	1655	2074	1834	188.481	219.319	183.869	96.387	117.615	106.252	5.14719e-32	-1.10133	down
WBGene00003154	mcm-2	2661	2730	3360	1538	1826	1917	26.1639	23.524	27.5204	13.1959	14.7141	15.7341	5.14719e-32	-1.06785	down
WBGene00022386	Y95B8A.6	331	434	488	1342	1403	1467	6.48522	7.09763	8.69186	22.1489	23.5525	24.1986	4.40394e-32	1.39877	up
Caenorhabditis_elegans_newGene_74	-	1205	1227	1215	628	637	548	15.3948	13.8561	13.0237	6.99663	6.75306	5.89877	3.14384e-32	-1.34966	down
WBGene00011817	T16H12.9	260	288	248	1041	1028	1178	7.56564	7.34971	6.00138	26.4526	24.5412	28.6561	3.13385e-32	1.65733	up
WBGene00010019	F54B8.4	24	31	29	349	396	289	1.73858	2.02233	1.78766	21.7479	23.1324	17.2797	3.133e-32	3.13042	up
WBGene00013673	Y105E8A.13	582	789	818	220	287	278	16.9488	20.1984	19.9185	5.5985	6.82379	6.77794	2.30929e-32	-1.79484	down
Caenorhabditis_elegans_newGene_1375	-	260	303	262	47	44	39	3.53472	3.74801	2.99254	0.59802	0.715189	0.437497	2.15227e-32	-2.90367	down
WBGene00016111	C25H3.1	0	4	6	201	249	237	0	0.090905	0.115439	4.58664	5.34126	5.18124	2.06804e-32	4.97489	up
WBGene00017379	F11C7.7	190	224	250	810	1072	1083	11.2109	11.5597	12.3123	41.7909	51.9448	53.4736	2.05592e-32	1.78964	up
WBGene00018260	cyp-33C7	256	176	223	1011	1134	1068	4.68494	2.81475	3.39869	16.1525	17.0165	16.3285	1.66524e-32	1.90561	up
WBGene00010039	F54C8.6	339	414	394	1495	1328	1251	10.1666	11.1535	9.94503	39.0309	32.8326	31.3768	1.57475e-32	1.47031	up
WBGene00022474	zig-9	703	689	772	1915	2082	2153	15.5937	13.3873	14.2576	37.052	37.8456	39.878	1.41185e-32	1.15155	up
WBGene00022493	mrpl-45	2375	2662	2988	1745	1444	1607	33.5188	32.9252	35.1197	21.4828	16.7019	18.9353	1.16444e-32	-1.07869	down
WBGene00009132	F25H8.2	1161	1352	1447	741	734	756	22.9385	23.4063	23.8131	12.7696	11.8811	12.4806	1.10869e-32	-1.1644	down
WBGene00012070	T26H5.8	24	49	37	421	469	349	0.484803	0.898604	0.64789	7.87488	8.24723	6.24998	1.09674e-32	3.02558	up
WBGene00007340	C05D12.2	353	309	339	1151	1353	1297	3.11625	2.39089	2.49535	8.87898	9.80149	9.56969	1.0475e-32	1.55455	up
WBGene00010628	ceeh-2	102	177	206	820	1045	899	2.01373	3.08522	3.40685	14.234	17.04	14.9302	8.97213e-33	2.13654	up
WBGene00007312	C04H5.1	1468	1594	1856	864	757	939	64.9536	61.8118	68.373	33.343	27.4269	34.6879	8.17688e-33	-1.27477	down
WBGene00013647	Y105C5B.5	273	309	228	1114	1204	1316	15.4424	15.3425	10.7261	55.1232	55.9374	62.3137	7.96385e-33	1.78539	up
WBGene00011673	cyp-13A6	26	31	37	377	341	334	0.424408	0.449919	0.515489	5.51323	4.68409	4.67977	7.41843e-33	3.01783	up
WBGene00002069	ikb-1	449	538	538	1868	2264	1535	6.20381	6.50772	6.18863	22.5255	25.6398	17.7086	7.29456e-33	1.53113	up
WBGene00020256	T05C3.6	711	700	854	193	264	294	12.2186	10.3075	11.9127	2.8125	3.64582	4.11066	7.18995e-33	-1.90983	down
WBGene00008211	C49F5.7	115	105	104	580	636	667	7.85136	6.23268	5.86327	34.5042	35.5882	38.02	7.1646e-33	2.14249	up
WBGene00009710	F44G3.10	327	397	516	96	101	94	18.2328	19.4543	23.9936	4.65646	4.61713	4.38817	6.28418e-33	-2.36835	down
WBGene00000765	coq-5	1951	2305	2341	1359	1230	1406	56.014	57.9955	55.9654	34.0405	28.9437	33.711	6.00639e-33	-1.06214	down
WBGene00010251	sta-2	579	495	511	1970	1882	1767	8.85294	6.6391	6.5008	26.303	23.6082	22.5826	4.48871e-33	1.45664	up
WBGene00018731	F53A9.8	725	925	991	2298	3093	3029	59.4252	66.4547	67.6263	164.384	207.822	207.375	4.29993e-33	1.32063	up
WBGene00016456	C35E7.4	1066	1063	1039	2788	3166	2807	13.6996	11.969	11.1166	31.2751	33.3554	30.131	3.64492e-33	1.10813	up
WBGene00021703	cpt-3	6	0	5	288	248	205	0.065586	0	0.042535	3.18919	2.57624	2.17168	3.59976e-33	4.96627	up
WBGene00007240	C01G10.15	1171	1425	1302	527	668	659	87.6958	93.5471	81.2199	34.4456	40.9726	41.2165	3.27407e-33	-1.40921	down
WBGene00012545	Y37D8A.3	1570	1738	2290	937	1047	1002	40.8854	39.6554	49.6576	21.2935	22.3515	21.782	2.90436e-33	-1.23736	down
WBGene00010115	aakb-1	822	1053	980	2710	2626	2484	19.5585	21.9655	19.4237	56.3199	51.2469	49.4011	2.86646e-33	1.10371	up
WBGene00022851	ZK1127.4	2036	2213	2171	1216	1162	1357	48.6986	46.383	43.2272	25.374	22.7777	27.0968	2.59378e-33	-1.12408	down
WBGene00271795	Y46C8AM.1	55	56	41	419	468	595	2.0423	1.88944	1.30186	13.9239	14.5388	18.8807	2.56856e-33	2.82845	up
WBGene00009797	F46G10.2	904	1187	1278	2842	3109	2958	10.3727	11.9292	12.2864	28.6315	29.4716	28.6129	2.53298e-33	1.05818	up
WBGene00020499	mrps-18.C	1314	1408	1564	563	734	763	74.0356	69.5284	73.4186	27.6866	33.8786	35.9241	2.47369e-33	-1.39286	down
WBGene00010812	mrpl-35	1538	1504	1770	754	926	895	74.3133	63.6902	71.2524	31.7802	36.6561	36.1045	2.41292e-33	-1.2427	down
WBGene00020237	phat-4	1213	1656	2091	730	616	704	37.7391	45.1562	54.1912	19.8058	15.7029	18.285	1.88408e-33	-1.58713	down
WBGene00018781	F54A3.2	1511	1570	1812	988	939	902	16.0074	14.5732	15.989	9.12661	8.14826	7.97708	1.85729e-33	-1.12938	down
WBGene00012977	Y48A6C.4	1917	2120	1975	1143	1267	1162	32.382	31.3887	27.7785	16.8468	17.5443	16.3851	1.62921e-33	-1.09692	down
WBGene00021430	Y38F2AR.12	1408	1212	1516	3606	3884	4044	11.0009	7.96023	9.76785	22.9976	23.3914	24.9432	1.53815e-33	1.12326	up
WBGene00050939	C05G5.7	847	1079	1224	292	415	437	28.1052	31.3855	33.8333	8.43693	11.2839	12.1112	1.50502e-33	-1.77761	down
WBGene00019368	txt-4	1305	1355	1543	684	530	690	33.8877	31.287	33.5196	15.2267	11.0941	14.698	1.30693e-33	-1.47245	down
WBGene00017428	F13D11.3	327	234	339	1467	1470	1212	14.183	8.87927	12.2432	55.587	52.2937	43.945	1.14191e-33	1.82704	up
WBGene00015245	B0524.6	1454	1563	1981	904	905	936	40.3499	38.0124	45.8056	21.8811	20.5885	21.6958	1.13434e-33	-1.19777	down
WBGene00013151	nsun-5	1091	1139	1016	457	388	473	21.2597	19.207	16.485	7.7298	6.16401	7.67361	1.01482e-33	-1.6348	down
WBGene00000977	dhs-14	59	38	42	464	441	475	1.70268	0.954427	1.00804	11.7397	10.4676	11.5035	9.01886e-34	2.85085	up
WBGene00022307	nadk-1	1254	1328	1547	3322	4040	3391	27.2221	25.2615	27.9601	62.9418	71.9041	61.4783	8.63227e-34	1.03016	up
WBGene00018874	tag-234	146	216	244	930	1041	883	8.78129	11.3003	12.0834	46.9423	49.5879	43.3295	8.56076e-34	1.87198	up
WBGene00009820	F47B10.9	38	63	84	554	623	465	1.07083	1.55772	1.97951	13.8034	14.5861	11.0832	8.31203e-34	2.73041	up
WBGene00007201	exos-4.1	1303	1679	1746	799	863	666	39.7339	44.8814	44.3576	21.2645	21.5812	16.9671	8.04938e-34	-1.35351	down
WBGene00008647	F10C2.7	22	18	28	441	308	323	0.435185	0.307095	0.470149	7.75909	5.08201	5.42824	7.09212e-34	3.44966	up
WBGene00019148	H03E18.1	2649	3719	4566	1688	1883	1938	19.8522	24.4234	28.5016	11.0386	11.5654	12.1311	6.92316e-34	-1.31101	down
WBGene00011495	T05F1.11	656	593	743	2116	2193	1910	5.77222	4.57453	5.4494	16.2592	15.8303	14.0472	5.0634e-34	1.28552	up
WBGene00020326	math-38	277	294	284	1081	1207	1023	5.71705	5.31783	4.88332	19.4945	20.4517	17.6592	4.68528e-34	1.58594	up
WBGene00020296	rrp-8	2148	2421	2426	1479	1239	1236	49.4489	48.8394	46.5076	29.6995	23.3744	23.7518	3.89583e-34	-1.1622	down
WBGene00003710	nhr-120	715	799	896	2206	2327	2060	11.8079	11.565	12.319	31.7995	31.5062	28.4211	3.87817e-34	1.10223	up
WBGene00013382	gcl-1	567	575	627	1859	1734	1748	8.2645	7.34311	7.61801	23.6763	20.7419	21.3071	3.34962e-34	1.23925	up
WBGene00009877	F49C12.7	212	274	308	1186	1032	1058	4.01819	4.40438	4.80328	19.5826	15.9913	16.5479	3.30622e-34	1.68736	up
WBGene00012992	mrpl-20	1275	1554	1550	761	739	837	53.9967	57.6779	54.6613	28.1173	25.6445	29.5939	2.84972e-34	-1.24176	down
WBGene00019489	K07E1.1	932	910	790	2761	2943	2765	33.4373	28.3392	23.6859	86.0212	86.0076	83.2693	2.60387e-34	1.31887	up
WBGene00021354	fpn-1.1	968	1179	1259	504	612	518	15.7433	16.7784	17.0894	7.15048	8.17943	7.01616	2.57284e-34	-1.39228	down
WBGene00001623	glt-5	210	235	286	954	975	996	3.25498	3.19251	3.70015	12.9354	12.4298	12.9259	1.93015e-34	1.64113	up
WBGene00015266	BE0003N10.1	1487	1380	1597	779	796	799	16.8865	13.7362	15.1001	7.71182	7.40443	7.57634	1.8688e-34	-1.25307	down
WBGene00015250	B0546.3	884	1111	1030	2717	2894	2586	17.9647	19.7929	17.6683	48.2601	48.8583	43.8016	1.69554e-34	1.0869	up
WBGene00006986	zip-1	897	1056	990	2812	2709	2542	14.1826	15.2444	12.3691	36.5985	33.4746	31.6864	1.02409e-34	1.10159	up
WBGene00013485	Y69H2.10	82	148	141	739	851	702	1.33961	2.14205	1.85638	10.334	11.6859	9.40341	1.01185e-34	2.24432	up
WBGene00009803	F47B8.2	472	371	490	1608	1763	1612	18.5183	12.7523	16.0185	55.1548	56.8076	52.9185	8.73004e-35	1.53559	up
WBGene00012641	epg-6	831	721	981	2559	2741	2486	18.4744	14.3943	18.9034	49.7452	50.4436	45.8188	8.67387e-35	1.26473	up
WBGene00013643	Y105C5A.24	593	539	655	1766	1914	1944	9.56881	7.61979	8.80229	24.8706	25.3108	26.1948	8.29981e-35	1.29638	up
WBGene00013901	ugt-16	1620	1567	1631	657	875	635	25.2104	21.3731	21.1474	8.91638	11.1628	8.25562	6.78667e-35	-1.49467	down
WBGene00007923	C34C12.4	536	582	568	1648	2000	1736	23.9595	22.8524	20.6345	61.0727	73.1417	64.692	6.20948e-35	1.31523	up
WBGene00007130	B0272.4	213	292	304	1016	1204	1076	6.09008	7.33241	7.25526	25.4282	28.2966	25.7682	4.37342e-35	1.66695	up
WBGene00020031	suco-1	2264	2151	2314	6381	6777	5340	21.8637	18.1987	18.6033	53.7693	53.6431	43.0669	3.31794e-35	1.10098	up
WBGene00018431	F44E7.9	1637	1593	1755	915	787	875	87.9821	75.0317	78.5355	42.8955	34.6501	39.2734	3.09131e-35	-1.29173	down
WBGene00017127	E04F6.8	156	109	94	830	1036	834	9.4748	5.80333	4.76412	44.2037	51.8429	42.5329	2.94857e-35	2.47835	up
WBGene00017484	F15E6.3	21	23	33	426	564	293	1.09229	1.05436	1.45572	20.2112	25.1236	13.2805	2.82516e-35	3.5235	up
WBGene00010274	F58G6.3	958	1066	975	443	344	359	63.3839	61.7797	53.7206	25.5355	18.6417	19.798	2.56211e-35	-1.71654	down
WBGene00013477	Y69E1A.5	471	446	476	2019	1893	1503	20.3492	16.9045	17.054	76.2416	67.0156	54.1769	2.38411e-35	1.59164	up
WBGene00007764	C27B7.7	440	406	529	1769	2032	1494	2.70139	2.18325	2.70524	9.48871	10.241	7.66926	2.18828e-35	1.58207	up
WBGene00018952	F56C9.8	1003	882	1124	3083	3152	2764	22.6583	17.452	21.1452	60.778	58.37	52.1485	1.35118e-35	1.22455	up
WBGene00021828	Y54E10A.6	2071	1775	2148	991	1093	1036	28.4914	21.3963	24.6118	11.8878	12.3219	11.8955	1.21962e-35	-1.28635	down
WBGene00021348	moag-4	2553	3073	2847	1823	1745	1635	153.002	161.559	142.211	94.5007	85.5318	81.8287	1.08186e-35	-1.04596	down
WBGene00012970	Y48A6B.9	103	117	111	618	637	782	2.30021	2.28174	2.03929	12.0213	11.6265	14.5633	1.06536e-35	2.22993	up
WBGene00011166	chil-22	212	239	218	1064	1020	897	3.98264	3.92856	3.40047	17.4342	15.6975	14.0666	8.14947e-36	1.78437	up
WBGene00011559	umps-1	2395	3107	3105	1731	1681	1839	39.0569	44.1403	42.0311	24.6185	22.4615	24.9638	7.83693e-36	-1.0495	down
WBGene00016892	pgph-3	393	362	592	4374	4597	6312	8.71636	7.03866	10.9416	84.7289	83.6318	117.011	7.28008e-36	3.05138	up
WBGene00001702	grd-13	1591	1681	1612	3887	4667	4509	72.8134	67.4198	61.4341	155.277	175.126	172.407	7.26053e-36	1.06222	up
WBGene00019652	cest-34	131	133	162	809	761	682	2.11406	1.88051	2.17604	11.4095	10.0821	9.20609	6.86638e-36	2.02547	up
WBGene00017133	EEED8.2	43	51	65	507	448	444	1.25286	1.29587	1.58999	13.0725	10.856	10.9399	6.04417e-36	2.71735	up
WBGene00004918	snr-5	1102	1403	1414	572	696	645	87.217	97.3466	93.2391	39.4649	45.1254	42.6047	5.62388e-36	-1.3684	down
WBGene00003664	nhr-74	1591	1955	2134	942	1154	952	41.1271	44.2848	45.9374	21.2312	24.4553	20.5467	4.84221e-36	-1.23338	down
WBGene00011450	ttr-22	187	184	176	962	957	801	10.6006	9.16161	8.30177	47.6878	44.5809	38.0045	4.81553e-36	1.93316	up
WBGene00021061	W06E11.1	1865	1879	2089	1064	1193	1187	33.4594	29.5423	31.2113	16.6493	17.5351	17.7741	4.64255e-36	-1.1037	down
WBGene00017336	ugt-41	150	140	205	790	857	912	2.31699	1.8945	2.63538	10.6791	10.8849	11.7949	4.62415e-36	1.99691	up
WBGene00001309	emr-1	1446	2104	2009	810	946	931	61.1638	77.9911	70.7729	29.8768	32.8012	32.8729	4.36826e-36	-1.37864	down
Caenorhabditis_elegans_newGene_1370	-	407	396	489	1363	1592	1508	5.11165	3.55563	6.37523	12.5956	14.0892	13.9758	4.24984e-36	1.43043	up
WBGene00003059	lpd-2	1106	1220	1296	588	662	553	28.8804	27.9224	28.1819	13.3953	14.166	12.0603	2.64354e-36	-1.34418	down
WBGene00014233	ZK1128.7	403	455	509	1532	1749	1413	12.9922	12.2616	13.742	41.7002	42.1646	34.5507	2.51874e-36	1.42384	up
Caenorhabditis_elegans_newGene_1675	-	91	101	124	605	675	604	1.02924	0.634859	0.970898	4.91547	5.06607	4.15053	1.88487e-36	2.19187	up
WBGene00019715	M01G5.1	1525	1679	1682	944	941	920	12.2833	11.8534	11.284	6.63081	6.2122	6.18606	1.8274e-36	-1.14291	down
WBGene00002060	ife-2	3777	4364	4677	2350	2283	2882	119.013	120.506	122.732	64.6048	58.9567	75.8335	1.63263e-36	-1.10788	down
WBGene00018427	F44E7.5	419	590	559	144	123	141	7.17808	8.87342	7.98991	2.14448	1.73233	2.02028	1.56991e-36	-2.23782	down
WBGene00001811	haf-1	214	248	348	1107	1240	1202	2.81154	2.84687	3.80333	12.6877	13.3533	13.1883	1.44466e-36	1.77363	up
WBGene00018696	pho-6	327	349	303	1285	1340	1632	8.11795	7.58978	6.25163	27.8343	27.2673	33.854	1.30425e-36	1.74734	up
WBGene00004914	snr-1	2312	2776	3343	1585	1761	1532	95.0501	100.021	114.466	56.8356	59.34	52.6052	1.24401e-36	-1.12297	down
WBGene00021020	W04B5.3	1849	2080	2245	1095	1301	1261	32.1759	32.1898	32.721	16.2318	19.418	17.8775	1.04465e-36	-1.09638	down
WBGene00044696	F52E1.14	1778	1971	1963	1107	1154	1171	71.2031	69.1694	65.4399	38.6838	37.8765	39.1554	1.03925e-36	-1.07833	down
WBGene00000535	cpi-1	297	304	373	1428	1436	1138	14.8034	13.2985	15.5059	62.2592	58.8205	47.4822	6.62502e-37	1.67657	up
WBGene00000133	amt-1	34	40	45	439	474	364	0.531487	0.555214	0.597586	6.15803	6.24807	4.88165	6.44864e-37	2.97433	up
WBGene00009621	fipr-21	3298	4703	4732	2259	2214	2558	207.83	259.749	248.329	124.228	114.349	134.617	5.73663e-37	-1.18733	down
WBGene00015268	BE0003N10.3	822	992	1229	318	382	420	9.34266	9.88451	11.6433	3.1509	3.55969	3.98834	5.43003e-37	-1.75902	down
WBGene00011524	plpr-1	1014	1352	1295	475	463	578	18.2736	21.3497	19.4266	7.46532	6.83355	8.69154	4.69485e-37	-1.59789	down
WBGene00000941	ddp-1	2076	2405	2243	1072	1110	1328	142.783	144.94	128.506	64.3207	62.5741	76.2767	3.90327e-37	-1.27831	down
WBGene00007358	lact-6	14	22	22	376	530	285	0.18068	0.252891	0.242592	4.45049	5.894	3.22137	3.66945e-37	3.78591	up
WBGene00010925	mfsd-11	955	1084	1209	463	552	453	18.9056	18.808	19.9387	8.00059	8.94922	7.48979	2.45226e-37	-1.47837	down
WBGene00015172	B0410.3	705	672	750	2400	2683	2061	23.8809	19.9386	21.1483	70.9823	74.5403	58.3315	2.02693e-37	1.38678	up
WBGene00015602	fbxa-158	0	4	0	321	326	215	0	0.073413	0	6.585	6.27823	4.22768	1.88222e-37	5.9013	up
WBGene00010001	F53F8.4	2585	2270	2344	6578	7054	7886	75.0661	57.7505	56.6764	166.689	167.921	191.259	1.87242e-37	1.21614	up
WBGene00013129	Y52B11A.10	2589	2707	3126	1597	1911	1747	28.0824	25.7267	28.2385	15.1125	16.9929	15.8204	1.49235e-37	-1.0231	down
WBGene00008934	F18C12.3	1753	1794	2019	1110	1090	1056	28.3808	25.4529	27.223	15.6777	14.4626	14.2845	1.46246e-37	-1.11513	down
WBGene00020717	mrpl-4	1899	2337	2426	1371	1374	1292	52.2004	56.2791	55.5242	32.8696	30.9549	29.6503	1.29579e-37	-1.06074	down
WBGene00006889	pfd-3	2646	2877	3038	1671	1988	1663	84.5307	80.5385	80.8184	46.5777	52.0357	44.3547	1.23571e-37	-1.03023	down
WBGene00000796	crn-3	3351	3603	3497	2290	2284	2069	34.1576	32.1852	29.6829	20.3711	19.0769	17.615	1.12959e-37	-1.00037	down
WBGene00012686	Y39B6A.27	193	166	188	857	903	949	3.68029	2.77644	2.9831	14.2777	14.1305	15.1267	1.07933e-37	1.92926	up
WBGene00011097	nhr-206	64	81	81	682	617	496	1.22855	1.36398	1.30972	11.7546	10.0657	8.0475	5.88602e-38	2.58142	up
WBGene00018346	F42C5.4	162	147	160	929	934	744	2.04852	1.62833	1.68709	10.2931	9.71913	7.78276	5.76482e-38	2.08906	up
WBGene00007599	C15A11.7	374	477	537	1558	1629	1846	6.23087	6.97277	7.46059	22.6826	22.2875	25.7278	4.12933e-38	1.507	up
WBGene00001782	gst-34	36	24	29	415	376	419	1.51892	0.871217	1.00849	15.3059	13.0096	14.7865	4.1009e-38	3.27317	up
WBGene00019421	K05F6.10	244	240	211	1004	1128	1155	4.97103	4.28725	3.58421	17.8677	18.8579	19.6785	4.08287e-38	1.86225	up
WBGene00000623	col-46	862	1104	1411	328	436	293	21.5139	24.1525	29.3323	7.14193	8.92128	6.10875	3.49944e-38	-1.98313	down
WBGene00019146	H02F09.3	413	356	454	60	51	84	2.99641	2.25992	2.74017	0.376895	0.297774	0.505532	3.23543e-38	-2.90312	down
WBGene00010230	rpac-19	1129	1137	1309	575	556	477	56.5026	50.0209	54.6023	25.2066	22.9301	20.0634	3.21542e-38	-1.4874	down
WBGene00021813	Y53G8AR.6	1745	1944	2009	1034	1129	1166	37.4195	36.5217	35.8653	19.3481	19.8303	20.879	2.75808e-38	-1.11726	down
WBGene00000202	exos-4.2	1511	1545	1782	841	754	869	47.1622	42.2769	46.3431	22.9172	19.2968	22.6609	2.71299e-38	-1.3101	down
WBGene00010042	bcs-1	1685	2060	2136	1036	925	1107	33.474	35.9468	35.4235	17.7665	15.096	18.4611	2.67355e-38	-1.27261	down
WBGene00003409	mrp-3	436	507	513	1653	1731	1487	2.65289	2.70392	2.59748	8.78149	8.63606	7.55729	2.56521e-38	1.3865	up
WBGene00019203	ttr-47	933	980	883	2704	3300	2882	47.3095	43.556	37.2847	119.665	137.154	122.037	2.5182e-38	1.30512	up
WBGene00000780	cpn-4	1953	2422	2283	1295	1150	1091	94.8537	103.101	92.3585	54.8798	45.7792	44.2668	2.01755e-38	-1.25038	down
WBGene00012216	W02D9.10	1226	1233	1569	3915	3732	3507	43.1744	38.0554	46.0294	120.327	107.748	103.171	1.50923e-38	1.12168	up
WBGene00008334	sdz-8	437	413	434	1544	1576	1876	14.543	12.043	12.0102	44.8371	42.981	52.132	1.30107e-38	1.59423	up
WBGene00010231	F58B3.4	2953	3000	3427	1934	1589	1587	43.7376	38.9297	42.2419	24.9851	19.2769	19.6099	1.16615e-38	-1.21479	down
WBGene00009215	thn-2	167	101	142	901	960	919	5.7502	3.04096	4.07457	28.399	27.7148	28.0455	1.08107e-38	2.35452	up
WBGene00018351	F42G2.2	535	553	600	1932	2022	1673	7.72084	7.05335	7.01416	24.4635	24.0936	19.6266	9.63438e-39	1.37953	up
WBGene00013207	zipt-2.3	254	339	358	30	51	38	6.3492	7.43221	7.46495	0.651758	1.0356	0.792476	8.65254e-39	-3.21318	down
WBGene00013906	ugt-5	251	289	365	1243	1352	1144	4.19597	4.27006	5.0867	18.1696	18.5729	16.0578	7.13085e-39	1.68923	up
WBGene00022181	pho-9	43	60	73	516	613	474	0.911864	1.12341	1.29202	9.6217	10.7429	8.46161	5.44946e-39	2.76937	up
WBGene00020465	T12E12.6	482	757	854	141	153	188	6.09677	8.39912	8.99939	1.5546	1.58542	1.98245	4.95954e-39	-2.3983	down
WBGene00010790	sodh-1	13210	10937	12596	52415	58909	53710	280.913	203.809	223.077	972.631	1026.81	953.906	3.7995e-39	1.78966	up
WBGene00007223	C01F6.9	1771	1890	1857	868	1010	1028	131.218	122.71	114.579	56.1008	61.3066	63.5844	3.53676e-39	-1.26889	down
WBGene00013260	rsr-2	2038	2357	2348	1338	1409	1419	42.8317	43.4093	41.103	24.5464	24.2798	24.9154	3.46178e-39	-1.03732	down
WBGene00017319	mrps-9	3147	3267	3322	1749	2142	1971	67.8431	61.7237	59.6506	32.8952	37.8456	35.4846	2.71194e-39	-1.07927	down
WBGene00011076	scav-5	1154	1432	1385	647	633	665	18.3159	19.9091	18.2969	8.94893	8.22636	8.81128	2.01287e-39	-1.36499	down
WBGene00020037	mrps-6	2547	2710	2890	1758	1740	1570	94.1185	87.7445	88.929	56.669	52.6881	48.4506	1.98601e-39	-1.02832	down
WBGene00020700	T22F3.11	96	63	74	692	661	621	1.57233	0.906175	1.01241	9.96931	8.9446	8.55371	1.57065e-39	2.65583	up
WBGene00007536	daf-36	859	1035	1029	290	418	350	16.6768	17.6069	16.6387	4.90118	6.65072	5.66376	1.44551e-39	-1.79341	down
Caenorhabditis_elegans_newGene_2079	-	328	360	385	1415	1509	1222	2.31914	2.56018	2.31267	9.14055	9.29947	7.77939	1.40679e-39	1.58932	up
WBGene00000534	cpi-2	1331	1709	1992	4438	4633	4610	60.8901	65.8271	75.3816	170.846	166.912	176.45	9.16146e-40	1.10124	up
WBGene00013594	Y87G2A.2	184	202	207	877	912	1002	5.38824	5.18445	5.03914	22.4101	21.8746	24.4902	8.42795e-40	1.86511	up
WBGene00001028	dnj-10	3184	3413	3368	1958	2236	1876	54.5257	51.2324	48.1009	29.0843	31.5656	26.7596	7.95628e-40	-1.06219	down
WBGene00001815	hmt-1	1952	1923	2172	983	935	1134	21.0038	18.1257	19.4632	9.22937	8.24316	10.1849	6.95921e-40	-1.32586	down
WBGene00021757	taco-1	1993	2171	2136	1131	984	1156	50.3103	48.0122	44.8896	24.9079	20.3503	24.3572	5.06811e-40	-1.28594	down
WBGene00007394	C06H5.6	1504	1760	1857	929	1001	974	23.6353	24.2196	24.2974	12.7261	12.8819	12.7881	4.81039e-40	-1.15738	down
WBGene00021977	Y58A7A.3	76	109	87	687	606	685	0.743233	0.932294	0.715234	5.94066	4.91876	5.6693	4.04753e-40	2.46512	up
WBGene00021133	tomm-22	3432	3161	3426	1933	2019	1818	205.785	166.496	169.278	102.831	98.1068	90.0098	3.02671e-40	-1.14439	down
WBGene00019279	K01A2.4	2029	1918	2267	977	1191	1079	42.8084	35.4645	39.8269	17.9772	20.5921	19.0033	2.99387e-40	-1.27933	down
WBGene00018101	math-27	304	469	389	1730	1582	1598	3.42196	4.57295	3.62234	17.1974	14.3704	15.0745	2.79483e-40	1.7205	up
WBGene00019800	mtss-1	2384	3221	2704	1134	1319	1459	107.714	127.544	101.748	44.7015	48.8415	55.0612	2.5915e-40	-1.42361	down
WBGene00007195	thoc-7	1398	1340	1519	614	642	719	54.4033	45.3193	49.1787	20.4447	20.4016	23.4198	2.19309e-40	-1.44693	down
WBGene00011850	T20B3.1	417	323	410	1543	1644	1764	5.8556	3.97697	4.79036	18.9248	18.9337	20.7097	2.06956e-40	1.73471	up
WBGene00008575	scl-24	106	77	112	655	723	825	4.60422	2.93034	4.05034	24.8512	25.7558	29.9609	2.02541e-40	2.49553	up
WBGene00011727	T12A7.6	203	191	171	1124	1176	909	4.15873	3.3432	2.96947	20.3022	20.0166	15.7231	1.95274e-40	2.11596	up
WBGene00004249	pvf-1	466	421	472	1662	1796	1560	11.89	9.42477	10.0365	37.0765	37.6312	33.3134	1.61983e-40	1.52046	up
WBGene00000176	aqp-8	893	973	1080	2553	2722	2836	22.691	22.2457	24.0688	56.2725	56.7687	59.0338	1.39239e-40	1.11135	up
WBGene00004727	sax-1	1088	1117	1111	2993	3448	3053	17.0504	15.3378	14.5021	40.98	44.34	39.9952	1.20345e-40	1.16023	up
WBGene00050904	Y70C5A.3	359	491	575	2050	1919	1713	4.54496	5.44765	6.07406	22.6855	19.9475	18.1415	1.13248e-40	1.64544	up
WBGene00017045	atg-13	793	746	1060	3142	2968	2733	14.6786	12.0992	16.347	50.8338	45.1189	42.3272	1.04354e-40	1.41567	up
WBGene00017356	F10E9.4	1757	1720	1782	894	950	844	52.4336	44.9867	44.2945	23.2693	23.2355	21.0375	7.37755e-41	-1.31297	down
WBGene00012531	Y32F6B.1	1605	1663	1962	5768	5438	4459	17.1103	15.5367	17.4131	53.6546	47.5127	39.6951	5.82007e-41	1.23199	up
WBGene00011830	cyp-29A2	707	729	818	2191	2375	2119	11.3884	10.2906	10.9788	30.8155	31.3831	28.5305	5.12889e-41	1.21515	up
WBGene00020498	T14B4.1	2462	2779	2802	1436	1757	1540	18.1596	17.9655	17.2135	9.24471	10.6247	9.48819	4.69023e-41	-1.10903	down
WBGene00012984	Y48B6A.13	973	1101	1233	459	499	385	21.828	21.6554	23.0296	8.98831	9.16632	7.20369	4.23457e-41	-1.62954	down
WBGene00003066	lpl-1	2342	2740	2951	1712	1663	1683	69.9083	71.6749	73.3685	44.5778	40.6869	41.9584	4.1073e-41	-1.00668	down
WBGene00018682	aagr-4	3296	3672	4575	2092	2402	1920	32.2103	31.4432	37.2346	17.8386	19.2378	15.6701	3.74915e-41	-1.18322	down
WBGene00000702	col-128	1385	1829	2113	783	739	590	27.8993	32.2905	35.4602	13.7625	12.1947	9.92119	3.64574e-41	-1.65485	down
WBGene00022852	ZK1127.5	1560	1677	1712	805	795	908	35.0629	33.0313	32.0544	15.7922	14.6504	17.0403	3.53835e-41	-1.32074	down
WBGene00019103	F59D6.1	59	71	58	501	556	619	3.05411	3.26685	2.52047	23.1658	24.1551	27.3956	3.1925e-41	2.73507	up
WBGene00012186	mlt-11	26969	36491	47151	9514	9357	10178	87.3295	103.077	124.851	27.1666	24.7096	27.8345	2.896e-41	-2.22059	down
WBGene00020846	T27A10.6	2151	2829	3692	1315	1249	1268	20.8089	24.1474	29.9788	11.1784	9.91141	10.2466	2.66545e-41	-1.49732	down
WBGene00018052	F35F10.1	373	417	336	1552	1545	1567	11.567	11.3137	8.674	42.0082	39.2783	40.5842	2.45339e-41	1.68121	up
WBGene00004224	ptr-10	1242	1518	2070	631	576	486	11.7132	12.7112	16.3787	5.25172	4.50091	3.88014	2.00067e-41	-1.82373	down
WBGene00022797	best-24	1092	1090	1122	2976	3128	3160	14.1815	12.4116	12.1411	33.7361	33.3106	34.2844	1.64773e-41	1.13181	up
WBGene00017060	D2063.1	45	47	49	448	549	454	1.15819	1.04011	1.04299	10.0637	11.5839	9.76791	1.43336e-41	2.92622	up
WBGene00019599	acds-10	924	976	1164	2781	3009	3297	8.45583	7.77523	8.78763	22.073	22.637	25.2222	1.33571e-41	1.21858	up
WBGene00015486	popl-1	1606	1687	2006	908	821	933	18.5432	17.0708	19.2975	9.14775	7.76621	8.99966	1.03405e-41	-1.32813	down
WBGene00000698	col-124	11	16	21	321	351	406	0.265219	0.334877	0.412504	7.58639	7.92356	8.38297	9.86814e-42	3.92402	up
WBGene00009028	F21H7.2	0	0	0	341	332	351	0	0	0	4.51266	4.13658	4.44726	9.13546e-42	6.8248	up
WBGene00019284	K01A2.10	303	392	401	1359	1481	1326	9.50557	10.7868	10.4875	37.375	38.3168	34.9197	7.92537e-42	1.57094	up
WBGene00022173	set-27	1599	1848	1918	989	1050	1016	19.5391	19.7841	19.5234	10.5462	10.5148	10.3673	6.62543e-42	-1.15266	down
WBGene00013156	Y53F4B.9	1486	1760	1769	914	839	858	11.2599	11.6856	11.1638	6.04221	5.2108	5.42612	6.58077e-42	-1.279	down
WBGene00013633	Y105C5A.8	152	124	84	1016	1071	952	4.98427	3.54318	2.27539	29.473	29.1483	26.3962	6.27943e-42	2.64552	up
WBGene00006700	uba-2	1507	1690	2014	702	859	881	16.7703	16.4818	18.6661	6.81595	7.8307	8.18296	5.84454e-42	-1.42627	down
WBGene00000656	col-80	1433	1353	1413	3771	4363	4481	38.3252	31.7143	31.4681	88.0226	95.6474	100.106	5.61683e-42	1.22729	up
WBGene00009515	clec-170	614	594	655	144	169	101	10.4331	8.8536	9.27716	2.12739	2.34297	1.42374	5.42581e-42	-2.47104	down
WBGene00015425	C04E6.11	2005	2072	2102	766	1089	921	17.4182	15.7717	15.2033	5.80227	7.75061	6.6795	4.41611e-42	-1.49677	down
WBGene00022178	cest-25	667	757	798	2253	2410	2083	10.7383	10.6903	10.7018	31.6943	31.8439	28.0362	3.5838e-42	1.24997	up
WBGene00016458	C35E7.6	614	716	642	2244	2351	2028	8.251	8.4366	7.18568	26.3545	25.9325	22.7953	3.56484e-42	1.38939	up
WBGene00007226	C01G6.4	599	701	732	1951	2109	2082	16.7675	17.2092	17.069	47.6954	48.4203	48.696	2.68879e-42	1.2447	up
WBGene00003517	nac-1	1038	931	1027	3005	3165	3431	14.9316	11.7349	12.2965	37.7183	37.3162	41.2227	2.669e-42	1.31991	up
WBGene00015759	C14C6.5	1230	1722	1519	654	664	615	60.3254	74.076	62.0482	27.9519	26.7066	25.1976	2.47561e-42	-1.54096	down
WBGene00019212	zmp-2	2046	2962	3430	1287	1170	1079	26.2389	32.9921	36.6965	14.3852	12.5126	12.0045	1.575e-42	-1.5731	down
WBGene00004919	snr-6	2022	2652	2366	980	1242	1170	136.384	156.728	132.921	57.6863	68.65	65.919	1.31594e-42	-1.39166	down
WBGene00001477	fmo-2	643	452	520	2533	2418	2758	10.6416	6.55622	7.16961	36.6259	32.8461	38.1703	1.211e-42	1.8728	up
WBGene00001439	fkh-7	2554	2876	3048	7957	8527	6610	26.1279	27.0228	28.1108	65.4461	72.6786	51.4994	1.00521e-42	1.09526	up
WBGene00012910	Y46G5A.20	24	40	65	549	972	583	1.17958	1.70093	2.66445	23.7405	39.5117	24.1362	9.71297e-43	3.54103	up
WBGene00020036	R12E2.11	3613	4235	4274	2123	2557	1885	89.1994	91.9957	88.3029	45.8076	51.8667	38.739	8.50136e-43	-1.22635	down
WBGene00010624	mrps-15	2172	2512	2907	1413	1575	1447	51.677	52.3685	57.5984	29.3292	30.7202	28.7448	7.03411e-43	-1.11279	down
WBGene00001303	sec-61.G	6727	8913	8136	3842	4754	4853	427.842	496.744	430.905	213.179	247.821	257.745	6.6972e-43	-1.16234	down
WBGene00017210	F07E5.5	4032	3987	4011	2333	2436	2504	89.2832	77.3678	73.9646	45.0801	44.2129	46.3045	6.07145e-43	-1.07476	down
WBGene00003622	nhr-23	3077	4088	4618	2057	1769	2067	46.444	53.5351	56.446	26.4851	22.5689	26.7192	5.55996e-43	-1.32642	down
WBGene00019154	glf-1	2177	3124	3787	1302	1241	1321	36.0262	45.315	52.2006	18.7939	16.8291	18.2508	5.38679e-43	-1.55152	down
WBGene00021638	Y47G6A.9	1365	1494	1515	754	715	705	48.4538	46.4678	44.7649	23.346	20.7963	20.8812	4.98018e-43	-1.34812	down
WBGene00010488	endu-1	494	601	660	2061	2151	1813	13.6855	14.5867	15.2261	49.8762	48.8928	41.9829	4.13664e-43	1.42813	up
WBGene00018602	F48D6.4	970	1185	1368	4415	4670	3385	50.4414	53.8784	59.2292	201.058	199.532	147.364	4.07821e-43	1.47325	up
WBGene00002016	hsp-16.2	386	411	325	45	54	34	18.0514	16.893	12.7023	1.78213	2.0342	1.28115	3.76261e-43	-3.31156	down
WBGene00007712	mrpl-34	1625	1577	1525	685	748	659	68.1047	57.9252	53.2314	25.0246	25.6792	23.0421	3.70611e-43	-1.52029	down
WBGene00008926	F17H10.2	420	582	530	2105	1805	2060	9.78097	13.9934	10.271	43.0784	34.5641	39.9277	3.4216e-43	1.60806	up
WBGene00000373	cyp-14A5	599	673	762	2080	2123	2374	9.40641	9.26381	9.97594	28.5389	27.369	31.1767	3.34757e-43	1.34251	up
WBGene00015350	fbxl-1	2878	2911	2962	8170	8400	7007	37.1627	34.4118	33.5081	97.2919	93.7881	79.4103	3.24811e-43	1.07434	up
WBGene00007808	best-7	284	266	292	1136	1251	1269	3.93123	3.22221	3.36561	13.7457	14.2161	14.6888	2.50338e-43	1.75042	up
WBGene00021535	wht-7	327	297	472	1640	1656	1657	4.39884	3.51031	5.30992	19.3664	18.305	18.6896	2.29406e-43	1.8175	up
WBGene00011561	ttr-15	2419	2970	2576	7142	9246	7535	109.115	117.422	96.7831	281.177	341.914	283.911	1.94668e-43	1.22942	up
WBGene00007867	C32H11.4	1572	1443	1593	675	612	698	37.1768	29.9031	31.3772	13.9271	11.8586	13.7869	1.39321e-43	-1.55425	down
WBGene00015868	C16H3.3	1150	1174	1404	3428	3337	3413	11.6407	10.4037	11.8249	30.2291	27.6538	28.8254	1.07519e-43	1.10046	up
WBGene00021425	ppgn-1	2438	2566	2573	1501	1441	1432	28.5254	26.3134	25.0714	15.3218	13.8162	13.9884	1.00651e-43	-1.1375	down
WBGene00011801	T16G1.7	114	218	255	3603	4080	3025	2.10638	3.54193	3.92309	58.2916	61.9982	46.8392	9.13073e-44	3.69277	up
WBGene00006567	tgt-2	1905	2008	2150	1084	1219	1136	43.562	40.2479	40.9497	21.63	22.8417	21.6849	8.93021e-44	-1.16149	down
WBGene00004994	spp-9	637	958	802	175	235	214	51.4447	67.7729	53.9245	12.3194	15.508	14.378	8.07015e-44	-2.24926	down
WBGene00010593	gsnl-1	1566	1782	2131	5075	5130	4551	27.3591	27.2971	31.0218	77.3988	73.4924	66.4343	8.0674e-44	1.08456	up
WBGene00006948	wrt-2	2318	2996	3550	1535	1377	1409	39.3671	44.5969	50.226	22.7525	19.1639	19.9908	7.19363e-44	-1.36297	down
WBGene00000102	akt-1	2759	2873	2861	8267	8677	6923	36.8989	33.2126	31.3623	95.2195	95.2078	76.3343	6.8982e-44	1.13464	up
WBGene00010123	F55G11.2	838	722	909	201	267	245	21.601	16.3046	19.5099	4.5063	5.63685	5.27349	6.19191e-44	-2.11394	down
WBGene00004448	rpl-34	26472	33703	30219	16636	19629	20403	1785.85	1992.44	1697.75	979.283	1085.36	1149.49	5.49334e-44	-1.01765	down
WBGene00012423	Y10G11A.1	2215	2610	2517	1454	1456	1389	50.8778	52.5338	48.1645	29.1567	27.4075	26.6573	5.23545e-44	-1.1145	down
WBGene00012550	spcs-2	3048	3162	3786	2052	2097	2126	112.533	103.061	117.269	65.9434	63.8943	65.5967	5.09289e-44	-1.01255	down
WBGene00015160	B0361.6	2074	1857	1973	930	840	860	43.0341	33.7784	34.0987	16.8379	14.2872	14.9081	3.46867e-44	-1.50981	down
WBGene00013541	lonp-2	281	373	270	1412	1556	1472	3.30369	3.83304	2.64181	14.4848	14.9889	14.4442	3.45314e-44	1.89199	up
WBGene00021482	Y39H10A.6	1211	1489	1507	3557	3767	3613	13.4877	14.4322	13.8693	35.1118	35.049	34.907	2.9609e-44	1.03104	up
WBGene00007297	C04F12.1	297	363	339	1326	1446	1272	2.67543	2.86311	2.54108	10.4351	10.6936	9.58614	2.57757e-44	1.65604	up
WBGene00021830	Y54E10A.10	2596	2675	2883	966	1302	1378	71.944	64.3735	66.3557	23.3336	29.5678	31.7817	1.79333e-44	-1.50097	down
WBGene00019219	H20J04.4	1568	1532	1836	831	817	790	21.3139	18.2361	20.7554	9.8497	9.12034	8.97616	1.65475e-44	-1.35626	down
WBGene00008447	E01G4.5	177	131	223	1044	1211	1077	3.58385	2.33712	3.77583	18.537	20.1977	18.3049	1.08456e-44	2.26691	up
WBGene00019275	rpac-40	2127	2144	2250	988	1009	1190	47.5172	41.9704	41.862	19.2575	18.4742	22.1905	1.08151e-44	-1.37468	down
WBGene00015552	C06G3.6	552	640	748	2122	2228	1991	8.15257	8.28052	9.2043	27.3625	26.9952	24.5796	1.04712e-44	1.35927	up
WBGene00017991	clec-180	2133	2791	3521	1278	1290	1180	21.1568	24.6611	29.8708	10.9852	10.3735	9.79929	5.85786e-45	-1.49437	down
WBGene00003604	nhr-5	341	394	412	1334	1567	1513	4.56715	4.62491	4.59651	15.4606	17.0827	16.8091	5.35644e-45	1.58602	up
Caenorhabditis_elegans_newGene_624	-	155	180	187	1044	941	869	2.82291	2.88151	2.83887	16.6416	14.0854	13.2489	5.07384e-45	2.07905	up
WBGene00008610	F09C3.2	1490	1582	1659	4300	4730	3949	41.3702	38.4744	38.3535	104.175	107.643	91.5653	4.68702e-45	1.103	up
WBGene00010135	F55H12.4	690	885	790	2415	2845	2557	26.1443	29.3977	24.9215	79.9061	88.4125	80.963	4.68102e-45	1.36954	up
WBGene00010044	F54C9.9	2302	2737	2667	1540	1528	1467	27.2352	28.3787	26.2722	15.8951	14.813	14.4898	3.62159e-45	-1.10661	down
WBGene00015525	rha-2	2777	2886	2936	1634	1758	1748	21.1895	19.2978	18.6543	10.881	10.9935	11.1372	3.59401e-45	-1.08883	down
WBGene00007112	B0035.13	2981	3066	3473	1951	2036	1790	81.1699	73.5869	78.8648	47.7105	45.4395	41.8846	3.51823e-45	-1.06396	down
WBGene00020550	T17H7.1	2236	3265	3970	1309	1047	1058	28.3272	35.9845	41.8377	14.3413	10.7734	11.1053	3.32145e-45	-1.78205	down
WBGene00020706	atg-9	1270	1698	1707	4255	4381	4220	11.9349	13.9907	13.3721	34.9023	34.2502	33.4308	3.21958e-45	1.11442	up
WBGene00016073	C24H12.4	5354	5779	5820	3635	3861	3236	74.1943	70.146	67.1402	43.9483	43.8448	37.4465	3.05944e-45	-1.00615	down
WBGene00022401	Y97E10AR.6	1585	1494	1874	4936	5254	4407	32.5278	26.8677	32.027	88.4134	88.3854	75.5402	2.74258e-45	1.2069	up
WBGene00008583	ugt-65	678	770	1115	145	209	213	12.0216	11.9732	16.4776	2.22629	3.02734	3.13446	1.38987e-45	-2.46516	down
WBGene00014173	ZK970.7	6	5	18	320	419	473	0.25519	0.202068	0.709221	13.6615	16.7941	19.3076	1.34182e-45	4.67654	up
WBGene00045305	ZC250.4	539	929	966	153	103	73	19.0094	28.6968	28.3538	4.69906	2.96487	2.13472	1.10956e-45	-3.11776	down
WBGene00021844	sec-11	2963	3545	3758	1761	2118	2079	114.2	119.732	120.643	59.2266	66.8942	66.9111	1.09925e-45	-1.12473	down
WBGene00022029	Y65B4A.6	3455	3852	4250	2011	2429	2418	34.1604	35.2676	34.9814	18.2079	20.0632	19.9815	8.98086e-46	-1.09441	down
WBGene00016269	C30G4.4	641	705	762	2146	2570	2181	16.5642	16.2026	16.3885	54.329	60.828	52.4173	7.70675e-46	1.35547	up
WBGene00019760	calu-1	8388	10570	12759	5672	6391	6413	190.461	210.419	241.702	112.896	119.127	121.836	6.07617e-46	-1.11173	down
WBGene00017374	ttr-41	1359	1644	1575	3887	4637	4265	75.9928	80.5686	73.3394	189.666	212.537	199.165	5.85852e-46	1.13046	up
WBGene00014030	glb-1	1454	1562	1542	3884	4624	4269	67.5596	63.5902	59.6824	157.507	176.147	165.678	5.14745e-46	1.13193	up
WBGene00008964	mltn-9	1046	1302	1678	458	506	401	10.4483	11.394	13.9536	3.98484	4.14105	3.34272	4.15638e-46	-1.87563	down
WBGene00007365	C06B3.6	531	543	485	6578	6576	4282	15.248	13.8089	11.8017	179.843	172.654	115.391	3.25071e-46	3.03975	up
WBGene00017464	sulp-2	373	375	421	1430	1560	1446	4.73457	4.18073	4.45736	15.8769	16.2699	15.3641	2.90746e-46	1.56463	up
WBGene00011032	ddx-52	2244	2386	2742	1455	1372	1379	32.5686	30.3472	32.8951	18.2831	16.3189	16.56	2.82076e-46	-1.14909	down
WBGene00003609	nhr-10	1279	1159	1622	4137	4503	4211	23.0636	18.3075	24.3581	65.1089	66.5614	63.4218	2.66253e-46	1.31114	up
WBGene00000733	col-160	6316	7646	6394	17319	18256	18648	158.978	168.675	134.05	385.822	382.258	397.749	2.57554e-46	1.05911	up
WBGene00017781	F25E2.3	229	255	312	1216	1315	1121	5.63437	5.50464	6.38866	26.1569	26.578	23.0702	2.35536e-46	1.837	up
WBGene00011060	R06C1.6	1181	1196	1289	3311	3553	3270	20.4206	18.1265	18.5639	49.9628	50.3558	47.2257	1.58488e-46	1.11371	up
WBGene00003955	pcn-1	3462	4090	4443	2126	2381	2554	97.0731	100.52	103.759	52.023	54.7337	59.8202	1.05785e-46	-1.10339	down
WBGene00020142	aak-2	2947	2756	3087	7457	7700	7412	34.6397	28.6285	30.0789	76.091	73.5811	72.5608	9.92419e-47	1.00643	up
WBGene00002229	klp-19	2428	2859	3311	1636	1693	1656	18.7591	19.3594	21.3021	11.0262	10.7218	10.6815	8.82759e-47	-1.12263	down
WBGene00013892	ZC434.4	1506	1512	1730	765	782	794	44.7467	39.363	42.8079	19.8217	19.0511	19.7104	8.38635e-47	-1.35988	down
WBGene00021888	manf-1	2886	3649	3564	1492	1967	1553	113.604	125.875	116.823	51.242	63.4409	51.0535	7.95748e-47	-1.34967	down
WBGene00017342	F10D7.5	830	850	1014	2695	2789	2586	9.71044	8.71505	9.88628	27.7159	27.0063	25.2921	3.45678e-47	1.23231	up
WBGene00020561	T19C3.3	2257	2715	2881	1445	1616	1517	147.566	155.573	156.909	82.4574	86.5809	82.8248	2.64645e-47	-1.11788	down
WBGene00021709	ugt-29	65	100	88	783	679	670	0.885038	1.28357	0.951933	9.71026	8.50373	8.10629	2.59136e-47	2.67712	up
WBGene00017855	F27C1.6	4608	4537	5122	2907	3228	2866	59.5366	51.3566	55.1051	32.799	34.1947	30.9488	2.42521e-47	-1.01103	down
WBGene00007900	C33D9.6	993	1000	1283	3654	3490	3217	8.93369	7.90883	9.61981	28.6883	25.769	24.1666	1.72797e-47	1.31218	up
WBGene00007017	mdt-17	2937	2830	3401	1748	1794	1747	34.763	29.3227	33.5335	18.1581	17.3783	17.2608	1.66834e-47	-1.13652	down
WBGene00008415	mce-1	1600	1806	2023	5626	5208	4690	53.7657	53.1733	56.6102	164.975	143.458	131.641	1.04759e-47	1.16864	up
WBGene00018393	msra-1	1151	985	1236	3799	3656	3674	45.2908	34.2969	40.9091	130.38	118.099	121.408	4.92459e-48	1.36576	up
WBGene00017195	glo-4	1798	1747	1839	4785	5455	4897	10.8726	9.26191	9.26577	25.2599	27.0476	24.7436	3.74142e-48	1.13473	up
WBGene00010422	H32K16.2	95	178	116	965	1047	1088	6.02044	9.95567	6.17152	53.8884	54.9416	58.1779	3.70712e-48	2.59953	up
WBGene00007175	B0395.3	1139	1404	1210	3862	3835	3777	15.4895	16.6541	13.688	45.5337	42.5496	42.7572	3.62854e-48	1.25832	up
WBGene00001699	grd-10	1667	1766	1745	4626	4831	5333	82.4159	76.5131	71.8434	199.599	195.831	220.237	3.33913e-48	1.15989	up
WBGene00000970	dhs-6	1391	1528	1783	4103	4199	4011	26.5723	25.5924	28.3689	68.4284	65.7874	64.0212	3.14162e-48	1.04259	up
WBGene00009653	F43D9.1	2037	2232	2612	1229	1133	1238	14.2464	13.679	15.2171	7.49937	6.49371	7.23127	3.06375e-48	-1.27053	down
WBGene00016093	srsx-34	398	339	471	1681	1841	1678	5.94781	4.46605	5.79286	21.4808	22.1488	20.8718	2.72302e-48	1.74348	up
WBGene00019113	F59E11.7	85	99	110	772	1152	739	2.59252	2.31081	2.70688	18.1345	25.408	16.5984	1.98824e-48	2.76921	up
WBGene00018960	ilcr-2	3440	3630	3692	2165	2183	2269	38.7029	35.7932	34.5989	21.25	20.1282	21.3215	1.64492e-48	-1.0476	down
WBGene00020139	eppl-1	5696	6111	6145	3047	3918	3470	104.918	98.6502	94.4092	49.0772	59.2891	53.3644	1.61191e-48	-1.13007	down
WBGene00003155	mcm-3	2363	2506	2790	1410	1507	1539	24.4607	22.7253	24.046	12.7296	12.7817	13.2976	9.2842e-49	-1.12357	down
WBGene00004496	rps-27	15725	20659	18181	8551	10561	10897	1237.92	1425.41	1191.82	587.271	681.526	720.191	8.66523e-49	-1.20466	down
WBGene00006760	unc-23	5967	5591	6852	3572	3986	3634	88.285	72.653	83.8514	46.8403	48.0954	45.8413	7.84641e-49	-1.0632	down
WBGene00019836	R02F2.7	2238	2132	2245	1087	1079	959	28.0068	23.3664	23.4138	11.859	11.0638	10.0197	6.07504e-49	-1.42627	down
WBGene00010835	M03B6.3	1411	1954	2465	624	594	709	19.2792	23.3885	28.0519	7.43353	6.64645	8.08098	5.69313e-49	-1.90692	down
WBGene00008963	F19H8.2	3762	4154	5100	2456	2598	2664	98.8061	95.6179	111.566	56.286	55.93	58.4482	4.58172e-49	-1.09106	down
WBGene00006724	ubh-4	2499	2906	3046	1412	1459	1667	64.016	65.2318	64.981	31.5551	30.6194	35.645	3.39786e-49	-1.23586	down
Caenorhabditis_elegans_newGene_1587	-	653	757	742	2281	2500	2212	3.8218	3.87438	3.61144	11.6298	12.0111	10.8314	2.70983e-49	1.346	up
WBGene00017830	rpb-8	2256	2453	2262	965	1146	1153	88.0498	83.8867	73.5149	32.867	36.6551	37.5747	2.39175e-49	-1.43916	down
WBGene00007623	C16C10.2	1803	1825	2039	908	926	759	53.9175	47.844	50.7881	23.7034	22.7007	18.9486	2.23872e-49	-1.46729	down
WBGene00019963	R08E5.3	354	525	532	1938	2229	2633	4.13549	5.36749	5.17657	19.7609	21.3479	25.6968	2.01415e-49	1.91173	up
WBGene00013284	daf-22	1616	1893	2088	4702	4826	5111	33.5767	34.4717	36.1345	85.2933	82.2215	88.7271	2.01222e-49	1.04171	up
WBGene00010277	F58G6.7	2256	2090	2509	1129	1070	1132	75.7124	61.4737	70.1298	33.0613	29.413	31.7218	8.63565e-50	-1.38202	down
WBGene00003091	lys-2	3350	3509	3668	2181	2244	2097	100.31	92.0758	91.4905	56.9891	55.0718	52.4441	7.61495e-50	-1.03651	down
WBGene00006916	vha-7	982	972	1020	2937	3089	2985	7.1794	6.889	6.15374	20.8238	20.5641	20.6289	7.26136e-50	1.24349	up
WBGene00021158	Y4C6B.4	213	187	173	1137	1318	1099	3.37089	2.52898	2.19451	15.2206	16.5965	14.5557	6.62515e-50	2.24253	up
WBGene00000103	akt-2	1372	1499	1514	4450	4468	3866	19.0083	18.2142	17.483	53.6368	50.4311	44.436	6.56332e-50	1.19094	up
WBGene00022591	cuti-1	1220	1368	1797	572	529	481	47.5924	46.7969	58.409	19.4688	16.9261	15.6606	6.03967e-50	-1.79173	down
WBGene00020389	T10B5.3	3675	4380	4250	2556	2457	2561	85.2764	89.193	82.2602	51.8322	46.662	49.5535	5.40274e-50	-1.04247	down
WBGene00019332	K02F3.9	645	849	789	2608	2500	2671	30.4016	35.1041	30.9835	107.36	96.6875	105.226	4.83596e-50	1.41771	up
WBGene00006431	tag-52	455	707	625	2619	2911	2306	5.7096	7.78113	6.54148	28.7191	29.9859	24.2092	3.91501e-50	1.77617	up
WBGene00016142	mrps-18C	3850	4196	4545	2750	2554	2633	78.3889	74.8596	77.0686	48.8452	42.6177	44.7734	3.50705e-50	-1.00785	down
WBGene00015282	C01B10.8	3672	3650	4025	2248	2402	2154	48.0453	41.9675	43.807	25.6084	25.7379	23.5009	2.69482e-50	-1.08396	down
WBGene00017071	aagr-1	1540	1571	2023	4885	4840	5065	15.0553	13.1103	16.4883	41.5977	37.524	39.9507	2.15152e-50	1.18024	up
WBGene00015947	C18A11.1	73	90	109	697	788	681	2.58254	2.79669	3.21016	21.6481	23.0036	20.2591	1.83714e-50	2.60304	up
WBGene00001476	fmo-1	736	774	1141	3432	3901	3245	11.5468	10.8988	15.4957	47.6931	51.8101	43.2658	1.645e-50	1.64688	up
WBGene00021167	cyp-32B1	45	101	42	911	882	912	0.781027	1.5422	0.602956	13.9211	12.6577	13.3349	1.38558e-50	3.38806	up
WBGene00021253	Y22D7AL.15	384	450	415	1784	1862	1562	19.7934	20.3328	17.8163	80.236	78.7003	67.2268	1.38118e-50	1.69809	up
WBGene00009057	cept-1	1920	2258	2415	1029	1129	1207	36.0736	37.1715	37.7861	16.8634	17.3819	18.9395	1.30249e-50	-1.30779	down
WBGene00015067	cest-35.1	197	298	252	1355	1347	1245	3.03694	4.01938	3.22963	18.2287	17.0233	16.0272	1.13055e-50	2.03613	up
WBGene00013654	Y105C5B.15	694	793	776	229	230	227	14.7107	14.8228	13.6798	4.23105	4.00567	3.99957	1.06688e-50	-2.04585	down
WBGene00019272	H42K12.3	3266	4605	5184	2074	2089	1869	53.8181	66.4374	71.1179	29.8296	28.2116	25.6884	9.2645e-51	-1.43978	down
WBGene00004917	snr-4	3223	3514	3836	2073	2031	2235	132.229	126.623	135.387	75.1188	72.9454	76.7198	7.63626e-51	-1.07957	down
WBGene00016004	C18H9.6	877	962	1026	350	352	307	31.3116	30.0962	30.5108	10.8904	10.3027	9.13171	5.89288e-51	-1.83508	down
WBGene00003815	nars-1	6581	7920	8442	4764	4554	5143	101.443	106.992	108.378	64.0797	57.5362	66.2023	5.46349e-51	-1.00451	down
WBGene00018762	F53E10.6	1933	2170	2009	573	776	840	80.3069	78.9884	69.5101	20.77	26.4025	29.1344	4.90258e-51	-1.81719	down
WBGene00302993	T14B4.19	687	899	1018	257	236	250	42.011	48.2138	51.8717	13.7291	11.8367	12.7543	4.50781e-51	-2.11963	down
WBGene00007666	C18B12.4	935	1201	1200	3251	3587	3226	14.9113	16.7915	15.9543	45.2783	46.9313	43.011	4.3084e-51	1.24454	up
WBGene00004987	spp-2	864	971	916	2921	3202	2768	48.7809	48.0398	43.0795	143.985	148.24	130.569	3.68448e-51	1.33613	up
WBGene00006603	tps-2	3601	3953	4515	10901	11120	9387	27.0142	25.1413	27.2393	69.9776	67.6013	57.4902	3.25985e-51	1.03302	up
WBGene00001983	hoe-1	2938	2863	2960	1442	1585	1574	30.3608	25.9241	25.4777	12.9931	13.3942	13.5817	2.48643e-51	-1.27637	down
WBGene00017816	hrpk-1	4521	5163	5728	3079	3070	3405	71.4336	71.9256	75.9242	43.7899	41.4046	45.9997	1.55384e-51	-1.02945	down
WBGene00012834	Y43F8C.13	2555	2907	3152	1599	1564	1717	63.3338	63.1445	65.0733	34.5758	31.7771	35.5386	1.38104e-51	-1.1591	down
WBGene00009626	F42A8.1	477	656	705	2394	2425	2186	10.2008	12.291	12.5462	44.696	42.5171	39.0535	1.1733e-51	1.58158	up
WBGene00010638	K07F5.14	1558	2056	1964	850	854	860	31.9168	36.9201	33.5162	15.1914	14.3421	14.7173	7.25216e-52	-1.45568	down
WBGene00022396	Y97E10AR.1	647	628	713	2764	2442	2324	7.36748	6.25648	6.76744	27.5232	22.8267	22.1214	6.82067e-52	1.56397	up
WBGene00022738	fubl-2	6013	7332	7461	4040	4435	4673	90.105	96.2486	93.1467	52.695	54.3733	58.3471	5.51488e-52	-1.00332	down
WBGene00007215	oxa-1	2658	3225	3225	1778	1683	1628	46.2889	49.2158	46.7638	27.0057	24.0152	23.6757	4.47585e-52	-1.1792	down
WBGene00007355	rpb-6	2452	3081	2870	1378	1426	1534	115.473	127.166	112.593	56.6059	55.0261	60.3522	3.68324e-52	-1.29347	down
WBGene00006613	trm-1	2078	2222	2502	1240	1269	1257	31.4214	29.4365	31.5009	16.3612	15.7278	15.8742	3.00155e-52	-1.19364	down
WBGene00004450	rpl-36	35341	44362	39763	19969	22942	25319	2807.83	3089.64	2630.61	1382.61	1494.79	1679.94	2.92762e-52	-1.15158	down
WBGene00021818	Y53G8B.2	74	132	155	999	1002	970	1.7301	2.71578	3.04624	20.6174	19.4184	19.1475	1.9222e-52	2.66016	up
WBGene00014120	ZK858.7	1946	2354	2354	1055	1187	1184	37.6622	39.911	37.9419	17.8093	18.8194	19.1268	1.80669e-52	-1.29713	down
WBGene00008354	gcsh-1	1451	1591	1799	616	782	655	79.8362	76.7296	82.4578	29.5426	35.2515	30.0961	1.71237e-52	-1.57336	down
WBGene00020649	sma-10	1496	1484	1700	4218	4363	4204	14.8692	12.976	14.1257	36.9555	35.6814	35.0633	1.60253e-52	1.09889	up
WBGene00009835	F47H4.2	507	570	749	3000	3507	2374	4.34291	4.28493	5.34746	22.4633	24.666	17.0848	1.3938e-52	1.92333	up
WBGene00007696	tram-1	6098	6646	8137	4335	3936	3900	109.575	104.957	122.486	68.2592	58.3699	58.9595	1.1152e-52	-1.11519	down
WBGene00012665	pph-5	3505	3696	4119	2293	2168	2324	59.3003	54.6611	57.5808	33.581	29.8245	32.572	1.05525e-52	-1.08049	down
WBGene00001864	him-5	34	22	35	497	509	526	0.908318	0.518817	0.749977	11.6802	11.2298	11.8437	8.3732e-53	3.59462	up
WBGene00009380	F34H10.3	595	607	727	2650	2465	2200	12.1314	10.8846	12.3535	47.3213	41.3119	37.6297	6.4023e-53	1.56877	up
WBGene00021816	Y53G8AR.9	3204	3581	4026	2210	2325	2249	44.6028	43.6969	46.6811	26.8515	26.5335	26.1439	5.82758e-53	-1.0133	down
WBGene00004444	rpl-30	26983	35074	31914	15777	19146	19414	1858.74	2117.57	1833.41	946.826	1077.59	1116.15	5.60819e-53	-1.13268	down
WBGene00016837	syf-1	3942	4136	4661	2655	2506	2647	41.594	38.2426	40.9528	24.4377	21.6684	23.3256	5.34514e-53	-1.04837	down
WBGene00012085	T27D12.1	1243	1430	1931	4991	5238	5602	19.7778	19.6456	25.3808	68.564	67.3674	73.5812	4.83923e-53	1.43852	up
WBGene00004264	qua-1	5664	7974	9662	3617	3467	3330	40.8852	50.4464	58.0858	22.782	20.5105	20.0768	4.42999e-53	-1.48375	down
WBGene00013111	sta-1	1916	2196	2538	6405	6667	5662	22.9308	23.0143	25.2679	66.9314	65.3196	56.6086	4.38502e-53	1.14833	up
WBGene00011730	drr-2	7081	8152	8546	4480	5317	5286	196.613	198.338	197.611	108.534	121.006	122.56	3.90652e-53	-1.00008	down
WBGene00004981	spl-1	5283	5076	5924	2990	2974	3318	82.255	69.263	76.8075	40.626	37.9552	43.1359	2.21675e-53	-1.15479	down
WBGene00004825	skr-19	712	749	1026	3011	2995	2971	18.5079	17.0523	22.2079	68.299	63.8067	64.5035	2.15925e-53	1.50431	up
WBGene00010701	ent-2	3445	3661	3668	2097	2207	2137	53.246	49.5938	47.2174	28.277	27.9542	27.5768	1.72801e-53	-1.08878	down
WBGene00010872	M05B5.4	639	522	696	3036	2550	2721	12.5137	8.95863	11.3457	51.8749	40.9373	44.5053	1.64801e-53	1.7985	up
WBGene00008677	F11A5.9	788	663	802	2736	3599	3225	11.6874	8.60939	9.91004	35.4252	43.7717	39.9568	1.55602e-53	1.7176	up
WBGene00019713	pqn-52	1457	1817	1850	4471	5183	4768	28.4679	31.7831	30.9677	76.8509	80.6112	72.4703	1.50701e-53	1.14509	up
WBGene00021546	laat-1	2749	3285	3449	1785	1648	1509	51.1226	53.5247	53.4135	28.9491	25.108	23.4235	1.28344e-53	-1.27743	down
WBGene00000966	dhs-2	178	227	226	1072	1290	1104	4.20416	4.68532	4.38473	22.0863	24.3208	21.5043	5.61324e-54	2.08918	up
WBGene00009189	F27D4.4	4570	5224	6086	3276	3020	3076	93.4288	93.5966	103.405	58.4171	50.3761	52.3373	5.59229e-54	-1.09757	down
WBGene00044083	tin-9.2	1868	1896	1939	873	758	821	78.4711	70.6645	67.9611	32.1418	25.8527	28.8553	3.72519e-54	-1.5576	down
WBGene00044321	mrps-30	5675	5349	5926	2952	3321	3335	93.0264	76.9602	81.0205	42.2065	44.7133	45.7344	3.4819e-54	-1.16696	down
WBGene00002393	lpr-1	802	759	938	212	256	217	19.1278	16.6585	20.3754	4.77973	5.55409	4.60548	3.44924e-54	-2.18854	down
WBGene00018744	F53B3.6	5104	5356	6378	3157	3177	3552	100.103	92.064	104.185	54.0205	51.0695	58.1793	3.27468e-54	-1.10819	down
WBGene00022382	Y94H6A.10	5985	6029	6845	1226	1407	898	116.078	102.468	110.557	20.7376	22.3533	14.5362	3.26168e-54	-2.71491	down
WBGene00020917	W01B11.6	333	476	408	1723	2014	1809	20.9067	26.2294	21.3597	94.5118	103.804	94.9899	2.74615e-54	1.82765	up
WBGene00001480	fmo-5	373	403	355	1683	1735	1619	5.972	5.64797	4.72239	23.3749	24.8912	21.5433	1.97017e-54	1.78843	up
WBGene00011692	T10G3.1	229	260	306	2062	2315	1356	4.69143	4.66658	5.21852	36.9569	38.9735	23.2501	1.80578e-54	2.46798	up
WBGene00011018	R05A10.1	1586	1512	1703	5400	5689	4608	42.2896	35.3276	37.8151	125.674	124.375	102.644	1.51853e-54	1.35237	up
WBGene00020208	fnip-2	1446	1710	1801	4435	4631	4252	12.9047	13.4079	13.4506	34.5894	33.9722	31.7754	1.39037e-54	1.0787	up
WBGene00003778	nnt-1	181	169	333	5561	6030	5350	1.5603	1.273	2.38779	41.8339	42.6097	38.5172	1.34521e-54	4.1138	up
WBGene00001391	far-7	432	583	500	1957	2247	2068	22.1875	26.2569	21.401	87.9098	94.5036	88.8085	1.24504e-54	1.69089	up
WBGene00015117	B0294.1	2978	3629	3445	1640	1840	1895	132.002	140.95	127.17	63.4139	66.8543	70.1263	1.05484e-54	-1.24488	down
WBGene00008224	slrp-1	982	979	1123	3180	3295	3024	40.295	35.1933	38.3696	113.907	110.873	103.666	8.10017e-55	1.2705	up
WBGene00004020	pho-1	5806	6793	7310	3921	4195	4486	105.669	108.71	111.134	62.3273	62.2061	67.7226	6.08325e-55	-1.0005	down
WBGene00010681	mak-1	4989	5585	6034	15548	17088	13323	79.1191	78.2327	79.931	213.648	219.417	175.79	4.57389e-55	1.11899	up
WBGene00004025	phy-2	2586	3279	4033	1425	1498	1533	41.4133	46.021	53.7974	19.9156	19.6651	20.5062	3.64525e-55	-1.4783	down
WBGene00019323	teg-4	5445	5560	6503	3586	3627	3820	38.1477	34.1355	37.9399	21.9195	20.8291	22.3518	2.23913e-55	-1.00906	down
WBGene00011449	T04H1.2	1965	2029	2350	5386	5936	5401	24.8906	23.1712	25.4355	59.9401	63.0911	56.308	2.18164e-55	1.04919	up
WBGene00015403	clec-10	3447	3624	3878	1950	2277	1941	69.4339	62.6802	63.8791	34.2505	37.5142	32.6479	2.03751e-55	-1.1731	down
WBGene00020366	acdh-10	2659	2900	3257	7086	8199	7241	53.0037	50.8234	54.2595	123.31	134.351	120.748	1.96156e-55	1.00511	up
WBGene00044488	Y54G2A.45	1534	1733	1627	648	744	698	39.7535	39.3783	35.1004	14.6313	15.781	15.0808	1.64969e-55	-1.56828	down
WBGene00009660	F43G6.8	237	311	313	1282	1429	1454	6.88195	7.90386	7.55043	32.473	33.9961	35.2532	1.52896e-55	1.91418	up
WBGene00000541	cln-3.3	888	794	663	140	143	127	17.3877	13.9187	10.7548	2.36139	2.21365	1.99958	1.42107e-55	-2.82262	down
WBGene00015509	C06A6.4	2090	2054	2874	7759	7431	7293	43.2859	37.2112	49.5266	140.162	126.17	126.04	1.32181e-55	1.33407	up
WBGene00004219	ptr-4	5146	6563	8360	3177	2821	2667	45.7692	51.151	61.9212	24.6513	20.5617	19.8049	1.26924e-55	-1.53453	down
WBGene00012909	spds-1	2837	2897	3327	1368	1554	1659	71.8871	64.0292	70.4057	29.6046	31.5827	34.6965	1.18687e-55	-1.32523	down
WBGene00006367	sym-2	4388	4983	5669	2879	3310	3060	54.9095	54.6309	59.0624	31.6175	34.0967	32.0073	1.1759e-55	-1.04204	down
WBGene00020889	T28C12.2	1097	1157	1158	333	212	254	19.5542	18.078	17.2004	5.18226	3.09148	3.77221	9.92358e-56	-2.40589	down
WBGene00015369	ugt-51	186	249	236	1482	1326	1170	3.08134	3.6231	3.25942	21.4926	18.0662	16.2351	7.72373e-56	2.19916	up
WBGene00011870	T20G5.8	850	1075	1150	242	315	206	49.7033	55.0838	56.0361	12.3333	15.0817	10.0511	5.79043e-56	-2.32267	down
WBGene00001692	grd-3	864	915	824	2921	3414	3347	34.7154	32.2497	27.5741	102.494	112.545	112.426	4.74453e-56	1.5325	up
WBGene00019520	K08B12.1	1572	1950	2529	665	769	604	34.5672	37.5733	46.3077	12.7485	13.8426	11.0868	4.40915e-56	-1.88868	down
WBGene00045433	F49D11.10	1704	1823	1984	893	811	846	19.7927	18.56	19.1973	9.05371	7.71788	8.20912	4.31808e-56	-1.44977	down
WBGene00001001	dis-3	4406	4387	4827	2586	2820	2779	40.1335	34.9927	36.5871	20.536	21.0276	21.0634	2.65042e-56	-1.08113	down
WBGene00004169	pqn-89	1453	1670	1822	4665	5021	4334	23.4564	23.4412	24.3591	65.2025	65.9145	57.9846	2.24093e-56	1.15544	up
WBGene00012007	T25B9.1	2043	2169	2364	1144	1120	1151	44.4158	41.3321	42.8107	21.6949	19.9607	20.8947	2.23622e-56	-1.28638	down
WBGene00013077	ttr-24	1883	2263	2327	5466	5763	5407	91.5888	96.6472	94.2658	229.87	228.121	217.898	1.86143e-56	1.01508	up
WBGene00021011	W03G1.5	49	35	49	561	692	604	0.87629	0.551902	0.73674	8.87423	10.2842	9.15133	1.26787e-56	3.35523	up
WBGene00010621	egg-6	1266	1711	1961	603	561	552	10.3934	12.3121	13.4161	4.32092	3.77764	3.78459	1.12437e-56	-1.84414	down
WBGene00008688	rbm-34	2894	3283	3423	1914	1934	1909	62.8243	62.4602	61.8929	36.2618	34.4065	34.6113	9.82838e-57	-1.08012	down
WBGene00017220	F07F6.8	665	781	762	3444	3195	2597	17.2812	17.8101	16.4958	78.2103	68.1366	56.4445	8.60637e-57	1.70661	up
WBGene00011344	T01G9.2	720	818	775	2646	2960	2542	12.8954	12.8704	11.5875	41.4479	43.559	38.1145	7.47352e-57	1.45973	up
WBGene00000233	avr-15	1271	1313	1463	3991	4299	3739	18.2745	16.0661	17.1164	49.2604	48.6597	43.4298	5.04187e-57	1.21972	up
WBGene00016417	C34F11.8	304	403	374	1533	1770	1866	8.89022	10.3277	9.08916	39.1222	42.4422	45.5824	3.51143e-57	1.89651	up
WBGene00014000	ZK550.6	553	841	737	2731	3180	3074	14.9153	19.8799	16.5511	64.2913	70.3272	69.2604	2.75254e-57	1.72194	up
WBGene00013900	ugt-18	20	31	48	753	747	519	0.331107	0.438521	0.66097	10.9013	10.1548	7.19681	2.30731e-57	3.86901	up
WBGene00006590	toc-1	2491	2868	3011	1552	1459	1532	39.5355	42.1803	42.1166	22.6598	20.102	21.4637	1.70508e-57	-1.22118	down
WBGene00001813	haf-3	3234	3236	3505	1858	1811	1847	40.1422	35.1922	36.2293	20.1181	18.4215	19.1446	1.60735e-57	-1.1995	down
WBGene00009813	haly-1	2678	2838	3304	1352	1392	1591	30.6382	28.4503	31.4813	13.4947	13.0508	15.1966	7.89579e-58	-1.36274	down
WBGene00000835	cuc-1	1315	1382	1440	517	591	495	88.2284	81.2889	80.4919	30.2658	32.5043	27.7029	7.80609e-58	-1.70585	down
WBGene00021956	Y57E12AL.1	2241	2408	2831	6205	6556	6341	40.0548	37.7102	42.128	96.7404	95.9988	94.6089	7.62911e-58	1.00645	up
WBGene00011488	nra-2	6152	7746	8634	4329	4650	4494	92.9638	102.583	108.644	57.0686	57.5894	56.7122	6.93375e-58	-1.07814	down
WBGene00021879	clec-83	1102	1374	1396	3774	4450	3903	38.2633	42.0095	40.1897	115.585	127.994	113.378	4.3286e-58	1.29753	up
WBGene00008560	pho-13	623	812	697	121	162	116	11.3491	12.9638	10.5666	1.91178	2.41142	1.75144	4.28304e-58	-2.71839	down
WBGene00009818	acbp-3	1668	2209	2302	783	894	903	97.57	113.266	112.152	39.9657	42.8686	44.1259	2.40018e-58	-1.59075	down
WBGene00002249	lap-1	7196	7205	7421	4394	4635	4228	124.763	109.473	107.154	66.47	65.8607	61.2222	2.18046e-58	-1.06799	down
WBGene00007938	C34F6.1	2463	3746	4369	1233	1084	963	19.6351	26.1718	29.0049	8.5743	7.08355	6.41168	2.15787e-58	-1.99891	down
WBGene00021082	zip-11	415	473	552	48	59	72	9.32733	9.32159	10.3397	0.931614	1.08704	1.35367	1.34632e-58	-3.26488	down
WBGene00019827	mop-25.1	2076	2331	2780	7380	7181	6444	34.0499	33.4507	37.8504	105.055	96.0031	87.8887	1.09753e-58	1.20234	up
WBGene00015915	C17G10.1	1836	1979	1984	868	929	933	32.1861	30.4121	28.8965	13.234	13.2961	13.6614	1.01443e-58	-1.42935	down
WBGene00008499	cyp-37A1	465	601	464	2372	2318	2316	8.25173	9.37316	6.85474	36.8414	33.8191	34.4277	1.01367e-58	1.83128	up
WBGene00006574	tin-13	2463	2658	2560	1218	1195	1293	159.536	150.905	138.078	68.8495	63.4312	69.9469	8.77175e-59	-1.39499	down
WBGene00000213	asm-3	1031	1164	1133	392	374	385	15.017	14.9472	13.7891	4.99085	4.49123	4.6647	7.95327e-59	-1.86419	down
WBGene00004059	pmp-2	1325	1496	1579	4051	4052	4152	17.0929	16.9184	16.9702	45.6328	42.8679	44.7595	4.25749e-59	1.12949	up
WBGene00023500	C11H1.9	2054	2325	2936	1046	1143	1065	36.7012	36.4031	43.7035	16.3004	16.7337	15.8863	3.52866e-59	-1.50002	down
WBGene00001523	gbh-2	453	495	520	1907	1963	1807	9.30464	8.91252	8.8942	34.2258	33.0979	31.0389	2.91999e-59	1.59523	up
WBGene00009431	dct-17	687	681	717	85	127	138	9.92698	9.79648	8.7066	1.22513	1.73641	1.40892	2.15899e-59	-2.87123	down
WBGene00020383	tin-44	2388	2585	2844	1418	1336	1363	43.1784	40.9639	42.8251	22.361	19.7954	20.5775	2.14128e-59	-1.26518	down
WBGene00012404	Y6G8.2	239	141	238	1690	1960	1563	2.96123	1.53499	2.46413	18.3422	19.9835	16.2365	1.70911e-59	2.67579	up
WBGene00003159	mcm-7	2681	2941	3199	1524	1747	1602	30.4188	29.2501	30.2295	15.0885	16.2507	15.1765	1.67147e-59	-1.1986	down
WBGene00000767	coq-8	3601	3614	4048	2170	2079	2050	42.2988	37.1961	39.5988	22.2393	20.0092	20.1117	1.59455e-59	-1.1821	down
WBGene00020658	argn-1	2289	2488	3015	1130	1310	1062	58.1397	55.3893	63.7812	25.0312	27.2643	22.5284	1.12836e-59	-1.48944	down
WBGene00012361	mrpl-12	3361	3635	4066	2209	2258	2235	143.255	135.782	144.316	82.165	78.8645	79.5452	1.01181e-59	-1.06512	down
WBGene00006220	str-176	471	379	411	2144	2119	2173	7.87235	5.56011	5.77736	31.5536	29.1303	30.3249	9.54435e-60	1.97732	up
WBGene00015916	ttc-4	1677	1614	1887	736	741	723	33.124	27.9243	31.0287	12.6731	11.9927	11.9207	9.17539e-60	-1.57402	down
WBGene00019090	F59A7.2	72	66	73	727	723	685	4.26622	3.42509	3.62839	37.975	35.4686	34.2556	8.73288e-60	2.9303	up
WBGene00011726	lpr-2	494	676	668	2333	2483	2303	4.01101	4.81196	4.51325	16.5365	16.5297	15.6218	8.72943e-60	1.60274	up
WBGene00001073	dpy-11	11718	14092	17122	8093	8235	8526	263.468	276.41	319.458	158.358	151.101	159.75	7.23704e-60	-1.1223	down
WBGene00004702	rsp-5	3138	3456	3491	1616	1732	1898	106.374	103.1	98.1788	46.5396	46.5589	50.603	7.20717e-60	-1.28606	down
WBGene00009957	F53B2.8	429	522	692	2676	2544	2360	14.6429	15.6043	19.6778	79.7039	71.1825	67.2862	5.6942e-60	1.85653	up
WBGene00000742	col-169	5947	6794	7366	3857	4231	4426	170.734	170.933	176.116	96.6233	99.5643	106.121	2.73776e-60	-1.02591	down
WBGene00000933	dap-3	4011	4510	4869	2768	2756	2837	89.7514	88.4316	90.7333	54.0422	50.5371	53.0182	1.28094e-60	-1.02134	down
WBGene00015993	C18H7.1	45	51	20	3464	4155	3992	0.81758	0.809973	0.295724	56.061	63.2666	61.1315	1.11622e-60	5.75734	up
WBGene00007001	tufm-2	2437	2754	2918	1456	1462	1314	45.6868	45.2535	45.5713	23.8206	22.469	20.5731	9.80587e-61	-1.27867	down
WBGene00022394	natb-1	1307	1424	1597	470	522	585	57.7306	55.1046	58.7468	18.1145	18.8751	21.5697	9.0006e-61	-1.78844	down
WBGene00007950	C35A5.6	194	233	138	1709	1559	1549	6.67902	7.0449	3.96174	51.6767	44.2444	44.8113	6.78763e-61	2.68959	up
WBGene00020200	T04A6.1	231	200	239	1930	1785	1306	10.4719	7.94423	9.09563	76.3854	66.3987	49.4244	6.28642e-61	2.5188	up
WBGene00022176	Y71H2AM.11	2602	2595	2915	1205	1357	1390	44.3347	38.7405	41.3622	17.9074	18.9542	19.779	3.8278e-61	-1.38039	down
WBGene00020577	T19D12.2	1135	1216	1266	3506	3938	3576	13.4492	12.2563	12.0653	36.0471	37.034	35.442	2.98535e-61	1.2543	up
WBGene00006565	tfg-1	4462	5013	5962	2475	2795	2933	70.3279	69.4112	75.5141	33.2325	34.7321	36.8148	2.73157e-61	-1.24942	down
WBGene00017347	F10E7.5	4660	4581	4755	2575	2611	2531	162.659	140.02	138.07	78.3184	74.7005	73.6761	1.78696e-61	-1.20676	down
WBGene00010887	M7.12	212	201	240	1505	1419	1187	6.38424	5.28851	6.00497	39.5831	35.0418	29.8803	1.73561e-61	2.28068	up
WBGene00011849	T19H5.4	1069	1333	1593	4360	4930	4384	30.7088	33.1021	37.2495	111.06	114.174	105.298	1.63237e-61	1.43022	up
WBGene00000990	dhs-27	1906	2192	2575	964	865	983	49.7266	50.1235	55.9575	21.9437	18.4886	21.4238	8.81928e-62	-1.5774	down
WBGene00018286	F41E6.5	279	354	487	2289	2125	1960	5.99659	6.60398	8.73579	41.719	35.6738	34.4554	8.36655e-62	2.15426	up
WBGene00008621	F09C8.1	682	592	593	46	26	68	15.0978	11.4785	10.9248	0.869818	0.461306	1.25658	7.42501e-62	-3.94638	down
WBGene00044318	tag-267	1787	1811	2003	793	884	769	73.0091	64.8449	68.1558	28.2759	29.6021	26.2303	6.15312e-62	-1.5362	down
WBGene00001775	gst-27	5193	5843	5742	3200	3118	3424	194.498	191.796	179.124	104.574	95.7166	107.091	5.85418e-62	-1.12849	down
WBGene00008971	F20C5.6	465	517	630	2543	2157	2481	8.83806	8.61619	9.97701	42.2141	33.6304	39.4058	3.40906e-62	1.80312	up
WBGene00002079	xpo-2	3202	3571	3833	2011	2144	2125	27.8418	26.7728	27.7009	15.1195	15.0382	15.1852	2.19228e-62	-1.09863	down
WBGene00022131	Y71F9B.13	730	895	844	2829	3059	3347	26.5366	27.096	24.2765	90.9544	92.9932	102.128	1.89489e-62	1.54903	up
WBGene00017789	F25E5.8	2497	2437	2921	8204	8666	7247	77.2141	61.1214	68.8666	160.072	155.372	152.538	2.64175e-63	1.26671	up
WBGene00003599	nhl-3	962	1143	1148	3557	3430	3365	12.2349	12.8442	12.0583	39.1717	35.172	35.1429	2.41824e-63	1.32058	up
WBGene00017565	ddo-2	1264	1197	1601	4401	5054	5039	31.1383	26.6365	34.0634	93.8372	102.89	106.571	2.31421e-63	1.48348	up
Caenorhabditis_elegans_newGene_671	-	264	249	287	1562	1624	1333	6.91892	5.71379	6.27848	35.7919	34.9556	29.2378	1.99518e-63	2.12789	up
WBGene00004411	rpc-1	4214	4632	4606	2645	2747	2602	26.6965	25.7156	24.2975	14.6219	14.263	13.7658	1.85681e-63	-1.09673	down
WBGene00010133	F55H12.2	153	245	236	1456	1537	1283	3.05666	4.2937	3.92395	25.4443	25.2347	21.4615	1.76475e-63	2.38584	up
WBGene00004495	rps-26	48929	61376	57398	32138	35261	36900	3083.35	3387.91	3009.51	1764.81	1818.03	1940.42	1.6536e-63	-1.02856	down
WBGene00000991	dhs-28	3752	4570	4759	10590	12289	12107	74.003	78.9918	78.1775	182.274	198.682	199.446	1.13698e-63	1.07291	up
WBGene00016716	acs-17	2024	2294	2603	6952	7483	6222	21.5755	21.6788	23.3982	65.0968	63.4301	53.7121	7.67432e-64	1.23016	up
WBGene00001156	ech-7	6286	6809	7421	3378	3932	4135	223.404	212.073	219.66	104.745	114.544	122.738	6.26756e-64	-1.18516	down
WBGene00006686	twk-34	179	220	297	1444	1663	2008	2.32406	2.51296	3.22224	16.424	17.7762	21.8635	6.18856e-64	2.50797	up
WBGene00013220	ctl-3	297	473	446	2076	2185	2036	5.24746	7.468	6.60121	32.0001	31.9658	30.2177	5.15874e-64	2.01694	up
WBGene00016493	C37A2.7	30883	38674	34845	19582	22161	21645	1911.73	2097.96	1796.35	1057.73	1124.4	1118.99	4.82453e-64	-1.06491	down
WBGene00020600	trd-1	2903	3089	3504	1651	1735	1496	32.1532	29.9805	32.3254	15.9534	15.7521	13.8335	3.93266e-64	-1.30079	down
WBGene00006984	zig-7	323	307	313	1752	2053	1573	10.8659	9.05062	8.78258	51.5436	56.7427	44.2877	3.02311e-64	2.13685	up
WBGene00001774	gst-26	2724	3120	3456	1551	1584	1706	105.516	106.14	111.544	52.4863	50.3429	55.0259	2.66427e-64	-1.28024	down
WBGene00004916	snr-3	3936	4355	4369	2121	2257	2445	175.039	169.722	161.931	82.2822	82.2541	90.7873	2.4284e-64	-1.23583	down
WBGene00009595	cbp-3	631	675	811	2734	2917	2478	17.7506	17.2798	20.8805	72.3108	72.3733	57.8181	2.21292e-64	1.58877	up
WBGene00022146	rml-5	3560	4130	5163	1998	2195	1995	79.7706	81.0579	96.4581	39.0227	40.2716	37.3049	1.68531e-64	-1.38745	down
WBGene00013668	slc-30A5	3825	4322	4760	2532	2619	2357	41.0426	40.6432	42.5331	23.702	23.0318	21.1238	1.66245e-64	-1.12268	down
WBGene00010262	droe-4	1967	1706	1933	6268	6886	7363	72.7689	55.3044	59.5663	202.419	208.886	227.566	1.63983e-64	1.51044	up
WBGene00008486	ugt-44	594	664	650	2306	2807	2498	9.06307	8.87865	8.2622	30.7217	35.1297	31.8557	9.37994e-65	1.63717	up
WBGene00019357	cpg-8	457	627	763	2885	3187	2706	22.7396	27.4342	30.9999	117.316	128.35	106.76	9.25197e-65	1.89932	up
WBGene00022246	acp-7	229	284	368	1805	2201	1621	4.30529	4.68238	5.77451	29.6677	33.9841	25.4975	8.74813e-65	2.31064	up
WBGene00010052	F54D5.7	5076	5152	6048	2912	3081	3255	102.766	91.4689	101.896	51.5144	51.1225	55.0789	8.68758e-65	-1.15814	down
WBGene00044789	T07A9.14	3740	4170	4165	2148	1919	2128	108.484	106.004	100.617	54.374	45.6179	51.5578	8.66378e-65	-1.30465	down
WBGene00011270	R31.2	2495	2703	2832	7296	7341	6748	42.6718	40.8226	47.7765	150.537	147.775	137.151	7.92058e-65	1.06348	up
WBGene00003119	mac-1	3692	4162	4078	2184	2374	2221	39.6953	39.216	36.5125	20.4857	20.9146	19.936	7.90497e-65	-1.161	down
WBGene00017467	F14F9.4	110	98	84	1137	961	950	1.06312	0.831063	0.674763	9.66236	7.67435	7.72562	6.73996e-65	2.97167	up
WBGene00015298	rml-4	4881	6076	7467	2769	3043	2969	69.7919	76.4041	89.0615	34.6173	35.6903	35.3066	6.10723e-65	-1.3994	down
WBGene00001430	fkb-5	4771	6505	7889	2113	2427	2668	140.085	161.177	183.943	51.1548	56.6582	62.7936	4.18785e-65	-1.73265	down
WBGene00007455	ugt-22	3361	4082	4491	1992	1674	1795	45.4545	48.3791	50.5807	23.4994	18.5512	20.2739	3.66294e-65	-1.46028	down
WBGene00007440	C08E8.4	30	38	53	724	712	592	0.88568	0.978207	1.28552	18.6984	17.2924	14.6402	2.8937e-65	3.62389	up
[truncated: 572 more rows]

## Sheet: LM_DEG
HQ	WormBase Gene ID	gene_name	HQ-CeMM1_FPKM	HQ-CeMM1_count	HQ-CeMM2_FPKM	HQ-CeMM2_count	HQ-CeMM3_FPKM	HQ-CeMM3_count	HQ-OP501_FPKM	HQ-OP501_count	HQ-OP502_FPKM	HQ-OP502_count	HQ-OP503_FPKM	HQ-OP503_count	FDR	log2FC	regulated
EVM0014145	WBGene00017048	D2021.4	1.778	55	2.13538	59	2.05118	60	1.12192	38	0.351301	10	0.771642	23	0.00822321	1.02848	up
EVM0013983	-	-	2.15844	62	1.71174	44	1.0211	28	0.767936	24	0	0	0.253389	7	0.00794052	1.13266	up
Caenorhabditis_elegans_newGene_1095	-	-	1.62397	61	1.21364	41	0.846814	30	0.152488	7	0.879152	16	0.543334	19	0.00765861	1.09671	up
EVM0003204	WBGene00019730	asns-2	38.1329	2132	33.7156	1700	30.2345	1610	0.238414	15	0	0	0.446686	24	0.00604699	1.03437	up
EVM0001157	WBGene00018430	nhr-142	1.44743	62	2.13262	82	2.38896	96	0.29223	14	1.38445	54	0.540116	22	0.0058203	1.06887	up
EVM0012930	-	-	0.732014	18	0.847666	19	0.624021	15	2.06802	56	1.79475	41	2.91509	68	0.00555585	-1.07153	down
EVM0003829	WBGene00044460	Y55F3C.10	1.44596	40	1.61965	40	2.18822	57	0.63123	19	0.760889	19	0.434283	12	0.00548289	1.0909	up
Caenorhabditis_elegans_newGene_2145	-	-	5.8105	66	4.56228	47	4.31859	47	2.27454	29	1.81081	19	1.60527	17	0.00547654	1.04814	up
EVM0014308	WBGene00018288	F41E6.7	0.706638	12	1.31506	21	2.0439	33	4.71404	88	3.9663	62	3.48961	56	0.00521913	-1.06307	down
EVM0016175	WBGene00009228	F28G4.3	1.08054	37	0.940496	29	2.35322	76	0.24112	9	0.397412	13	0.620981	20	0.00442755	1.16099	up
EVM0011932	WBGene00011407	ppat-1	1.37443	83	1.03457	57	1.01141	59	0.647962	43	0.408487	23	0.306638	18	0.00423174	1.0463	up
EVM0017089	WBGene00011918	T22C1.8	0.748143	40	0.804238	39	0.538939	28	0.102591	6	0.28085	14	0.163391	9	0.00405895	1.18582	up
EVM0008630	WBGene00011179	R09H10.1	2.4046	62	2.8241	66	3.65499	89	1.6335	46	1.11032	27	1.01035	25	0.00399341	1.01107	up
EVM0001105	-	-	1.02373	24	1.08153	23	1.27576	28	3.80518	96	4.29684	91	1.8423	40	0.00398843	-1.06616	down
EVM0013276	-	-	0.197413	12	0.356771	18	0.439131	24	1.02024	63	1.81692	93	0.656826	35	0.00397503	-1.13391	down
EVM0013778	-	-	2.07559	108	1.3623	64	0.891349	44	0.789467	45	0.084012	4	0.324801	16	0.00388806	1.18036	up
EVM0001760	WBGene00017814	F26A10.2	0.295261	14	0.496057	21	0.159644	8	1.04626	54	1.45262	63	0.958248	42	0.00386853	-1.14773	down
Caenorhabditis_elegans_newGene_2453	-	-	7.02085	78	8.18756	82	9.99264	106	3.46323	42	1.94721	20	5.25604	55	0.00338172	1.02724	up
Caenorhabditis_elegans_newGene_2511	-	-	1.17847	34	1.83074	47	2.11689	58	0.694564	22	0.370377	10	0.49299	14	0.00309507	1.16864	up
EVM0017255	-	-	2.0403	58	4.15576	106	2.63588	71	0.822826	26	1.7934	47	0.573108	16	0.00309425	1.11278	up
EVM0014724	WBGene00045146	Y41E3.22	12.6803	131	13.7807	129	9.80315	97	2.04132	24	5.29685	51	8.04983	78	0.00300293	1.03425	up
EVM0015036	-	-	1.4989	100	1.08735	66	1.18924	76	0.486692	36	0.729331	45	0.46188	29	0.00276026	1.00739	up
EVM0005856	WBGene00012610	Y38F1A.8	2.79143	83	4.81471	129	2.57129	73	1.76871	58	0.696488	19	1.57792	44	0.00261476	1.07364	up
EVM0007197	WBGene00013207	zipt-2.3	0.276249	8	0.775595	20	0.873058	24	2.4005	74	2.31559	60	1.97505	53	0.00254479	-1.16456	down
EVM0013121	-	-	1.70546	83	2.56331	112	3.40725	157	0.804987	43	1.70646	76	0.947816	43	0.00251573	1.00335	up
EVM0007032	WBGene00015683	C10G8.4	1.47581	36	2.05077	44	1.93498	44	0.806058	22	0.180559	4	0.179033	5	0.00242561	1.25309	up
Caenorhabditis_elegans_newGene_237	-	-	0.212041	15	0.273439	18	0.425721	29	1.04556	69	1.08558	55	1.1495	75	0.00240217	-1.12553	down
EVM0004899	-	-	0.168169	47	0.066662	17	0.266032	70	0.3829	116	0.444698	113	0.56462	146	0.00233173	-1.06307	down
EVM0001496	-	-	10.2545	169	11.4967	170	12.9598	203	6.06957	110	7.6534	116	1.76177	28	0.00228652	1.00601	up
EVM0001547	-	-	0	0	0.358207	10	0.160733	5	1.43972	47	1.00343	28	1.31391	37	0.00216685	-1.28299	down
EVM0010612	WBGene00001548	gcy-23	0.748842	76	0.588803	54	0.57781	56	0.25064	28	0.271814	26	0.051015	5	0.00213614	1.20564	up
EVM0012430	WBGene00016447	msd-4	2.5912	74	1.84631	48	2.70382	74	1.25397	39	0.605368	16	0.737636	20	0.00206251	1.13316	up
EVM0010644	-	-	4.83999	73	8.16996	111	10.3291	148	0.732403	13	0	0	0.386147	6	0.00157313	1.26472	up
EVM0010540	WBGene00008732	F13B12.4	1.39128	71	0.67293	31	1.2149	59	0.304899	17	0.320605	15	0.397985	19	0.00138276	1.22551	up
EVM0003633	WBGene00011696	eea-1	1.0594	76	1.03653	67	0.755513	52	0.365033	29	0.428072	29	0.214056	15	0.00136437	1.16027	up
EVM0007590	WBGene00011180	R09H10.2	2.21293	77	2.73992	86	2.50228	83	1.0049	38	1.10374	35	1.19238	39	0.00129256	1.03831	up
EVM0013076	-	-	9.58161	156	7.66221	113	8.02446	125	3.53758	64	5.0942	77	1.06432	17	0.00110484	1.12951	up
EVM0017312	WBGene00009663	hda-5	1.20281	65	0.366739	18	0.409595	21	1.90889	112	2.35887	117	2.01639	102	0.00103572	-1.17321	down
EVM0001657	-	-	6.06307	132	2.98571	59	1.41591	30	1.21639	29	0.553985	12	0.991105	21	0.000920996	1.29688	up
EVM0000618	WBGene00010348	H01G02.1	5.85308	146	8.77233	196	5.99916	142	4.73885	129	2.63239	60	2.04843	48	0.000896712	1.01438	up
Caenorhabditis_elegans_newGene_1810	-	-	1.62935	48	3.40037	90	2.03726	47	7.08355	226	4.67947	125	6.29322	142	0.000880215	-1.02977	down
EVM0005728	WBGene00012253	clec-50	2.08167	88	2.61129	100	2.3868	96	0.94117	44	0.191745	8	1.12364	45	0.00086377	1.23303	up
EVM0009845	WBGene00009213	thn-1	1.33333	44	2.99267	88	3.20832	99	5.75662	205	8.91995	266	4.3946	134	0.000833427	-1.03293	down
EVM0016702	WBGene00007480	glna-1	0.395375	29	0.450193	30	0.38331	27	1.19397	94	1.1662	77	1.14955	78	0.000833427	-1.10814	down
EVM0007729	WBGene00010925	mfsd-11	0.967608	51	0.615421	29	0.795853	40	1.59029	91	2.05775	99	2.86772	141	0.000752594	-1.09259	down
EVM0017005	WBGene00013960	cutl-8	0.860163	11	0	0	0.49119	6	2.8529	40	3.1781	37	3.80125	46	0.000718963	-1.3955	down
EVM0003175	WBGene00003954	pcm-1	2.7854	101	2.02663	66	1.62705	56	0.824623	33	0.346228	12	0.864042	30	0.000558514	1.25553	up
EVM0008623	-	-	1.00759	48	1.24764	54	1.24732	57	0.383266	20	0	0	0.242881	11	0.000528708	1.41355	up
Caenorhabditis_elegans_newGene_1248	-	-	0.680389	16	0.30663	7	0.602504	14	1.88256	49	2.20634	48	2.96203	65	0.000518672	-1.34059	down
Caenorhabditis_elegans_newGene_2230	-	-	18.4018	123	24.2293	145	28.2996	179	5.43578	40	8.83041	54	15.5664	97	0.000515261	1.10066	up
EVM0007585	WBGene00018640	F49E10.2	0.679506	50	0.540323	36	0.310028	22	0.952217	76	1.73612	116	2.27659	156	0.000410202	-1.21736	down
EVM0009887	WBGene00000649	col-73	2.15666	63	1.62874	43	1.49243	42	0.201278	7	0.586141	16	0.493634	14	0.000398052	1.37628	up
EVM0003620	WBGene00001159	eff-1	0.691249	52	0.977292	66	1.5258	108	2.09639	170	2.97146	202	2.68192	187	0.000370993	-1.01139	down
EVM0008412	WBGene00008545	F07A11.1	1.19653	75	0.649528	37	1.75862	105	3.06146	211	2.91402	168	2.97735	176	0.000347173	-1.04324	down
EVM0004114	-	-	1.13585	34	0.97817	27	0.830107	24	3.66596	120	2.66748	73	2.71121	76	0.000346504	-1.19266	down
Caenorhabditis_elegans_newGene_1417	-	-	6.78858	74	7.07667	70	7.44639	77	3.15584	38	2.2943	23	0.765489	8	0.000344625	1.32069	up
EVM0005723	WBGene00007455	ugt-22	0.524388	27	0.933779	42	1.07776	52	2.49271	136	2.78986	128	1.9422	91	0.000311088	-1.14387	down
EVM0001867	-	-	4.31478	72	4.23372	63	3.95946	63	1.20564	22	1.27057	20	1.72958	27	0.000307228	1.25721	up
EVM0000301	-	-	6.24803	91	7.05114	92	10.5164	145	2.77103	44	1.48992	20	4.14562	57	0.000262283	1.23267	up
EVM0005279	WBGene00000428	ceh-1	1.08018	35	1.51553	45	1.16224	36	4.0516	144	2.98298	89	3.36745	103	0.000240934	-1.13655	down
EVM0014840	-	-	3.44663	80	5.53141	115	4.66975	103	1.74651	44	1.71299	37	2.05654	45	0.000237689	1.14378	up
EVM0002556	WBGene00019550	K09C4.5	1.18637	59	0.749491	34	1.17521	55	2.56526	138	2.48534	112	3.00601	139	0.000228928	-1.07538	down
EVM0008914	-	-	1.81443	68	1.55147	52	0.894449	32	0.409636	17	0.352857	12	0.184357	7	0.000201111	1.44154	up
EVM0000272	-	-	5.79906	108	8.62486	144	6.89746	122	2.40607	49	4.17316	71	2.4567	43	0.000187172	1.12033	up
EVM0011704	-	-	5.6795	98	4.14049	65	5.36444	89	2.36714	45	0.713035	12	1.51235	25	0.000187039	1.32512	up
EVM0010827	WBGene00011643	slc-17.9	0.4023	29	0.501464	33	0.542736	37	1.18443	93	1.25113	82	2.07664	139	0.000185554	-1.22302	down
EVM0012637	WBGene00010943	M176.4	3.36488	56	3.04466	46	3.60094	57	7.52839	136	8.36284	127	8.71854	135	0.000182914	-1.03329	down
EVM0006272	-	-	4.20568	115	3.74467	92	5.24207	136	1.63984	49	2.42747	61	0.935307	24	0.000180141	1.20321	up
EVM0007654	WBGene00014208	znfx-1	1.11502	85	1.17122	80	0.94239	68	0.419862	35	0.305696	22	0.40766	29	0.000163748	1.25006	up
EVM0004994	-	-	3.58791	146	3.61565	133	2.75289	107	1.84367	83	1.26607	48	1.21042	47	0.000159218	1.08664	up
EVM0000920	-	-	19.0072	219	28.5824	296	44.9045	491	0.521552	7	3.86736	41	0.679423	8	0.000156377	1.52009	up
EVM0008291	WBGene00017868	slc-28.2	1.06142	101	1.25449	107	0.803357	73	0.351181	37	0.481388	42	0.342696	31	0.000149753	1.20896	up
EVM0002490	WBGene00018286	F41E6.5	1.79204	67	4.61249	154	2.65589	94	0.613952	25	1.45852	50	0.623759	22	0.000125955	1.36373	up
EVM0012616	-	-	0.194563	5	0.505107	11	0.376726	9	1.86194	49	1.64477	36	3.05269	68	0.000113431	-1.51462	down
Caenorhabditis_elegans_newGene_184	-	-	4.88855	145	4.41573	119	3.05935	87	1.6349	54	2.00122	55	1.25732	36	9.3671e-05	1.17892	up
EVM0002165	-	-	72.9658	988	69.0286	843	69.7242	899	38.7292	575	19.6097	244	33.5114	427	8.89197e-05	1.10673	up
EVM0001644	-	-	1.13676	52	0.959984	40	0.980973	43	2.62892	131	2.74262	115	2.83198	121	8.89197e-05	-1.11825	down
EVM0010422	WBGene00007104	B0024.15	0.725342	22	0.80221	22	1.70921	49	4.34732	143	3.34486	93	3.49422	99	6.02775e-05	-1.33167	down
EVM0012292	WBGene00019763	galt-1	1.20813	30	1.38712	31	1.89514	45	0.28568	8	0	0	0	0	5.87934e-05	1.62337	up
EVM0004961	-	-	3.6812	43	5.47507	57	3.61694	40	0	0	0.680248	8	0.851485	10	5.70534e-05	1.61729	up
EVM0011397	WBGene00022843	ZK1055.2	3.77971	133	1.72351	55	3.08874	103	0.524272	21	1.22397	40	0.763615	26	5.39126e-05	1.39483	up
EVM0001680	-	-	23.7154	176	17.3623	116	29.2627	207	8.24237	67	12.071	83	11.1272	78	5.35702e-05	1.08966	up
EVM0002353	-	-	2.99706	49	2.20508	33	3.40314	53	0.509633	10	0.20111	4	0.658676	11	5.33208e-05	1.57717	up
EVM0009690	WBGene00011587	anp-1	0.347885	31	0.252182	21	0.110984	10	0.98509	96	1.46385	119	0.717245	60	5.02141e-05	-1.45837	down
EVM0005049	WBGene00043097	C02D5.4	5.52883	114	5.42814	101	10.3312	202	3.06978	70	2.34755	45	2.67054	52	4.6602e-05	1.22184	up
EVM0000193	-	-	2.30893	41	3.02616	49	3.04123	52	0	0	0.514425	9	0.48592	9	3.64747e-05	1.65119	up
EVM0015214	WBGene00020386	dach-1	1.75086	85	1.65307	72	2.83948	130	0.563101	30	0.875019	39	0.590463	27	3.61239e-05	1.35025	up
EVM0009366	WBGene00006436	ttn-1	0.115018	34	0.129021	34	0.080493	23	0.348225	111	0.31858	85	0.419051	114	3.45174e-05	-1.31302	down
Caenorhabditis_elegans_newGene_252	-	-	6.9866	139	6.00023	108	6.27031	119	2.97718	65	2.86768	53	1.87763	35	3.27483e-05	1.19274	up
EVM0015363	WBGene00008799	F14E5.1	1.26398	59	1.17728	49	1.76486	78	4.00159	202	3.44462	146	3.40214	147	2.92261e-05	-1.11024	down
EVM0013047	WBGene00010197	F57C2.5	1.66382	80	2.21283	95	3.10731	141	0.346105	19	0.87124	39	0.847661	38	2.38316e-05	1.41859	up
EVM0006179	WBGene00001624	glt-6	2.17428	112	2.52967	117	1.64279	80	0.867057	49	0.547192	26	0.747629	36	2.38145e-05	1.3255	up
EVM0008639	WBGene00004028	pif-1	0.171592	23	0.103678	13	0.166785	21	0.625244	89	0.605669	73	0.603963	74	2.21851e-05	-1.45259	down
EVM0005717	WBGene00010893	cutl-9	1.18457	72	1.3559	74	1.02714	59	2.56056	170	4.05046	225	2.70008	153	2.14443e-05	-1.12629	down
EVM0004161	WBGene00019060	acox-3	3.19294	207	2.23158	131	3.20569	198	1.55596	111	1.10124	66	1.22389	75	2.03718e-05	1.09036	up
EVM0006563	WBGene00007650	ugt-23	0.395464	13	0.335898	10	0.638757	20	1.70298	61	2.11582	63	2.95321	90	2.03276e-05	-1.54872	down
EVM0002812	WBGene00018996	F57B9.1	3.42367	109	3.17663	92	3.66465	111	1.52645	54	0.787735	24	1.15784	35	2e-05	1.32278	up
EVM0017218	WBGene00016234	C29G2.6	4.09446	82	6.21213	112	3.72524	71	1.10759	25	1.90266	35	0.702219	14	1.55681e-05	1.49211	up
Caenorhabditis_elegans_newGene_1545	-	-	2.02283	52	2.54982	59	1.70475	42	0.569441	16	0.218251	6	0.274265	7	1.54991e-05	1.64863	up
EVM0002135	WBGene00009727	lips-1	0.338718	11	0.292431	8	0.541854	16	3.96689	131	1.21433	34	2.29109	65	1.53704e-05	-1.64447	down
EVM0004542	WBGene00044455	F23F12.13	1.42805	64	1.1368	46	1.33541	57	3.24428	158	3.71327	151	3.42534	143	1.39679e-05	-1.14396	down
EVM0004309	WBGene00013704	Y106G6D.8	15.6196	179	15.845	164	16.4271	179	8.41527	106	4.08644	43	7.10238	77	1.15454e-05	1.18518	up
EVM0014801	WBGene00011462	vap-2	2.81366	157	1.25471	63	2.27659	121	5.0722	310	5.51468	282	5.11057	268	9.28132e-06	-1.08624	down
EVM0012621	-	-	4.09625	213	4.42408	207	5.49298	272	1.8496	106	2.21868	106	2.77156	136	8.28e-06	1.02053	up
EVM0015253	WBGene00006692	twk-42	1.32537	55	1.36171	51	1.4987	59	4.72423	213	2.76173	104	5.03337	194	7.94827e-06	-1.26352	down
EVM0003799	WBGene00013923	ghi-1	4.13379	207	3.1434	142	4.5294	216	1.33998	74	2.05416	95	1.87029	88	7.89572e-06	1.1178	up
EVM0010668	WBGene00022631	nekl-2	5.18065	185	4.45161	144	5.68541	193	2.40115	94	2.4673	81	2.30477	78	7.37648e-06	1.06515	up
EVM0013394	WBGene00000175	aqp-7	0.573094	18	1.75826	49	1.29831	38	4.63937	155	4.81186	135	4.03541	116	6.9936e-06	-1.43105	down
EVM0004495	WBGene00007455	ugt-22	1.62152	79	1.5697	69	2.7147	126	0.654116	35	0.304884	14	0.551368	26	6.84254e-06	1.53159	up
EVM0014363	WBGene00019977	fpn-1.2	2.27209	115	2.33014	106	2.88756	139	0.815573	45	1.16988	55	0.689688	33	6.64579e-06	1.31845	up
EVM0000001	-	-	7.9558	218	7.82161	193	7.53475	196	3.19379	96	4.00019	101	4.29866	111	6.41607e-06	1.0132	up
EVM0008398	-	-	5.802	108	6.7059	112	5.0221	89	1.745	36	1.99688	34	2.1933	39	6.08149e-06	1.35909	up
EVM0006647	WBGene00021731	Y49G5A.1	3.70589	69	3.50455	59	4.82824	85	1.16865	24	0.331061	6	0.966337	17	5.92114e-06	1.64135	up
EVM0012202	WBGene00004028	pif-1	0.51272	95	0.549187	92	0.434528	77	0.151957	31	0.168919	29	0.136228	24	5.33331e-06	1.43976	up
Caenorhabditis_elegans_newGene_1377	-	-	0.940779	29	0.684513	19	1.02407	30	3.4715	115	4.67647	124	2.61037	74	4.91723e-06	-1.47788	down
EVM0009708	WBGene00020962	W02H5.8	1.52648	87	1.74216	90	1.88896	103	0.502481	32	0.436244	23	0.652481	35	4.66639e-06	1.43493	up
EVM0012774	WBGene00000530	clh-3	3.03339	262	2.32796	181	2.90116	239	1.41184	134	1.52694	121	1.0412	85	4.57886e-06	1.03986	up
EVM0016303	WBGene00021082	zip-11	2.21681	65	2.21218	59	0.875048	25	5.63674	182	5.25636	142	6.8782	190	4.52719e-06	-1.36798	down
EVM0002991	WBGene00004405	rop-1	4.48719	374	3.17681	239	5.11798	406	2.39764	219	1.97629	152	0.968561	76	4.31843e-06	1.18253	up
EVM0014698	WBGene00008583	ugt-65	0.308314	16	0.477181	22	0.83814	40	2.0461	112	2.3224	107	2.31569	109	3.99041e-06	-1.51106	down
Caenorhabditis_elegans_newGene_1207	-	-	0.297803	8	1.10263	26	0.555594	14	4.10192	115	4.09617	96	2.59733	63	3.9183e-06	-1.65768	down
EVM0012258	WBGene00019764	M03F8.5	1.26092	78	1.39986	78	1.28602	76	2.90171	197	3.25596	185	3.5328	205	3.87746e-06	-1.08697	down
Caenorhabditis_elegans_newGene_1537	-	-	2.16237	71	1.81954	57	1.9627	67	0.458729	18	0	0	0.258444	9	3.82045e-06	1.79434	up
EVM0003738	WBGene00010595	haao-1	6.03838	178	5.02032	134	4.8444	136	1.67628	55	2.34518	64	0.552211	16	3.76099e-06	1.48604	up
EVM0009320	WBGene00010204	cpr-9	7.13519	270	7.88547	269	8.59166	309	4.96886	206	2.85814	100	3.5403	126	3.68276e-06	1.03517	up
EVM0016544	WBGene00013597	gpi-1	2.89686	197	3.65426	224	3.71674	240	1.48441	111	1.72612	108	1.81694	116	3.1906e-06	1.02557	up
EVM0000264	-	-	12.3167	238	12.7304	222	15.8774	292	6.15512	131	5.82922	104	8.12227	148	3.11886e-06	1.01784	up
EVM0000886	-	-	7.33218	35	11.4915	49	10.5237	48	1.01995	6	0.292044	2	1.8127	8	3.03936e-06	1.82116	up
EVM0009814	WBGene00022104	acsd-1	12.0142	265	10.5235	209	11.5449	242	6.68902	162	4.82395	98	3.31536	69	2.96049e-06	1.14357	up
EVM0014277	WBGene00009483	F36G3.2	3.12598	153	2.84849	126	4.55492	213	1.13268	61	1.07692	49	1.7151	79	2.73667e-06	1.29642	up
EVM0013567	WBGene00016970	C56E6.2	3.78586	219	5.27331	275	5.38638	296	2.70094	171	2.31859	123	2.06591	112	2.69488e-06	1.02397	up
EVM0002182	WBGene00012017	shpk-1	4.09027	178	4.49993	177	4.83321	200	1.8078	86	2.49975	100	1.44603	59	2.67918e-06	1.17187	up
EVM0013953	WBGene00001636	gly-11	2.20411	173	1.83665	130	1.98275	148	0.937239	81	0.55582	40	0.803796	59	2.50789e-06	1.27521	up
EVM0000873	WBGene00007964	cyp-25A2	4.29784	180	4.60031	174	4.87202	194	2.07151	95	2.3648	91	1.33485	53	2.12814e-06	1.19097	up
EVM0006775	WBGene00013083	Y51A2D.18	1.76892	91	2.42954	112	2.02677	99	4.84049	271	6.24028	293	4.2614	205	1.67705e-06	-1.09519	down
EVM0004067	WBGene00010760	K10H10.4	9.79624	207	10.6708	204	6.60199	133	3.81251	89	3.68541	72	3.43158	69	1.47853e-06	1.2261	up
EVM0014753	WBGene00010408	mboa-2	4.39937	323	4.9979	331	5.07886	355	2.70076	218	1.59845	108	2.72719	189	1.31698e-06	1.0338	up
EVM0008989	WBGene00003624	nhr-28	5.14062	194	4.71419	160	3.96114	142	1.82244	76	1.25928	44	2.16379	77	1.28954e-06	1.28364	up
EVM0011040	WBGene00016398	C34D4.2	0.380402	12	0.286223	8	0.311399	10	2.37743	80	1.82779	52	2.1991	64	1.11747e-06	-1.76628	down
EVM0012167	WBGene00016266	idhg-2	10.8038	595	7.66798	381	6.69551	351	4.39429	265	2.60533	132	4.68654	243	1.10336e-06	1.08819	up
EVM0004911	WBGene00014052	ZK669.2	14.2293	343	11.57	251	10.9363	251	6.99257	185	6.15033	136	4.85195	110	1.07762e-06	1.03015	up
EVM0001210	WBGene00009512	bigr-1	3.45492	90	3.11628	73	5.93824	146	1.04433	30	1.1861	29	1.08632	27	1.06262e-06	1.56431	up
EVM0011984	WBGene00011850	T20B3.1	1.90528	129	2.02791	123	1.09106	70	4.24321	313	4.27116	264	4.34216	275	9.44738e-07	-1.14086	down
EVM0015646	WBGene00017515	F16F9.4	3.37092	187	3.53011	177	3.60221	190	1.83051	111	0.88151	45	1.19803	63	8.9036e-07	1.30693	up
EVM0012549	WBGene00007338	C05C12.6	1.44958	51	1.99809	64	2.17007	73	5.43312	209	4.67466	151	6.23464	205	7.59808e-07	-1.26935	down
EVM0001804	WBGene00013748	ssu-1	3.77645	200	5.59279	267	3.25998	164	10.1866	589	7.79458	378	11.424	567	5.60905e-07	-1.04278	down
EVM0004686	WBGene00000050	acr-11	1.46893	90	2.90559	159	2.5781	149	5.14972	342	6.17077	344	6.29871	359	5.06697e-07	-1.13539	down
EVM0005431	-	-	3.8471	167	4.9738	195	4.69633	194	1.64145	78	2.17781	87	1.87706	77	4.99045e-07	1.20159	up
EVM0011218	-	-	5.48761	316	4.21509	219	6.49386	355	1.89995	120	2.35493	125	3.07669	166	4.92703e-07	1.12589	up
EVM0011959	-	-	11.9481	224	12.0929	204	11.2451	201	5.0375	104	6.34558	109	4.84221	86	4.90559e-07	1.10703	up
EVM0002486	WBGene00001756	gst-8	12.2153	296	9.07716	199	9.0029	208	3.61924	96	2.50007	56	5.38923	123	4.88646e-07	1.30204	up
EVM0009906	WBGene00219316	F21A3.11	2.88696	155	2.40369	117	2.74949	141	0.431546	26	0.797323	40	1.13713	58	4.41282e-07	1.51884	up
EVM0013925	WBGene00007885	ugt-21	4.74312	244	6.38537	296	5.01196	245	2.64543	149	2.51199	119	2.66034	129	4.38805e-07	1.04754	up
Caenorhabditis_elegans_newGene_696	-	-	2.8834	139	3.36596	146	2.08174	96	6.70396	353	6.8896	304	6.21006	281	4.34575e-07	-1.06502	down
EVM0007875	WBGene00000903	daf-7	5.45923	132	5.49717	120	5.45503	126	1.73582	46	0.971314	22	2.17203	50	4.16843e-07	1.50724	up
EVM0001228	WBGene00007598	C15A11.4	3.7717	134	4.31307	138	5.54119	187	10.0743	391	9.25286	301	11.2324	374	3.8686e-07	-1.00279	down
EVM0011976	-	-	3.12548	90	3.42812	89	2.28505	63	0.40756	13	0.885352	24	0.421611	12	2.66812e-07	1.78085	up
EVM0006738	WBGene00017861	F27D9.2	3.9095	135	4.08553	128	4.44453	147	9.27574	351	11.4006	362	7.97928	259	2.64517e-07	-1.03012	down
EVM0013267	-	-	7.65478	259	8.65712	264	8.97344	288	4.31055	160	4.60021	143	3.75049	119	2.50953e-07	1.01369	up
EVM0004855	WBGene00007857	C31H5.6	3.00855	102	2.00018	61	1.70208	55	7.22446	267	7.40416	230	5.55377	176	2.13319e-07	-1.31482	down
EVM0011121	WBGene00000392	cdd-2	4.92692	65	3.15965	38	2.83989	36	13.6959	197	11.0672	133	13.3575	165	1.6659e-07	-1.44885	down
EVM0016028	-	-	3.76777	221	3.49346	185	3.88317	217	1.57566	101	1.85559	100	1.02547	57	1.52278e-07	1.26468	up
EVM0009741	WBGene00001133	eat-2	2.97348	112	1.47587	50	1.9938	71	6.58974	270	6.19036	213	6.4593	227	1.42706e-07	-1.31202	down
EVM0002775	WBGene00004013	pha-4	1.93936	66	1.1319	35	2.78417	90	6.8148	252	5.77411	179	7.07204	224	1.39285e-07	-1.42092	down
EVM0001821	WBGene00008499	cyp-37A1	3.6971	180	3.98309	175	3.86582	180	1.03199	56	1.88059	85	1.33214	61	1.10174e-07	1.34983	up
EVM0004403	-	-	31.6186	567	27.1266	439	21.9417	375	16.0516	316	13.2054	218	9.57219	162	1.04261e-07	1.06117	up
EVM0012206	WBGene00002016	hsp-16.2	7.44312	113	7.0792	97	7.75395	112	1.89921	32	2.62124	37	1.34288	20	9.98359e-08	1.62113	up
EVM0011663	-	-	3.8453	120	3.8588	109	1.87263	56	0.762674	27	0.614732	18	0.464195	14	9.07297e-08	1.81168	up
Caenorhabditis_elegans_newGene_2558	-	-	6.28702	115	6.03186	99	6.69039	116	1.68302	34	2.24356	38	1.23535	22	9.00372e-08	1.60079	up
EVM0005836	WBGene00015055	pitr-3	1.66754	113	1.3528	83	1.07344	69	0.315616	24	0.265753	17	0.303996	20	8.38827e-08	1.74722	up
EVM0007756	WBGene00007455	ugt-22	1.11031	63	1.24217	64	0.795777	43	5.73055	354	3.97675	206	2.40705	128	7.02698e-08	-1.54915	down
EVM0003176	WBGene00015591	cyk-7	7.44893	279	8.18994	277	8.31945	297	2.83739	117	4.24619	147	4.04083	143	5.75179e-08	1.1086	up
EVM0007246	WBGene00020847	cgr-1	3.00907	139	3.49721	146	2.02081	89	0.393033	20	0.876251	38	0.762145	34	5.56477e-08	1.70796	up
EVM0004291	-	-	4.38632	61	7.42834	93	8.93573	119	1.01397	16	0.653975	9	1.81208	24	5.32806e-08	1.89242	up
EVM0014339	WBGene00001549	gcy-25	2.7739	266	2.47512	214	2.62223	239	0.798344	84	1.33587	118	1.17776	106	5.19911e-08	1.22326	up
EVM0013845	-	-	0.826707	23	0.898865	23	0.764347	21	3.74678	114	3.42718	87	4.64503	121	5.19911e-08	-1.69843	down
Caenorhabditis_elegans_newGene_556	-	-	7.97471	82	12.58	116	12.0338	118	3.01753	34	2.16111	21	2.68674	26	4.53146e-08	1.69953	up
EVM0007638	-	-	6.27747	299	5.34083	229	7.226	327	2.81914	147	2.4638	108	3.29731	148	4.16706e-08	1.1288	up
EVM0006455	WBGene00012857	pbo-5	3.24325	153	3.6928	157	2.61874	118	6.97066	359	7.90308	341	7.51711	332	3.88039e-08	-1.05741	down
EVM0015898	WBGene00011756	ctg-2	20.6993	792	23.2293	801	27.4388	999	4.54943	191	3.87531	137	8.5094	306	3.8297e-08	1.72501	up
EVM0002618	WBGene00044058	F17B5.6	4.58178	244	4.77025	229	4.85205	246	2.07572	122	2.44651	120	1.95199	98	3.77705e-08	1.12883	up
EVM0007993	WBGene00022631	nekl-2	3.43573	122	3.47963	111	3.24287	110	1.00148	39	1.03658	34	0.477481	16	3.19943e-08	1.69472	up
EVM0017554	WBGene00011681	T10B10.4	5.38932	65	7.62382	83	7.16536	82	17.6259	232	19.4643	215	20.303	229	2.80004e-08	-1.27852	down
EVM0006099	-	-	4.67175	32	4.07263	26	5.32313	35	0	0	0	0	0	0	2.6673e-08	2.17633	up
EVM0003042	WBGene00020807	T25F10.4	3.38798	122	2.97247	97	3.25245	112	0.951683	38	0.470206	16	0.884147	30	2.44117e-08	1.71491	up
EVM0017200	-	-	13.873	99	11.6923	75	15.4119	105	40.7946	317	37.5948	245	32.3054	216	1.94084e-08	-1.22346	down
EVM0009636	WBGene00000522	clc-1	2.50514	83	3.19499	96	5.4216	171	0.726053	27	0.997518	31	0.429012	14	1.80721e-08	1.85309	up
EVM0006209	WBGene00018925	F56A11.5	3.80269	106	3.6759	92	3.79868	101	0.812023	25	0.863918	22	0.115675	4	1.37339e-08	1.96131	up
EVM0001925	WBGene00007104	B0024.15	6.7014	364	5.18417	254	6.47888	335	3.29006	196	2.02181	101	1.61419	83	1.26421e-08	1.33557	up
EVM0003915	WBGene00000139	amx-3	7.10061	330	5.03313	211	7.07764	313	2.51647	128	2.58582	111	3.17836	139	1.19903e-08	1.1996	up
EVM0001429	WBGene00011404	T03F7.7	17.7723	645	20.3813	667	13.3056	460	6.92251	275	8.81356	294	10.0617	343	1.11579e-08	1.02973	up
EVM0001605	-	-	5.60687	326	5.07993	267	7.15792	396	2.49257	159	3.2351	173	2.26717	124	9.1099e-09	1.15974	up
EVM0013159	WBGene00018146	F37C4.6	4.37727	229	3.77845	179	4.05873	203	1.02765	59	0.563542	28	1.77165	87	8.71705e-09	1.63547	up
EVM0015376	WBGene00015206	B0495.7	0.395684	34	0.467035	36	0.584264	47	2.10299	193	1.84038	142	1.66595	131	8.51767e-09	-1.57651	down
EVM0003423	WBGene00008064	C41G7.7	5.73208	68	6.28665	68	7.55429	86	18.849	245	28.6486	312	16.4869	184	8.27937e-09	-1.4234	down
EVM0006906	WBGene00012776	Y42A5A.1	2.01934	180	2.57892	207	2.58648	219	5.21248	507	6.40894	522	4.70082	392	5.58294e-09	-1.02873	down
EVM0004230	WBGene00015647	C09F5.1	4.44971	312	2.71596	172	3.68849	246	1.46871	113	0.979557	64	1.38571	92	5.23914e-09	1.40725	up
EVM0000464	WBGene00004236	ptr-22	1.62745	176	2.32734	227	1.69662	175	5.06058	600	3.90449	388	4.4327	451	5.19383e-09	-1.08811	down
EVM0003871	-	-	4.23301	85	5.0807	92	7.41855	142	0.593174	13	1.54197	29	0.809782	16	4.79948e-09	1.94545	up
EVM0001389	WBGene00010789	sulp-5	3.20276	213	2.41525	145	3.35746	212	5.89887	429	7.30125	445	7.54257	470	4.4065e-09	-1.05092	down
EVM0016955	WBGene00022181	pho-9	4.38267	236	4.27205	207	4.27078	219	0.544062	33	0.703845	35	1.87165	95	4.24371e-09	1.75041	up
EVM0017520	WBGene00007455	ugt-22	1.5385	79	1.81959	84	1.23131	60	4.96755	277	5.50634	258	3.91758	188	4.18579e-09	-1.39047	down
Caenorhabditis_elegans_newGene_57	-	-	15.5275	478	14.9719	415	11.7057	343	6.61394	223	8.01949	227	5.82055	168	4.12863e-09	1.07194	up
EVM0015746	WBGene00021975	Y58A7A.1	4.1762	243	5.0954	267	5.03095	279	2.01374	129	2.02173	108	2.25223	123	4.00479e-09	1.18276	up
EVM0011452	WBGene00018579	acs-16	9.23146	551	8.19054	441	8.51812	484	2.34069	153	4.54574	249	4.48991	252	3.23051e-09	1.19429	up
EVM0005115	WBGene00003602	nhr-3	7.07309	300	5.99008	229	4.13693	167	31.4354	1459	25.6211	998	18.1567	723	3.23051e-09	-1.70361	down
EVM0016872	WBGene00010722	K09E4.4	3.80137	249	3.95257	234	5.26142	328	1.66115	120	2.03462	123	1.72788	107	3.14111e-09	1.24142	up
EVM0011099	WBGene00021002	W03F9.4	0.376055	33	0.515105	41	0.431936	36	2.31403	222	1.55089	125	1.66659	137	3.07383e-09	-1.66693	down
EVM0002987	-	-	15.3569	457	12.4101	333	10.5092	298	6.41932	210	5.55724	152	5.32079	149	2.59482e-09	1.15086	up
EVM0016549	WBGene00004798	sip-1	6.88429	195	6.2106	158	5.96207	160	1.61147	50	2.69389	70	1.47569	40	2.53235e-09	1.56928	up
EVM0002993	WBGene00023500	C11H1.9	5.4512	230	5.3375	203	3.75649	151	9.95018	460	11.6955	453	14.1642	561	2.30429e-09	-1.12993	down
EVM0003510	WBGene00015050	clec-51	9.3299	266	8.58177	221	8.74134	237	4.1417	130	3.56193	94	2.82857	76	1.98617e-09	1.29839	up
Caenorhabditis_elegans_newGene_993	-	-	4.80739	208	4.52144	177	2.78303	115	1.16222	56	1.1213	45	1.13981	47	1.90125e-09	1.62721	up
EVM0008547	WBGene00010242	F58D5.2	4.15628	226	4.07348	200	4.17728	216	1.58053	94	1.7681	89	1.61536	83	1.66604e-09	1.29116	up
EVM0009190	WBGene00011401	T03F6.6	26.7207	434	26.1248	382	36.5977	565	13.1905	235	15.7387	235	15.2417	233	1.48152e-09	1.04809	up
Caenorhabditis_elegans_newGene_2433	-	-	29.0216	263	25.7717	211	22.1971	192	66.8864	664	58.7408	489	49.8375	424	1.45425e-09	-1.03997	down
EVM0011169	WBGene00009042	F22B5.4	3.16803	115	2.24695	74	2.33921	81	0.366277	15	0.419629	14	0.537739	19	1.12472e-09	1.99275	up
EVM0002978	WBGene00011222	R10H10.3	12.8309	505	9.27864	330	11.0439	414	3.54504	153	6.2009	224	4.44325	165	1.01259e-09	1.22611	up
EVM0007769	WBGene00001065	dpy-3	3.43669	94	2.82551	70	4.20525	109	0.416914	13	0.278891	7	0.802587	21	9.0778e-10	2.08638	up
EVM0010810	WBGene00010403	otpl-8	2.58025	168	1.45022	85	2.89363	179	6.0113	427	6.75392	403	6.81983	416	9.07584e-10	-1.29268	down
EVM0004435	WBGene00008335	C55A6.6	5.91642	160	7.83307	191	7.48608	192	2.596	77	2.33424	58	1.9586	50	9.03189e-10	1.51089	up
EVM0014477	WBGene00013497	hex-5	0.660711	38	0.311561	17	0.495083	27	2.64621	166	2.13367	112	2.6652	143	8.48905e-10	-1.82336	down
EVM0012120	WBGene00015057	gad-3	1.7782	230	1.53411	179	1.83278	226	0.549907	78	0.690938	83	0.674306	82	7.11845e-10	1.37625	up
EVM0013395	WBGene00006678	twk-25	9.46829	495	8.47438	400	7.40928	369	4.05257	232	3.84215	185	4.63903	228	6.70583e-10	1.05066	up
EVM0016652	WBGene00001534	gcy-7	3.57736	369	2.4813	231	4.25551	418	1.39034	157	1.50055	142	1.00534	98	5.62826e-10	1.36178	up
EVM0002470	WBGene00002017	hsp-16.11	24.5067	511	24.5005	460	22.3358	443	12.8953	295	12.1719	233	7.90561	155	5.62061e-10	1.13	up
EVM0009258	WBGene00005174	srg-17	3.17755	274	3.12007	243	3.49384	287	1.01488	96	1.36895	109	0.46145	38	5.19991e-10	1.62384	up
EVM0013187	WBGene00004234	ptr-20	5.54807	442	4.68108	336	4.55736	346	2.11616	185	2.70574	198	2.21589	166	5.18793e-10	1.1002	up
EVM0005403	WBGene00013477	Y69E1A.5	114.236	2175	123.634	2123	92.2863	1673	30.2668	632	14.029	246	24.9907	447	3.98284e-10	1.89527	up
EVM0003626	WBGene00023408	cex-2	1.40798	26	2.06891	34	1.99491	35	8.27797	163	7.41155	123	9.50784	161	3.97888e-10	-1.75897	down
EVM0001857	WBGene00007358	lact-6	1.34697	50	1.15431	39	2.07463	73	0	0	0	0	0.135692	5	2.82602e-10	2.42434	up
EVM0001952	WBGene00010899	M28.8	5.51519	452	5.47293	404	6.66094	519	3.05141	274	2.51673	190	3.11177	240	1.40286e-10	1.05528	up
EVM0015243	-	-	1.85322	31	3.57525	53	2.28602	36	0	0	0	0	0	0	1.32945e-10	2.4862	up
EVM0000276	WBGene00008799	F14E5.1	5.36692	239	4.70812	189	4.30664	183	1.89743	93	1.20573	50	1.33523	56	1.28343e-10	1.57039	up
EVM0013338	WBGene00022801	pcp-5	8.29023	414	9.45493	426	9.85819	468	4.81677	264	4.18975	192	2.92748	138	9.35406e-11	1.21283	up
EVM0004732	WBGene00000541	cln-3.3	1.76681	156	2.35271	187	2.68637	226	5.72166	553	5.92626	480	5.17216	429	6.81439e-11	-1.14884	down
EVM0002849	WBGene00015753	C14B9.3	4.73086	176	4.84103	162	3.01363	107	0.793914	33	1.20099	41	0.849834	30	6.36581e-11	1.86331	up
EVM0002751	WBGene00001603	gln-2	3.39204	139	2.66509	99	1.38236	54	0.31958	15	0.318357	12	0.103986	4	4.86014e-11	2.31868	up
Caenorhabditis_elegans_newGene_1140	-	-	3.53858	193	4.09317	201	3.43252	178	0.957748	57	1.31272	66	1.20341	62	4.44792e-11	1.57331	up
EVM0017446	-	-	3.52402	175	3.2432	146	2.9695	141	0.67953	37	1.0717	49	0.780449	37	4.06147e-11	1.75473	up
EVM0007942	WBGene00019268	H41C03.1	7.3214	280	6.16673	213	6.28977	229	2.40255	101	2.34495	83	1.24778	45	3.75241e-11	1.6027	up
EVM0011706	WBGene00010593	gsnl-1	7.10547	416	7.73038	408	6.29765	351	3.24647	208	3.10389	167	3.53257	194	3.7208e-11	1.12699	up
EVM0004082	WBGene00012814	Y43F8B.3	0.468092	62	0.608208	73	0.884312	112	2.05185	298	2.14071	260	3.01481	375	3.46343e-11	-1.58983	down
EVM0011346	WBGene00019846	gpx-7	26.8167	626	23.3298	491	22.709	505	13.0858	335	8.85239	190	12.1114	266	3.18251e-11	1.12219	up
EVM0000725	WBGene00011821	cdf-2	12.7157	442	16.9932	532	14.3396	474	6.99049	266	6.17256	197	7.61769	249	3.01358e-11	1.11372	up
EVM0008192	WBGene00012253	clec-50	14.3912	779	10.9583	535	12.8454	662	6.02129	358	7.1407	355	4.09451	209	2.84238e-11	1.1681	up
EVM0005841	WBGene00009386	tag-290	24.9313	497	25.5565	460	27.6768	525	14.2062	311	14.0246	257	11.2479	211	2.42772e-11	1.02797	up
EVM0007095	-	-	6.528	288	5.75147	229	6.59144	277	2.58074	125	2.48064	101	2.35591	98	1.78062e-11	1.33042	up
EVM0005592	WBGene00021893	ndnf-1	19.9591	1087	15.5594	764	19.4635	1009	6.78338	405	10.1688	509	10.7262	549	1.70803e-11	1.03845	up
EVM0011968	-	-	20.1593	374	20.8074	348	16.5584	292	8.89858	181	7.19262	123	7.59199	132	1.5354e-11	1.27787	up
EVM0014248	-	-	12.8395	527	13.866	513	14.5125	567	7.6407	344	7.04379	266	5.51779	213	1.15328e-11	1.0661	up
EVM0003113	WBGene00007680	maa-1	30.4518	797	23.9349	565	28.4618	709	15.4074	442	9.44639	227	12.8856	317	1.09478e-11	1.15577	up
EVM0002791	WBGene00020149	T01D1.4	30.2382	623	22.8124	424	23.1585	455	7.97064	180	13.6966	260	8.27064	161	1.05178e-11	1.34047	up
EVM0008849	WBGene00006608	tre-2	5.38818	438	4.92524	361	4.7282	366	1.21837	109	1.88092	141	2.41066	184	9.59102e-12	1.42	up
EVM0002282	WBGene00008254	C51E3.9	1.33343	47	1.72119	55	1.38389	47	5.50037	211	6.20992	200	5.77386	190	7.09655e-12	-1.66065	down
EVM0003291	WBGene00021818	Y53G8B.2	4.4757	229	5.09296	235	5.91101	288	2.06134	116	1.19574	57	1.25429	61	5.90818e-12	1.64536	up
EVM0008743	WBGene00011003	R04B5.5	1.97382	78	1.9263	69	2.45189	93	0	0	0.214706	8	0.213041	8	4.93277e-12	2.51001	up
EVM0016031	WBGene00009577	F40F8.4	19.9405	420	22.1384	420	18.6945	375	9.48852	219	8.95793	174	9.76534	193	4.75777e-12	1.13787	up
EVM0001751	WBGene00021814	mfsd-8	8.09352	563	7.76208	487	7.81402	518	3.22869	246	3.25993	209	4.56809	299	4.60853e-12	1.1317	up
EVM0001540	WBGene00003968	peb-1	3.90506	308	3.26437	232	3.96185	297	8.55421	738	7.36459	533	9.01117	667	3.95186e-12	-1.0318	down
EVM0012212	-	-	2.27901	185	1.36033	100	2.12806	164	0.282716	26	0.160153	12	0.466026	36	3.0631e-12	2.15785	up
EVM0008262	WBGene00008220	C50B6.7	5.99754	308	6.24818	290	6.33403	310	2.48472	140	2.56776	121	2.66374	129	2.93373e-12	1.27644	up
EVM0010159	WBGene00008091	C44F1.1	2.53754	266	2.36685	224	2.20939	220	5.63216	646	4.91747	473	5.7756	568	2.7093e-12	-1.06249	down
EVM0002853	-	-	14.4723	136	19.8858	169	13.9644	125	3.23808	34	3.85142	34	1.89203	17	2.6424e-12	2.04556	up
EVM0016925	WBGene00001603	gln-2	10.7078	641	7.90697	427	7.25839	414	3.14547	207	3.24651	179	4.2271	238	2.58284e-12	1.29015	up
EVM0005705	WBGene00008040	ttr-5	40.3001	821	31.7583	583	31.9001	619	15.7895	353	20.1898	378	13.926	267	2.58284e-12	1.1003	up
EVM0016979	WBGene00023408	cex-2	4.33054	88	4.4012	81	3.53227	68	14.1802	314	13.0399	242	13.2802	252	2.2125e-12	-1.48985	down
EVM0003591	WBGene00022014	Y61A9LA.1	7.38511	463	11.6134	656	11.5214	687	3.52482	242	3.86351	223	4.99717	294	1.96822e-12	1.30514	up
EVM0014129	-	-	0	0	0	0	0.12954	4	2.12274	66	3.69348	95	1.82373	48	8.86722e-13	-2.69813	down
EVM0008592	WBGene00015116	paic-1	12.3979	543	11.5496	456	8.44534	352	0.562306	27	0.764954	31	0.132956	6	7.35718e-13	2.67109	up
EVM0001125	WBGene00003710	nhr-120	5.12821	230	5.31149	214	4.97284	212	12.8578	630	13.9786	574	10.5689	444	6.61855e-13	-1.13385	down
EVM0012783	WBGene00008375	D1054.8	1.97112	56	2.65422	67	3.16647	85	8.99007	275	10.3057	265	9.47266	249	6.50824e-13	-1.61431	down
EVM0013274	-	-	1.19112	40	1.64526	50	1.51799	49	6.14301	225	8.0688	248	5.40835	170	6.466e-13	-1.81148	down
EVM0000299	WBGene00011662	T09F3.2	9.81239	656	6.88877	416	7.59832	484	3.3638	247	4.00317	246	3.28782	207	4.72393e-13	1.21607	up
EVM0003231	WBGene00011694	T10G3.3	9.4756	370	8.78683	310	7.34634	273	20.5136	877	17.2899	620	20.7504	761	3.59162e-13	-1.06081	down
EVM0006612	WBGene00004234	ptr-20	7.65878	571	6.29104	423	7.51322	533	2.9997	245	2.88891	198	3.78936	266	3.47691e-13	1.17978	up
EVM0006827	WBGene00008560	pho-13	3.51297	209	3.71622	199	4.80971	272	1.11759	73	0.275328	15	0.375904	21	3.1702e-13	2.2449	up
EVM0006587	-	-	10.0439	205	18.6021	341	14.1924	275	3.02364	68	4.30799	81	4.19049	80	3.1702e-13	1.76185	up
EVM0014925	WBGene00018375	F43C9.1	7.6018	305	7.49665	271	8.59889	328	2.98305	131	3.22742	119	2.15759	82	2.86927e-13	1.46925	up
EVM0002459	WBGene00018522	F46H5.7	26.056	480	25.7866	429	27.9574	491	13.6618	276	12.2074	207	12.0002	208	2.17253e-13	1.11488	up
EVM0002972	WBGene00018925	F56A11.5	29.9271	1025	25.329	782	22.5194	734	11.4554	430	15.3346	483	12.2435	394	2.03658e-13	1.04896	up
EVM0014822	WBGene00016657	C44E12.1	20.3689	789	17.4446	609	13.6679	504	8.02675	341	5.74036	205	7.51693	274	1.64539e-13	1.28443	up
EVM0008143	-	-	15.1257	494	19.8123	584	26.2346	816	2.78653	100	1.62733	49	3.55696	110	1.60805e-13	2.34239	up
EVM0004393	WBGene00008032	C39E9.8	14.8178	431	16.9183	444	16.1417	447	7.23139	231	6.34279	170	7.74531	212	1.57025e-13	1.19418	up
EVM0003938	-	-	8.21348	93	14.6355	148	15.8182	169	1.43325	18	2.46719	26	0.8497	9	1.42177e-13	2.36902	up
EVM0002518	WBGene00008436	DH11.2	3.37017	129	3.03871	105	3.82633	139	0.595972	25	0.370886	13	0.073103	3	1.12123e-13	2.46604	up
EVM0013548	WBGene00001602	gln-1	14.405	1018	16.6472	1060	14.5518	979	8.22654	637	8.37222	544	5.39301	358	1.05835e-13	1.09762	up
EVM0000369	WBGene00022498	hsd-2	8.22124	322	10.6947	377	8.77936	327	18.7971	805	22.869	821	20.6534	759	9.96695e-14	-1.03997	down
EVM0005520	WBGene00013008	clec-146	19.4106	493	15.2328	349	14.8607	360	3.84359	107	5.66041	133	7.02883	168	9.63239e-14	1.542	up
EVM0014795	WBGene00017909	F28H1.4	33.6552	665	31.2958	558	28.5603	537	15.3075	332	15.5463	282	16.5176	307	9.4715e-14	1.03478	up
EVM0012459	WBGene00012439	Y12A6A.1	41.347	766	40.0125	668	39.798	702	16.8381	342	20.8821	356	23.548	410	8.35224e-14	1.03907	up
Caenorhabditis_elegans_newGene_1725	-	-	4.28461	171	5.86168	211	4.76031	181	1.2908	57	1.0595	39	1.27471	48	7.37691e-14	1.86147	up
EVM0000125	WBGene00015777	sfxn-2	12.8137	393	10.5798	293	13.9032	406	23.7445	798	32.0669	904	31.8593	918	5.60883e-14	-1.09668	down
EVM0010803	WBGene00010197	F57C2.5	13.8468	660	11.4219	491	14.7637	670	6.93467	362	4.8607	213	5.50288	247	5.243e-14	1.23198	up
EVM0010195	WBGene00017838	F26G1.2	39.4825	520	41.064	488	35.429	445	12.8477	186	11.2752	137	19.0717	236	3.83569e-14	1.4166	up
EVM0007444	WBGene00004221	ptr-6	5.64392	524	6.71151	561	5.6357	498	2.99508	305	2.69698	230	2.3621	206	3.4011e-14	1.19123	up
EVM0016096	-	-	31.3073	490	32.3027	456	25.1936	375	76.2839	1306	63.7627	916	59.8431	879	3.39913e-14	-1.0439	down
EVM0002982	WBGene00012085	T27D12.1	29.9933	1443	28.7877	1249	26.3485	1207	1.60483	85	1.25684	56	3.70481	168	3.15288e-14	2.63817	up
EVM0016014	WBGene00007565	clec-48	23.9771	727	33.9711	929	36.3894	1050	16.0476	533	14.0091	390	13.6063	388	3.05262e-14	1.15008	up
EVM0017097	WBGene00000964	dhp-2	4.60645	246	4.37441	211	4.45255	226	12.0836	706	10.8461	531	9.891	495	1.99973e-14	-1.14889	down
EVM0009203	-	-	14.716	362	18.3204	406	13.5812	318	6.07854	164	4.89647	111	5.5581	129	1.28476e-14	1.4725	up
EVM0013074	WBGene00000008	aat-7	15.8716	753	13.4056	574	17.21	777	0.792158	42	1.34791	59	2.35295	105	9.93164e-15	2.56444	up
EVM0006445	WBGene00018485	F46C8.3	18.6373	325	24.5308	386	19.2781	320	43.8306	836	52.4191	839	49.3946	808	8.35335e-15	-1.08843	down
EVM0005671	WBGene00019515	ugt-19	3.84324	193	2.59483	118	3.60993	173	11.451	629	9.21555	424	9.56917	451	7.30024e-15	-1.406	down
EVM0002754	WBGene00000966	dhs-2	3.56861	161	3.67454	150	4.00572	172	0.474568	24	0.914078	38	0.735724	32	6.44399e-15	2.11189	up
EVM0009624	WBGene00008304	C54D10.10	15.8153	280	13.9015	222	19.7879	334	1.46678	29	5.03103	82	2.56486	43	5.8405e-15	2.15022	up
EVM0015668	-	-	7.25178	277	6.95634	240	9.4861	345	21.0934	882	17.3611	609	24.6824	885	5.39616e-15	-1.26232	down
EVM0009699	WBGene00012583	clec-4	27.6094	1152	32.7865	1233	33.849	1344	12.9364	591	18.1145	694	17.787	697	4.55834e-15	1.01189	up
EVM0011608	-	-	24.2719	389	27.7124	400	21.1327	322	9.84199	173	8.37485	124	8.21055	124	4.40019e-15	1.45272	up
EVM0000094	WBGene00006688	twk-36	12.4523	637	13.6822	631	13.1649	641	0.207909	12	0.99627	47	0.601712	29	4.07516e-15	2.85009	up
EVM0006170	-	-	6.47896	151	5.46932	115	4.97042	110	16.7633	426	16.7195	356	18.1607	396	4.07516e-15	-1.42163	down
EVM0004826	WBGene00012529	Y32F6A.4	20.4569	1292	12.8827	734	16.3805	985	50.6333	3503	52.9462	3072	58.0957	3446	2.93927e-15	-1.50345	down
EVM0000916	WBGene00020149	T01D1.4	29.7189	637	28.2859	547	29.1198	595	14.8212	348	14.4221	284	11.3036	228	2.8251e-15	1.1478	up
EVM0007577	WBGene00001564	icl-1	5.0071	469	5.13241	433	8.22616	733	1.92162	197	1.09006	94	2.12661	187	2.59469e-15	1.74334	up
EVM0001118	-	-	3.31519	236	2.52576	162	2.8616	194	0.562338	44	0.587109	39	0.795217	54	1.95871e-15	1.96705	up
EVM0004715	WBGene00019645	swt-7	15.569	515	13.8742	414	14.2984	451	6.68228	243	6.44778	196	6.07898	189	1.64236e-15	1.22167	up
EVM0011059	WBGene00010985	R03A10.5	21.395	829	20.3969	713	19.8565	732	9.47136	402	8.92581	318	11.813	430	1.48551e-15	1.08254	up
EVM0015488	WBGene00020929	W02C12.2	5.6069	237	4.90858	187	4.36227	176	13.7991	638	13.908	539	12.0011	476	1.38714e-15	-1.26235	down
EVM0012715	WBGene00021943	Y55F3BR.6	24.7283	881	20.762	667	21.4418	727	11.0115	430	12.5074	410	10.2148	342	1.23192e-15	1.04651	up
EVM0014338	WBGene00015464	C05C8.7	1.45423	93	1.43248	82	1.49595	91	5.40051	375	6.51178	379	4.48409	267	2.84408e-16	-1.6623	down
EVM0012321	WBGene00013895	ZC434.9	12.075	864	10.3384	667	11.8707	808	5.27316	413	6.43396	423	5.78453	389	2.77361e-16	1.03352	up
EVM0001781	WBGene00011725	lips-5	21.7469	615	21.8785	558	21.6227	583	7.81739	243	11.2665	293	9.58974	255	2.72651e-16	1.2285	up
Caenorhabditis_elegans_newGene_819	-	-	4.39886	441	4.80101	399	6.59513	628	14.8499	1558	11.877	1050	13.3308	1241	2.27757e-16	-1.19795	down
EVM0006224	WBGene00016443	C35D10.6	10.4816	280	10.9765	265	7.1854	183	2.19992	65	2.0609	51	2.4716	62	2.11304e-16	1.93799	up
EVM0008755	WBGene00010661	tyr-2	10.0785	770	11.5934	799	11.0166	802	5.95302	499	5.28753	371	4.60179	331	1.97843e-16	1.09612	up
EVM0006983	-	-	20.683	515	21.1713	475	38.2127	905	7.85537	214	6.58346	151	9.16379	215	1.23927e-16	1.69961	up
EVM0004595	WBGene00009980	F53F1.2	1.68488	54	0.516686	15	1.40079	43	9.12307	319	7.88996	231	7.55259	226	1.15229e-16	-2.25512	down
EVM0007679	WBGene00012251	clec-49	16.8417	660	18.7883	664	16.0933	600	8.56992	368	6.1318	221	6.05473	223	7.99594e-17	1.33622	up
EVM0001986	WBGene00019060	acox-3	9.68573	624	7.54833	439	10.5114	645	3.38507	239	3.54015	210	4.16389	252	6.5674e-17	1.34683	up
EVM0007361	WBGene00000008	aat-7	19.4233	935	19.5726	850	21.966	1007	1.74366	92	1.77799	79	3.73229	169	4.51597e-17	2.53208	up
EVM0013111	WBGene00043982	B0403.6	15.1923	609	13.3157	481	13.5187	516	5.41444	238	5.87351	216	6.64085	250	2.06037e-17	1.26839	up
EVM0006091	WBGene00002138	inx-16	13.8706	770	16.0351	802	15.9478	842	5.75356	350	7.935	405	7.44488	388	1.51254e-17	1.17006	up
EVM0010924	WBGene00003860	oig-2	24.3861	412	21.3942	326	18.0263	290	6.44675	120	6.09946	95	7.17859	114	1.13939e-17	1.65566	up
EVM0002752	WBGene00008335	C55A6.6	24.8162	671	27.1418	662	28.3053	728	13.1415	389	13.6031	338	11.5507	294	1.13671e-17	1.12109	up
EVM0002304	WBGene00019204	H14N18.4	9.74752	759	8.8833	624	10.2412	759	4.14669	354	4.72853	339	4.99076	365	8.22469e-18	1.1147	up
EVM0014003	WBGene00008548	F07A11.5	24.1858	755	25.0258	704	25.3072	752	12.9334	442	12.5519	360	12.6724	372	6.23142e-18	1.02804	up
EVM0000231	WBGene00012531	Y32F6B.1	6.94674	496	8.19451	527	9.71421	660	2.89605	227	3.62016	238	2.94086	197	4.71262e-18	1.4121	up
EVM0002519	WBGene00022500	lfi-1	0.477207	101	0.27942	54	0.250496	51	0	0	0	0	0	0	4.6054e-18	3.22811	up
EVM0016452	WBGene00006603	tps-2	17.8288	794	14.8626	597	21.6643	918	6.49946	317	7.93372	325	8.13159	340	4.58135e-18	1.30426	up
EVM0016707	WBGene00021818	Y53G8B.2	9.35891	443	10.0348	429	11.9487	539	3.79908	197	4.32468	188	3.20279	143	2.71698e-18	1.47697	up
EVM0010753	WBGene00000370	ccg-1	28.5468	1019	31.2652	1006	29.8191	1013	12.6113	493	13.0328	428	17.1469	575	2.60625e-18	1.12301	up
EVM0009956	WBGene00007071	AC3.5	15.465	1573	12.2211	1121	13.7371	1331	6.07543	677	7.48792	700	7.78116	744	2.5685e-18	1.02361	up
EVM0012317	WBGene00010277	F58G6.7	137.424	1988	135.026	1761	147.774	2035	85.5418	1355	58.1054	772	69.0506	938	2.40823e-18	1.04166	up
EVM0002110	WBGene00003778	nnt-1	5.76078	531	6.4393	535	5.09405	447	1.56866	159	1.31307	111	2.32865	202	2.40823e-18	1.69124	up
EVM0011711	WBGene00000169	aqp-1	15.8931	431	17.3281	424	16.972	438	4.28031	127	7.01422	175	4.86992	124	1.85663e-18	1.62194	up
EVM0008337	WBGene00003982	pes-9	20.6344	937	17.6438	723	21.3071	921	9.69876	483	9.78641	409	10.3914	444	1.22153e-18	1.0566	up
EVM0004484	WBGene00017688	ttr-35	82.698	1105	95.4446	1150	85.1427	1083	47.9881	703	48.4534	595	40.5361	509	7.9818e-19	1.00828	up
EVM0014560	WBGene00002017	hsp-16.11	15.6417	227	18.242	238	21.8362	301	3.17526	51	4.72288	63	1.96704	27	6.36264e-19	2.24762	up
EVM0001970	WBGene00303024	H40L08.7	331.518	5374	340.608	4979	265.727	4101	96.4598	1713	132.909	1979	108.073	1646	3.19357e-19	1.48952	up
EVM0005179	WBGene00009042	F22B5.4	30.9963	599	25.4928	444	32.1161	591	10.606	225	12.954	230	9.4796	172	2.84424e-19	1.44299	up
EVM0002476	-	-	11.3177	411	8.59706	282	10.795	373	2.93677	117	3.47694	116	2.71374	93	2.18474e-19	1.71524	up
EVM0002458	WBGene00004236	ptr-22	8.55376	926	6.68547	653	7.4015	763	17.1076	2029	17.8403	1774	14.3168	1456	1.64622e-19	-1.0072	down
EVM0007705	WBGene00008499	cyp-37A1	11.6841	575	13.7212	609	13.698	642	5.8304	315	4.60618	209	4.10658	190	1.48186e-19	1.43968	up
EVM0017077	WBGene00000799	crn-6	2.485	102	3.18915	119	4.02156	158	12.0994	545	10.9329	413	14.4487	557	1.08555e-19	-1.73083	down
EVM0002101	WBGene00007395	dcar-1	6.26491	219	7.44067	235	6.51403	217	1.38972	54	0.988083	32	1.47188	49	4.4093e-20	2.18374	up
EVM0011407	WBGene00016116	C25H3.7	26.614	1318	24.4169	1090	26.5126	1250	10.878	590	13.6712	622	14.5141	675	2.37541e-20	1.05739	up
EVM0002718	WBGene00020827	T26A8.4	14.6682	1103	14.2247	965	17.6955	1267	8.25845	680	7.3573	508	7.32915	518	2.36999e-20	1.08293	up
EVM0004925	WBGene00000985	dhs-22	37.16	1065	30.2161	781	31.6247	863	15.6571	492	16.7149	440	14.6457	394	2.11746e-20	1.13427	up
EVM0016880	WBGene00014106	ZK856.5	4.77921	210	3.83629	152	4.75084	199	12.7473	613	13.7686	555	12.9753	535	1.54231e-20	-1.40702	down
EVM0003337	-	-	29.8365	413	33.157	414	37.0439	488	10.1504	154	9.40556	120	12.5179	163	1.10378e-20	1.63021	up
EVM0015122	WBGene00044605	ttr-36	57.1767	738	45.5935	531	52.3398	643	19.4267	275	23.3945	278	18.4602	224	6.72931e-21	1.37468	up
EVM0014915	WBGene00014206	nit-1	4.43037	132	5.29334	142	4.95268	140	0.170266	6	0.515996	15	0.465546	13	3.81241e-21	2.89466	up
EVM0015993	WBGene00019963	R08E5.3	19.6976	874	16.3441	654	21.8345	923	8.551	416	8.53262	348	7.59101	317	2.3691e-21	1.27501	up
EVM0009050	WBGene00011579	T07D4.2	3.5416	139	2.26845	81	1.93591	73	10.8735	467	14.5077	523	11.4741	423	1.26708e-21	-1.97086	down
EVM0014660	WBGene00004981	spl-1	19.0979	971	18.8812	866	22.6208	1095	10.0121	558	8.93848	418	9.82681	470	1.26152e-21	1.13199	up
EVM0015087	-	-	5.34938	103	5.5456	96	6.40727	117	21.8224	458	20.7082	364	22.6018	407	6.58342e-22	-1.71136	down
EVM0013653	WBGene00000978	dhs-15	19.5705	478	23.3379	514	26.7732	623	7.83727	210	8.25479	186	8.11896	187	5.01784e-22	1.53599	up
EVM0015736	-	-	8.24455	395	10.7315	464	11.4582	523	2.27681	120	3.35123	148	1.87685	85	2.91645e-22	1.94705	up
EVM0000507	-	-	13.4126	251	12.0105	203	13.5056	241	35.9822	737	34.4844	593	39.8222	700	2.74622e-22	-1.35974	down
EVM0013258	-	-	42.7245	512	51.1427	553	50.9682	581	18.7651	247	14.7704	163	13.4591	152	1.5067e-22	1.61831	up
EVM0004240	WBGene00008542	scav-6	9.18741	529	10.0438	522	9.74945	535	19.857	1253	21.873	1157	23.1741	1253	9.22306e-23	-1.0491	down
EVM0016503	-	-	17.0517	563	13.6019	405	16.0494	505	35.881	1298	38.9692	1182	34.7737	1078	6.27709e-23	-1.11239	down
EVM0016231	WBGene00000739	col-166	90.6147	2287	98.6952	2246	74.2406	1784	41.7798	1155	44.6356	1035	47.708	1131	5.99826e-23	1.0453	up
Caenorhabditis_elegans_newGene_1732	-	-	2.50067	30	3.21583	35	3.8684	44	27.4428	355	18.3149	199	25.7449	286	4.56886e-23	-2.44381	down
EVM0009019	WBGene00007557	C14A4.6	25.0429	446	22.7323	366	27.6869	470	8.11893	159	7.58336	125	8.12322	136	3.04491e-23	1.6576	up
EVM0014704	WBGene00007480	glna-1	6.67648	331	6.31777	283	6.74365	319	16.2868	885	16.3314	744	17.7565	827	2.72908e-23	-1.22488	down
EVM0004742	WBGene00014017	ZK632.10	156.475	1427	167.87	1381	175.611	1525	87.98	879	64.0067	537	78.2002	670	2.43981e-23	1.17476	up
EVM0010812	WBGene00013923	ghi-1	35.2107	1761	36.398	1642	40.003	1905	17.1129	938	13.1037	602	19.5154	917	2.34231e-23	1.21981	up
EVM0005648	-	-	76.3746	2230	69.7368	1837	65.2272	1813	41.0223	1313	34.4837	925	32.595	894	2.00556e-23	1.03508	up
EVM0003785	WBGene00011738	T12G3.2	22.849	1840	24.9542	1812	19.9387	1528	11.2353	991	12.1747	901	12.1243	917	1.58289e-23	1.00425	up
EVM0000488	WBGene00011056	R06B9.5	8.24358	432	10.9588	518	9.7084	485	2.70193	156	2.11042	102	3.11001	153	1.22201e-23	1.82959	up
EVM0004983	WBGene00008123	ent-4	9.82642	430	8.03111	317	8.68433	362	23.6561	1133	21.1458	849	24.9834	1026	8.37466e-24	-1.2653	down
EVM0015079	WBGene00003837	oat-1	8.54785	417	9.46931	417	8.15245	379	2.66152	143	2.65735	119	2.10773	97	5.2659e-24	1.79085	up
EVM0003629	WBGene00007455	ugt-22	1.57437	80	1.24247	57	1.11435	54	7.51096	414	6.82507	315	6.37634	301	4.82237e-24	-2.09806	down
EVM0015750	WBGene00010421	slc-36.4	1.7825	34	1.33936	23	0.785017	15	14.4593	299	13.8677	241	10.3515	184	4.65336e-24	-2.69978	down
EVM0008802	WBGene00007565	clec-48	14.0365	487	13.2626	415	13.9535	460	3.14922	120	4.9464	158	3.34236	109	4.02281e-24	1.82553	up
EVM0002237	WBGene00012128	nra-1	8.52509	628	6.64423	441	8.36147	586	19.5878	1580	17.7394	1200	21.4051	1480	3.68638e-24	-1.19867	down
EVM0008065	-	-	6.38358	90	6.23484	80	6.52022	88	25.6596	397	27.8487	361	27.9215	370	2.99052e-24	-1.86505	down
EVM0000893	WBGene00000050	acr-11	4.91749	197	4.3746	158	4.44643	170	14.6256	641	14.0383	516	15.1124	568	2.90564e-24	-1.51382	down
EVM0007245	WBGene00013575	acs-5	16.6598	1086	13.8578	815	14.5989	906	4.18922	299	5.15353	309	6.67372	409	2.35681e-24	1.52193	up
EVM0013449	WBGene00014697	cyp-25A3	6.30065	298	8.58372	366	7.84419	353	0.823624	43	1.82503	80	1.17555	53	2.12655e-24	2.37141	up
EVM0017239	WBGene00007480	glna-1	6.49008	514	5.87599	420	4.99042	377	13.9346	1209	14.9151	1085	14.9091	1109	2.03796e-24	-1.2091	down
EVM0004625	WBGene00013875	cest-2.1	3.71247	277	3.85624	260	4.96522	353	0.383314	32	0.284245	20	0.826922	58	6.26156e-25	2.69321	up
EVM0014621	WBGene00018996	F57B9.1	39.9404	1289	41.1164	1197	38.1664	1173	18.4216	652	22.0587	654	17.7684	539	6.25138e-25	1.10252	up
EVM0011459	WBGene00000835	cuc-1	108.641	711	110.395	651	120.055	748	47.9884	344	46.488	280	47.705	293	5.00856e-25	1.30386	up
EVM0013408	WBGene00017764	F25A2.1	33.1979	938	29.2065	744	38.6937	1041	77.8625	2410	71.0792	1845	76.9387	2041	4.64252e-25	-1.05065	down
EVM0015594	WBGene00022014	Y61A9LA.1	9.52109	597	9.85565	557	10.5957	632	3.51298	242	3.95901	228	3.90761	230	3.30851e-25	1.43562	up
EVM0010305	WBGene00044021	R02E4.2	1.97053	64	2.93943	86	2.23676	69	11.5158	407	13.3322	395	11.4561	347	2.80168e-25	-2.07427	down
EVM0004733	WBGene00011890	mics-1	54.5297	1402	49.2203	1141	47.5968	1165	25.3412	714	26.4805	626	25.3059	611	2.76054e-25	1.04398	up
EVM0015237	WBGene00009042	F22B5.4	45.9037	939	49.1721	907	50.3147	980	18.5265	415	19.8901	374	12.1972	235	2.61293e-25	1.546	up
EVM0003615	WBGene00012107	T27F6.8	16.1837	746	18.13	754	14.4453	634	6.46744	327	5.57694	237	5.22288	227	1.19423e-25	1.52068	up
EVM0004817	WBGene00009578	F40F8.5	58.347	2080	47.8119	1537	50.0149	1698	24.1139	942	24.7179	810	28.6176	958	6.61225e-26	1.08187	up
EVM0008163	-	-	38.0245	311	56.5789	417	52.3335	407	11.2542	101	10.4805	79	8.10997	63	4.51173e-26	2.18169	up
EVM0001706	WBGene00004062	pmp-5	20.7043	1158	15.8466	799	23.4268	1247	49.5793	3037	49.7959	2558	45.5998	2395	1.48158e-26	-1.15823	down
EVM0007475	WBGene00009165	gpx-1	54.2056	839	49.9052	697	66.8484	985	19.6934	334	23.2278	331	21.2728	310	1.31598e-26	1.45197	up
EVM0007072	-	-	37.8666	1208	52.0302	1497	72.235	2194	5.85452	205	3.69006	109	5.04497	152	1.20203e-26	2.96498	up
EVM0012480	WBGene00020903	acd-5	6.80321	424	7.473	420	6.25187	371	1.85886	127	1.15796	67	1.08929	64	1.01786e-26	2.19953	up
Caenorhabditis_elegans_newGene_1731	-	-	1.5318	30	3.11563	55	1.07683	20	18.6297	395	17.0805	304	18.1767	331	7.92747e-27	-2.71473	down
EVM0005971	WBGene00003711	nhr-121	4.82646	207	4.66394	180	4.55079	186	18.8376	884	14.102	555	16.6677	670	7.27347e-27	-1.65512	down
EVM0013355	WBGene00022233	ipla-6	12.888	1440	11.1894	1127	11.1161	1182	23.8575	2919	28.0909	2882	34.3059	3599	6.68834e-27	-1.17506	down
EVM0004641	WBGene00016877	C52D10.3	8.0344	268	8.48285	255	9.17271	291	1.08652	40	1.81296	56	1.32986	42	6.63932e-27	2.41778	up
EVM0017161	WBGene00012085	T27D12.1	17.32	1136	16.5307	978	18.2097	1137	7.57386	544	8.91378	537	8.28889	511	4.96896e-27	1.14028	up
EVM0010696	WBGene00003577	ndg-4	3.62736	306	3.65129	278	4.77631	384	10.8404	1001	13.9567	1081	12.2722	972	3.51995e-27	-1.47438	down
EVM0004488	WBGene00012319	ipla-3	7.50498	783	8.3197	783	8.62106	857	3.24782	372	3.05198	293	3.52173	346	2.48372e-27	1.36208	up
EVM0003959	WBGene00012813	Y43F8B.2	37.8835	1739	29.091	1205	41.6553	1821	15.3372	772	16.2329	685	15.0377	649	1.19413e-27	1.27733	up
EVM0008582	WBGene00019203	ttr-47	151.588	2644	135.493	2131	122.677	2037	66.7773	1276	71.9328	1153	54.5361	894	1.18297e-27	1.15171	up
EVM0007189	WBGene00007419	C07E3.9	3.19545	169	2.93187	140	3.57194	180	11.2176	649	11.2136	544	11.3292	562	1.01835e-27	-1.6348	down
EVM0014250	WBGene00017743	F23F1.2	17.2418	1418	16.0185	1188	14.3044	1120	4.58184	413	5.11243	387	7.0807	547	6.11617e-28	1.53758	up
EVM0015509	WBGene00001753	gst-5	95.7048	1840	74.7094	1295	86.8812	1590	39.7776	838	32.551	575	39.1225	707	2.50455e-28	1.26346	up
EVM0017231	-	-	40.5962	397	44.3925	391	39.2865	366	110.87	1186	106.848	959	132.396	1214	2.23123e-28	-1.36344	down
EVM0009170	WBGene00003549	nas-31	8.80038	443	9.3353	424	9.11334	437	20.9939	1156	26.5213	1225	26.6202	1257	6.6373e-29	-1.31468	down
EVM0000350	WBGene00007565	clec-48	14.7128	1769	13.9883	1517	15.1674	1736	6.48566	855	8.25515	912	7.11099	803	3.32191e-29	1.08003	up
EVM0010818	WBGene00008366	tpra-1	14.4336	919	14.1938	815	13.4878	817	29.7674	2075	29.3892	1718	33.5684	2006	2.06208e-29	-1.03144	down
EVM0009037	-	-	5.48371	405	5.52707	368	6.30213	443	0.407106	33	0.681308	47	1.17397	82	1.7436e-29	2.67602	up
EVM0017483	WBGene00000009	aat-8	16.3425	780	17.7361	763	17.5137	795	7.1384	373	6.26853	275	6.1743	277	7.83611e-30	1.44053	up
EVM0004159	WBGene00020339	ttr-59	16.4121	279	14.6166	224	18.5986	301	2.60036	49	1.41421	23	2.12449	34	4.2959e-30	2.71238	up
EVM0000486	-	-	16.3715	260	25.6747	368	30.7073	464	3.6671	64	2.12433	31	2.78039	42	2.29931e-30	2.77419	up
EVM0012918	-	-	73.6774	1428	80.4308	1406	77.0792	1422	38.3653	815	40.5133	721	37.0481	675	1.39778e-30	1.0694	up
EVM0011496	WBGene00007358	lact-6	16.7124	1053	14.4619	822	22.7693	1365	1.9546	135	1.19614	70	1.19545	71	1.23461e-30	3.12237	up
Caenorhabditis_elegans_newGene_81	-	-	64.5206	935	76.7666	1004	68.4759	945	26.9804	429	23.5069	313	28.2373	385	2.73981e-31	1.4583	up
EVM0011131	WBGene00000110	alh-4	32.584	1833	36.3818	1846	37.978	2034	18.7784	1157	17.487	904	16.206	857	1.21544e-31	1.09811	up
EVM0010567	-	-	41.0533	992	38.7411	845	42.6446	981	10.6807	283	5.83246	130	11.7561	267	7.35404e-32	2.06797	up
EVM0009243	WBGene00000140	anc-1	4.36884	1094	3.83639	867	4.74142	1130	9.85554	2703	10.8406	2493	9.11937	2145	2.74262e-32	-1.09462	down
EVM0004440	-	-	2.08477	56	2.59785	63	2.46827	63	13.495	395	14.8474	365	15.9162	400	6.70552e-33	-2.34376	down
EVM0009829	WBGene00008809	cyp-13A11	7.20907	992	5.74097	712	8.10211	1061	2.23619	337	2.47959	314	2.16282	280	6.60936e-33	1.64303	up
EVM0006176	-	-	18.5369	768	16.6988	624	19.1701	756	5.68586	258	6.82663	260	5.38233	210	5.54881e-33	1.63668	up
EVM0011900	WBGene00010924	pycr-1	65.0119	1803	66.4028	1660	58.786	1552	27.2739	829	32.6965	833	29.7994	776	2.16139e-33	1.1565	up
EVM0016470	WBGene00020339	ttr-59	74.4253	1182	85.9906	1231	86.2104	1303	28.2019	491	26.8604	392	35.4985	530	4.09345e-34	1.49201	up
EVM0005537	WBGene00011756	ctg-2	23.9612	945	15.2161	541	21.3001	800	5.0553	219	5.36374	195	4.82254	179	4.08331e-34	1.97234	up
EVM0000124	WBGene00017777	F25B5.6	31.5889	2057	28.4247	1670	31.6623	1963	14.3798	1026	16.1377	966	12.8243	785	3.96663e-34	1.15264	up
EVM0009993	WBGene00015620	C08G9.2	0.356265	73	0.268839	50	0.290829	57	2.24433	502	2.17558	408	1.76039	337	2.27767e-34	-2.44306	down
EVM0015807	WBGene00007653	cysl-1	76.0464	2396	83.7842	2380	82.9975	2489	34.8504	1203	42.7231	1237	42.6792	1263	2.26389e-34	1.09044	up
EVM0016711	WBGene00001971	hmg-1.1	52.2048	1138	62.2034	1223	53.0182	1101	22.6187	541	18.997	381	17.5114	359	1.87306e-34	1.54126	up
Caenorhabditis_elegans_newGene_1028	-	-	109.894	1114	148.131	1354	114.856	1108	44.6154	496	41.1887	384	42.7841	408	1.40609e-34	1.57446	up
EVM0007207	WBGene00016061	hpo-15	25.1078	1298	24.8122	1157	22.395	1102	8.31362	471	10.8152	514	9.11029	443	9.20556e-35	1.41473	up
EVM0001312	WBGene00001077	dpy-18	20.3032	1250	19.2421	1069	18.4653	1083	8.22322	555	8.46842	479	8.61022	498	8.90331e-35	1.26364	up
EVM0016317	-	-	7.06937	318	7.69554	313	6.96139	299	0.400894	20	0.73311	31	1.0607	45	6.75184e-35	2.9816	up
EVM0017165	-	-	105.664	2738	130.523	3050	128.523	3171	45.3786	1289	61.2083	1457	53.0563	1292	4.80698e-35	1.26072	up
EVM0012743	WBGene00022076	daao-1	20.2954	701	17.6851	551	18.6583	613	4.72953	179	4.44395	141	5.97084	194	3.9473e-35	1.90393	up
EVM0003599	WBGene00011662	T09F3.2	44.2049	3343	43.2609	2950	40.2635	2899	17.4564	1446	21.8621	1519	22.6392	1608	3.03991e-35	1.12021	up
EVM0003824	WBGene00000022	abt-4	17.6593	2507	13.1562	1685	19.0489	2575	4.95074	770	5.9336	774	6.76483	902	2.38388e-35	1.54451	up
EVM0000210	WBGene00000118	alh-12	30.3354	1460	30.5907	1328	28.3456	1299	9.44518	498	9.94894	440	13.1419	594	2.29487e-35	1.50645	up
EVM0002057	WBGene00013266	Y57A10A.26	16.2081	501	19.4968	543	21.7071	638	3.266	111	5.0292	143	3.53343	103	1.4233e-35	2.22531	up
Caenorhabditis_elegans_newGene_2782	-	-	29.278	548	28.7079	485	26.0299	464	3.01319	62	6.33005	109	3.33306	59	8.16009e-36	2.5874	up
EVM0008349	WBGene00003517	nac-1	32.9331	1717	26.913	1266	25.9989	1291	9.95159	569	11.9774	574	9.07658	445	4.81513e-36	1.51905	up
EVM0016791	WBGene00019716	M01G5.3	33.8301	1372	33.7535	1235	39.3798	1521	12.6874	564	12.8158	478	15.8481	604	3.89407e-36	1.42648	up
EVM0012189	WBGene00008548	F07A11.5	37.5574	1321	35.7106	1132	36.249	1214	15.9773	616	17.2021	556	16.2222	536	3.21716e-36	1.21813	up
EVM0012251	-	-	4.826	135	6.34756	160	5.60173	149	0	0	0	0	0.141283	4	1.97488e-36	4.19741	up
EVM0013541	WBGene00016577	clec-3	54.7826	2293	62.4344	2356	58.2192	2320	27.6042	1266	28.4772	1095	31.2905	1230	1.13365e-36	1.08212	up
EVM0010594	WBGene00012324	rhy-1	8.93594	583	9.25375	545	12.6033	783	1.46677	105	1.10127	66	2.22789	137	8.69564e-37	2.54845	up
EVM0005328	WBGene00003613	nhr-14	81.6343	3249	62.7278	2251	71.4672	2707	157.142	6850	154.973	5664	152.125	5685	5.44456e-37	-1.00291	down
EVM0009944	WBGene00022788	slc-17.7	3.01311	179	1.98101	106	2.13172	121	12.7914	831	10.9652	597	12.2841	684	4.6126e-37	-2.12382	down
EVM0014207	WBGene00001753	gst-5	79.5376	1502	74.4044	1267	84.057	1511	30.451	630	37.7514	655	33.6168	597	3.68443e-37	1.29256	up
EVM0010794	-	-	120.14	967	128.185	930	173.165	1326	37.4227	330	30.0014	222	42.1754	319	2.61916e-37	1.94103	up
EVM0008053	-	-	21.6894	933	22.7226	882	26.0625	1068	8.32167	393	8.55035	338	8.64668	350	9.99858e-38	1.51454	up
EVM0013756	WBGene00020256	T05C3.6	1.50415	92	1.61891	90	1.71892	101	8.78787	589	9.60422	540	7.72692	444	7.85429e-38	-2.2021	down
EVM0011078	WBGene00001476	fmo-1	10.6887	464	12.2779	480	11.7359	485	33.4594	1589	30.7727	1226	32.5251	1325	1.99195e-38	-1.36142	down
EVM0015955	-	-	106.532	2339	113.976	2257	92.3203	1930	44.6044	1073	44.4921	898	48.9754	1010	1.37934e-38	1.24955	up
EVM0006853	-	-	52.9482	821	54.8128	767	45.9544	679	15.6254	266	15.1681	217	15.8247	231	8.21635e-39	1.74782	up
EVM0014162	WBGene00019782	M60.7	1.28994	92	1.54258	99	1.61094	109	7.48307	581	7.79568	507	9.57959	637	7.57666e-39	-2.25072	down
EVM0013151	WBGene00013902	ZC455.1	2.17652	229	2.47755	235	3.21974	322	10.5955	1217	9.60398	925	11.282	1111	6.62619e-39	-1.83658	down
EVM0014964	WBGene00012149	VF13D12L.3	30.2281	1173	32.956	1154	32.431	1199	13.0609	556	13.3502	476	11.4676	418	4.95152e-39	1.39593	up
EVM0014943	-	-	46.8731	2631	43.4935	2202	49.4663	2643	23.28	1432	25.439	1312	24.8337	1309	2.70072e-39	1.00718	up
EVM0014605	WBGene00020049	ttr-8	83.6037	1256	84.2355	1141	73.4301	1050	29.8224	491	32.4744	448	31.1335	439	1.68133e-39	1.42931	up
EVM0003700	WBGene00003030	lin-45	12.8731	689	12.3858	598	12.6983	647	3.38098	199	4.02315	198	3.30346	167	1.18668e-39	1.84399	up
EVM0015862	-	-	48.6324	1616	45.5754	1366	49.085	1553	22.3124	812	22.4146	684	22.2545	695	7.25569e-40	1.17066	up
EVM0005993	WBGene00006603	tps-2	22.088	503	28.0524	576	28.4336	616	3.75053	94	6.03053	127	4.54223	98	5.43458e-40	2.38432	up
EVM0005047	WBGene00003511	mxl-3	19.0457	694	19.9967	657	15.5493	539	3.54729	142	4.27862	144	2.62845	90	1.64962e-40	2.32753	up
EVM0004674	WBGene00018755	bcmo-2	25.0676	1632	23.2797	1367	25.959	1609	10.3148	736	10.4696	626	11.6369	712	1.07029e-40	1.2659	up
EVM0003861	WBGene00020106	R151.1	6.41492	615	6.77079	585	7.24914	662	17.3276	1819	17.1482	1509	18.2346	1641	6.63689e-41	-1.25573	down
EVM0014743	WBGene00011579	T07D4.2	4.9243	138	5.74566	146	4.41367	118	25.3647	778	24.0731	620	23.0102	606	4.33183e-41	-2.07302	down
EVM0008010	WBGene00012543	nkcc-1	13.8237	1188	14.665	1137	13.2175	1082	3.85575	363	5.39758	427	4.19692	339	3.7534e-41	1.6772	up
EVM0002076	WBGene00017724	F22F7.7	20.9323	995	20.8788	895	23.82	1077	7.73752	403	7.57205	331	8.05229	360	2.6718e-41	1.54019	up
EVM0006204	WBGene00010421	slc-36.4	13.4719	410	12.2938	337	12.7154	368	2.03719	68	1.54984	44	1.17709	34	1.0843e-41	2.81402	up
EVM0000551	WBGene00013946	ZK228.3	9.51194	356	8.33859	282	12.1368	433	1.06678	44	1.11052	39	1.18585	42	4.37525e-42	2.92768	up
EVM0002224	WBGene00022178	cest-25	16.0918	975	16.6485	909	16.3877	945	6.04145	401	5.93299	330	5.84408	333	3.90583e-42	1.51669	up
EVM0014498	WBGene00015650	pkg-2	34.3078	2326	34.624	2117	37.8166	2441	16.1995	1203	17.1471	1068	18.4831	1177	1.61808e-42	1.11971	up
EVM0001205	-	-	21.0734	463	21.4443	425	23.8659	499	67.9609	1635	81.3315	1640	62.5885	1291	1.35683e-42	-1.54434	down
EVM0003605	WBGene00019404	K05B2.4	9.41572	371	8.65054	307	8.85284	332	31.9139	1375	27.2717	986	30.8758	1141	1.11481e-42	-1.60928	down
EVM0005875	WBGene00012437	nmy-3	5.61959	836	5.33737	716	5.48044	776	12.5125	2038	13.9417	1904	14.3062	1997	8.09278e-43	-1.20032	down
EVM0011242	-	-	6.8127	265	7.32825	257	6.54753	243	27.1421	1156	24.4041	872	24.0558	879	5.44443e-43	-1.72727	down
EVM0015041	-	-	25.3846	1349	21.719	1041	22.962	1161	55.7619	3245	61.779	3014	52.3468	2612	1.34421e-43	-1.16998	down
EVM0002716	WBGene00007886	ethe-1	175.999	5760	172.707	5097	171.518	5344	27.1223	973	18.405	554	17.4549	537	6.45159e-44	2.86865	up
EVM0000118	WBGene00004229	ptr-15	7.09426	485	7.42806	458	8.23653	536	0.654836	50	1.32823	84	1.10255	71	4.647e-44	2.74552	up
EVM0006420	WBGene00013088	Y51B9A.6	14.6213	682	13.5563	570	16.7107	742	3.69717	189	3.41503	147	2.77929	122	1.2089e-44	2.16317	up
EVM0000518	WBGene00017686	tpp-2	25.1168	3409	24.1827	2960	27.6458	3572	13.7324	2042	13.5902	1694	12.7809	1629	1.01274e-44	1.02016	up
EVM0012605	WBGene00002021	hsp-17	45.5945	738	46.3451	677	31.1578	480	302.23	5357	267.432	3975	285.67	4341	9.70971e-45	-2.5346	down
EVM0011823	WBGene00003858	ogt-1	8.66189	1230	8.94096	1145	9.34426	1264	20.7346	3226	19.5673	2552	20.1518	2688	1.9799e-45	-1.06468	down
EVM0010513	WBGene00000302	cav-2	30.8917	1289	27.4535	1033	30.6138	1216	11.1473	510	10.8654	417	11.1448	437	7.82795e-46	1.48211	up
EVM0008626	WBGene00011571	ttr-46	43.677	2373	44.2873	2169	44.8276	2318	21.4296	1275	18.3129	914	17.6114	899	6.5803e-46	1.27972	up
EVM0005936	WBGene00004156	pqn-74	22.6085	1038	23.2718	964	22.8771	1000	8.22853	414	8.23547	348	7.88038	340	5.17076e-46	1.55219	up
EVM0001638	WBGene00018913	F56A4.5	38.1413	1570	35.4202	1314	40.3024	1579	15.8554	715	16.1215	610	14.9055	576	4.79946e-46	1.34733	up
EVM0004321	WBGene00001073	dpy-11	41.5796	1516	41.4398	1362	37.0503	1286	15.7892	631	14.8801	499	15.6472	536	4.44919e-46	1.43574	up
EVM0013923	WBGene00044049	sfxn-5	20.1483	620	19.22	534	18.0559	529	4.3251	146	3.36999	96	3.51321	102	2.90216e-46	2.31424	up
EVM0003135	WBGene00007605	hrg-7	41.0102	1688	39.362	1461	46.7893	1833	100.804	4543	95.1737	3597	96.5086	3729	5.70406e-48	-1.09999	down
EVM0014942	WBGene00004113	pqn-24	137.774	3185	144.305	3009	131.476	2894	62.4934	1583	60.7951	1291	70.2693	1526	4.796e-48	1.17199	up
EVM0003381	WBGene00011056	R06B9.5	10.6764	549	12.0593	559	11.6798	572	2.43282	137	2.04932	97	1.82511	89	1.67663e-48	2.39809	up
EVM0009682	WBGene00009177	F26H9.5	37.9705	1580	35.4907	1332	32.9708	1306	13.1065	598	13.7789	527	12.0426	471	3.4159e-49	1.51134	up
EVM0004800	WBGene00012382	ttr-16	897.898	12570	916.248	11567	806.685	10751	490.97	7530	441.516	5678	425.452	5594	3.90139e-50	1.02967	up
EVM0005499	WBGene00002267	lec-4	69.9095	3059	74.5352	2941	70.9157	2954	36.1089	1731	36.5938	1471	37.6015	1545	1.21901e-50	1.04663	up
EVM0005641	-	-	77.2473	1466	77.5481	1327	77.6146	1402	30.1743	628	28.5974	499	24.9665	445	6.47005e-51	1.53051	up
EVM0010285	WBGene00004405	rop-1	48.1564	2937	46.3488	2549	51.2009	2972	24.0901	1609	24.7965	1389	24.5544	1407	8.40208e-52	1.06909	up
EVM0007532	-	-	25.2801	1094	25.8018	1007	23.5356	970	62.3655	2956	71.3092	2834	60.6723	2465	7.53175e-52	-1.27165	down
EVM0001362	-	-	71.591	746	77.2555	726	72.0646	714	17.0059	194	16.2876	156	12.0081	118	5.698e-52	2.27058	up
EVM0005084	WBGene00015993	C18H7.1	133.285	4997	131.822	4456	123.717	4415	56.8918	2337	64.8375	2233	68.4148	2409	2.04301e-52	1.11316	up
EVM0000981	WBGene00011440	sfxn-1.5	42.6452	1277	45.9968	1242	43.7463	1247	110.941	3638	102.108	2808	105.687	2972	1.37322e-52	-1.16517	down
EVM0016088	-	-	32.0154	470	29.8753	396	28.8028	403	4.1076	67	3.12534	43	3.11374	43	1.16181e-52	2.95821	up
EVM0004443	WBGene00013975	ZK455.5	21.7555	681	19.8327	560	17.5248	522	3.11938	107	1.68925	49	2.35865	70	8.7446e-53	2.89473	up
EVM0011656	WBGene00018174	F38B6.4	2.84517	263	3.18824	266	1.94619	171	0	0	0	0	0.021789	2	4.70453e-53	4.94354	up
EVM0006018	WBGene00018755	bcmo-2	28.4006	1852	29.3794	1728	31.6234	1964	11.3187	809	13.0705	783	12.0724	740	1.07109e-53	1.36582	up
EVM0015628	WBGene00001476	fmo-1	10.9014	561	11.1103	516	9.73273	477	33.4497	1886	32.5797	1540	31.8861	1541	6.39161e-54	-1.50711	down
EVM0013887	WBGene00001241	elo-3	51.1298	2430	50.5365	2166	48.0079	2172	110.938	5776	110.125	4808	101.586	4535	3.48339e-54	-1.00964	down
EVM0013510	WBGene00002019	hsp-16.48	36.5409	582	38.9795	559	40.9019	620	7.05713	123	6.61075	97	7.63299	115	8.35297e-55	2.41791	up
EVM0017011	WBGene00006404	tag-10	25.0757	1803	25.7704	1671	28.465	1949	59.8675	4716	61.0299	4031	57.3637	3874	6.90948e-55	-1.06872	down
EVM0003584	WBGene00022515	ttr-48	417.111	6339	387.351	5309	394.764	5711	212.128	3532	181.53	2534	196.21	2801	5.64099e-55	1.10232	up
Caenorhabditis_elegans_newGene_1825	-	-	67.5433	2018	61.5817	1659	60.2113	1713	171.152	5601	156.686	4300	146.195	4102	1.26365e-55	-1.22009	down
EVM0017260	WBGene00010425	lpin-1	42.7278	5198	37.4983	4114	40.4704	4687	87.0908	11605	89.3287	9981	104.267	11912	9.62455e-56	-1.11642	down
EVM0008549	WBGene00000788	cpz-1	87.2303	3120	90.7785	2928	85.8434	2923	37.0535	1452	30.5182	1003	37.3207	1254	2.56886e-56	1.39869	up
EVM0000377	WBGene00012225	W03G11.3	48.9253	2195	50.6144	2048	53.9016	2302	21.6927	1066	22.3451	921	23.0939	973	9.18716e-57	1.26841	up
EVM0006521	WBGene00008741	ctsa-1.2	46.9377	2259	42.5165	1845	46.119	2113	99.9159	5266	97.4478	4306	96.7372	4371	6.50686e-57	-1.01863	down
EVM0013979	WBGene00019489	K07E1.1	263.549	5891	270.397	5450	219.58	4672	106.164	2600	110.562	2270	113.855	2390	4.0706e-57	1.26554	up
EVM0001924	WBGene00009142	F26A3.4	33.1393	2345	31.9144	2036	38.9053	2620	8.79616	682	11.5263	749	12.0475	801	2.36502e-57	1.73706	up
EVM0010580	WBGene00001749	gst-1	121.454	2707	114.84	2309	121.483	2578	52.4883	1282	57.6912	1182	55.9357	1171	1.38628e-58	1.18647	up
EVM0006011	WBGene00019489	K07E1.1	93.8348	2141	100.26	2063	84.2947	1831	34.1442	854	32.2754	677	34.5751	741	6.64632e-59	1.52692	up
EVM0013332	-	-	227.8	3329	216.573	2854	208.081	2895	87.1151	1395	86.0063	1155	100.7	1383	5.75238e-59	1.32634	up
EVM0005406	WBGene00022394	natb-1	263.577	5535	271.684	5145	293.086	5859	126.586	2912	146.323	2823	121.164	2390	4.37716e-59	1.15266	up
EVM0002629	WBGene00019326	K02F3.2	28.2151	3963	28.4757	3607	31.1198	4161	13.4546	2071	12.8223	1655	14.5618	1921	3.48761e-59	1.18229	up
EVM0010333	WBGene00018701	pccb-1	195.162	12175	195.608	11004	176.163	10462	100.203	6848	87.9669	5041	94.7659	5553	1.72985e-59	1.08359	up
EVM0009106	WBGene00009785	F46C5.10	105.582	1987	140.941	2392	106.602	1910	30.2246	624	25.1639	435	32.86	581	1.44093e-59	2.0286	up
Caenorhabditis_elegans_newGene_2393	-	-	50.1664	999	48.1497	867	48.1773	916	13.2789	292	12.876	237	11.2	210	1.16705e-59	1.9969	up
EVM0011742	-	-	36.9768	700	44.3717	757	40.6735	733	7.44813	155	7.19042	125	8.4518	151	1.11227e-59	2.38629	up
EVM0003611	WBGene00016103	dpyd-1	27.2533	2901	24.9758	2398	25.8279	2618	57.4203	6696	56.9348	5567	64.1012	6408	6.68174e-60	-1.09306	down
EVM0011495	WBGene00021835	Y54E10A.17	8.21098	168	7.33348	135	6.85504	134	40.5968	907	40.2143	753	41.9203	803	2.90656e-60	-2.27103	down
EVM0003547	WBGene00011436	T04F3.1	13.6304	2398	13.4844	2139	13.7736	2307	5.38357	1038	4.66	753	5.59929	925	1.11703e-60	1.45363	up
EVM0000616	WBGene00008332	C55A6.3	29.7701	725	29.6534	652	35.6112	826	6.06858	162	6.01803	135	6.01492	138	7.98218e-62	2.38226	up
EVM0012204	WBGene00008538	sqrd-1	93.2841	5287	93.5496	4781	101.084	5454	47.4973	2949	44.8589	2336	39.8289	2120	5.62604e-62	1.20082	up
EVM0017238	WBGene00018682	aagr-4	44.7081	3952	40.9091	3261	39.86	3354	11.2491	1090	15.572	1265	15.2577	1267	2.93246e-62	1.63995	up
EVM0014199	WBGene00000373	cyp-14A5	0.889245	77	0.963014	76	1.13026	94	8.27033	784	7.93484	631	7.37171	599	1.56717e-63	-2.73554	down
EVM0000630	WBGene00001243	elo-5	93.8949	2687	89.7728	2317	87.3514	2380	32.5802	1022	27.2763	717	23.4975	632	1.45385e-63	1.75232	up
EVM0008708	WBGene00000973	dhs-9	41.7089	1957	39.936	1690	40.4591	1807	15.9404	820	14.8801	642	13.8565	611	1.37032e-63	1.51529	up
EVM0000381	WBGene00009920	abts-1	24.5005	2350	23.1064	1999	22.0693	2015	8.74893	920	7.21658	636	7.52571	678	7.28979e-64	1.62734	up
EVM0003343	WBGene00006608	tre-2	86.0969	7002	83.6717	6137	86.5364	6700	30.5972	2726	38.4457	2872	39.8087	3041	5.87148e-64	1.31346	up
EVM0001898	WBGene00002011	hsp-12.2	247.28	7486	268.66	7334	216.216	6231	35.0523	1163	28.1297	783	24.7955	705	5.87148e-64	2.95846	up
EVM0014692	WBGene00008538	sqrd-1	119.938	6838	114.002	5861	128.931	6998	55.9169	3493	61.9269	3243	51.1943	2742	4.93443e-65	1.18256	up
EVM0014282	WBGene00000528	clh-1	8.66167	696	6.67364	484	7.68778	588	0.866176	77	0.934282	69	0.585413	45	2.59518e-65	3.12477	up
EVM0013589	WBGene00021768	Y51F10.7	175.552	3170	172.539	2809	187.988	3231	438.27	8667	405.466	6724	390.316	6618	2.82533e-66	-1.10462	down
EVM0013911	WBGene00002249	lap-1	56.3338	2569	55.2977	2274	58.7039	2548	136.863	6836	125.332	5249	140.812	6030	1.65452e-66	-1.1433	down
EVM0001719	WBGene00014258	ZK1320.9	46.7802	2080	38.6946	1552	39.1596	1658	12.7399	621	12.6801	518	13.35	558	1.22738e-66	1.74125	up
EVM0001798	WBGene00018760	irg-3	117.458	3614	103.109	2861	117.806	3450	48.1039	1622	47.3456	1338	50.3267	1454	1.12569e-66	1.29143	up
EVM0017372	WBGene00017698	F22B7.9	97.9936	4907	97.3587	4397	105.866	5047	49.5028	2716	45.3973	2088	48.278	2271	4.74273e-68	1.15285	up
EVM0009954	WBGene00000370	ccg-1	297.195	7884	307.128	7347	290.327	7331	124.759	3626	138.034	3364	151.722	3780	2.14232e-68	1.19134	up
EVM0006757	WBGene00003549	nas-31	42.8328	2895	43.6299	2659	41.9516	2699	96.1254	7116	91.7244	5693	93.6517	5944	3.16182e-69	-1.0353	down
EVM0007291	WBGene00010759	cysl-2	56.6068	1900	58.4679	1770	55.3456	1768	20.3633	749	17.617	543	18.7299	591	2.87927e-69	1.64791	up
EVM0008155	-	-	75.4711	5726	71.1474	4868	83.2581	6013	35.1332	2920	35.6858	2487	37.3278	2660	2.42052e-69	1.16857	up
EVM0007403	WBGene00019619	asp-14	139.297	5402	130.073	4549	137.689	5083	70.6074	3000	69.132	2463	69.5235	2532	2.84607e-70	1.04331	up
EVM0015471	WBGene00011737	sqst-1	44.4831	4963	45.9757	4626	48.7433	5177	20.0392	2450	19.9936	2049	22.5954	2368	4.49772e-71	1.23165	up
EVM0000409	WBGene00021430	Y38F2AR.12	6.9442	900	6.28596	735	8.59177	1060	1.07888	154	1.27777	153	1.05224	129	3.34111e-71	2.64546	up
EVM0010650	WBGene00000982	dhs-19	23.8747	994	19.0397	715	22.1713	879	3.58299	164	4.06249	156	3.09859	122	1.62649e-71	2.57721	up
EVM0001549	-	-	15.0207	1433	15.441	1328	15.2792	1387	36.8398	3849	41.4748	3633	42.0831	3769	8.33045e-72	-1.29189	down
EVM0012566	WBGene00017312	pitr-5	8.94648	477	9.80783	472	9.54404	485	0.772374	46	0.46684	23	0.667138	34	3.10518e-72	3.61822	up
EVM0016676	WBGene00000779	cpn-3	306.223	7662	296.167	6683	291.889	6953	123.964	3398	116.101	2669	142.193	3342	2.86422e-72	1.30342	up
EVM0008735	WBGene00013088	Y51B9A.6	20.3089	910	22.1932	896	23.3655	996	3.36927	166	3.93427	162	2.36574	100	5.78362e-73	2.72934	up
EVM0008281	WBGene00017719	ldp-1	37.7851	1990	36.47	1732	38.9216	1951	10.9424	632	10.0399	486	12.7675	632	4.56458e-73	1.80028	up
EVM0008039	WBGene00021564	Y45G12B.3	50.8894	2367	48.476	2034	46.1985	2046	16.66	849	14.3479	613	13.4741	589	1.83026e-74	1.767	up
EVM0007535	WBGene00001404	fbp-1	253.249	9400	240.859	8062	220.132	7779	105.545	4292	111.061	3787	94.1189	3281	8.41744e-75	1.28053	up
EVM0002843	WBGene00000739	col-166	843.517	24835	856.351	22736	768.245	21532	442.896	14285	431.682	11674	416.059	11505	8.36567e-76	1.02043	up
EVM0003079	WBGene00021948	kvs-5	3.18288	235	2.20426	147	2.68335	189	15.3592	1242	16.9971	1153	16.5744	1149	6.22518e-76	-2.42229	down
EVM0003534	WBGene00011561	ttr-15	488.084	5799	489.399	5244	419.655	4747	180.85	2354	155.13	1693	175.342	1957	1.53769e-76	1.5205	up
EVM0011872	-	-	409.641	5622	413.869	5122	384.737	5027	160.41	2412	138.203	1743	167.348	2157	1.798e-77	1.4475	up
EVM0000173	WBGene00013263	txdc-12.1	142.621	3100	144.562	2834	128.822	2666	49.6143	1182	48.4715	968	41.4314	846	9.51271e-78	1.6421	up
EVM0017357	WBGene00008341	ttr-44	67.7484	974	59.3706	770	77.7384	1064	7.86659	124	6.80505	90	10.5459	143	4.12521e-78	2.95783	up
EVM0017600	WBGene00017864	pcca-1	143.007	11095	139.422	9754	141.342	10439	77.2118	6562	72.3271	5154	69.7057	5079	2.76088e-78	1.03482	up
EVM0003471	WBGene00019819	aass-1	33.2872	3296	32.5172	2904	29.3744	2769	77.9584	8456	77.1929	7021	75.8142	7050	2.61082e-79	-1.17933	down
EVM0006497	WBGene00014108	ZK856.7	234.765	4930	252.058	4773	226.698	4532	97.8424	2251	106.524	2055	92.1994	1819	3.36153e-80	1.34553	up
EVM0003069	WBGene00017838	F26G1.2	66.5769	3410	65.4389	3022	72.891	3554	28.3824	1593	28.5029	1341	26.282	1265	2.74747e-80	1.37685	up
EVM0007565	WBGene00002017	hsp-16.11	60.5281	876	61.4047	801	59.8486	824	10.9486	174	10.7047	143	10.7234	146	5.5576e-81	2.4906	up
EVM0017573	WBGene00016995	acly-1	58.8004	6530	55.5432	5562	63.1036	6671	28.0885	3417	26.7353	2727	27.5488	2874	3.72588e-81	1.1881	up
EVM0013631	WBGene00009483	F36G3.2	37.1798	1544	33.7277	1263	36.6147	1447	7.97562	363	7.4785	286	9.45396	369	1.10979e-82	2.1471	up
EVM0009908	WBGene00019779	endu-2	102.639	6060	88.4334	4708	99.6364	5600	244.428	15808	226.163	12265	239.466	13278	1.09322e-82	-1.19017	down
EVM0003073	WBGene00008000	slc-17.2	39.2362	2778	35.0437	2238	41.4476	2794	97.7	7577	101.092	6574	108.312	7202	5.96595e-83	-1.30601	down
EVM0012130	WBGene00001852	hil-1	153.252	3035	153.177	2736	140.123	2642	44.3831	963	42.6368	776	52.2632	972	1.34743e-83	1.74482	up
EVM0005164	WBGene00006688	twk-36	12.6839	825	11.8401	695	11.4799	711	1.21251	87	1.62801	98	1.55518	95	5.6901e-85	2.98412	up
EVM0006779	WBGene00018760	irg-3	191.725	4391	185.256	3826	199.436	4349	75.2246	1888	68.4859	1441	79.8896	1719	6.06179e-86	1.44076	up
EVM0008224	WBGene00008032	C39E9.8	259.852	6885	259.163	6192	285.291	7196	119.727	3475	128.014	3116	130.385	3245	2.04197e-86	1.17209	up
EVM0014411	WBGene00019719	M01H9.3	224.382	5828	240.067	5623	240.086	5937	95.4956	2717	101.81	2429	109.084	2661	1.71395e-87	1.28278	up
EVM0017551	WBGene00010540	K03H1.5	29.6261	4409	29.8548	4007	31.1942	4419	13.2288	2157	13.4856	1844	13.9763	1954	2.60213e-89	1.23762	up
EVM0009562	WBGene00020369	exc-15	77.4952	2727	76.5932	2431	72.5718	2431	27.6999	1068	27.1758	879	26.6396	881	2.02073e-89	1.54773	up
EVM0003217	WBGene00000780	cpn-4	68.8399	1154	82.0631	1241	73.7329	1177	234.338	4303	240.684	3706	255.137	4017	5.85555e-90	-1.59104	down
EVM0006411	WBGene00003844	odc-1	38.3804	2035	40.2233	1924	42.9035	2166	104.862	6091	107.561	5239	115.068	5730	1.0541e-90	-1.32897	down
EVM0007411	WBGene00006603	tps-2	15.216	1720	15.4002	1570	12.7061	1367	3.02607	375	3.16259	329	2.62423	279	8.25599e-91	2.32695	up
EVM0007462	WBGene00012140	T28F4.5	163.056	5762	173.697	5535	167.507	5635	56.8751	2202	60.7283	1972	69.8541	2319	2.67231e-91	1.50332	up
EVM0008670	WBGene00012149	VF13D12L.3	88.2879	3394	84.3076	2923	85.1115	3115	29.6192	1248	34.0407	1202	33.0049	1192	6.33775e-93	1.49215	up
EVM0015005	WBGene00011522	srap-1	23.2742	11410	23.0166	10175	22.8804	10678	8.85393	4755	10.8382	4881	10.2888	4738	1.40184e-93	1.28916	up
EVM0009706	WBGene00018491	mdh-1	316.024	11711	312.599	10446	290.293	10241	136.186	5529	119.166	4056	129.364	4503	6.22191e-94	1.3352	up
EVM0006287	WBGene00021835	Y54E10A.17	18.8675	422	17.0109	343	20.8627	444	84.2077	2062	87.5867	1799	82.8117	1739	2.69343e-96	-2.03735	down
EVM0003271	WBGene00012812	Y43F8B.1	69.6669	3420	69.3956	3072	61.2161	2861	21.4207	1152	19.68	888	21.6456	998	1.00381e-96	1.74125	up
EVM0006789	WBGene00015074	natc-2	59.8932	2178	60.4786	1983	72.0768	2495	16.5758	661	16.9519	566	16.9143	578	9.97112e-101	1.9884	up
EVM0015578	WBGene00008732	F13B12.4	114.332	5764	102.629	4666	97.7292	4690	39.3742	2175	38.4356	1780	37.903	1795	8.67342e-101	1.5192	up
EVM0006340	WBGene00008332	C55A6.3	82.363	2104	85.708	1975	98.9714	2407	21.5515	604	18.8687	443	16.9205	406	6.24794e-101	2.25709	up
EVM0002485	WBGene00006603	tps-2	16.23	1430	14.3123	1137	14.6751	1231	2.45807	238	2.82905	229	2.92076	242	1.52938e-102	2.48878	up
EVM0014997	WBGene00001971	hmg-1.1	437.042	5757	502.982	5974	466.476	5849	174.698	2521	160.052	1937	163.675	2025	5.25095e-108	1.57124	up
EVM0006296	WBGene00013266	Y57A10A.26	109.699	4789	109.532	4312	107.199	4456	36.7423	1758	43.9621	1763	39.7095	1629	4.88577e-108	1.51786	up
EVM0010242	WBGene00013008	clec-146	207.704	5765	193.594	4845	208.491	5509	84.7886	2578	79.81	2035	77.051	2009	4.88577e-108	1.41384	up
EVM0013935	WBGene00007191	lgc-20	27.1912	2855	25.9633	2459	27.5755	2757	9.11837	1049	8.87567	856	8.84905	873	1.62516e-110	1.66109	up
EVM0008625	WBGene00000749	col-176	841.649	28552	877.409	26841	798.528	25788	396.704	14743	424.537	13229	398.203	12688	1.77241e-111	1.13207	up
EVM0011283	WBGene00019211	H18N23.2	40.0416	2993	35.8385	2415	42.5461	3027	10.8295	887	11.9965	824	11.0289	775	6.30499e-112	1.87246	up
EVM0010318	WBGene00045052	K12C11.6	116.097	3362	120.531	3147	128.317	3537	40.6283	1289	40.2043	1070	36.079	981	3.9606e-112	1.71297	up
EVM0011062	WBGene00007836	C31C9.2	69.2201	2060	66.3531	1780	53.7615	1523	5.9553	195	8.36777	229	8.96331	251	2.69087e-112	3.01086	up
EVM0006938	WBGene00010174	F56H9.2	383.02	4363	386.807	3973	396.293	4297	133.919	1671	150.692	1577	151.387	1620	2.3353e-112	1.49882	up
EVM0016026	WBGene00003891	osm-11	164.011	5912	182.62	5936	173.83	5965	57.6541	2277	55.667	1843	46.7271	1582	2.63927e-113	1.77088	up
Caenorhabditis_elegans_newGene_381	-	-	171.773	3692	177.115	3433	161.519	3305	54.412	1281	49.0425	969	50.6859	1024	2.40451e-119	1.7958	up
EVM0011461	WBGene00008654	pfas-1	23.0806	2796	18.3146	2001	17.2445	1989	2.93519	390	2.16691	242	2.63898	301	2.13324e-120	2.91502	up
EVM0001128	WBGene00003163	mdl-1	229.268	13057	218.866	11240	212.032	11495	99.3324	6197	100.833	5275	93.3899	4996	3.66126e-121	1.25328	up
EVM0012034	WBGene00018955	F56C11.3	89.9533	2693	93.5536	2526	98.8698	2818	15.3697	504	13.7934	380	9.25188	261	2.62696e-121	2.87806	up
EVM0013734	WBGene00011409	T04A8.7	63.179	4400	62.6683	3935	60.6751	4022	18.968	1447	20.9059	1338	22.1228	1447	3.02209e-122	1.66528	up
EVM0004987	-	-	110.755	2812	110.209	2524	97.8013	2364	27.347	761	25.4055	593	26.6162	635	1.22152e-122	2.06478	up
EVM0009573	WBGene00007024	plin-1	66.2288	2837	69.6254	2689	66.0693	2694	14.608	686	13.9707	550	17.6235	709	4.02304e-123	2.18233	up
EVM0003437	WBGene00007913	cyp-36A1	114.83	6438	112.038	5664	123.406	6586	45.8201	2814	44.3188	2283	41.8436	2204	9.98664e-126	1.48669	up
EVM0012109	WBGene00010383	mpst-3	99.6638	3167	89.787	2573	97.1468	2939	21.6904	755	18.6391	544	15.9591	477	3.74157e-128	2.38971	up
EVM0005293	WBGene00000102	akt-1	115.288	9893	126.905	9820	128.231	10475	42.4127	3987	39.1548	3087	45.3128	3652	4.60548e-130	1.62181	up
EVM0017104	-	-	85.0131	1519	96.2276	1551	79.7986	1358	8.5032	167	8.10396	134	10.8206	182	5.27809e-138	3.2301	up
EVM0006283	WBGene00007836	C31C9.2	125.609	3714	130.789	3487	110.139	3100	16.5266	536	22.5201	612	22.6166	628	2.73619e-139	2.61196	up
EVM0011980	WBGene00014001	pyk-2	161.288	9235	152.153	7856	149.941	8173	59.1362	3710	54.5632	2870	57.8485	3111	1.21504e-141	1.51311	up
EVM0010833	WBGene00001501	ftn-2	1060.49	22400	1021.53	19457	993.274	19972	442.791	10246	441.841	8573	402.437	7984	1.25019e-143	1.3404	up
EVM0006502	WBGene00010759	cysl-2	174.842	5889	155.775	4731	146.804	4707	40.9379	1511	34.9529	1082	37.8414	1197	8.71942e-146	2.1303	up
EVM0008527	WBGene00011409	T04A8.7	74.2239	5196	74.2346	4686	69.2301	4614	23.9297	1835	25.3295	1629	24.0786	1583	1.46157e-146	1.64849	up
EVM0014284	WBGene00010755	vglu-2	42.5049	4240	42.4078	3815	38.8551	3690	6.19065	677	6.83499	627	8.70896	816	7.09311e-147	2.55365	up
EVM0008744	WBGene00008167	acox-1.5	37.9275	2570	33.1925	2029	33.718	2175	137.74	10224	132.25	8231	121.584	7738	3.9729e-151	-1.79446	down
EVM0004003	WBGene00001756	gst-8	131.95	2702	112.344	2075	125.015	2437	23.1951	521	21.5559	406	24.5957	474	2.59985e-151	2.45882	up
EVM0006839	WBGene00018393	msra-1	142.022	3641	138.312	3198	173.047	4223	21.7875	612	25.6264	604	28.1832	679	1.91443e-155	2.62656	up
EVM0011142	WBGene00019962	cysl-3	164.434	5473	165.019	4953	177.499	5624	51.9115	1893	46.9451	1435	44.7731	1400	4.13548e-156	1.89011	up
EVM0003505	WBGene00044049	sfxn-5	78.9501	2870	79.875	2619	78.4975	2717	15.6947	625	17.0807	571	13.1712	450	7.01281e-158	2.42134	up
EVM0016108	WBGene00010135	F55H12.4	214.511	8516	200.799	7188	210.991	7974	53.1746	2313	49.2867	1798	61.5408	2295	2.87351e-160	2.00178	up
EVM0008733	WBGene00003589	nex-2	114.17	4999	101.805	4020	120.979	5042	26.2411	1259	29.3909	1182	29.6696	1220	3.55423e-161	2.0512	up
EVM0008796	WBGene00018342	F42A10.6	102.086	2110	79.3645	1479	93.0153	1830	10.625	241	10.9479	208	10.3581	201	1.78508e-161	3.11242	up
EVM0007227	WBGene00007533	cbl-1	146.949	7647	136.64	6412	151.844	7522	52.15	2973	51.778	2475	51.0908	2497	5.17473e-164	1.57034	up
EVM0002741	WBGene00002011	hsp-12.2	158.673	4896	162.782	4530	144.882	4256	42.1226	1424	39.8885	1131	41.7145	1209	3.05814e-164	1.98446	up
EVM0010494	-	-	57.2263	1905	54.8698	1647	72.4645	2296	6.43524	235	5.76025	177	6.28555	197	1.92124e-165	3.30829	up
EVM0014220	WBGene00010878	M05D6.5	628.749	20635	641.153	18975	657.11	20530	253.963	9131	236.805	7139	223.748	6897	6.26945e-167	1.51261	up
EVM0000788	WBGene00019978	hacd-1	32.1482	1202	32.3319	1090	32.2178	1146	1.85706	77	2.30666	80	1.45492	52	1.33066e-167	4.00581	up
EVM0010913	-	-	20.2523	1463	18.9796	1237	20.1959	1389	1.55469	124	1.67089	111	2.0318	138	9.19857e-172	3.4812	up
EVM0007241	WBGene00012445	Y16B4A.2	43.551	8658	43.0827	7723	51.5498	9755	13.0591	2844	12.8879	2354	12.4545	2326	2.71989e-172	1.91972	up
EVM0001744	WBGene00016610	paqr-1	48.6957	3280	48.9681	2975	50.2671	3224	147.12	10856	144.29	8928	149.696	9470	3.90868e-177	-1.47822	down
Caenorhabditis_elegans_newGene_2085	-	-	449.346	8912	451.254	8071	449.388	8485	101.194	2199	107.564	1960	127.63	2378	3.65388e-178	2.07514	up
EVM0010792	WBGene00001430	fkb-5	211.885	7533	209.887	6729	209.213	7081	74.1381	2888	78.8252	2574	73.8651	2467	1.36556e-186	1.55878	up
EVM0008149	WBGene00010593	gsnl-1	47.1901	2523	41.3035	1991	37.3516	1901	3.99106	234	4.33948	214	4.49247	226	1.01567e-191	3.30368	up
EVM0009488	WBGene00010878	M05D6.5	524.123	7724	534.142	7098	550.386	7721	145.761	2353	140.09	1897	122.583	1697	1.28152e-204	2.04962	up
EVM0008079	WBGene00001756	gst-8	222.587	4763	218.768	4222	226.139	4607	63.3613	1486	64.3765	1266	63.4553	1276	2.44325e-205	1.88029	up
EVM0003838	WBGene00011571	ttr-46	618.559	15496	656.716	14836	672.154	16030	214.34	5883	214.054	4926	198.59	4673	8.44978e-228	1.71625	up
EVM0015867	WBGene00011232	pck-2	1688.48	116270	1635.45	101555	1614.92	105863	630.345	47550	596.794	37748	620.715	40144	5.61089e-245	1.50293	up
EVM0007961	WBGene00022505	ZC21.3	58.2707	3575	60.7948	3363	57.5992	3364	254.724	17116	240.994	13578	272.651	15708	8.83042e-248	-2.0167	down
EVM0015527	WBGene00008446	E01G4.3	383.212	8153	375.524	7205	356.592	7223	80.5389	1878	87.1854	1704	72.6761	1453	2.37534e-252	2.28541	up
EVM0001434	WBGene00000110	alh-4	96.2552	4197	106.743	4197	107.983	4482	17.4532	834	16.9196	678	18.6635	765	6.83478e-253	2.61168	up
EVM0002805	WBGene00008409	mpst-1	101.99	3927	97.7105	3393	99.4127	3644	13.9448	589	16.6526	589	13.0618	473	2.64475e-253	2.83053	up
EVM0004308	WBGene00001755	gst-7	446	9366	442.368	8377	462.721	9250	100.89	2321	89.9754	1736	83.3487	1644	1.55722e-261	2.36819	up
EVM0007984	WBGene00016987	CC8.2	99.842	6024	102.938	5600	98.7377	5671	20.7238	1370	19.3153	1071	17.7347	1005	4.83346e-267	2.44959	up
EVM0005930	WBGene00001756	gst-8	278.357	5769	261.501	4887	302.285	5964	38.9293	884	34.4341	656	29.8551	582	8.99842e-276	3.07046	up
EVM0012613	WBGene00011321	fil-1	68.9442	4344	64.7268	3678	75.3297	4518	10.7278	741	9.91158	574	10.0854	597	1.80616e-278	2.81999	up
EVM0005891	WBGene00020696	pygl-1	340.013	29792	336.346	26576	320.663	26747	67.6573	6494	67.6364	5444	63.194	5201	0	2.40817	up
EVM0013705	WBGene00017659	F21C10.10	123.17	5408	127.115	5033	128.217	5359	5.65169	272	8.18901	331	6.65177	275	0	4.23694	up
EVM0012839	WBGene00000169	aqp-1	261.499	7362	254.585	6464	280.923	7529	18.9367	584	21.0845	546	21.0807	558	0	3.76256	up
EVM0003257	WBGene00022500	lfi-1	31.6636	6510	28.0149	5194	30.1826	5907	3.04752	687	3.13567	593	2.84783	550	0	3.37024	up
EVM0007170	WBGene00004258	pyc-1	144.541	17102	140.443	14985	152.493	17177	37.3615	4843	36.0908	3923	38.8036	4312	0	2.04182	up
EVM0013313	WBGene00002017	hsp-16.11	499.669	15524	479.027	13421	469.007	13872	104.619	3561	92.4655	2639	90.7278	2648	0	2.40155	up
EVM0010334	WBGene00007886	ethe-1	138.433	4527	149.417	4406	143.28	4460	17.3304	621	14.3002	430	14.4536	444	0	3.26628	up
EVM0003068	WBGene00021533	Y42G9A.3	103.742	5479	95.4222	4544	105.975	5328	12.7543	738	14.5942	708	15.6445	776	0	2.88735	up
EVM0007061	WBGene00001755	gst-7	197.678	5238	206.601	4937	210.037	5298	28.9173	840	30.1864	735	31.8862	794	0	2.82104	up
EVM0003795	-	-	0.472979	13	0.825071	21	0.344629	9	134.372	4000	145.42	3630	149.625	3819	0	-7.29137	down
