# Supplementary material for: Transcriptome Analysis of the Nematodes Caenorhabditis elegans and Litoditis marina in Different Food Environments
Source: MDPI journal article supplement (doi:10.3390/jmse10050580), 2022-04-25
Supplement: s1 [file s1 › Supplementary File S3.xlsx]

## Sheet: q-PCR analysis
		Log2 Fold change by RNA-seq#	log2 Fold change by qPCR*	Correlation analysis
C. elegans	gst-4	2.02216	1.81913	Pearson R	0.9501
	acox-3	1.8656	1.56563	95% confidence interval	0.7750 to 0.9897
	sod-3	1.61643	2.04114	P value (two-tailed)	< 0.0001
	eif-6	-1.29582	-0.97029	P value summary	***
	hsp-1	-1.77868	-2.25935	Is the correlation significant? (alpha=0.05)	Yes
L. marina	gst-8	1.88029	0.445579	R squared	0.9027
	dhs-2	2.11189	2.26552
	ugt-19	-1.406	-2.21463
	elo-3	-1.00964	-1.33691
			#: Fold change indicates the average ratio of three biological replicates for each treatment group (CeMM) to the control group (OP50) based on FPKM value.
			*: Fold change indicates the average ratio of three biological replicates for each treatment group (CeMM) to the control group (OP50) calculated by the delta delta Ct method.

## Sheet: RNA-seq data of qPRC genes
Species	gene ID	gene name	N2-OP501_Count	N2-OP502_Count	N2-OP503_Count	N2-CeMM1_Count	N2-CeMM2_Count	N2-CeMM3_Count	N2-OP501_FPKM	N2-OP502_FPKM	N2-OP503_FPKM	N2-CeMM1_FPKM	N2-CeMM2_FPKM	N2-CeMM3_FPKM	FDR	log2FC	regulated
C. elegans	WBGene00001752	gst-4	1458	1050	1381	6588	6925	7333	49.3583	31.1292	38.9244	194.599	192.141	207.329	1.13584e-27	2.02216	up
C. elegans	WBGene00019060	acox-3	562	625	694	2755	3030	2971	7.58154	7.40612	7.80211	32.5053	33.5884	33.5671	2.70663e-106	1.8656	up
C. elegans	WBGene00004932	sod-3	97	67	117	319	367	455	3.22679	1.93004	3.23515	9.28316	10.0276	12.6654	2.14815e-11	1.61643	up
C. elegans	WBGene00002005	hsp-1	106560	111953	124105	39892	43610	43314	1438.41	1324.32	1395.1	469.852	482.454	488.295	0	-1.77868	down
C. elegans	WBGene00001234	eif-6	5053	5464	5631	2470	3065	2822	143.95	136.629	132.582	61.2513	71.1646	66.7717	9.80981e-71	-1.29582	down
L. marina	EVM0002754	dhs-2	3.56861	161	3.67454	150	4.00572	172	0.474568	24	0.914078	38	0.735724	32	6.44399e-15	2.11189	up
L. marina	EVM0008079	gst-8	222.587	4763	218.768	4222	226.139	4607	63.3613	1486	64.3765	1266	63.4553	1276	2.44325e-205	1.88029	up
L. marina	EVM0005671	ugt-19	3.84324	193	2.59483	118	3.60993	173	11.451	629	9.21555	424	9.56917	451	7.30024e-15	-1.406	down
L. marina	EVM0013887	elo-3	51.1298	2430	50.5365	2166	48.0079	2172	110.938	5776	110.125	4808	101.586	4535	3.48339e-54	-1.00964	down
