# Supplementary material for: Transcriptome Analysis of the Nematodes Caenorhabditis elegans and Litoditis marina in Different Food Environments
Source: MDPI journal article supplement (doi:10.3390/jmse10050580), 2022-04-25
Supplement: s1 [file s1 › Supplementary File S4.xlsx]

## Sheet: Sheet1
Comparison with Szewczyk et microarray data 12 genes were significantly changed in our data. Yellow represents a consistent trend
gene ID	gene name	N2-OP501_FPKM	N2-OP502_FPKM	N2-OP503_FPKM	N2-CeMM1_FPKM	N2-CeMM2_FPKM	N2-CeMM3_FPKM	FDR	log2FC	regulated	microarray data*(Fold decrease)
WBGene00010582	K05C4.5	63.384	61.6652	59.493	29.1627	26.2802	26.4825	1.56144e-108	-1.42116	down	2.31±0.22 (down-regulated)
WBGene00004456	rpl-43	1409.44	1773.01	1565.91	631.182	815.415	871.186	7.40179e-13	-1.26925	down	2.49±0.12 (up-regulated)
WBGene00003473	mtl-1	0.351447	1.77791	1.44759	70.5781	74.6193	84.7797	4.60673e-28	4.88682	up	2.85±0.27 (up-regulated)
WBGene00008132	gale-1	105.591	93.5479	109.294	42.1703	36.5633	40.6549	5.74115e-102	-1.61627	down	3.01±0.24 (down-regulated)
WBGene00006489	zhit-3	55.652	50.4935	55.6738	20.7565	19.6636	19.5422	1.77686e-112	-1.67839	down	2.23±0.06 (down-regulated)
WBGene00014258	ZK1320.9	36.5305	36.7434	39.2296	119.792	124.474	115.41	8.72275e-116	1.42009	up	2.44±0.22 (down-regulated)
WBGene00004481	rps-12	3200.47	3416.9	3156.34	1901.39	1931.5	1956.78	3.56693e-88	-1.00642	down	2.37±0.20 (up-regulated)
WBGene00003474	mtl-2	8.39603	12.0902	12.9799	32.4348	35.2221	37.3167	6.43429e-12	1.35739	up	3.92±0.36 (up-regulated)
WBGene00001028	dnj-10	54.5257	51.2324	48.1009	29.0843	31.5656	26.7596	7.95628e-40	-1.06219	down	2.36±0.15 (down-regulated)
WBGene00004498	rps-29	382.579	473.202	411.033	138.292	190.522	193.269	2.46171e-15	-1.49749	down	2.47±0.16 (up-regulated)
WBGene00004495	rps-26	3083.35	3387.91	3009.51	1764.81	1818.03	1940.42	1.6536e-63	-1.02856	down	2.10±0.15 (up-regulated)
WBGene00004490	rps-21	1040.58	1240.65	1076.42	416.433	571.798	583.69	8.09535e-13	-1.31909	down	2.60±0.20 (up-regulated)
Note：*microarry date were from Szewczyk et work. Values are means ± s.d. of log2 (N=3).
