# Supplementary material for: Transcriptome Analysis of the Nematodes Caenorhabditis elegans and Litoditis marina in Different Food Environments
Source: MDPI journal article supplement (doi:10.3390/jmse10050580), 2022-04-25
Supplement: s1 [file s1 › Supplementary File S5.xlsx]

## Sheet: DAF-16 target genes
A total of 41 daf-16 target genes were altered in our study. Marked yellow genes was reported to be associated with longevity.
gene ID	gene name	N2-OP501_Count	N2-OP502_Count	N2-OP503_Count	N2-CeMM1_Count	N2-CeMM2_Count	N2-CeMM3_Count	N2-OP501_FPKM	N2-OP502_FPKM	N2-OP503_FPKM	N2-CeMM1_FPKM	N2-CeMM2_FPKM	N2-CeMM3_FPKM	FDR	log2FC	regulated
WBGene00018491	mdh-1	14805	16390	17410	40348	43487	43738	359.56	348.606	352.293	853.915	864.722	886.403	7.60168e-118	1.04461	up
WBGene00020784	tat-4	1212	1316	1467	4339	4839	4576	28.2235	28.7534	29.405	106.647	114.573	108.128	3.55818e-93	1.43357	up
WBGene00015479	wht-1	104	114	110	518	625	451	1.37978	1.52945	1.20261	6.05752	6.84188	5.03767	1.63011e-22	1.88644	up
WBGene00019472	cyp-35B1	11	9	0	148	170	223	0.184183	0.126591	0	2.17122	2.35264	3.13885	9.19186e-05	2.55424	up
WBGene00009532	ccch-1	2526	3088	2952	13890	13141	12453	27.9407	29.8669	27.0949	133.288	118.296	114.193	1.99803e-172	1.85466	up
WBGene00001604	gln-3	10810	11156	12888	28430	31864	31227	209.366	189.679	208.342	477.381	502.996	501.336	4.34547e-86	1.04453	up
WBGene00010790	sodh-1	13210	10937	12596	52415	58909	53710	280.913	203.809	223.077	972.631	1026.81	953.906	3.7995e-39	1.78966	up
WBGene00006602	tps-1	2959	2969	3134	9381	9932	9456	18.8191	16.5738	16.5762	52.0826	51.7238	50.2065	7.71581e-101	1.31328	up
WBGene00006603	tps-2	3601	3953	4515	10901	11120	9387	27.0142	25.1413	27.2393	69.9776	67.6013	57.4902	3.25985e-51	1.03302	up
WBGene00007072	ugt-1	43	70	62	197	228	181	0.687156	0.985953	0.824712	2.76156	3.0013	2.43274	7.29416e-07	1.38402	up
WBGene00019730	asns-2	3265	3032	3851	46130	47627	48826	45.6508	37.1582	44.8513	563.055	546.06	570.398	0	3.4575	up
WBGene00013898	ZC443.3	418	488	516	4328	4309	3632	7.43678	7.61818	7.64817	67.2856	62.9181	54.0372	9.29621e-190	2.7499	up
WBGene00019211	H18N23.2	2479	2843	3187	9747	9777	9878	37.0779	37.4635	39.7568	127.501	120.516	124.278	8.01672e-138	1.44352	up
WBGene00003778	nnt-1	181	169	333	5561	6030	5350	1.5603	1.273	2.38779	41.8339	42.6097	38.5172	1.34521e-54	4.1138	up
WBGene00020007	R11F4.1	2387	2352	3055	11871	12245	10913	34.2245	29.5783	36.6125	150.245	145.067	131.229	1.14627e-138	1.81876	up
WBGene00013284	daf-22	1616	1893	2088	4702	4826	5111	33.5767	34.4717	36.1345	85.2933	82.2215	88.7271	2.01222e-49	1.04171	up
WBGene00018393	msra-1	1151	985	1236	3799	3656	3674	45.2908	34.2969	40.9091	130.38	118.099	121.408	4.92459e-48	1.36576	up
WBGene00007363	stdh-1	526	658	553	2001	1969	1353	13.1626	14.4415	11.5382	43.7575	40.4381	28.3119	4.27203e-18	1.25064	up
WBGene00002981	lgg-2	2398	2639	2663	16976	16730	14488	64.0226	61.8136	59.2863	396.178	366.938	323.74	3.26165e-252	2.29174	up
WBGene00007886	ethe-1	125	112	97	553	686	662	4.04529	3.17791	2.63422	15.7183	18.3324	18.0264	2.80532e-28	2.10175	up
WBGene00001439	fkh-7	2554	2876	3048	7957	8527	6610	26.1279	27.0228	28.1108	65.4461	72.6786	51.4994	1.00521e-42	1.09526	up
WBGene00001564	icl-1	9247	8592	11497	120606	134417	101238	80.9243	64.881	82.1939	917.784	950.552	726.572	5.58283e-113	3.21583	up
WBGene00008205	sams-1	28104	30424	31950	17784	18020	19808	393.384	373.296	373.048	225.187	208.427	241.149	4.6584e-83	-1.04721	down
WBGene00000870	cyd-1	1722	2293	2628	1404	1293	1439	23.7926	29.75	30.2406	16.9438	14.6965	16.621	7.59788e-23	-1.01176	down
WBGene00006724	ubh-4	2499	2906	3046	1412	1459	1667	64.016	65.2318	64.981	31.5551	30.6194	35.645	3.39786e-49	-1.23586	down
WBGene00012361	mrpl-12	3361	3635	4066	2209	2258	2235	143.255	135.782	144.316	82.165	78.8645	79.5452	1.01181e-59	-1.06512	down
WBGene00001843	hgo-1	4942	5545	5703	1907	2023	1912	90.6541	89.1382	87.1211	30.523	30.4102	29.2822	9.02578e-192	-1.81324	down
WBGene00000915	hsp-90	94230	96172	106032	58399	61742	57888	1169.83	1046.17	1096.83	632.635	624.478	600.454	3.77656e-121	-1.08266	down
WBGene00003159	mcm-7	2681	2941	3199	1524	1747	1602	30.4188	29.2501	30.2295	15.0885	16.2507	15.1765	1.67147e-59	-1.1986	down
WBGene00011844	T19C9.8	203	209	245	61	135	103	5.02343	4.5393	5.06588	1.32258	2.75052	2.12514	1.90373e-07	-1.42123	down
