# Supplementary material for: Transcriptome Analysis of the Nematodes Caenorhabditis elegans and Litoditis marina in Different Food Environments
Source: MDPI journal article supplement (doi:10.3390/jmse10050580), 2022-04-25
Supplement: s1 [file s1 › Supplementary File S6.xlsx]

## Sheet: Sheet1
gene ID	gene name	N2-OP501_Count	N2-OP502_Count	N2-OP503_Count	N2-CeMM1_Count	N2-CeMM2_Count	N2-CeMM3_Count	N2-OP501_FPKM	N2-OP502_FPKM	N2-OP503_FPKM	N2-CeMM1_FPKM	N2-CeMM2_FPKM	N2-CeMM3_FPKM	FDR	log2FC	regulated	WBGene00022645
WBGene00005002	spp-17	6777	8358	8272	625	725	809	512.945	554.551	521.609	41.2255	44.8994	51.1253	0	-3.76758	down	WBGene00009237
WBGene00010896	M28.5	20853	25422	23331	4668	4769	5282	1114.57	1190.76	1038.55	217.688	208.934	235.762	0	-2.58148	down	WBGene00010266
WBGene00009221	acs-2	997	973	1317	52726	62389	50447	13.3509	11.4159	14.6851	616.275	684.972	564.344	0	5.29072	up	WBGene00007867
WBGene00009691	F44E5.4	9123	9493	9911	1017	1102	1014	120.231	109.634	108.768	11.6868	11.8954	11.1587	0	-3.52756	down	WBGene00004020
WBGene00009692	F44E5.5	9183	9464	9878	1018	1085	1044	121.245	109.501	108.616	11.7196	11.7323	11.5124	0	-3.52118	down	WBGene00017594
WBGene00021595	Y46E12BL.2	8866	9560	10021	2570	2682	2671	58.8489	55.6076	55.3954	14.8828	14.5925	14.8062	0	-2.18771	down	WBGene00008132
WBGene00016653	ssb-1	14055	15592	16627	5102	5680	5276	276.744	268.991	272.652	87.6628	91.6764	86.7381	0	-1.87056	down	WBGene00008584
WBGene00009982	F53F1.4	25995	33799	34529	5855	5456	5627	1360.65	1550.35	1505.15	267.404	234.07	245.953	0	-2.8101	down	WBGene00010123
WBGene00020909	W01A11.1	970	1049	1028	7804	7811	7538	18.965	17.9647	16.7391	133.124	125.134	123.048	0	2.56968	up	WBGene00008565
WBGene00019510	nucl-1	46329	50568	54517	11972	13094	13221	478.243	457.454	468.687	107.836	110.778	113.981	0	-2.32688	down
WBGene00015814	oatr-1	11867	13229	14316	2635	2730	2987	229.354	223.113	229.641	44.4185	43.2185	48.1751	0	-2.5777	down
WBGene00002077	imb-3	36458	37972	40912	12486	12966	13175	273.133	249.291	255.252	81.6244	79.6178	82.4318	0	-1.92363	down
WBGene00019978	hacd-1	1219	1073	1433	22286	23633	24299	33.1293	25.5722	32.4392	528.853	526.796	551.901	0	3.87663	up
WBGene00018269	acs-11	1090	1107	1216	13562	13899	12470	18.2095	16.2066	16.8809	197.448	190.139	173.769	0	3.19233	up
WBGene00019730	asns-2	3265	3032	3851	46130	47627	48826	45.6508	37.1582	44.8513	563.055	546.06	570.398	0	3.4575	up
WBGene00010303	cri-3	14559	15338	16838	3817	3922	3796	450.777	415.906	433.885	102.752	99.7058	97.861	0	-2.36168	down
WBGene00008412	D2030.2	1656	1891	2245	14626	14875	13211	22.3275	22.9665	26.0632	175.066	167.121	151.17	0	2.53444	up
WBGene00022816	fbn-1	16793	19177	24023	3579	3409	3419	53.5764	53.5497	63.7932	9.94868	8.89224	9.07077	0	-2.85627	down
WBGene00000722	col-149	14985	17812	22366	1776	2033	1751	397.425	413.973	493.987	41.0862	44.1788	38.7701	0	-3.6348	down
WBGene00021248	Y22D7AL.10	11933	12410	12772	3335	3338	3204	587.463	536.231	523.483	143.302	134.843	131.589	0	-2.25481	down
WBGene00018543	ugt-32	110	81	94	5491	6120	5941	1.92328	1.2362	1.35946	84.0739	88.0121	87.0542	0	5.54834	up
WBGene00021088	W08E12.7	28832	31117	34909	11349	12097	11592	424.603	401.489	428.107	145.787	145.967	142.512	0	-1.77999	down
WBGene00000273	brp-1	5916	6806	7388	28066	30431	29517	91.164	91.8883	94.7983	377.327	384.3	379.831	0	1.78336	up
WBGene00016877	C52D10.3	3672	4189	4317	100	110	72	50.0547	50.2719	48.9818	1.18185	1.22971	0.811249	0	-5.73164	down
WBGene00018461	F45D11.16	3150	3743	4357	44031	45877	42727	58.1253	60.5305	66.9662	709.088	693.992	658.572	0	3.21296	up
WBGene00010627	nol-56	23011	24481	25945	8751	9240	9194	395.042	368.294	370.931	131.088	130.014	131.817	0	-1.7792	down
WBGene00006366	sym-1	19179	22404	26987	4654	5232	4906	221.92	227.181	260.056	46.9839	49.6172	47.4051	0	-2.54603	down
WBGene00016119	C25H3.10	126	138	122	4336	4507	3867	3.31747	3.1732	2.67932	102.877	100.136	87.4324	0	4.65568	up
WBGene00021876	Y54G2A.11	905	922	906	11428	11259	10105	14.2851	12.8113	11.9016	157.6	145.597	133.439	0	3.22262	up
WBGene00017075	nap-1	42683	46943	47680	16880	17377	17002	884.662	852.635	823.009	305.281	295.209	294.302	0	-1.76729	down
WBGene00002005	hsp-1	106560	111953	124105	39892	43610	43314	1438.41	1324.32	1395.1	469.852	482.454	488.295	0	-1.77868	down
WBGene00012140	T28F4.5	1995	1910	2555	23945	26781	21780	80.6448	72.8005	87.5548	920.206	975.206	782.519	0	3.13218	up
WBGene00017659	F21C10.10	490	495	636	21364	24541	19655	15.6312	14.6147	17.2926	615.263	663.546	543.27	0	4.97335	up
WBGene00020915	nol-58	26390	28517	29851	7563	8006	8290	409.999	388.249	386.225	102.528	101.947	107.564	0	-2.17315	down
WBGene00018460	F45D11.15	2301	3028	3161	30528	31655	29611	42.4557	48.9591	48.5814	491.623	478.85	456.408	0	3.08727	up
WBGene00001500	ftn-1	276	301	321	7482	9073	8811	11.6543	11.1346	11.2596	275.759	314.101	310.816	0	4.45186	up
WBGene00004068	pnk-1	1777	2141	2368	18050	18546	17724	32.6679	33.397	36.2407	290.285	280.879	273.037	0	2.7642	up
WBGene00009973	F53C11.3	878	964	1040	7848	8433	8370	22.1646	21.3243	21.884	173.029	174.648	176.615	0	2.74371	up
WBGene00002238	kars-1	19912	21216	23482	7421	7564	7615	280.407	261.553	275.44	91.1108	86.9939	89.8566	0	-1.8588	down
WBGene00001395	fat-3	8891	9476	10138	40283	40850	38651	165.624	154.661	157.223	655.004	623.786	601.382	3.70921e-300	1.7217	up
WBGene00001169	eef-1A.2	167165	182617	200087	80690	84322	84975	2497.5	2336.26	2415.99	1020.86	1002.09	1028.95	4.93676e-292	-1.48111	down
WBGene00018459	F45D11.14	584	890	943	9684	10429	9705	10.6287	14.1812	14.2897	153.796	155.588	147.525	4.96603e-292	3.27293	up
WBGene00002083	inf-1	39252	42768	45997	13930	15135	15839	677.565	653.433	662.886	210.052	214.128	226.644	2.32963e-291	-1.85491	down
WBGene00021469	Y39G10AR.11	2638	2659	3004	15561	15338	14810	28.2374	24.9616	26.7636	145.376	134.564	132.502	4.56139e-290	2.10977	up
WBGene00010738	K10D3.4	21786	26882	31861	6335	6649	6143	176.945	191.336	215.515	44.8934	44.265	41.6659	3.45399e-289	-2.40479	down
WBGene00019322	ahcy-1	73575	79777	85595	28108	30282	31591	1328.16	1258.04	1282.86	439.141	445.224	476.39	3.60543e-286	-1.75316	down
WBGene00008538	sqrd-1	186	241	263	3489	3438	3538	3.35409	3.79419	3.98618	55.7005	51.2817	53.579	6.15539e-282	3.56008	up
WBGene00002025	hsp-60	17668	20922	23170	5049	5620	5965	232.958	241.776	254.406	58.0597	60.7453	65.6746	1.1156e-280	-2.2291	down
WBGene00010778	gpdh-2	3061	3362	3940	17277	19129	19187	61.748	59.1002	65.8664	300.831	312.659	320.038	2.02832e-277	2.07587	up
WBGene00001423	fib-1	44227	51720	55831	10286	12103	13211	991.38	1011.1	1043.46	196.935	218.333	237.056	2.92948e-276	-2.42877	down
WBGene00001226	eif-3.C	22051	23951	25965	8276	9424	9063	201.339	191.641	197.44	65.9382	70.525	69.1117	3.72588e-274	-1.77125	down
WBGene00002244	laf-1	11243	12369	13047	4159	4586	4448	85.4955	82.423	82.6255	27.5971	28.5793	28.2431	2.31585e-272	-1.81846	down
WBGene00016250	hsp-110	17585	18047	19870	6137	6735	6613	181.183	162.923	170.465	55.1615	56.8482	56.8883	3.17255e-272	-1.85542	down
WBGene00002010	hsp-6	23981	26107	28518	11074	11474	11491	271.609	259.12	268.99	109.442	106.516	108.69	3.7793e-272	-1.5512	down
WBGene00018898	F55F10.1	17944	19217	20186	7317	7874	7521	37.3203	36.1657	35.5301	13.3545	13.665	13.125	5.26467e-269	-1.68211	down
WBGene00001758	gst-10	4126	5041	5585	862	935	988	147.929	158.42	166.775	26.952	27.4447	29.5748	1.57214e-265	-2.7353	down
WBGene00000169	aqp-1	2896	2766	3362	16662	17942	16842	80.3188	67.2737	77.6372	402.372	406.207	389.671	4.16109e-265	2.15864	up
WBGene00008490	F01D4.8	232	171	221	4018	4020	4395	4.95882	3.205	3.93343	75.0067	70.4994	78.5284	3.76513e-264	3.93361	up
WBGene00013181	Y53H1B.2	958	1086	1113	8815	10431	8194	34.8817	34.6645	33.75	280.188	311.43	249.277	9.55156e-264	2.76096	up
WBGene00010478	K01G5.5	19628	21666	23407	6055	6977	7175	362.959	351.107	360.468	97.6936	105.752	110.799	2.24221e-263	-2.02093	down
WBGene00012964	Y48A6B.3	5606	6243	6304	1556	1743	1628	252.121	246.02	236.09	61.0615	64.2335	61.1339	6.63194e-263	-2.22407	down
WBGene00009237	F28H7.3	4910	4947	5254	828	1019	851	132.09	116.624	117.715	19.4348	22.4548	19.1041	2.84571e-262	-2.82572	down
WBGene00000931	dao-5	16261	17611	18690	7300	7503	7307	142.969	135.685	136.78	55.8967	54.0615	53.6886	2.86428e-258	-1.59412	down
WBGene00009439	mlcd-1	507	471	549	6079	7546	5820	9.49748	7.76099	8.58511	99.8813	116.299	91.7311	9.01915e-257	3.30046	up
WBGene00002981	lgg-2	2398	2639	2663	16976	16730	14488	64.0226	61.8136	59.2863	396.178	366.938	323.74	3.26165e-252	2.29174	up
WBGene00000067	act-5	50388	56932	62326	23924	26102	25854	1096.61	1086.48	1128.23	454.172	465.62	469.858	8.86926e-248	-1.50324	down
WBGene00016013	ugt-66	450	483	430	5235	5513	6347	7.34408	6.91936	5.84229	74.6726	73.879	86.6547	7.04987e-246	3.27798	up
WBGene00012538	semo-1	459	733	633	6870	7481	7057	8.5541	11.9749	9.83171	112.287	114.452	110.011	4.11189e-245	3.19358	up
WBGene00021073	nsun-1	8748	9727	11020	3389	3623	3558	109.553	106.615	114.812	36.984	37.144	37.1558	5.20532e-243	-1.82078	down
WBGene00011059	R06C1.4	28711	32354	29538	8892	9671	9583	1662.47	1641.73	1424.42	449.248	458.991	463.398	1.05408e-238	-2.0332	down
WBGene00006626	tsn-1	17616	19581	22130	8366	8684	8415	160.744	156.573	168.169	66.6115	64.9455	64.1281	9.00199e-238	-1.56151	down
WBGene00011408	nifk-1	4719	5274	5288	1099	1230	1290	122.678	120.165	114.499	24.927	26.1942	27.9989	2.21308e-236	-2.41812	down
WBGene00016407	unk-1	2771	3004	3009	16505	16717	14652	21.6201	20.8537	19.7927	112.363	107.245	95.3986	5.93168e-235	2.0922	up
WBGene00006608	tre-2	1479	1831	2062	9869	10450	9939	19.1305	20.6942	22.1467	110.964	110.39	116.563	7.87144e-233	2.14784	up
WBGene00016235	C29H12.2	8169	8822	9930	2718	3035	3066	149.043	141.02	150.717	43.2052	45.3832	46.7164	1.83703e-232	-1.95111	down
WBGene00000550	clu-1	16365	16797	18769	6928	6982	6673	103.258	92.8769	98.622	38.1415	36.1073	35.1594	1.39459e-230	-1.67956	down
WBGene00006956	wrt-10	8521	10585	13088	2230	2356	2156	217.272	236.522	277.918	49.6035	49.2307	45.8956	1.84257e-230	-2.58107	down
WBGene00020382	T09B4.8	8716	8561	9333	2507	2407	2236	165.8	142.722	147.859	41.6141	37.5228	35.5191	2.69191e-228	-2.23909	down
WBGene00004302	ran-1	21281	23927	24933	9707	10800	10418	616.773	607.705	601.782	245.475	256.555	252.158	4.14226e-227	-1.52606	down
WBGene00000381	cct-6	14993	16570	17686	7413	7675	7551	218.542	211.62	214.67	94.248	91.6966	91.9032	5.93291e-227	-1.46528	down
WBGene00016845	C50F7.5	120	90	92	2995	4015	3017	3.26567	2.14139	2.08705	71.4887	90.0197	68.9127	5.84802e-224	4.63307	up
WBGene00016630	acer-1	19907	20495	23263	77883	85571	76955	352.506	317.953	343.147	1202.67	1242.03	1137.76	1.62557e-222	1.56725	up
WBGene00015057	gad-3	276	271	278	3509	3984	3229	1.98747	1.71209	1.66998	22.1122	23.5813	19.4742	2.03577e-222	3.32635	up
WBGene00021899	Y54H5A.1	6704	7457	8020	2543	2532	2669	114.854	111.97	114.451	38.0122	35.5537	38.1938	4.16619e-222	-1.85915	down
WBGene00020269	erfa-1	16217	18382	19486	7496	7750	8066	225.745	225.871	226.408	90.5403	85.7262	92.0815	2.94113e-220	-1.55674	down
WBGene00007000	tufm-1	19830	21284	22780	9895	9921	9770	319.865	301.638	305.588	139.012	130.979	130.334	1.82131e-216	-1.4556	down
WBGene00006924	vig-1	91542	101264	107790	41596	44508	46900	1384.77	1341.26	1360.17	548.727	551.624	592.005	2.80968e-215	-1.52019	down
WBGene00015660	catp-3	325	310	281	4610	4904	3895	2.67923	2.24056	1.92977	33.2264	33.1972	26.8653	5.12869e-215	3.48944	up
WBGene00002980	lgg-1	6171	6367	6988	28602	30357	26295	242.221	219.03	228.452	979.78	976.813	862.088	1.2201e-213	1.77462	up
WBGene00016894	C53B7.3	3136	3623	3513	14460	16368	15402	102.667	104.046	94.7298	416.464	442.581	423.486	5.76527e-213	1.81808	up
WBGene00002253	lbp-1	735	813	668	6339	6891	6532	34.2355	32.7799	25.3099	254.846	260.181	242.092	1.81533e-212	2.78893	up
WBGene00019537	K08D12.3	28086	31290	31607	9599	9823	11212	1187.44	1163.19	1114.26	358.057	342.421	400.125	1.33842e-211	-1.91315	down
WBGene00019168	H06I04.3	11169	11904	12704	4588	4331	4529	112.87	105.43	106.901	40.502	35.8852	38.2501	1.55064e-211	-1.75475	down
WBGene00000883	cyn-7	27492	29708	31213	13123	14501	13801	1075.18	1023.33	1000.93	446.953	451.092	441.389	1.3278e-210	-1.43994	down
WBGene00009334	F32D8.12	1671	1440	1718	10870	11298	10579	28.1581	21.2924	24.0778	159.581	155.823	148.894	2.70862e-208	2.40064	up
WBGene00019492	K07E3.4	3515	3660	3969	14421	15718	15631	44.7274	40.813	42.0743	160.197	163.953	166.188	6.61137e-208	1.68703	up
WBGene00020156	T02B11.4	487	434	582	4351	4878	4489	20.0189	15.625	19.9101	156.09	164.383	154.115	1.11769e-207	2.82857	up
WBGene00012714	abce-1	12528	12639	14379	5113	5228	5257	156.561	138.415	149.653	55.7482	53.5528	54.8647	2.10031e-207	-1.68629	down
Caenorhabditis_elegans_newGene_1276	-	308	287	348	3052	3555	3388	5.14035	4.16379	4.72673	44.3993	48.7309	46.953	1.17235e-206	3.03916	up
WBGene00016594	C42D4.1	2324	2277	2733	15144	15672	13069	73.4261	63.4254	72.0061	419.665	408.097	346.355	2.73175e-205	2.22694	up
WBGene00003982	pes-9	12247	12878	13904	5569	5806	5474	218.135	201.012	208.254	86.9107	84.4129	81.9719	4.5895e-205	-1.55713	down
WBGene00022046	Y66H1A.4	10765	12694	12597	3007	3812	3572	302.474	312.569	294.786	73.6974	85.7802	83.7467	2.13233e-203	-2.13605	down
WBGene00012144	T28H10.3	829	850	1237	9910	10596	8531	14.7146	13.2258	18.2827	153.571	154.236	126.529	2.85406e-203	2.96005	up
WBGene00001993	hpd-1	8529	9238	10863	2431	2512	2904	171.402	162.683	181.812	42.6302	41.3791	48.7335	3.15022e-203	-2.20282	down
WBGene00010456	K01C8.1	2696	3080	2947	575	628	559	46.2061	45.3787	42.0974	8.19112	8.76958	7.11217	9.78309e-203	-2.64428	down
WBGene00001029	dnj-11	7192	7603	8367	2373	2321	2619	97.0762	89.9287	94.0566	27.9509	25.6707	29.5244	2.90949e-201	-2.0037	down
WBGene00021768	Y51F10.7	8484	9361	10179	3188	3041	3409	297.73	287.886	297.47	97.6059	87.4478	99.9105	1.30053e-200	-1.87969	down
WBGene00017262	F08F3.4	2362	2719	2545	295	399	320	50.7225	51.1792	45.5132	5.51256	7.0126	5.72906	4.97819e-200	-3.23888	down
WBGene00021351	eif-2alpha	11439	12474	13577	5291	5096	5312	205.646	196.511	203.265	82.9948	75.0871	79.7535	1.452e-199	-1.59806	down
WBGene00018465	F45E1.4	450	441	396	4083	4239	4203	12.0255	10.3244	8.8098	95.294	92.9304	93.8963	8.03801e-197	2.91156	up
WBGene00003062	lpd-6	7816	8726	9461	2466	2922	2963	117.932	115.375	118.889	32.4587	36.1325	37.3342	5.77802e-193	-1.97906	down
WBGene00012261	lpr-3	14684	18905	22610	5058	4838	4855	197.443	222.761	253.19	59.3467	53.3174	54.5167	1.47077e-192	-2.25595	down
WBGene00001843	hgo-1	4942	5545	5703	1907	2023	1912	90.6541	89.1382	87.1211	30.523	30.4102	29.2822	9.02578e-192	-1.81324	down
WBGene00013898	ZC443.3	418	488	516	4328	4309	3632	7.43678	7.61818	7.64817	67.2856	62.9181	54.0372	9.29621e-190	2.7499	up
WBGene00008944	F19B2.5	6705	6715	7180	1965	2123	2236	119.152	104.861	105.958	30.3858	30.8376	33.6894	8.58313e-189	-2.04782	down
WBGene00016422	noah-1	22365	28055	35965	7100	7448	7175	165.219	181.621	221.27	45.7653	45.0899	44.2607	2.47129e-188	-2.31606	down
WBGene00006617	tars-1	15113	16088	16868	7134	7499	7530	173.974	169.369	168.832	74.9138	73.9171	72.617	5.18025e-187	-1.46292	down
WBGene00008781	rpoa-2	5722	6543	6598	2045	1920	2132	42.4612	42.5541	40.7781	13.2426	11.676	13.2095	8.95575e-185	-1.96934	down
WBGene00021276	Y23H5B.5	6115	5777	6452	1796	1793	1728	75.0321	62.1162	65.9276	19.2302	18.0335	17.707	1.54694e-184	-2.13032	down
WBGene00044737	ttr-45	524	712	642	4424	4656	4433	21.4364	25.5283	21.8747	157.993	156.211	151.54	1.64636e-184	2.49157	up
WBGene00008436	DH11.2	319	275	254	4026	4322	3541	5.74716	4.34583	3.81282	63.4768	64.0195	53.4413	4.60216e-184	3.42135	up
WBGene00017834	F26F12.3	4155	4603	5207	21318	20760	18586	32.4151	32.0018	34.5912	154.957	139.423	122.927	1.51163e-183	1.77167	up
WBGene00006705	ubc-8	460	434	450	3857	3740	3616	15.3376	12.6838	12.4767	112.275	102.262	100.762	9.89802e-183	2.69514	up
WBGene00015941	C18A3.3	4837	5578	5482	1722	1875	1834	112.784	113.961	106.439	35.0204	35.8307	35.6961	5.58681e-182	-1.89193	down
WBGene00009926	noah-2	18367	23010	28958	6258	6553	6178	199.645	219.183	262.14	59.3502	58.3763	56.0824	1.03042e-181	-2.21527	down
WBGene00001227	eif-3.D	13372	14278	15552	6692	7237	6951	205.791	192.561	199.326	89.8593	91.2895	89.3296	2.1278e-181	-1.39395	down
WBGene00017691	ilys-5	2600	3392	3450	383	482	534	134.011	153.215	148.095	17.226	20.3185	22.941	3.47302e-181	-3.07474	down
WBGene00014001	pyk-2	2069	2103	2380	9235	9554	8968	34.0888	30.3535	32.6788	134.889	130.579	125.18	3.74151e-181	1.73191	up
WBGene00077761	zip-9	2192	2037	2270	11563	11262	12115	63.9271	52.0479	55.1307	294.261	269.204	295.069	4.17002e-181	2.06951	up
WBGene00004014	phb-1	15886	16681	17769	7111	7709	7763	409.582	376.897	381.534	159.978	162.914	167.156	5.85939e-181	-1.50231	down
WBGene00019380	K04C2.2	6693	6953	7296	2427	2351	2514	59.4311	54.0949	53.9371	18.7747	17.0996	18.6363	5.92319e-181	-1.86562	down
WBGene00016607	C43E11.9	3938	4082	4073	835	996	996	162.389	147.491	139.871	30.0261	33.6516	34.2815	8.65267e-180	-2.438	down
WBGene00013766	prmt-1	20981	23481	23394	10762	11316	11091	456.294	447.515	423.706	204.221	201.715	201.441	2.98851e-179	-1.37873	down
WBGene00004182	prk-1	1242	1271	1350	7105	7057	6395	16.7392	15.1215	15.1823	83.0545	77.5347	71.5835	3.8091e-178	2.05672	up
WBGene00014697	cyp-25A3	158	177	189	2365	2190	2104	2.81266	2.76249	2.79887	36.8259	32.0355	31.3541	1.06912e-176	3.29567	up
WBGene00022599	daf-41	11379	12204	13664	5641	6035	5941	431.78	403.442	432.701	187.135	187.891	188.055	7.52748e-176	-1.42354	down
WBGene00012825	Y43F8C.3	621	783	902	4926	4995	4728	6.75491	7.45751	8.16286	46.7534	44.5324	42.9521	7.87297e-173	2.31854	up
WBGene00009532	ccch-1	2526	3088	2952	13890	13141	12453	27.9407	29.8669	27.0949	133.288	118.296	114.193	1.99803e-172	1.85466	up
WBGene00008028	scl-6	1403	1310	1297	56	27	47	51.0915	41.818	39.3426	1.75506	0.798608	1.42177	1.5735e-171	-5.18487	down
WBGene00003795	npp-9	12112	13803	14840	6641	6956	6895	113.53	113.337	115.792	54.3638	53.436	53.8466	1.77053e-171	-1.33442	down
WBGene00008040	ttr-5	756	890	853	4624	5336	5341	44.2272	45.5992	41.5203	236.092	255.887	260.983	5.3064e-171	2.25747	up
WBGene00001591	glc-1	105	166	204	2600	2909	2453	1.75031	2.40834	2.84449	38.0498	39.8987	34.1935	2.20083e-170	3.69194	up
WBGene00077526	C25A1.16	9771	10645	10737	4429	4281	4371	426.18	406.87	390.119	168.572	152.937	159.187	7.20807e-170	-1.59661	down
WBGene00003415	mars-1	10799	11769	12618	5308	5652	5731	105.393	107.567	107.338	44.9279	44.7482	47.6767	8.94293e-169	-1.42008	down
WBGene00017163	dnpp-1	10189	11023	11768	4029	4546	4679	178.99	169.511	171.725	61.7719	65.6713	68.9958	9.51947e-169	-1.65886	down
WBGene00016266	idhg-2	1310	1430	1482	6345	6757	6095	25.2672	24.1641	23.7973	106.791	106.821	98.1755	5.30759e-168	1.83238	up
WBGene00002021	hsp-17	3321	3774	3529	867	980	942	120.276	124.917	106.03	27.4016	28.8236	27.9957	1.54676e-167	-2.27022	down
WBGene00022235	sqd-1	72733	76321	83436	42177	41559	40764	1003.55	927.407	955.732	505.81	469.445	471.021	2.43842e-166	-1.24626	down
WBGene00022645	ZK6.11	2886	2721	3297	668	723	661	57.2949	47.3078	54.4915	12.8704	11.7514	12.146	4.92559e-165	-2.45366	down
WBGene00018294	atg-18	1920	1757	2102	9190	9724	9308	30.9177	24.8283	28.1948	129.793	128.847	125.692	7.46789e-165	1.93252	up
WBGene00009084	F23B12.7	7319	7962	8344	3528	3664	3472	68.4582	65.3444	65.1007	28.7851	28.0978	27.1547	5.10661e-164	-1.49214	down
WBGene00017154	ugt-57	4302	4452	5622	1360	1412	1244	61.4105	55.6846	66.8339	16.9356	16.5147	14.8249	2.70273e-163	-2.17385	down
WBGene00019543	cif-1	10284	10809	11824	4929	5399	5166	191.776	176.653	184.752	78.4757	73.3406	80.1911	9.45435e-163	-1.43229	down
WBGene00014016	ZK632.9	1953	2156	2257	7821	8317	8289	116.729	112.92	112.314	407.903	407.442	413.748	9.52609e-163	1.59007	up
WBGene00000673	col-98	12923	14036	16184	47137	53583	54100	323.009	307.424	336.865	1028.09	1097.76	1129.33	3.3459e-162	1.49627	up
WBGene00020391	cct-7	14001	15218	16551	8058	8337	8119	200.149	190.569	196.947	100.422	96.5945	96.9463	4.83399e-161	-1.24506	down
WBGene00012999	rpoa-1	8738	9393	10206	3586	4083	4110	45.1239	42.6085	43.9632	16.5898	17.7792	17.9173	8.4358e-159	-1.61	down
WBGene00000984	dhs-21	547	756	681	4396	4409	4710	16.8865	20.4385	17.5039	118.464	111.604	121.461	2.932e-158	2.41317	up
WBGene00002007	hsp-3	46522	53099	59693	28156	29959	29079	551.66	549.806	585.001	294.719	292.272	287.509	3.18231e-158	-1.21078	down
WBGene00016201	tdo-2	6468	7426	8163	3062	3360	3093	135.424	136.163	142.843	56.0202	57.6805	54.2115	3.58045e-158	-1.55358	down
WBGene00016332	C32F10.4	744	726	686	5160	5005	4774	19.9764	17.0645	15.3392	120.902	110.146	107.048	5.94693e-158	2.42704	up
WBGene00021934	cct-8	10481	11444	11776	5131	5445	4892	122.896	117.593	114.993	52.525	52.3454	47.9206	1.1656e-157	-1.46897	down
WBGene00003610	nhr-11	202	177	291	2650	3070	3071	3.80216	2.8997	4.545	43.6938	47.8761	48.2063	1.17275e-157	3.34009	up
WBGene00021466	eif-2gamma	11360	12321	13671	6119	6596	6390	186.491	177.258	186.914	87.6485	88.7587	87.6074	7.67845e-156	-1.31085	down
WBGene00020672	T22B7.3	106	120	140	1626	2023	1959	3.05653	3.04186	3.37408	41.2692	48.2431	47.6065	6.30391e-155	3.55308	up
WBGene00002073	ima-2	3370	3900	4234	1146	1310	1291	51.798	52.5351	54.2038	15.3669	16.5014	16.5627	1.67035e-154	-1.95586	down
WBGene00013311	sec-61.A	29330	34736	37355	16919	17582	18121	381.829	396.31	405.008	192.197	187.607	197.049	5.64534e-153	-1.28724	down
Caenorhabditis_elegans_newGene_776	-	1263	1418	1389	154	191	181	28.7062	28.2445	26.3043	3.04034	3.55427	3.42481	3.53723e-152	-3.26981	down
WBGene00004258	pyc-1	7618	7538	9434	36000	39813	32778	54.4788	47.2511	56.1844	224.489	233.261	195.695	5.34433e-152	1.79212	up
WBGene00012257	lpr-4	7297	9620	11540	2622	2516	2538	146.01	168.678	192.306	45.7803	41.2548	42.3994	7.96022e-151	-2.21394	down
WBGene00004015	phb-2	15535	16199	16954	6730	7286	7618	379.473	347.241	344.619	143.55	146.193	155.58	1.0892e-150	-1.51651	down
WBGene00019162	eif-1.A	18246	20061	21714	9818	10223	10758	530.468	511.11	525.74	249.075	243.599	261.213	2.08384e-150	-1.30601	down
WBGene00012255	lpr-6	5672	6880	8144	1831	1688	1404	126.528	144.69	151.296	35.6382	30.851	26.1575	7.69641e-150	-2.39665	down
WBGene00019719	M01H9.3	2800	3061	3258	12474	12980	11105	66.9545	65.9519	66.899	264.897	256.65	226.175	1.58066e-149	1.65248	up
WBGene00012676	pro-3	5437	5627	6402	2282	2323	2417	52.1224	47.2717	51.117	19.0874	18.2501	19.3512	2.78529e-149	-1.65648	down
WBGene00012256	lpr-5	8206	10466	12284	3274	2956	3006	105.541	117.956	131.573	36.7362	31.1577	32.285	4.71297e-148	-2.07172	down
WBGene00019819	aass-1	10623	11595	13206	5453	5908	5886	95.3917	91.2124	98.6909	42.7262	43.4826	44.1439	1.20999e-147	-1.38025	down
WBGene00021497	Y40C5A.4	1561	1853	1928	7174	7274	6801	18.9638	19.559	19.5182	75.601	72.2744	68.6918	1.55358e-147	1.6439	up
WBGene00007681	C18D11.3	6625	6821	7041	2395	2519	2701	139.816	126.138	123.747	44.2033	46.0354	47.6044	1.3291e-146	-1.77273	down
WBGene00010015	atad-3	6664	7028	7777	2271	2031	2490	88.9566	82.2139	86.4577	26.4439	22.2228	27.7526	2.07586e-146	-1.99786	down
WBGene00011003	R04B5.5	171	223	218	1926	2281	2066	4.17755	4.77321	4.4483	41.2088	45.8461	42.3138	3.07667e-146	2.98786	up
WBGene00001387	far-3	205	141	195	7794	9112	8867	8.40753	5.0667	6.68088	280.044	307.514	304.93	3.7474e-146	5.09026	up
WBGene00014095	gdh-1	73542	80590	84743	47949	49143	49208	1053.09	1011.29	1010.59	599.136	576.797	588.487	6.44122e-146	-1.05292	down
WBGene00010174	F56H9.2	1763	2085	2027	8128	9504	9685	148.885	154.017	142.271	597.562	656.231	681.684	7.23567e-146	1.8639	up
WBGene00011292	allo-1	1138	1284	1308	6048	5820	5445	23.7602	23.4959	22.7461	110.194	99.6127	94.9346	8.95456e-146	1.86266	up
WBGene00002152	iars-1	15153	15758	17157	8408	8615	8244	110.716	100.894	104.397	53.6025	51.5888	50.3051	1.48053e-144	-1.27362	down
WBGene00021427	sec-61.B	4890	5546	5889	2123	2344	2349	319.736	317.809	320.714	121.108	125.617	128.266	2.53704e-143	-1.60164	down
WBGene00001031	dnj-13	11209	11470	12972	5060	5401	4602	217.306	194.8	209.347	85.132	85.5768	74.311	3.06503e-143	-1.5868	down
WBGene00002066	ifg-1	20019	22439	24383	11550	12761	12487	126.99	122.028	125.777	62.1865	67.0499	67.9885	3.9445e-143	-1.20459	down
WBGene00002850	let-716	10324	10941	11519	5153	4840	4946	52.6755	48.9214	48.9488	22.9423	20.2405	21.0738	4.44374e-143	-1.47815	down
WBGene00000831	ctl-2	755	1027	960	5537	7099	7290	12.8338	15.35	13.2988	80.4123	99.4085	104.099	6.13146e-143	2.50234	up
WBGene00001225	eif-3.B	14539	16284	16924	8835	9230	8973	156.742	153.543	151.656	83.1121	81.4044	80.7837	1.0844e-142	-1.16531	down
WBGene00001231	eif-3.H	8296	8702	9218	4011	4349	4110	158.908	146.073	147.041	67.0278	68.2771	65.7364	2.65261e-142	-1.41811	down
WBGene00001071	dpy-9	6674	8581	10639	2355	2459	2439	173.674	195.689	230.579	53.4682	52.448	53.0036	4.56725e-142	-2.16017	down
WBGene00002265	lec-2	6853	7130	7443	24104	25072	27037	47.2867	122.735	44.0732	262.256	264.965	151.789	5.56451e-142	1.47862	up
WBGene00020446	T12B3.3	2058	2095	2268	8773	9076	8109	47.9728	42.7934	44.0291	178.483	173.446	157.912	6.2644e-142	1.66225	up
WBGene00013577	Y76A2B.5	4571	4734	5311	15154	15535	15366	113.825	103.383	110.337	329.53	317.497	320.002	7.53613e-142	1.30715	up
WBGene00011737	sqst-1	3132	3135	3732	12144	12775	11769	36.0568	31.5904	35.781	122.027	120.302	113.201	1.57766e-141	1.52589	up
WBGene00303011	F17C11.26	1306	1294	1430	5950	6794	6964	54.7915	47.59	49.9946	217.953	233.791	244.183	1.98052e-141	1.93361	up
WBGene00021043	pck-1	10643	12286	12948	34332	37729	38490	142.974	151.585	144.862	420.162	414.675	431.476	7.32062e-141	1.27671	up
WBGene00001069	dpy-7	7488	9700	11981	2748	2855	2744	173.853	197.376	231.666	55.6649	54.3331	53.2108	8.40437e-141	-2.12948	down
WBGene00000379	cct-4	15009	16053	17011	8513	9172	8592	225.118	210.995	212.474	111.402	112.755	107.621	1.04674e-139	-1.21768	down
WBGene00007460	C08F11.13	1021	1047	1334	6100	5937	5514	20.6414	18.6725	22.5055	107.749	98.6959	93.4299	1.1106e-139	2.01694	up
WBGene00007686	tomm-40	9575	10185	11018	4221	4976	4674	202.212	188.491	193.788	77.7821	86.1296	82.4368	2.54771e-139	-1.49477	down
WBGene00003511	mxl-3	4482	4296	5156	18345	20512	17559	123.583	103.803	118.396	441.387	463.575	404.341	2.90443e-139	1.66451	up
WBGene00020007	R11F4.1	2387	2352	3055	11871	12245	10913	34.2245	29.5783	36.6125	150.245	145.067	131.229	1.14627e-138	1.81876	up
WBGene00001209	egl-45	17438	19266	20957	9055	10087	10252	135.077	130.783	135.196	61.2076	64.0424	66.3225	1.54759e-138	-1.31553	down
WBGene00003482	mua-3	14062	17751	20117	6123	7063	6839	39.1804	42.9372	46.4047	14.7236	16.0862	15.7493	2.34126e-138	-1.70877	down
WBGene00011803	T16G12.1	5181	5357	5655	1941	1803	2024	24.6251	22.3149	22.3844	8.04881	7.02164	8.03478	2.47262e-138	-1.83122	down
WBGene00007050	utp-20	5906	6274	6711	2520	2828	2434	20.4629	19.0502	19.365	7.61941	8.03112	7.04221	4.10644e-138	-1.62373	down
WBGene00015141	ugt-46	5642	5712	6616	2476	2411	2306	84.8339	75.6182	83.4807	32.5948	29.5332	29.5327	4.12115e-138	-1.66253	down
WBGene00019211	H18N23.2	2479	2843	3187	9747	9777	9878	37.0779	37.4635	39.7568	127.501	120.516	124.278	8.01672e-138	1.44352	up
WBGene00018803	fbxa-24	299	253	306	2889	2750	2458	5.50027	4.08913	4.69277	46.514	41.599	37.8741	2.11109e-137	2.86491	up
WBGene00019983	sti-1	5684	5657	6157	2004	2348	2190	134.437	117.265	121.283	41.357	45.5119	43.2511	1.2049e-136	-1.76469	down
WBGene00004227	ptr-13	629	564	704	3913	4270	3727	6.0191	4.73208	5.61156	32.6869	33.5085	29.7983	1.33529e-136	2.28955	up
WBGene00001497	fars-1	7161	7727	8215	3710	3742	3834	116.927	110.382	111.341	52.2215	49.6882	48.8747	8.17337e-136	-1.37765	down
WBGene00009993	F53F4.11	11122	11499	12776	5823	6284	6115	168.723	152.886	161.425	77.0895	78.1397	77.4761	2.16254e-135	-1.30331	down
WBGene00008602	oac-14	409	379	457	3189	3666	2890	5.09614	4.13108	4.72331	34.536	37.2888	29.9466	8.07525e-135	2.60131	up
WBGene00007479	C09F9.2	10293	12528	15832	4053	4487	4284	55.7352	59.4462	71.3919	19.1466	19.9141	19.3725	8.92519e-135	-1.92044	down
WBGene00021335	spp-23	3022	3596	3315	494	622	734	212.59	221.731	194.239	30.3283	35.8276	43.1234	1.33656e-133	-2.75248	down
WBGene00000282	cah-4	5860	6376	6877	18740	19549	20503	163.235	155.852	159.688	457.509	447.549	478.279	3.57208e-133	1.27301	up
WBGene00018362	ppm-1.G	7411	8264	8555	3483	3715	3936	105.406	103.008	101.333	43.2265	43.3017	46.7519	1.82164e-130	-1.46523	down
WBGene00001852	hil-1	99	99	161	1673	2032	1750	3.01741	2.6324	4.08676	44.7249	51.0382	44.7844	3.27186e-130	3.53878	up
WBGene00012113	T28B8.1	1131	1162	1361	6888	7521	5798	34.4396	30.4162	34.6426	165.776	166.653	130.176	5.33995e-130	2.111	up
WBGene00012978	Y48B6A.1	6987	7697	7823	2803	3141	3317	82.9827	80.1162	77.3774	29.0451	30.5726	32.8959	1.16509e-129	-1.62492	down
WBGene00008905	F17B5.1	40	77	60	1894	1735	1347	0.419374	0.705603	0.51953	17.4693	15.0301	11.8927	1.36553e-129	4.38177	up
WBGene00009895	scl-2	454	511	525	2863	3453	2956	16.654	16.727	16.1896	92.1059	104.146	92.7883	1.4212e-129	2.27733	up
WBGene00022148	ddx-27	4916	5311	6111	2324	2425	2460	56.2964	53.2997	58.2797	23.2218	22.7621	23.5194	2.60765e-129	-1.5207	down
WBGene00018341	F42A10.5	5952	6766	6883	2971	3263	2963	114.945	114.844	109.904	50.1808	51.8619	47.319	3.80251e-129	-1.4357	down
WBGene00008341	ttr-44	2632	3145	3340	10132	10454	9772	112.315	117.621	118.704	377.425	365.8	348.411	5.86793e-129	1.38953	up
WBGene00021026	W04C9.4	3228	3424	3650	1058	1267	1190	163.397	151.901	153.864	46.7061	52.5704	50.305	6.26279e-129	-1.893	down
WBGene00018866	nath-10	5813	6266	6622	2762	2739	2459	49.4542	46.7153	46.9172	20.503	19.0994	17.4679	2.3845e-128	-1.57531	down
WBGene00013882	msa-1	1732	1711	1706	7784	7559	7554	67.7681	58.6877	55.5928	265.861	242.513	247.005	3.03382e-128	1.79487	up
WBGene00012887	Y45F10D.7	4550	4807	5062	1756	2059	1804	43.0012	39.9841	40.1261	14.4792	15.8734	14.2039	3.05253e-128	-1.70388	down
WBGene00021697	gcn-1	15348	15970	17013	8373	8175	8517	52.1101	47.5156	48.105	24.8069	22.749	24.15	3.68588e-128	-1.29292	down
WBGene00001431	fkb-6	6825	6872	7824	3219	3459	3221	127.917	112.878	122.55	52.8071	53.1112	50.2731	5.47868e-128	-1.46491	down
WBGene00016052	dod-3	194	208	306	2197	2694	2396	12.0013	11.2875	15.8029	118.906	136.946	124.141	1.76679e-127	2.99533	up
WBGene00021533	Y42G9A.3	2566	2784	3059	9013	9749	8890	54.2283	51.6528	53.5981	164.784	167.839	155.999	1.93575e-127	1.36858	up
WBGene00013866	cbs-1	8102	8455	8712	2578	2839	3277	98.8628	90.3272	88.4193	27.4914	28.3467	33.3045	1.83821e-126	-1.88192	down
WBGene00003963	pdi-2	60799	73524	85596	32494	35899	35517	890.341	943.527	1043.88	415.219	430.888	434.377	1.83821e-126	-1.41771	down
WBGene00016628	slc-36.5	345	277	319	3406	3327	2704	6.11422	4.32894	4.71685	53.0315	48.8137	40.3223	4.31254e-126	2.944	up
WBGene00007927	C34C12.8	3006	3245	3680	1088	930	1027	94.3975	89.2847	96.2274	29.7929	23.9189	26.9211	5.05742e-126	-2.03935	down
WBGene00016790	C49H3.3	2620	3138	3004	931	1014	972	161.707	169.69	154.366	50.0666	51.2802	50.0275	7.27231e-126	-1.92599	down
WBGene00012472	Y17G7B.21	7225	7237	8156	3251	3037	3269	137.911	121.11	129.69	54.2757	47.6085	52.1383	7.27231e-126	-1.58558	down
WBGene00011771	T14G8.3	6134	6879	7518	3291	3541	3486	51.3884	50.471	52.4214	24.0425	24.2956	24.3696	1.5067e-125	-1.33477	down
WBGene00012652	Y39A1A.14	2746	2766	2876	880	894	828	72.4733	63.9634	63.2176	20.2468	19.3283	18.2417	4.40195e-125	-2.03034	down
WBGene00000542	clp-1	7788	8139	8732	23959	25967	23433	79.5887	76.4969	74.794	212.406	219.225	200.669	5.22859e-125	1.22227	up
WBGene00002282	let-4	2717	3123	3941	790	920	740	30.0678	30.2927	36.3244	7.6209	8.34187	6.83273	2.96693e-124	-2.32277	down
WBGene00018271	ctsa-1.1	27898	29219	32381	17368	18497	17121	508.962	465.433	494.801	277.894	273.51	262.293	3.8789e-124	-1.10196	down
WBGene00014165	puf-12	12664	13375	14442	6705	7172	6195	140.341	129.886	133.284	64.8364	65.14	57.3329	1.47805e-123	-1.35733	down
WBGene00016508	C37H5.5	5156	5342	5656	2345	2403	2438	58.8985	53.5578	53.8027	23.3989	22.4939	23.249	1.72295e-123	-1.51355	down
WBGene00012316	ctps-1	6109	6682	6934	3275	3407	3287	75.6912	72.5545	71.547	35.4088	34.6008	34.0085	6.54574e-123	-1.32931	down
WBGene00018418	F44E2.4	8668	10776	13440	3731	3931	3581	57.1809	62.2964	73.8391	21.478	21.2543	19.7303	2.3013e-122	-1.87625	down
WBGene00022130	Y71F9B.9	199	243	212	1858	2147	1861	5.19722	5.56349	4.62348	42.4668	46.0868	40.713	3.30816e-122	2.79168	up
WBGene00020902	jmjc-1	4897	5588	5523	1655	1795	2061	59.8333	60.2346	57.446	18.0634	17.5026	20.4587	2.94688e-121	-1.87833	down
WBGene00000915	hsp-90	94230	96172	106032	58399	61742	57888	1169.83	1046.17	1096.83	632.635	624.478	600.454	3.77656e-121	-1.08266	down
WBGene00013899	ZC443.4	569	636	638	2971	3231	3034	8.28019	8.11516	7.73635	37.7632	38.5764	36.9027	4.83536e-121	1.96906	up
WBGene00001166	eftu-2	8059	9053	9711	3578	4037	4281	73.2552	72.1282	73.3099	28.3046	30.0765	32.5002	6.3227e-121	-1.51458	down
WBGene00000110	alh-4	3397	3916	4418	11879	13023	12166	49.9497	51.2651	55.0153	156.105	161.853	152.434	7.01601e-121	1.31447	up
WBGene00022739	toe-1	8304	9184	9931	4068	4716	4596	45.1405	43.7483	44.9555	19.2963	21.0126	20.8655	7.16309e-121	-1.37844	down
WBGene00000380	cct-5	25607	27308	29720	16389	17596	17127	389.962	365.146	374.098	217.699	221.168	219.023	1.10371e-120	-1.03884	down
WBGene00001578	ges-1	791	792	948	3732	4031	3999	12.5995	11.0557	12.5763	51.9257	52.6843	53.2562	2.23805e-120	1.86316	up
WBGene00001749	gst-1	4599	4976	4955	1709	1965	1969	169.62	160.63	152.273	55.0146	59.3564	60.6525	2.26839e-120	-1.70894	down
WBGene00018488	acs-1	6760	7697	8605	3104	3016	2529	78.2142	81.7688	82.8934	31.3625	30.2055	25.9797	2.37744e-120	-1.75155	down
WBGene00000378	cct-2	12850	13598	15135	7376	8042	7206	185.949	171.99	182.291	93.1358	95.1114	88.0696	3.20437e-120	-1.2229	down
WBGene00001064	dpy-2	6827	8965	11049	2773	2747	2752	143.306	164.909	193.159	50.7787	47.2607	48.2441	2.12671e-119	-2.02145	down
WBGene00000982	dhs-19	635	826	968	4747	5064	4267	16.8056	19.1391	21.3247	109.634	109.852	94.321	3.4222e-119	2.18542	up
WBGene00012471	Y17G7B.20	18868	21949	21222	11271	11941	11461	315.139	316.075	291.004	161.34	171.831	161.365	4.59097e-119	-1.1851	down
WBGene00017119	timm-17B.1	8277	8207	9533	3539	3587	3974	253.92	220.628	243.553	94.7141	90.1896	101.801	5.87227e-119	-1.57136	down
WBGene00022037	acs-13	8012	8823	8872	3948	4434	4301	84.1503	81.2082	77.6234	36.2133	38.2167	37.733	7.37825e-119	-1.36528	down
WBGene00006964	xrn-2	6576	7508	8426	3053	3318	3544	59.9431	59.9778	63.9674	24.2782	24.7852	26.9771	1.15322e-118	-1.52164	down
WBGene00021048	W05H9.1	1186	1218	1700	7026	7884	6770	24.8168	22.3608	29.7104	128.527	135.491	118.561	1.37482e-118	2.05127	up
WBGene00003962	pdi-1	12863	14646	16333	7756	8431	8313	226.195	225.721	239.215	118.949	121.396	122.023	3.7095e-118	-1.18098	down
WBGene00000377	cct-1	17880	18120	20762	10099	10891	9972	266.03	236.261	257.261	131.111	132.818	123.917	6.29787e-118	-1.21981	down
WBGene00015920	eif-3.L	9813	10870	11251	5636	6205	5683	141.637	138.239	136.244	71.5051	73.2726	68.636	6.89603e-118	-1.21131	down
WBGene00018491	mdh-1	14805	16390	17410	40348	43487	43738	359.56	348.606	352.293	853.915	864.722	886.403	7.60168e-118	1.04461	up
WBGene00021686	nsun-2	6476	6805	7491	3363	3621	3588	71.4572	65.7346	68.7561	32.389	32.7964	33.0924	4.49974e-116	-1.31884	down
WBGene00001232	eif-3.I	10674	11398	12109	5341	6137	5993	234.871	219.126	221.229	102.237	110.351	109.8	4.71108e-116	-1.31398	down
WBGene00014258	ZK1320.9	2068	2373	2666	7770	8595	7821	36.5305	36.7434	39.2296	119.792	124.474	115.41	8.72275e-116	1.42009	up
WBGene00001814	haf-4	12333	13156	14681	7674	8180	7739	135.745	126.702	134.375	73.6495	73.686	71.0424	1.54341e-115	-1.11218	down
WBGene00011043	rbm-28	4941	5818	6073	2657	2522	2578	64.59	66.6448	66.1118	30.3019	27.0164	28.1476	1.84289e-115	-1.45732	down
WBGene00015168	pdi-6	18159	20688	23804	11160	12058	11732	307.75	307.246	335.966	165.028	167.497	166.045	2.00703e-115	-1.18217	down
WBGene00001065	dpy-3	5368	7496	8949	1609	1997	1931	155.237	189.989	215.534	40.594	47.3279	46.6361	2.73389e-115	-2.29714	down
WBGene00012126	T28D6.6	4473	4822	5321	2317	2418	2259	100.101	94.6609	99.7106	45.2401	44.3473	42.2373	1.51003e-114	-1.40593	down
WBGene00011042	R05H10.1	118	121	139	1314	1372	1371	3.81513	3.43144	3.75228	37.2663	36.5573	37.2106	1.69556e-114	3.04426	up
WBGene00022159	mppa-1	3280	3494	3762	1482	1519	1502	54.8713	51.2279	52.4149	21.6373	20.8289	20.9796	5.00382e-114	-1.56875	down
WBGene00012185	W01F3.2	48	68	58	1015	1206	1140	1.22143	1.51492	1.21371	22.5791	25.2059	24.2693	8.81873e-114	3.85518	up
WBGene00019748	atg-2	1801	1920	2346	7888	7891	7267	6.73419	6.30852	7.29818	25.8582	24.2761	22.6767	1.042e-113	1.57843	up
WBGene00018782	cct-3	14607	15924	17576	9434	9501	8831	156.027	149.058	156.355	87.9319	83.1774	78.7799	1.24421e-113	-1.13626	down
WBGene00004915	snr-2	5670	6280	6671	2595	2901	3014	219.182	212.733	214.755	87.5295	91.8884	97.2991	1.5746e-113	-1.4723	down
WBGene00009342	fasn-1	51532	57368	67367	33521	33549	34191	169.964	165.813	185.042	96.4746	90.6959	94.1807	2.60818e-113	-1.13932	down
WBGene00007073	ugt-2	586	637	713	3425	3153	3167	9.17902	8.74061	9.29981	46.825	40.487	41.4384	3.7007e-113	1.97849	up
WBGene00001564	icl-1	9247	8592	11497	120606	134417	101238	80.9243	64.881	82.1939	917.784	950.552	726.572	5.58283e-113	3.21583	up
WBGene00001072	dpy-10	5794	8092	9475	2276	2357	2417	125.9	154.092	171.464	43.1527	41.9787	43.8495	1.58774e-112	-2.05058	down
WBGene00006489	zhit-3	3012	3118	3618	1288	1299	1267	55.652	50.4935	55.6738	20.7565	19.6636	19.5422	1.77686e-112	-1.67839	down
WBGene00001037	dnj-19	13108	13987	14845	7768	8328	7475	237.886	222.444	224.398	123.012	123.894	113.278	4.14637e-112	-1.17746	down
WBGene00012768	eef-1B.2	27401	29984	32281	17969	18589	19235	779.379	751.605	770.571	448.804	436.146	459.654	4.30215e-112	-1.02898	down
WBGene00021066	W06H8.2	862	637	745	5383	5428	5356	15.5892	10.0928	11.2216	84.9966	80.4959	80.9314	4.69828e-112	2.47195	up
WBGene00011966	T23G7.3	2996	3306	3608	11351	11480	10144	69.9542	67.6672	70.1705	231.341	219.773	197.871	5.27529e-112	1.38606	up
WBGene00000973	dhs-9	1046	1017	929	5110	6038	5813	28.1293	23.9578	20.7953	119.968	133.148	130.613	5.5188e-112	2.13423	up
WBGene00013435	Y66D12A.9	3569	3874	3989	1461	1406	1575	107.798	102.561	100.36	38.4898	34.8135	39.7289	9.0944e-112	-1.70488	down
WBGene00001772	gst-24	3067	3437	2785	732	658	587	118.056	115.938	89.2685	24.5673	20.7355	18.8688	9.8673e-112	-2.56589	down
WBGene00001240	elo-2	14794	15854	16569	8648	8073	8464	395.739	371.645	369.126	201.857	177.003	189.091	1.83315e-111	-1.25133	down
WBGene00013983	ZK512.2	3575	4103	4110	1709	1793	1754	53.2148	53.5244	50.9583	22.2025	21.8736	21.7915	2.11512e-111	-1.50782	down
WBGene00016431	C35A11.4	1192	1257	1296	203	178	233	19.448	17.9645	17.6117	2.87832	2.36854	3.17474	1.50502e-110	-2.92525	down
WBGene00015752	C14B9.2	14153	16092	19227	8467	8681	8293	186.244	185.578	210.714	97.2295	93.6311	91.1425	1.96612e-110	-1.29706	down
WBGene00000370	ccg-1	6076	6789	6982	17999	20218	18306	153.925	150.727	147.314	397.916	419.86	387.344	2.30397e-110	1.16036	up
WBGene00019893	sgt-1	10600	11622	12554	6534	6816	6966	222.349	213.629	219.31	119.589	117.192	122.036	2.574e-110	-1.11947	down
WBGene00003130	map-2	6040	6652	7166	3340	3706	3438	101.361	97.4656	99.8213	48.7265	50.9213	48.0944	9.16508e-110	-1.26539	down
WBGene00001790	gst-42	2029	2160	2204	474	547	614	55.9349	52.1741	50.6088	11.3903	12.3554	14.118	1.03022e-109	-2.30158	down
WBGene00016172	C27H5.2	908	965	1158	4202	4180	4174	14.168	13.3185	15.4632	57.878	53.9352	54.6352	1.07281e-109	1.70137	up
WBGene00019604	pgph-1	231	265	305	2602	2321	3382	6.60743	6.65258	7.27457	65.1021	54.5525	81.0107	1.39101e-109	3.00023	up
WBGene00004000	pgp-6	256	289	236	2016	2212	2397	1.77174	1.74852	1.35454	12.3386	12.6999	14.0569	2.74609e-109	2.70746	up
WBGene00010582	K05C4.5	4974	5522	5606	2623	2516	2489	63.384	61.6652	59.493	29.1627	26.2802	26.4825	1.56144e-108	-1.42116	down
WBGene00006945	wars-1	4676	5018	5648	2284	2034	2158	81.4722	76.6234	81.9589	34.7272	29.0462	31.3979	2.02395e-108	-1.58313	down
WBGene00012783	Y43C5A.3	243	222	284	1910	1851	1895	9.37755	7.48414	9.12407	64.3095	58.5636	61.0734	6.35937e-108	2.54996	up
WBGene00007413	pro-2	5470	5457	6036	2385	2642	2633	66.0148	57.7111	60.6611	25.1126	26.1341	26.5295	6.35937e-108	-1.4922	down
WBGene00013263	txdc-12.1	6211	7423	8473	3391	3652	3416	255.344	267.444	290.095	121.643	123.054	117.273	6.88509e-108	-1.41673	down
WBGene00017300	rpc-2	6931	7638	8076	3704	4033	3448	53.1584	51.3415	51.3534	24.7918	25.3478	21.9847	1.00584e-107	-1.36156	down
WBGene00008446	E01G4.3	3382	3416	4020	11279	12317	12813	144.94	128.515	143.593	410.27	421.159	456.96	5.42514e-107	1.40116	up
WBGene00001030	dnj-12	14159	15041	16386	8664	9593	8856	247.602	230.26	239.353	132.406	137.765	129.43	6.39196e-107	-1.09546	down
WBGene00012886	Y45F10D.6	6	10	24	885	1121	1013	0.25544	0.377831	0.898789	34.887	41.492	38.232	8.71752e-107	5.64117	up
WBGene00011156	rbm-3.2	8353	10853	9733	3608	4014	4178	558.03	635.397	541.553	210.31	219.805	233.125	1.00859e-106	-1.63458	down
WBGene00000776	cpl-1	12367	14773	16392	38602	41808	39326	288.85	302.395	318.85	786.855	800.42	767.166	1.13144e-106	1.11633	up
WBGene00020592	ugt-12	2282	2112	2302	8930	9358	8417	37.9065	30.7397	31.8444	129.446	127.425	116.783	1.2386e-106	1.63755	up
WBGene00010625	K07C5.2	676	636	704	3411	3433	3202	18.688	15.4206	16.2181	82.3951	77.8978	74.0111	1.78198e-106	1.95741	up
WBGene00000981	dhs-18	529	574	550	2827	2882	3128	14.7746	14.1234	12.8944	70.4394	65.9342	73.6235	1.85729e-106	2.0583	up
WBGene00019060	acox-3	562	625	694	2755	3030	2971	7.58154	7.40612	7.80211	32.5053	33.5884	33.5671	2.70663e-106	1.8656	up
WBGene00015251	B0546.4	295	217	270	2188	2589	2339	10.3561	6.81503	7.6857	69.8766	77.9672	70.9646	3.25968e-106	2.80116	up
WBGene00008572	F08B12.4	1757	1859	1597	7997	8866	7848	105.995	97.77	79.7443	408.097	415.945	377.798	1.13071e-105	1.88064	up
WBGene00002267	lec-4	2796	2756	2877	9494	10179	9455	75.8734	65.0939	64.4071	223.637	226.049	214.047	1.53401e-105	1.43357	up
WBGene00016866	coel-1	177	210	260	1964	1791	1711	2.90667	3.00822	3.60542	28.4458	24.7138	23.9818	2.56545e-105	2.71386	up
WBGene00021277	ddx-10	4810	5168	5051	2218	2244	2271	58.7004	55.5365	50.4739	23.6798	22.57	23.4524	3.03874e-105	-1.50405	down
WBGene00022792	ZK686.2	2692	2801	2846	1026	1012	1025	38.9572	35.5279	34.3078	12.9548	12.0043	12.3891	3.13072e-105	-1.78728	down
WBGene00011300	R107.5	4455	5066	5076	2112	2196	1862	125.325	124.908	118.863	51.8267	50.6169	43.6874	3.51035e-105	-1.58458	down
WBGene00002017	hsp-16.11	1140	1252	1047	155	158	123	66.5474	64.0475	50.8929	7.89306	7.53587	5.97909	3.71713e-105	-3.28791	down
WBGene00000399	cdh-7	2812	3540	4171	1129	992	1027	17.4575	19.2587	21.5684	6.1151	5.04831	5.32287	9.9757e-105	-2.06504	down
WBGene00020068	cra-1	6190	6676	7518	3685	3772	3671	52.7409	49.8474	53.3442	27.3926	26.3407	26.1202	1.01509e-104	-1.21575	down
WBGene00000830	ctl-1	570	648	781	3460	3223	3616	10.0294	9.98472	11.4431	53.1383	46.4936	54.9725	1.7057e-104	2.01473	up
WBGene00020683	ribo-1	14375	16341	17175	9759	10483	9669	203.528	202.751	202.52	120.571	121.657	114.329	3.7149e-104	-1.0234	down
WBGene00000402	cdh-10	5857	6591	8897	2416	2312	2047	30.1217	29.6729	38.078	10.815	9.72442	8.77697	1.26985e-103	-1.98086	down
WBGene00014096	ZK829.7	3666	4097	4251	11092	11535	10866	66.0349	64.6695	63.7609	174.34	170.295	163.461	1.60005e-103	1.13077	up
WBGene00007947	C35A5.3	284	278	379	2016	2310	2337	5.20676	4.46083	5.79273	32.2833	34.7448	35.8203	2.15394e-103	2.46101	up
WBGene00019187	H11E01.2	100	139	85	1561	1485	1500	1.94955	2.38541	1.37705	26.7669	23.9223	24.6114	2.48055e-103	3.40659	up
WBGene00022765	ZK546.14	3458	3678	3762	1568	1572	1452	61.1932	57.3203	55.6922	24.4363	22.7915	21.5209	7.52585e-103	-1.59045	down
WBGene00016500	memo-1	921	1084	1274	4327	4447	4456	18.0379	18.5873	20.6651	71.5909	69.9034	71.9888	7.75877e-103	1.666	up
WBGene00002015	hsp-16.1	1113	1226	1011	150	153	121	70.6011	68.1609	53.4272	8.26628	7.94	6.38724	1.20869e-102	-3.28941	down
WBGene00012738	eif-3.J	3404	3786	3697	1562	1590	1555	103.839	101.208	93.9157	41.5833	39.7516	39.6098	3.68207e-102	-1.55341	down
WBGene00008132	gale-1	5005	5059	6224	2291	2114	2308	105.591	93.5479	109.294	42.1703	36.5633	40.6549	5.74115e-102	-1.61627	down
WBGene00021660	nol-14	3317	3662	4217	1629	1709	1703	33.5604	32.2171	35.5395	14.2587	13.9973	14.1941	2.24819e-101	-1.48999	down
WBGene00017948	mth-1	1425	1646	1836	377	474	424	7.26359	7.35129	7.79312	1.67525	1.97994	1.8012	4.00357e-101	-2.27254	down
WBGene00017435	F13H8.2	4496	5116	5270	2077	2215	2410	40.6968	40.589	39.7274	16.4037	16.437	18.2179	4.97408e-101	-1.49237	down
WBGene00019354	K03B4.2	804	955	1032	3749	3757	3616	27.2408	28.1995	29.0056	110.212	103.534	101.739	5.09914e-101	1.64584	up
WBGene00003957	pcp-2	3845	3468	4025	1045	961	1216	30.4973	24.106	26.5868	7.22851	6.24559	8.04936	7.55775e-101	-2.15185	down
WBGene00006602	tps-1	2959	2969	3134	9381	9932	9456	18.8191	16.5738	16.5762	52.0826	51.7238	50.2065	7.71581e-101	1.31328	up
WBGene00008392	D1086.5	196	143	160	2194	2092	1701	6.79923	4.35464	4.63238	66.6734	59.7084	49.4656	1.86854e-99	3.18233	up
WBGene00010094	tsfm-1	3206	3591	3876	1526	1729	1576	81.2883	79.7924	81.8503	33.7617	35.9326	33.3593	1.91738e-99	-1.48488	down
WBGene00003528	nas-9	219	169	143	1981	2322	2180	3.48202	2.3551	1.88414	27.5147	30.2783	28.9792	2.3412e-99	3.19921	up
WBGene00022722	tomm-70	4974	5117	5486	2489	2511	2264	73.5698	66.3288	67.5709	32.1211	30.4356	27.9625	4.21561e-99	-1.44518	down
WBGene00006331	sup-26	12802	14368	16132	36309	36511	37716	176.08	176.871	179.025	432.229	408.673	442.107	5.84556e-99	1.00773	up
WBGene00006529	tba-2	27835	32677	36210	18200	20316	19608	505.809	497.065	522.03	277.388	273.165	289.637	6.48128e-99	-1.07552	down
WBGene00001783	gst-35	363	268	260	2880	2788	3010	13.065	8.42715	7.77072	90.4524	82.2473	90.4949	1.85163e-98	2.88763	up
WBGene00011397	T03E6.8	354	352	331	2228	2198	2138	5.49411	4.68671	4.18487	30.7541	27.8367	27.7411	3.05607e-98	2.29329	up
WBGene00022021	Y61A9LA.10	5315	5657	6258	2713	3071	2996	44.091	41.1306	43.2371	19.6387	20.8809	20.758	4.80551e-98	-1.3163	down
WBGene00017304	nmad-1	1046	1095	1101	4135	4190	4262	29.8458	27.4097	26.1651	103.001	98.0018	101.556	7.99023e-98	1.60202	up
WBGene00010139	F56A8.3	6767	7171	7940	4127	4242	4179	117.527	111.509	115.591	63.5829	61.6357	60.3825	9.56133e-98	-1.14613	down
WBGene00009367	F33H2.3	7135	7435	7675	3771	3612	3814	221.33	202.11	198.266	102.055	91.8309	98.7936	1.26136e-97	-1.33588	down
WBGene00004189	pars-1	11178	12054	13846	6592	7495	7053	164.451	151.338	171.797	82.3887	88.005	84.3562	1.864e-97	-1.15347	down
WBGene00019300	swt-1	287	284	364	2004	2057	1871	6.46375	5.59467	6.8222	39.4072	37.9951	35.2185	2.38527e-97	2.30422	up
WBGene00004315	rbd-1	4999	5115	5443	2439	2397	2162	50.419	45.2674	45.74	21.4932	20.2325	18.2279	2.56824e-97	-1.49691	down
WBGene00011239	pges-2	4467	4929	5139	2541	2515	2469	101.519	98.1482	97.2623	50.3809	46.8446	46.8437	1.06489e-96	-1.29316	down
WBGene00010560	eif-2beta	8199	8408	9461	4730	4471	4633	237.51	213.108	228.562	119.675	106.283	111.207	1.85516e-96	-1.25747	down
WBGene00004023	pho-4	1634	1592	1557	6463	6399	6589	31.8241	27.1733	25.3263	109.984	102.133	107.538	2.49857e-96	1.66417	up
WBGene00001228	eif-3.E	11352	11314	12762	6297	6542	6739	191.444	167.21	179.24	92.6582	90.4308	94.9155	2.88492e-96	-1.20137	down
WBGene00020601	T20B12.3	2386	2785	2824	889	1084	991	41.3445	42.2833	40.7426	13.4312	15.3862	14.3322	3.02428e-96	-1.77057	down
WBGene00016934	mboa-3	4022	4195	4717	1599	1894	1921	65.7414	60.0434	64.2065	22.7727	25.4462	26.2164	3.40909e-96	-1.59795	down
WBGene00013143	Y53C12B.1	3418	4135	4050	1412	1727	1463	37.4251	39.679	36.9318	13.4927	15.4931	13.374	5.65916e-96	-1.67447	down
WBGene00012907	cpt-1	3031	3310	3785	10211	10348	9523	30.1236	28.8328	31.3325	88.5669	84.3136	79.0572	2.33537e-95	1.2244	up
WBGene00003620	nhr-21	1276	1354	1378	6112	6998	5287	23.0749	21.4704	20.8327	98.5305	103.99	80.1115	2.98382e-95	1.83904	up
WBGene00015483	C05D11.5	647	630	789	3200	3183	3065	12.9981	11.0887	13.2054	56.153	52.4616	51.4707	3.45125e-95	1.83944	up
WBGene00012648	Y39A1A.9	8864	10144	11973	4983	4859	5342	126.145	126.507	141.905	61.8783	56.6761	63.4889	4.2141e-95	-1.36496	down
WBGene00000901	daf-5	6608	6886	7952	18315	19131	18961	73.6078	67.2202	73.7685	178.031	174.681	176.406	4.80966e-95	1.04812	up
WBGene00020549	nmt-1	5585	6214	6649	3396	3600	3551	92.9909	90.6661	92.1904	49.3367	49.1221	49.378	1.40764e-94	-1.15012	down
WBGene00015650	pkg-2	3134	3387	3779	10167	10970	9609	41.5498	39.9328	42.4314	119.732	124.762	108.537	1.97183e-94	1.2293	up
WBGene00001229	eif-3.F	9450	9940	10907	6088	6039	5889	216.533	199.582	208.134	121.713	113.42	112.691	2.02422e-94	-1.0946	down
WBGene00000781	cpr-1	10552	10989	11990	27982	28688	29560	263.269	240.251	249.114	609.2	586.667	615.943	2.89876e-94	1.01388	up
WBGene00007969	acs-19	15036	14774	17386	41250	44959	43329	179.424	154.577	172.73	429.374	439.836	431.845	3.08823e-94	1.10697	up
WBGene00011112	R07E5.4	1652	2020	2298	613	537	534	53.8724	57.7258	62.4092	17.436	14.3435	14.536	3.97281e-94	-2.1497	down
WBGene00016046	C24B5.4	191	284	266	1934	2054	1714	4.5669	5.95976	5.29842	40.453	40.3577	34.3273	5.65202e-94	2.5777	up
WBGene00013958	nol-16	2328	2249	2704	818	833	886	94.9761	80.4093	91.8982	29.0981	27.8592	30.1903	6.22255e-94	-1.85852	down
WBGene00010232	F58B3.6	1739	1984	2001	6368	6470	5898	33.2831	33.2788	31.8956	106.357	101.504	94.2823	1.05312e-93	1.3606	up
WBGene00004442	rpl-28	28978	33764	31564	15820	17966	17746	1860.92	1900.94	1688.21	887.204	946.153	953.541	1.09713e-93	-1.21861	down
WBGene00006886	vap-1	3321	3724	3820	1619	1772	1756	63.0973	62.9156	60.2577	26.6575	27.7272	27.5089	1.59812e-93	-1.4208	down
WBGene00016283	zmp-3	508	515	682	2742	3280	3007	7.24274	6.43347	8.0995	34.1181	38.334	35.8105	1.63278e-93	2.04895	up
WBGene00020784	tat-4	1212	1316	1467	4339	4839	4576	28.2235	28.7534	29.405	106.647	114.573	108.128	3.55818e-93	1.43357	up
WBGene00022122	trap-1	12068	14003	15360	7959	7845	8363	301.639	306.699	319.711	173.572	160.709	174.568	6.40959e-93	-1.11778	down
WBGene00021074	W07E6.2	3545	3644	3927	1669	1723	1771	64.2876	57.9138	59.307	26.4116	25.6253	26.8252	1.76283e-92	-1.45027	down
WBGene00018893	wdr-12	2815	3206	3545	1168	1382	1368	53.7657	53.7969	56.383	19.343	21.5401	21.7701	1.21703e-91	-1.62575	down
WBGene00009049	F22B8.7	654	792	775	3083	3387	2991	16.7296	17.7435	16.5139	68.8246	70.984	63.9028	2.12806e-91	1.73695	up
WBGene00010697	uda-1	2170	2345	2416	6838	7653	7726	32.1461	30.4412	29.7981	88.3967	92.9328	95.5873	5.27456e-91	1.32862	up
WBGene00015676	mct-6	9979	10618	11578	5662	6201	6427	119.081	111.041	115.061	58.9591	60.653	64.0512	5.78569e-91	-1.15956	down
WBGene00007617	rrbs-1	5432	6177	6534	3387	3349	3447	134.076	133.599	134.306	72.9377	67.756	71.052	6.24619e-91	-1.17537	down
WBGene00018823	F54E2.1	3275	3201	3869	1402	1460	1274	68.3375	58.523	67.2238	25.511	24.9616	22.1875	6.24619e-91	-1.66249	down
WBGene00013489	col-42	18890	20448	22433	51952	60459	61394	498.592	472.98	493.109	1196.57	1308.03	1353.38	8.41116e-91	1.14364	up
WBGene00004134	myrf-1	16713	20277	23648	10429	9642	10169	127.127	135.157	149.799	69.2197	60.11	64.5956	2.32661e-90	-1.33746	down
WBGene00001498	fars-3	7778	8128	8962	4736	5118	4916	113.533	103.976	108.943	60.3272	61.2277	59.9314	2.69071e-90	-1.09705	down
WBGene00020171	T02H6.1	3978	4613	4426	1950	1901	2070	59.6352	61.3802	55.2175	25.8395	23.3777	25.9213	4.39946e-90	-1.47863	down
WBGene00021789	nol-6	3112	3373	3501	1566	1538	1573	26.1814	24.8681	24.5326	11.4976	10.6012	11.0496	1.07046e-89	-1.437	down
WBGene00018564	F47D12.9	1061	1030	1361	5820	5737	4774	14.0119	11.8904	14.9655	71.0159	61.9779	52.5769	1.21024e-89	1.88862	up
WBGene00006584	tni-1	11156	11271	12510	6394	7016	6892	299.291	264.983	279.508	149.67	154.263	154.413	1.24713e-89	-1.1297	down
WBGene00009211	wdr-46	3836	4080	4530	1761	2017	2034	54.575	50.3445	53.1232	21.6637	23.2736	23.9126	1.373e-89	-1.44075	down
WBGene00010405	erfa-3	9089	9480	10597	5603	5480	5775	126.925	115.935	122.946	68.7907	62.8291	67.6643	1.65641e-89	-1.1346	down
WBGene00010266	dct-18	9562	10913	11126	6481	6824	6692	350.134	350.201	339.309	207.074	204.808	204.661	2.70006e-89	-1.00499	down
WBGene00010524	K03B8.6	2895	3264	3712	1354	1563	1449	56.1822	55.9764	60.6667	22.9259	25.13	23.5722	2.81682e-89	-1.51529	down
WBGene00022078	epg-9	894	872	1315	5248	5569	4968	16.6913	14.2829	20.4554	85.9257	85.4435	78.4406	5.68144e-89	2.00605	up
WBGene00001258	emb-4	6781	6974	7518	3914	4070	4062	38.9486	35.1035	35.9456	19.7488	19.2301	19.7168	7.36467e-89	-1.16657	down
WBGene00010177	F57A8.1	4545	5071	5267	12442	13092	12400	63.8427	62.392	61.6167	152.453	150.88	145.406	8.56173e-89	1.00168	up
WBGene00001337	ears-1	12321	12546	14093	7906	8206	7782	96.3555	85.9768	91.7845	53.9465	52.5962	50.8239	8.56543e-89	-1.05114	down
WBGene00004481	rps-12	56248	68497	66595	38300	41419	41172	3200.47	3416.9	3156.34	1901.39	1931.5	1956.78	3.56693e-88	-1.00642	down
WBGene00043097	C02D5.4	1890	1874	2018	6259	6743	7114	60.3066	52.3781	53.6232	174.268	176.349	189.592	6.60198e-88	1.44419	up
WBGene00008985	F20G2.1	152	165	154	1224	1330	1269	5.04212	4.80049	4.27235	35.5823	36.3139	35.3043	1.13396e-87	2.64227	up
WBGene00015913	C17F4.7	9030	8795	8946	3391	3323	4023	393.273	335.667	324.434	128.851	118.604	146.17	1.3713e-87	-1.66329	down
WBGene00016667	cpg-18	1359	1276	1273	231	199	269	51.038	41.9671	39.799	7.55308	6.11456	8.42187	1.72697e-87	-2.802	down
WBGene00001230	eif-3.G	6036	6870	7662	3738	3976	4010	147.542	147.137	155.966	79.7225	79.647	81.8477	1.89924e-87	-1.15174	down
WBGene00004888	smo-1	5794	6434	7022	2390	2659	3083	338.979	329.91	342.18	122.004	127.525	150.634	2.09848e-87	-1.58196	down
WBGene00014058	ZK673.2	2510	2514	2760	7999	8561	7646	67.7717	59.5025	62.0838	188.532	189.517	172.469	1.0227e-86	1.28423	up
WBGene00008444	tbc-14	1329	1564	1875	5933	5891	5492	17.7102	18.2611	20.8125	68.9649	64.4517	61.1985	1.34879e-86	1.51594	up
WBGene00012615	dct-16	4742	5979	5959	2256	2342	2672	309.412	341.661	324.409	128.566	125.307	145.127	1.56075e-86	-1.53498	down
WBGene00007235	ahsa-1	6487	7146	7150	3940	3852	3736	153.168	147.875	140.6	81.1819	74.5521	73.6702	3.14621e-86	-1.1955	down
WBGene00001604	gln-3	10810	11156	12888	28430	31864	31227	209.366	189.679	208.342	477.381	502.996	501.336	4.34547e-86	1.04453	up
WBGene00007964	cyp-25A2	251	224	309	1719	1729	1827	4.43638	3.46004	4.54525	26.5504	25.077	27.0041	5.80687e-86	2.38398	up
WBGene00012059	T26G10.1	3319	3511	3734	1728	1738	1754	58.0183	53.7738	54.353	26.3443	24.8947	25.6025	8.14943e-86	-1.36055	down
WBGene00001045	dnj-27	3669	4149	4750	2121	2143	2036	41.1344	40.7674	44.4065	21.212	20.225	19.0802	9.65694e-86	-1.33482	down
WBGene00017012	acs-22	1426	1680	1980	5746	5756	5728	16.5924	17.8884	19.1762	60.8129	57.6422	58.1047	1.4129e-85	1.41605	up
WBGene00012896	snrp-200	12292	14045	15461	8473	8785	9092	50.1146	50.1811	52.4949	30.1444	29.3583	30.9594	1.66302e-85	-1.00717	down
WBGene00017128	E04F6.9	643	665	881	3168	3708	3293	40.1522	36.3762	45.8113	172.638	189.816	171.747	2.6142e-85	1.86313	up
WBGene00007055	tag-196	2571	2959	2978	7977	8130	7759	44.9889	45.3485	43.3667	123.824	116.583	113.338	2.97748e-85	1.13955	up
WBGene00021420	trap-3	9337	11704	12825	5875	6299	6258	319.183	350.635	365.144	175.238	176.486	178.655	5.55412e-85	-1.21462	down
WBGene00001233	eif-3.K	5901	6846	6461	3004	3484	3188	195.021	198.268	177.812	86.6031	94.3665	87.9769	7.38646e-85	-1.33485	down
WBGene00016844	sucg-1	2452	3088	3029	924	1020	1146	47.6892	52.6312	49.05	15.6814	16.2607	18.6016	1.60955e-84	-1.80577	down
WBGene00003844	odc-1	3406	4299	4586	12257	13607	11870	59.9086	66.2678	67.1848	188.133	196.184	174.388	1.9409e-84	1.27346	up
WBGene00021464	ugt-31	176	201	168	1917	1508	1565	2.92394	2.91193	2.3222	27.7882	20.5336	21.7134	2.20284e-84	2.80984	up
WBGene00000993	dhs-30	397	506	514	2293	2552	2184	10.4235	11.6351	11.2451	52.5425	54.9518	47.9118	3.51445e-84	1.95478	up
WBGene00019436	K06A9.2	232	263	281	1486	1549	1599	3.36303	3.33566	3.39589	18.8212	18.4369	19.3892	1.3961e-83	2.21546	up
WBGene00004358	rhr-1	8506	9089	9325	4267	4953	5012	153.073	142.802	138.575	65.868	72.367	74.4095	1.96825e-83	-1.26589	down
WBGene00008205	sams-1	28104	30424	31950	17784	18020	19808	393.384	373.296	373.048	225.187	208.427	241.149	4.6584e-83	-1.04721	down
WBGene00007143	B0334.3	3624	3924	4197	9927	10469	10666	49.4074	46.8258	48.8853	118.014	116.748	121.344	5.75411e-83	1.05459	up
WBGene00016513	C38C3.4	491	482	517	2630	3000	2338	12.1143	10.4301	10.6225	56.6923	60.7467	48.2248	1.62427e-82	2.05339	up
WBGene00003633	nhr-43	347	313	401	1887	2128	1957	5.85049	4.65856	5.62292	28.1832	29.7518	27.7216	1.68203e-82	2.12893	up
WBGene00011638	ostb-1	7853	8272	8995	5116	5188	5248	137.535	126.91	131.161	78.1053	74.4251	76.7595	4.06288e-82	-1.03684	down
WBGene00020868	eif-1	7700	8411	8978	4687	5155	5214	367.698	352.002	357.068	195.277	201.758	207.931	6.14776e-82	-1.08138	down
WBGene00018967	ddx-15	6737	7418	7649	3919	3705	4130	75.6521	72.9915	71.8926	38.4012	34.3966	38.729	7.16437e-82	-1.23459	down
WBGene00003123	mag-1	5203	5798	5965	2946	3341	3202	240.206	234.579	229.32	118.661	126.414	123.451	8.24723e-82	-1.1832	down
WBGene00010440	ttr-51	927	872	917	3726	4777	4149	52.7594	43.5188	43.4544	185.141	222.973	197.342	9.69505e-82	1.85454	up
WBGene00020999	W03F9.1	3993	4211	4726	1605	1826	2037	60.2176	55.6234	59.3327	21.1352	22.6873	25.6813	1.34601e-81	-1.5814	down
WBGene00010063	dhrs-4	409	399	570	2684	2750	2366	13.5681	11.6042	15.7401	77.7502	74.8484	65.6157	2.13252e-81	2.14338	up
WBGene00022378	Y94H6A.5	3803	3819	4282	1890	2097	1925	41.2168	36.2061	39.1212	17.8373	18.827	17.8331	2.3833e-81	-1.35434	down
WBGene00018946	F56C3.9	11	14	37	815	852	720	0.401642	0.456034	1.12819	26.4728	26.0136	22.4003	4.19568e-81	4.73917	up
WBGene00020593	ugt-11	690	600	682	3504	3394	3010	10.8557	8.27101	8.93219	48.1378	43.8042	39.5814	9.36732e-81	1.96379	up
WBGene00015795	C15F1.2	1578	1997	2343	622	655	583	16.5998	18.4062	20.5269	5.70945	5.64245	5.11498	1.07162e-80	-1.99374	down
WBGene00002247	lam-1	10948	11883	13316	7579	8032	7213	51.9798	49.2226	52.4779	31.2673	31.0275	28.5264	1.17242e-80	-1.00682	down
WBGene00013238	trap-4	9383	10528	12040	6331	6905	6282	388.725	382.167	414.355	229.026	228.979	216.958	1.46956e-80	-1.05234	down
WBGene00011538	T06E6.1	2863	3357	3699	1324	1522	1553	56.8333	58.3897	61.154	22.9308	24.7662	25.7352	1.67092e-80	-1.51018	down
WBGene00009578	F40F8.5	2759	3094	3507	8568	9785	8667	49.9742	49.5614	52.2124	136.202	149.939	131.434	6.80898e-80	1.18239	up
WBGene00017123	maoc-1	765	668	756	3545	3327	3302	19.9792	15.2938	16.4621	80.8779	71.3002	72.0944	8.25885e-80	1.85387	up
WBGene00001441	fkh-9	4639	5663	5375	14121	14302	14067	69.0442	73.1707	66.1974	173.165	177.26	159.525	1.11633e-79	1.0905	up
WBGene00001566	acdh-13	2936	3271	3409	1283	1547	1492	40.1199	39.2602	38.7939	15.273	17.3244	17.0402	1.13154e-79	-1.49561	down
WBGene00021930	Y55F3AM.13	4533	5024	5389	2891	3001	2932	110.616	107.419	109.517	61.5568	60.0081	59.7442	1.52203e-79	-1.10355	down
WBGene00012326	W07E11.1	2622	3042	3345	7981	9011	8898	10.7641	10.9461	11.4367	28.5937	30.3256	30.5146	2.54542e-79	1.17657	up
WBGene00004445	rpl-31	39272	48807	44397	23838	25767	26451	2307.21	2523.28	2182.04	1280.42	1303.2	1361.92	5.60168e-79	-1.14507	down
WBGene00020687	ruvb-2	3282	3774	3707	1360	1462	1675	59.9533	60.5918	56.5465	21.7038	21.9383	25.6892	9.48386e-79	-1.59912	down
WBGene00003999	pgp-5	137	194	153	1252	1320	1359	0.976596	1.20974	0.906668	7.84448	7.82608	8.11264	1.49545e-78	2.64315	up
WBGene00015461	krr-1	2175	2344	2475	1007	1097	1027	48.2318	45.5491	45.7035	19.4852	19.9373	19.0217	1.6027e-78	-1.50136	down
WBGene00219316	F21A3.11	352	587	501	2760	3127	2774	6.0609	8.87356	7.20015	41.5676	44.2412	39.9836	1.79665e-78	2.22923	up
WBGene00000039	acn-1	6708	8439	10864	3515	3587	3289	60.3664	66.5396	81.4105	27.584	26.4616	24.7212	4.26151e-78	-1.64914	down
WBGene00007024	plin-1	3835	3669	4326	11138	12126	12487	61.4459	50.9524	57.0347	154.066	158.72	166.732	6.69231e-78	1.24371	up
WBGene00018891	F55F8.3	4411	4526	4723	1804	2109	2218	40.6977	36.599	36.2899	14.5226	15.947	17.0898	9.41131e-78	-1.5005	down
WBGene00003794	npp-8	4476	4883	5385	2868	2914	2871	28.0687	26.8675	28.1242	15.6959	14.988	15.0403	1.43386e-77	-1.1115	down
WBGene00018758	F53E10.1	527	571	673	2674	2493	2461	12.9829	12.3155	13.8073	57.4804	50.3479	50.6293	3.71731e-77	1.7547	up
WBGene00009177	F26H9.5	2270	2354	2816	7441	8473	7290	49.1713	44.6705	50.7933	140.646	150.441	131.889	3.91207e-77	1.29174	up
WBGene00013039	scav-3	1395	1663	1807	4832	5110	4865	22.1853	23.1755	23.9306	67.0713	66.6368	64.6386	4.74559e-77	1.2595	up
WBGene00003858	ogt-1	5769	5504	6640	16732	17273	16293	39.3827	32.884	37.6336	98.7892	95.875	92.0658	7.22719e-77	1.13933	up
WBGene00007919	cup-16	85	87	78	958	1116	871	1.62091	1.59623	1.21898	15.7217	17.5482	13.8053	7.70801e-77	3.14848	up
WBGene00009787	F46F2.3	41994	46374	51232	24065	27870	29370	1858.6	1798.61	1888.33	929.371	1011.02	1085.58	7.75283e-77	-1.12269	down
WBGene00013037	Y49E10.18	2325	2118	2363	625	802	753	58.9544	47.0573	49.8851	13.8161	16.6549	15.9307	1.27272e-76	-1.98284	down
WBGene00008439	mfb-1	353	366	418	1987	1945	1775	5.75498	5.2296	5.67988	28.292	26.0099	24.1832	1.27889e-76	1.96838	up
WBGene00001020	dnj-2	1838	2343	2428	845	812	882	39.4484	44.052	43.3838	15.8252	14.2736	15.8002	1.66097e-76	-1.71173	down
WBGene00021095	mlt-8	5672	7756	8819	3174	3276	2948	145.971	174.905	188.993	71.2596	69.0916	63.3558	4.47534e-76	-1.57111	down
WBGene00019678	K12H4.3	4128	4324	4251	1733	1866	2061	96.7256	88.7849	82.9607	35.4298	35.8389	40.33	8.05873e-76	-1.51128	down
WBGene00010148	F56D5.3	199	278	267	1454	1544	1550	3.83068	4.69832	4.29207	24.4931	24.4303	24.9927	8.45439e-76	2.24933	up
WBGene00009050	F22D6.2	7253	7758	8723	22053	22568	19510	177.133	166.039	177.412	469.98	451.785	397.96	1.94701e-75	1.08627	up
WBGene00015133	mrpl-11	3436	4027	4086	2034	2185	2086	138.81	142.546	137.439	71.6789	72.3303	70.3794	1.96409e-75	-1.21561	down
WBGene00020135	aakg-4	437	460	562	2242	2193	2122	6.6189	6.05478	6.98481	30.5478	28.1074	27.683	2.16027e-75	1.81437	up
WBGene00020301	T07D1.2	1204	1317	1544	4167	4395	4310	19.733	18.914	21.0655	59.6399	59.0252	58.9864	4.32333e-75	1.31552	up
WBGene00022274	Y73E7A.8	1701	2207	2752	688	675	643	19.8544	22.572	26.7489	7.00796	6.45367	6.26165	4.86066e-75	-2.04875	down
WBGene00011527	cchl-1	4653	4868	5428	2462	2628	2823	111.672	102.113	108.658	51.5013	51.8544	56.1127	7.09776e-75	-1.26067	down
WBGene00000107	alh-1	14034	13805	14728	36867	37304	36183	240.286	207.917	210.492	552.417	524.868	518.271	1.0356e-74	1.0216	up
WBGene00022798	fahd-1	796	928	975	3168	3299	3012	24.117	24.636	24.5708	83.6353	92.4218	84.8338	1.20318e-74	1.46196	up
WBGene00017241	pcyt-1	2348	2729	2949	1094	1125	1263	46.9413	47.8067	48.9302	19.0314	18.4307	21.0413	1.33724e-74	-1.54111	down
WBGene00001768	gst-20	3362	3307	3194	1264	1158	1319	114.342	98.5748	90.4755	37.5003	32.2649	37.4639	1.41907e-74	-1.74223	down
WBGene00019644	cpt-4	523	608	799	55	83	64	6.25008	6.36791	7.96066	0.564834	0.813137	0.632865	1.49111e-74	-3.51227	down
WBGene00008435	glna-2	513	499	618	2277	2507	2303	6.87343	5.87911	6.90616	26.7389	27.5175	25.8165	2.16557e-74	1.76402	up
WBGene00000896	dad-1	3326	3576	3825	1666	1827	1911	194.172	182.966	185.991	84.836	87.3977	93.1914	2.93204e-74	-1.33201	down
WBGene00022373	mrpl-15	4674	5079	5738	2649	2283	2192	126.473	120.445	129.317	62.557	50.6349	49.5306	3.84229e-74	-1.45794	down
WBGene00002827	let-653	3812	4508	5763	1430	1786	1844	42.9059	44.6226	53.6838	14.0813	16.5251	17.533	4.0494e-74	-1.80331	down
WBGene00014125	ZK863.8	1021	982	1014	4101	4035	3676	38.9098	32.7845	32.1925	136.429	126.077	117.036	4.38185e-74	1.60956	up
WBGene00004810	skr-4	102	91	109	1044	1274	929	4.15272	3.24683	3.6895	37.1605	42.5866	31.6533	4.62138e-74	3.02338	up
WBGene00011733	T12D8.5	382	470	364	2115	2588	2392	22.4127	24.1935	17.7967	108.402	124.638	117.341	6.82093e-74	2.17266	up
WBGene00044107	F58G6.9	1355	1411	1538	493	439	412	52.0952	48.0004	48.6417	17.4071	14.9889	14.038	8.94553e-74	-2.01064	down
WBGene00000928	dao-2	10346	13895	16020	1857	2516	2400	542.351	640.18	700.141	84.9653	107.776	104.392	1.30529e-73	-2.86415	down
WBGene00009092	tomm-20	4437	4697	5201	2267	2202	2571	167.548	155.418	163.568	74.7025	68.1473	81.0565	1.41023e-73	-1.36658	down
WBGene00018953	F56C9.10	3447	3797	4250	9971	10125	9423	26.4832	25.4853	27.114	66.5071	62.7389	60.395	1.68013e-72	1.01457	up
WBGene00013805	bca-2	1893	1965	2143	5681	5688	5699	58.4445	53.2292	54.4068	155.6	142.785	147.982	2.44975e-72	1.15802	up
WBGene00004135	pqn-48	1967	2418	2389	6493	6497	6355	50.9809	54.9341	51.5706	146.898	138.07	137.609	2.49033e-72	1.1668	up
WBGene00018145	F37C4.5	3489	3568	4495	10561	11399	11420	54.584	48.8566	58.5601	144.152	146.152	149.206	2.58837e-72	1.18455	up
WBGene00012149	VF13D12L.3	1020	1059	1111	3430	3952	3639	20.8194	18.9233	18.9609	60.6313	65.664	62.002	2.5997e-72	1.43346	up
WBGene00019246	rpb-5	2763	3270	3406	1587	1697	1530	89.4852	92.8196	91.8725	44.85	45.036	41.3886	2.67699e-72	-1.31159	down
WBGene00017724	F22F7.7	581	593	653	2323	2494	2606	13.9317	11.544	12.0986	45.0864	45.4599	48.3905	3.20959e-72	1.66617	up
WBGene00007784	ruvb-1	4316	4274	4701	1809	2295	1967	67.3108	58.4145	61.0552	24.6143	29.3309	25.6139	3.26398e-72	-1.47585	down
WBGene00006996	zyg-11	1696	1695	1994	6582	6811	5570	16.8886	14.7892	16.5008	57.1742	55.5243	46.2915	5.27349e-72	1.46342	up
WBGene00003530	nas-11	1035	1228	1388	4522	4163	4099	15.9592	16.59	17.8256	60.8586	52.6231	52.7974	5.45442e-72	1.46178	up
Caenorhabditis_elegans_newGene_589	-	96	57	99	1042	1247	1001	1.64968	0.626658	0.990579	10.7013	12.0561	9.87046	5.91587e-72	3.28429	up
WBGene00002080	xpo-3	3899	4820	5098	2465	2577	2341	32.0534	33.6729	33.9783	17.393	16.9901	15.5945	6.68363e-72	-1.24245	down
WBGene00001840	hel-1	19754	22347	24665	12546	13870	14761	360.727	357.614	375.113	199.909	207.6	225.114	1.01564e-71	-1.03904	down
WBGene00019351	lron-7	2050	2234	2414	6274	6787	5971	28.7553	27.6643	28.4711	77.46	78.6398	70.853	1.218e-71	1.15711	up
WBGene00021171	Y8A9A.2	436	532	626	2739	2394	2969	2.91255	3.11273	3.4799	15.9634	13.1074	16.5644	1.88438e-71	1.99322	up
WBGene00017989	nol-10	3184	3421	3943	1517	1471	1745	35.581	33.4951	36.6947	14.7879	13.4729	16.2819	3.17235e-71	-1.49302	down
WBGene00014083	ZK795.3	2356	2131	2652	914	934	945	64.058	50.7862	60.0487	21.6739	20.8004	21.4631	3.18622e-71	-1.69307	down
WBGene00002258	lbp-6	11323	13269	14057	7411	8379	8444	590.464	606.355	610.433	337.189	358.109	367.712	3.58637e-71	-1.01571	down
WBGene00003553	nas-37	2458	3075	3968	1136	1086	1117	27.9307	30.8825	38.1563	11.3948	10.136	10.7475	6.37156e-71	-1.82967	down
Caenorhabditis_elegans_newGene_1482	-	2816	3062	3248	7992	8133	7612	109.905	104.729	105.583	272.226	260.223	248.143	7.66115e-71	1.03038	up
WBGene00010336	acox-1.6	493	521	482	2119	2420	2336	6.53704	6.05472	5.32097	24.5281	26.3154	25.8732	8.35961e-71	1.836	up
WBGene00001234	eif-6	5053	5464	5631	2470	3065	2822	143.95	136.629	132.582	61.2513	71.1646	66.7717	9.80981e-71	-1.29582	down
WBGene00044324	ufm-1	1856	1964	2152	710	748	854	111.141	103.093	107.329	37.0767	36.7098	42.6976	1.24518e-70	-1.70595	down
WBGene00003681	nhr-91	2242	2572	2800	1142	1109	1232	33.5041	34.161	38.3791	14.8868	15.2453	15.3563	2.37401e-70	-1.46515	down
WBGene00012936	pola-1	2990	3347	3707	1701	1783	1850	17.9448	17.6017	18.53	8.90917	8.7732	9.26996	3.17987e-70	-1.25321	down
WBGene00008860	romo-1	1820	1868	1880	572	655	713	135.548	121.969	116.644	37.1778	39.9642	44.3684	3.36703e-70	-1.8601	down
WBGene00011330	T01D3.6	5870	6697	6694	15705	18398	16264	56.0971	56.0822	53.2817	130.978	143.928	129.645	3.47228e-70	1.03638	up
WBGene00006607	tre-1	2298	2499	2834	7398	7307	6736	29.4568	28.0664	30.2532	82.7584	76.7821	72.121	9.46215e-70	1.14344	up
WBGene00001427	fkb-2	19243	21223	21513	10856	12774	13057	1061.18	1025.62	987.99	522.375	577.366	601.333	1.02561e-69	-1.10278	down
WBGene00021754	hpo-29	5480	5438	6407	3218	3390	3042	46.7741	40.6764	45.5411	23.9646	23.7163	21.6813	1.21199e-69	-1.18807	down
WBGene00019780	M60.4	3565	3774	3758	9969	12206	11360	158.269	146.623	139.139	385.72	444.306	421.157	3.88968e-69	1.24006	up
WBGene00007564	mrps-22	3074	3389	3501	1565	1850	1618	59.7735	57.7643	56.7027	26.5553	29.4781	26.2674	4.51051e-69	-1.32913	down
WBGene00007450	C08F11.1	217	148	229	1585	1518	1575	8.62237	5.16047	7.58505	55.138	49.6029	52.4264	6.31477e-69	2.59227	up
WBGene00020216	trap-2	9943	11521	13462	6233	6424	7071	337.436	342.608	380.465	184.565	178.673	200.396	6.49998e-69	-1.161	down
WBGene00018911	F56A4.3	730	958	1062	188	184	216	51.4761	59.205	62.3465	11.5311	10.6069	12.6736	8.62921e-69	-2.53006	down
WBGene00010545	cbp-2	67	60	83	1117	1246	761	1.49401	1.17275	1.54788	22.0538	23.0447	14.4351	2.09718e-68	3.46175	up
WBGene00014244	ZK1307.1	4152	5486	6407	2287	2476	2121	114.128	132.166	146.686	54.8599	55.7801	48.6928	2.12954e-68	-1.54921	down
WBGene00002019	hsp-16.48	937	873	910	141	189	115	60.2425	49.1756	48.7393	7.90201	9.93417	6.15426	2.45388e-68	-2.91776	down
WBGene00008032	C39E9.8	2609	2493	2777	7562	8111	7430	65.2544	54.4015	58.7072	163.198	171.986	153.095	3.15721e-68	1.19791	up
WBGene00020886	ttr-6	1007	1061	1083	4130	5561	4110	48.6464	44.9366	43.583	174.195	220.309	165.912	3.48456e-68	1.76748	up
WBGene00020166	T02G5.7	5822	5913	7084	15837	15860	16436	123.515	109.941	125.156	293.196	275.815	291.231	4.28933e-68	1.00817	up
WBGene00013905	ugt-4	58	33	71	1043	1075	769	0.92316	0.457739	0.945379	14.6297	14.168	10.321	5.74158e-68	3.70134	up
WBGene00002020	hsp-16.49	950	867	913	137	191	117	61.1214	48.8362	48.8881	7.67631	10.0354	6.25421	1.68907e-67	-2.92294	down
WBGene00021156	Y4C6B.2	166	154	159	1988	1950	1196	2.89724	2.42655	2.32389	30.5496	28.8372	17.4611	1.92925e-67	3.0119	up
WBGene00022103	cdh-12	6289	8701	10603	3550	3393	3433	19.5432	23.6955	27.442	9.62581	8.641	8.91015	2.35297e-67	-1.6245	down
WBGene00013698	Y106G6D.1	77	143	102	1283	1122	1068	1.77435	2.90666	1.96477	26.0394	21.38	20.7348	2.3562e-67	3.03269	up
WBGene00021715	Y49F6B.2	1421	1473	1510	456	558	518	46.5127	42.2349	41.1534	13.0124	14.9649	14.1581	6.38877e-67	-1.86141	down
WBGene00001068	dpy-6	12296	12998	16715	7922	8355	8087	84.5676	78.3408	95.7397	47.544	47.0979	46.453	1.58903e-66	-1.12372	down
WBGene00006351	sur-5	7230	7500	8272	4531	4883	5009	80.9908	73.553	77.0609	44.2083	44.8936	46.9442	1.72779e-66	-1.01876	down
WBGene00008151	rrp-1	3327	3431	3740	1796	1989	1729	69.8801	63.1538	65.4307	32.9154	34.2497	30.3326	2.05627e-66	-1.2735	down
WBGene00004978	spg-7	5485	6262	7584	3460	3731	3628	52.2544	52.2832	60.1793	28.7612	29.1391	28.8666	2.45427e-66	-1.1741	down
WBGene00077701	poml-3	536	455	475	2401	2423	2412	12.188	9.05685	8.99291	47.68	45.2017	45.8479	3.21308e-66	1.93252	up
WBGene00013267	Y57A10A.27	2297	2546	2416	1037	1128	1133	47.1863	45.8164	41.331	18.5778	18.9864	19.4285	5.16264e-66	-1.48167	down
WBGene00015074	natc-2	3919	3894	4563	10238	11146	10968	103.913	90.6279	100.943	237.452	242.396	240.664	5.2406e-66	1.03681	up
WBGene00018890	F55F8.2	3483	3503	3774	1930	1949	1933	41.1721	36.2893	37.1564	19.9029	18.8821	19.0855	7.0358e-66	-1.23391	down
WBGene00001077	dpy-18	5340	6458	7865	3119	3527	3274	80.6558	85.4862	98.9409	41.1077	43.6598	41.294	8.84321e-66	-1.32025	down
WBGene00016644	abhd-3.2	4517	4613	4749	2422	2353	2575	83.6452	73.4585	74.5333	42.0261	35.4345	40.9117	1.22184e-65	-1.26269	down
WBGene00004138	pqn-53	3336	3945	3893	9329	11008	10724	72.024	74.6576	70.0106	175.798	194.857	193.407	1.42946e-65	1.12501	up
WBGene00006512	abcf-1	5046	5467	5839	3394	3316	3087	69.1507	65.6545	66.6394	40.5891	37.25	35.3308	1.69426e-65	-1.08273	down
WBGene00003738	nid-1	5180	5435	6093	3260	3551	3521	34.644	31.2987	33.5149	18.0215	18.1934	18.7175	2.34148e-65	-1.03768	down
WBGene00012465	Y17G7B.12	1422	1557	1576	588	602	622	43.6612	41.8952	40.3058	15.7407	15.1364	15.952	2.4697e-65	-1.66805	down
WBGene00007440	C08E8.4	30	38	53	724	712	592	0.88568	0.978207	1.28552	18.6984	17.2924	14.6402	2.8937e-65	3.62389	up
WBGene00007455	ugt-22	3361	4082	4491	1992	1674	1795	45.4545	48.3791	50.5807	23.4994	18.5512	20.2739	3.66294e-65	-1.46028	down
WBGene00001430	fkb-5	4771	6505	7889	2113	2427	2668	140.085	161.177	183.943	51.1548	56.6582	62.7936	4.18785e-65	-1.73265	down
WBGene00015298	rml-4	4881	6076	7467	2769	3043	2969	69.7919	76.4041	89.0615	34.6173	35.6903	35.3066	6.10723e-65	-1.3994	down
WBGene00017467	F14F9.4	110	98	84	1137	961	950	1.06312	0.831063	0.674763	9.66236	7.67435	7.72562	6.73996e-65	2.97167	up
WBGene00003119	mac-1	3692	4162	4078	2184	2374	2221	39.6953	39.216	36.5125	20.4857	20.9146	19.936	7.90497e-65	-1.161	down
WBGene00011270	R31.2	2495	2703	2832	7296	7341	6748	42.6718	40.8226	47.7765	150.537	147.775	137.151	7.92058e-65	1.06348	up
WBGene00044789	T07A9.14	3740	4170	4165	2148	1919	2128	108.484	106.004	100.617	54.374	45.6179	51.5578	8.66378e-65	-1.30465	down
WBGene00010052	F54D5.7	5076	5152	6048	2912	3081	3255	102.766	91.4689	101.896	51.5144	51.1225	55.0789	8.68758e-65	-1.15814	down
WBGene00022246	acp-7	229	284	368	1805	2201	1621	4.30529	4.68238	5.77451	29.6677	33.9841	25.4975	8.74813e-65	2.31064	up
WBGene00019357	cpg-8	457	627	763	2885	3187	2706	22.7396	27.4342	30.9999	117.316	128.35	106.76	9.25197e-65	1.89932	up
WBGene00008486	ugt-44	594	664	650	2306	2807	2498	9.06307	8.87865	8.2622	30.7217	35.1297	31.8557	9.37994e-65	1.63717	up
WBGene00010262	droe-4	1967	1706	1933	6268	6886	7363	72.7689	55.3044	59.5663	202.419	208.886	227.566	1.63983e-64	1.51044	up
WBGene00013668	slc-30A5	3825	4322	4760	2532	2619	2357	41.0426	40.6432	42.5331	23.702	23.0318	21.1238	1.66245e-64	-1.12268	down
WBGene00022146	rml-5	3560	4130	5163	1998	2195	1995	79.7706	81.0579	96.4581	39.0227	40.2716	37.3049	1.68531e-64	-1.38745	down
WBGene00009595	cbp-3	631	675	811	2734	2917	2478	17.7506	17.2798	20.8805	72.3108	72.3733	57.8181	2.21292e-64	1.58877	up
WBGene00004916	snr-3	3936	4355	4369	2121	2257	2445	175.039	169.722	161.931	82.2822	82.2541	90.7873	2.4284e-64	-1.23583	down
WBGene00001774	gst-26	2724	3120	3456	1551	1584	1706	105.516	106.14	111.544	52.4863	50.3429	55.0259	2.66427e-64	-1.28024	down
WBGene00006984	zig-7	323	307	313	1752	2053	1573	10.8659	9.05062	8.78258	51.5436	56.7427	44.2877	3.02311e-64	2.13685	up
WBGene00020600	trd-1	2903	3089	3504	1651	1735	1496	32.1532	29.9805	32.3254	15.9534	15.7521	13.8335	3.93266e-64	-1.30079	down
WBGene00016493	C37A2.7	30883	38674	34845	19582	22161	21645	1911.73	2097.96	1796.35	1057.73	1124.4	1118.99	4.82453e-64	-1.06491	down
WBGene00013220	ctl-3	297	473	446	2076	2185	2036	5.24746	7.468	6.60121	32.0001	31.9658	30.2177	5.15874e-64	2.01694	up
WBGene00006686	twk-34	179	220	297	1444	1663	2008	2.32406	2.51296	3.22224	16.424	17.7762	21.8635	6.18856e-64	2.50797	up
WBGene00001156	ech-7	6286	6809	7421	3378	3932	4135	223.404	212.073	219.66	104.745	114.544	122.738	6.26756e-64	-1.18516	down
WBGene00016716	acs-17	2024	2294	2603	6952	7483	6222	21.5755	21.6788	23.3982	65.0968	63.4301	53.7121	7.67432e-64	1.23016	up
WBGene00000991	dhs-28	3752	4570	4759	10590	12289	12107	74.003	78.9918	78.1775	182.274	198.682	199.446	1.13698e-63	1.07291	up
WBGene00004495	rps-26	48929	61376	57398	32138	35261	36900	3083.35	3387.91	3009.51	1764.81	1818.03	1940.42	1.6536e-63	-1.02856	down
WBGene00010133	F55H12.2	153	245	236	1456	1537	1283	3.05666	4.2937	3.92395	25.4443	25.2347	21.4615	1.76475e-63	2.38584	up
WBGene00004411	rpc-1	4214	4632	4606	2645	2747	2602	26.6965	25.7156	24.2975	14.6219	14.263	13.7658	1.85681e-63	-1.09673	down
Caenorhabditis_elegans_newGene_671	-	264	249	287	1562	1624	1333	6.91892	5.71379	6.27848	35.7919	34.9556	29.2378	1.99518e-63	2.12789	up
WBGene00017565	ddo-2	1264	1197	1601	4401	5054	5039	31.1383	26.6365	34.0634	93.8372	102.89	106.571	2.31421e-63	1.48348	up
WBGene00003599	nhl-3	962	1143	1148	3557	3430	3365	12.2349	12.8442	12.0583	39.1717	35.172	35.1429	2.41824e-63	1.32058	up
WBGene00017789	F25E5.8	2497	2437	2921	8204	8666	7247	77.2141	61.1214	68.8666	160.072	155.372	152.538	2.64175e-63	1.26671	up
WBGene00022131	Y71F9B.13	730	895	844	2829	3059	3347	26.5366	27.096	24.2765	90.9544	92.9932	102.128	1.89489e-62	1.54903	up
WBGene00002079	xpo-2	3202	3571	3833	2011	2144	2125	27.8418	26.7728	27.7009	15.1195	15.0382	15.1852	2.19228e-62	-1.09863	down
WBGene00008971	F20C5.6	465	517	630	2543	2157	2481	8.83806	8.61619	9.97701	42.2141	33.6304	39.4058	3.40906e-62	1.80312	up
WBGene00001775	gst-27	5193	5843	5742	3200	3118	3424	194.498	191.796	179.124	104.574	95.7166	107.091	5.85418e-62	-1.12849	down
WBGene00044318	tag-267	1787	1811	2003	793	884	769	73.0091	64.8449	68.1558	28.2759	29.6021	26.2303	6.15312e-62	-1.5362	down
WBGene00008621	F09C8.1	682	592	593	46	26	68	15.0978	11.4785	10.9248	0.869818	0.461306	1.25658	7.42501e-62	-3.94638	down
WBGene00018286	F41E6.5	279	354	487	2289	2125	1960	5.99659	6.60398	8.73579	41.719	35.6738	34.4554	8.36655e-62	2.15426	up
WBGene00000990	dhs-27	1906	2192	2575	964	865	983	49.7266	50.1235	55.9575	21.9437	18.4886	21.4238	8.81928e-62	-1.5774	down
WBGene00011849	T19H5.4	1069	1333	1593	4360	4930	4384	30.7088	33.1021	37.2495	111.06	114.174	105.298	1.63237e-61	1.43022	up
WBGene00010887	M7.12	212	201	240	1505	1419	1187	6.38424	5.28851	6.00497	39.5831	35.0418	29.8803	1.73561e-61	2.28068	up
WBGene00017347	F10E7.5	4660	4581	4755	2575	2611	2531	162.659	140.02	138.07	78.3184	74.7005	73.6761	1.78696e-61	-1.20676	down
WBGene00006565	tfg-1	4462	5013	5962	2475	2795	2933	70.3279	69.4112	75.5141	33.2325	34.7321	36.8148	2.73157e-61	-1.24942	down
WBGene00020577	T19D12.2	1135	1216	1266	3506	3938	3576	13.4492	12.2563	12.0653	36.0471	37.034	35.442	2.98535e-61	1.2543	up
WBGene00022176	Y71H2AM.11	2602	2595	2915	1205	1357	1390	44.3347	38.7405	41.3622	17.9074	18.9542	19.779	3.8278e-61	-1.38039	down
WBGene00020200	T04A6.1	231	200	239	1930	1785	1306	10.4719	7.94423	9.09563	76.3854	66.3987	49.4244	6.28642e-61	2.5188	up
WBGene00007950	C35A5.6	194	233	138	1709	1559	1549	6.67902	7.0449	3.96174	51.6767	44.2444	44.8113	6.78763e-61	2.68959	up
WBGene00022394	natb-1	1307	1424	1597	470	522	585	57.7306	55.1046	58.7468	18.1145	18.8751	21.5697	9.0006e-61	-1.78844	down
WBGene00007001	tufm-2	2437	2754	2918	1456	1462	1314	45.6868	45.2535	45.5713	23.8206	22.469	20.5731	9.80587e-61	-1.27867	down
WBGene00015993	C18H7.1	45	51	20	3464	4155	3992	0.81758	0.809973	0.295724	56.061	63.2666	61.1315	1.11622e-60	5.75734	up
WBGene00000933	dap-3	4011	4510	4869	2768	2756	2837	89.7514	88.4316	90.7333	54.0422	50.5371	53.0182	1.28094e-60	-1.02134	down
WBGene00000742	col-169	5947	6794	7366	3857	4231	4426	170.734	170.933	176.116	96.6233	99.5643	106.121	2.73776e-60	-1.02591	down
WBGene00009957	F53B2.8	429	522	692	2676	2544	2360	14.6429	15.6043	19.6778	79.7039	71.1825	67.2862	5.6942e-60	1.85653	up
WBGene00004702	rsp-5	3138	3456	3491	1616	1732	1898	106.374	103.1	98.1788	46.5396	46.5589	50.603	7.20717e-60	-1.28606	down
WBGene00001073	dpy-11	11718	14092	17122	8093	8235	8526	263.468	276.41	319.458	158.358	151.101	159.75	7.23704e-60	-1.1223	down
WBGene00011726	lpr-2	494	676	668	2333	2483	2303	4.01101	4.81196	4.51325	16.5365	16.5297	15.6218	8.72943e-60	1.60274	up
WBGene00019090	F59A7.2	72	66	73	727	723	685	4.26622	3.42509	3.62839	37.975	35.4686	34.2556	8.73288e-60	2.9303	up
WBGene00015916	ttc-4	1677	1614	1887	736	741	723	33.124	27.9243	31.0287	12.6731	11.9927	11.9207	9.17539e-60	-1.57402	down
WBGene00006220	str-176	471	379	411	2144	2119	2173	7.87235	5.56011	5.77736	31.5536	29.1303	30.3249	9.54435e-60	1.97732	up
WBGene00012361	mrpl-12	3361	3635	4066	2209	2258	2235	143.255	135.782	144.316	82.165	78.8645	79.5452	1.01181e-59	-1.06512	down
WBGene00020658	argn-1	2289	2488	3015	1130	1310	1062	58.1397	55.3893	63.7812	25.0312	27.2643	22.5284	1.12836e-59	-1.48944	down
WBGene00000767	coq-8	3601	3614	4048	2170	2079	2050	42.2988	37.1961	39.5988	22.2393	20.0092	20.1117	1.59455e-59	-1.1821	down
WBGene00003159	mcm-7	2681	2941	3199	1524	1747	1602	30.4188	29.2501	30.2295	15.0885	16.2507	15.1765	1.67147e-59	-1.1986	down
WBGene00012404	Y6G8.2	239	141	238	1690	1960	1563	2.96123	1.53499	2.46413	18.3422	19.9835	16.2365	1.70911e-59	2.67579	up
WBGene00020383	tin-44	2388	2585	2844	1418	1336	1363	43.1784	40.9639	42.8251	22.361	19.7954	20.5775	2.14128e-59	-1.26518	down
WBGene00009431	dct-17	687	681	717	85	127	138	9.92698	9.79648	8.7066	1.22513	1.73641	1.40892	2.15899e-59	-2.87123	down
WBGene00001523	gbh-2	453	495	520	1907	1963	1807	9.30464	8.91252	8.8942	34.2258	33.0979	31.0389	2.91999e-59	1.59523	up
WBGene00023500	C11H1.9	2054	2325	2936	1046	1143	1065	36.7012	36.4031	43.7035	16.3004	16.7337	15.8863	3.52866e-59	-1.50002	down
WBGene00004059	pmp-2	1325	1496	1579	4051	4052	4152	17.0929	16.9184	16.9702	45.6328	42.8679	44.7595	4.25749e-59	1.12949	up
WBGene00000213	asm-3	1031	1164	1133	392	374	385	15.017	14.9472	13.7891	4.99085	4.49123	4.6647	7.95327e-59	-1.86419	down
WBGene00006574	tin-13	2463	2658	2560	1218	1195	1293	159.536	150.905	138.078	68.8495	63.4312	69.9469	8.77175e-59	-1.39499	down
WBGene00008499	cyp-37A1	465	601	464	2372	2318	2316	8.25173	9.37316	6.85474	36.8414	33.8191	34.4277	1.01367e-58	1.83128	up
WBGene00015915	C17G10.1	1836	1979	1984	868	929	933	32.1861	30.4121	28.8965	13.234	13.2961	13.6614	1.01443e-58	-1.42935	down
WBGene00019827	mop-25.1	2076	2331	2780	7380	7181	6444	34.0499	33.4507	37.8504	105.055	96.0031	87.8887	1.09753e-58	1.20234	up
WBGene00021082	zip-11	415	473	552	48	59	72	9.32733	9.32159	10.3397	0.931614	1.08704	1.35367	1.34632e-58	-3.26488	down
WBGene00007938	C34F6.1	2463	3746	4369	1233	1084	963	19.6351	26.1718	29.0049	8.5743	7.08355	6.41168	2.15787e-58	-1.99891	down
WBGene00002249	lap-1	7196	7205	7421	4394	4635	4228	124.763	109.473	107.154	66.47	65.8607	61.2222	2.18046e-58	-1.06799	down
WBGene00009818	acbp-3	1668	2209	2302	783	894	903	97.57	113.266	112.152	39.9657	42.8686	44.1259	2.40018e-58	-1.59075	down
WBGene00008560	pho-13	623	812	697	121	162	116	11.3491	12.9638	10.5666	1.91178	2.41142	1.75144	4.28304e-58	-2.71839	down
WBGene00021879	clec-83	1102	1374	1396	3774	4450	3903	38.2633	42.0095	40.1897	115.585	127.994	113.378	4.3286e-58	1.29753	up
WBGene00011488	nra-2	6152	7746	8634	4329	4650	4494	92.9638	102.583	108.644	57.0686	57.5894	56.7122	6.93375e-58	-1.07814	down
WBGene00021956	Y57E12AL.1	2241	2408	2831	6205	6556	6341	40.0548	37.7102	42.128	96.7404	95.9988	94.6089	7.62911e-58	1.00645	up
WBGene00000835	cuc-1	1315	1382	1440	517	591	495	88.2284	81.2889	80.4919	30.2658	32.5043	27.7029	7.80609e-58	-1.70585	down
WBGene00009813	haly-1	2678	2838	3304	1352	1392	1591	30.6382	28.4503	31.4813	13.4947	13.0508	15.1966	7.89579e-58	-1.36274	down
WBGene00001813	haf-3	3234	3236	3505	1858	1811	1847	40.1422	35.1922	36.2293	20.1181	18.4215	19.1446	1.60735e-57	-1.1995	down
WBGene00006590	toc-1	2491	2868	3011	1552	1459	1532	39.5355	42.1803	42.1166	22.6598	20.102	21.4637	1.70508e-57	-1.22118	down
WBGene00013900	ugt-18	20	31	48	753	747	519	0.331107	0.438521	0.66097	10.9013	10.1548	7.19681	2.30731e-57	3.86901	up
WBGene00014000	ZK550.6	553	841	737	2731	3180	3074	14.9153	19.8799	16.5511	64.2913	70.3272	69.2604	2.75254e-57	1.72194	up
WBGene00016417	C34F11.8	304	403	374	1533	1770	1866	8.89022	10.3277	9.08916	39.1222	42.4422	45.5824	3.51143e-57	1.89651	up
WBGene00000233	avr-15	1271	1313	1463	3991	4299	3739	18.2745	16.0661	17.1164	49.2604	48.6597	43.4298	5.04187e-57	1.21972	up
WBGene00011344	T01G9.2	720	818	775	2646	2960	2542	12.8954	12.8704	11.5875	41.4479	43.559	38.1145	7.47352e-57	1.45973	up
WBGene00017220	F07F6.8	665	781	762	3444	3195	2597	17.2812	17.8101	16.4958	78.2103	68.1366	56.4445	8.60637e-57	1.70661	up
WBGene00008688	rbm-34	2894	3283	3423	1914	1934	1909	62.8243	62.4602	61.8929	36.2618	34.4065	34.6113	9.82838e-57	-1.08012	down
WBGene00010621	egg-6	1266	1711	1961	603	561	552	10.3934	12.3121	13.4161	4.32092	3.77764	3.78459	1.12437e-56	-1.84414	down
WBGene00021011	W03G1.5	49	35	49	561	692	604	0.87629	0.551902	0.73674	8.87423	10.2842	9.15133	1.26787e-56	3.35523	up
WBGene00013077	ttr-24	1883	2263	2327	5466	5763	5407	91.5888	96.6472	94.2658	229.87	228.121	217.898	1.86143e-56	1.01508	up
WBGene00012007	T25B9.1	2043	2169	2364	1144	1120	1151	44.4158	41.3321	42.8107	21.6949	19.9607	20.8947	2.23622e-56	-1.28638	down
WBGene00004169	pqn-89	1453	1670	1822	4665	5021	4334	23.4564	23.4412	24.3591	65.2025	65.9145	57.9846	2.24093e-56	1.15544	up
WBGene00001001	dis-3	4406	4387	4827	2586	2820	2779	40.1335	34.9927	36.5871	20.536	21.0276	21.0634	2.65042e-56	-1.08113	down
WBGene00045433	F49D11.10	1704	1823	1984	893	811	846	19.7927	18.56	19.1973	9.05371	7.71788	8.20912	4.31808e-56	-1.44977	down
WBGene00019520	K08B12.1	1572	1950	2529	665	769	604	34.5672	37.5733	46.3077	12.7485	13.8426	11.0868	4.40915e-56	-1.88868	down
WBGene00001692	grd-3	864	915	824	2921	3414	3347	34.7154	32.2497	27.5741	102.494	112.545	112.426	4.74453e-56	1.5325	up
WBGene00011870	T20G5.8	850	1075	1150	242	315	206	49.7033	55.0838	56.0361	12.3333	15.0817	10.0511	5.79043e-56	-2.32267	down
WBGene00015369	ugt-51	186	249	236	1482	1326	1170	3.08134	3.6231	3.25942	21.4926	18.0662	16.2351	7.72373e-56	2.19916	up
WBGene00020889	T28C12.2	1097	1157	1158	333	212	254	19.5542	18.078	17.2004	5.18226	3.09148	3.77221	9.92358e-56	-2.40589	down
WBGene00006367	sym-2	4388	4983	5669	2879	3310	3060	54.9095	54.6309	59.0624	31.6175	34.0967	32.0073	1.1759e-55	-1.04204	down
WBGene00012909	spds-1	2837	2897	3327	1368	1554	1659	71.8871	64.0292	70.4057	29.6046	31.5827	34.6965	1.18687e-55	-1.32523	down
WBGene00004219	ptr-4	5146	6563	8360	3177	2821	2667	45.7692	51.151	61.9212	24.6513	20.5617	19.8049	1.26924e-55	-1.53453	down
WBGene00015509	C06A6.4	2090	2054	2874	7759	7431	7293	43.2859	37.2112	49.5266	140.162	126.17	126.04	1.32181e-55	1.33407	up
WBGene00000541	cln-3.3	888	794	663	140	143	127	17.3877	13.9187	10.7548	2.36139	2.21365	1.99958	1.42107e-55	-2.82262	down
WBGene00009660	F43G6.8	237	311	313	1282	1429	1454	6.88195	7.90386	7.55043	32.473	33.9961	35.2532	1.52896e-55	1.91418	up
WBGene00044488	Y54G2A.45	1534	1733	1627	648	744	698	39.7535	39.3783	35.1004	14.6313	15.781	15.0808	1.64969e-55	-1.56828	down
WBGene00020366	acdh-10	2659	2900	3257	7086	8199	7241	53.0037	50.8234	54.2595	123.31	134.351	120.748	1.96156e-55	1.00511	up
WBGene00015403	clec-10	3447	3624	3878	1950	2277	1941	69.4339	62.6802	63.8791	34.2505	37.5142	32.6479	2.03751e-55	-1.1731	down
WBGene00011449	T04H1.2	1965	2029	2350	5386	5936	5401	24.8906	23.1712	25.4355	59.9401	63.0911	56.308	2.18164e-55	1.04919	up
WBGene00019323	teg-4	5445	5560	6503	3586	3627	3820	38.1477	34.1355	37.9399	21.9195	20.8291	22.3518	2.23913e-55	-1.00906	down
WBGene00004025	phy-2	2586	3279	4033	1425	1498	1533	41.4133	46.021	53.7974	19.9156	19.6651	20.5062	3.64525e-55	-1.4783	down
WBGene00010681	mak-1	4989	5585	6034	15548	17088	13323	79.1191	78.2327	79.931	213.648	219.417	175.79	4.57389e-55	1.11899	up
WBGene00004020	pho-1	5806	6793	7310	3921	4195	4486	105.669	108.71	111.134	62.3273	62.2061	67.7226	6.08325e-55	-1.0005	down
WBGene00008224	slrp-1	982	979	1123	3180	3295	3024	40.295	35.1933	38.3696	113.907	110.873	103.666	8.10017e-55	1.2705	up
WBGene00015117	B0294.1	2978	3629	3445	1640	1840	1895	132.002	140.95	127.17	63.4139	66.8543	70.1263	1.05484e-54	-1.24488	down
WBGene00001391	far-7	432	583	500	1957	2247	2068	22.1875	26.2569	21.401	87.9098	94.5036	88.8085	1.24504e-54	1.69089	up
WBGene00003778	nnt-1	181	169	333	5561	6030	5350	1.5603	1.273	2.38779	41.8339	42.6097	38.5172	1.34521e-54	4.1138	up
WBGene00020208	fnip-2	1446	1710	1801	4435	4631	4252	12.9047	13.4079	13.4506	34.5894	33.9722	31.7754	1.39037e-54	1.0787	up
WBGene00011018	R05A10.1	1586	1512	1703	5400	5689	4608	42.2896	35.3276	37.8151	125.674	124.375	102.644	1.51853e-54	1.35237	up
WBGene00011692	T10G3.1	229	260	306	2062	2315	1356	4.69143	4.66658	5.21852	36.9569	38.9735	23.2501	1.80578e-54	2.46798	up
WBGene00001480	fmo-5	373	403	355	1683	1735	1619	5.972	5.64797	4.72239	23.3749	24.8912	21.5433	1.97017e-54	1.78843	up
WBGene00020917	W01B11.6	333	476	408	1723	2014	1809	20.9067	26.2294	21.3597	94.5118	103.804	94.9899	2.74615e-54	1.82765	up
WBGene00022382	Y94H6A.10	5985	6029	6845	1226	1407	898	116.078	102.468	110.557	20.7376	22.3533	14.5362	3.26168e-54	-2.71491	down
WBGene00018744	F53B3.6	5104	5356	6378	3157	3177	3552	100.103	92.064	104.185	54.0205	51.0695	58.1793	3.27468e-54	-1.10819	down
WBGene00002393	lpr-1	802	759	938	212	256	217	19.1278	16.6585	20.3754	4.77973	5.55409	4.60548	3.44924e-54	-2.18854	down
WBGene00044321	mrps-30	5675	5349	5926	2952	3321	3335	93.0264	76.9602	81.0205	42.2065	44.7133	45.7344	3.4819e-54	-1.16696	down
WBGene00044083	tin-9.2	1868	1896	1939	873	758	821	78.4711	70.6645	67.9611	32.1418	25.8527	28.8553	3.72519e-54	-1.5576	down
WBGene00009189	F27D4.4	4570	5224	6086	3276	3020	3076	93.4288	93.5966	103.405	58.4171	50.3761	52.3373	5.59229e-54	-1.09757	down
WBGene00000966	dhs-2	178	227	226	1072	1290	1104	4.20416	4.68532	4.38473	22.0863	24.3208	21.5043	5.61324e-54	2.08918	up
WBGene00021546	laat-1	2749	3285	3449	1785	1648	1509	51.1226	53.5247	53.4135	28.9491	25.108	23.4235	1.28344e-53	-1.27743	down
WBGene00019713	pqn-52	1457	1817	1850	4471	5183	4768	28.4679	31.7831	30.9677	76.8509	80.6112	72.4703	1.50701e-53	1.14509	up
WBGene00008677	F11A5.9	788	663	802	2736	3599	3225	11.6874	8.60939	9.91004	35.4252	43.7717	39.9568	1.55602e-53	1.7176	up
WBGene00010872	M05B5.4	639	522	696	3036	2550	2721	12.5137	8.95863	11.3457	51.8749	40.9373	44.5053	1.64801e-53	1.7985	up
WBGene00010701	ent-2	3445	3661	3668	2097	2207	2137	53.246	49.5938	47.2174	28.277	27.9542	27.5768	1.72801e-53	-1.08878	down
WBGene00004825	skr-19	712	749	1026	3011	2995	2971	18.5079	17.0523	22.2079	68.299	63.8067	64.5035	2.15925e-53	1.50431	up
WBGene00004981	spl-1	5283	5076	5924	2990	2974	3318	82.255	69.263	76.8075	40.626	37.9552	43.1359	2.21675e-53	-1.15479	down
WBGene00011730	drr-2	7081	8152	8546	4480	5317	5286	196.613	198.338	197.611	108.534	121.006	122.56	3.90652e-53	-1.00008	down
WBGene00013111	sta-1	1916	2196	2538	6405	6667	5662	22.9308	23.0143	25.2679	66.9314	65.3196	56.6086	4.38502e-53	1.14833	up
WBGene00004264	qua-1	5664	7974	9662	3617	3467	3330	40.8852	50.4464	58.0858	22.782	20.5105	20.0768	4.42999e-53	-1.48375	down
WBGene00012085	T27D12.1	1243	1430	1931	4991	5238	5602	19.7778	19.6456	25.3808	68.564	67.3674	73.5812	4.83923e-53	1.43852	up
WBGene00016837	syf-1	3942	4136	4661	2655	2506	2647	41.594	38.2426	40.9528	24.4377	21.6684	23.3256	5.34514e-53	-1.04837	down
WBGene00004444	rpl-30	26983	35074	31914	15777	19146	19414	1858.74	2117.57	1833.41	946.826	1077.59	1116.15	5.60819e-53	-1.13268	down
WBGene00021816	Y53G8AR.9	3204	3581	4026	2210	2325	2249	44.6028	43.6969	46.6811	26.8515	26.5335	26.1439	5.82758e-53	-1.0133	down
WBGene00009380	F34H10.3	595	607	727	2650	2465	2200	12.1314	10.8846	12.3535	47.3213	41.3119	37.6297	6.4023e-53	1.56877	up
WBGene00001864	him-5	34	22	35	497	509	526	0.908318	0.518817	0.749977	11.6802	11.2298	11.8437	8.3732e-53	3.59462	up
WBGene00012665	pph-5	3505	3696	4119	2293	2168	2324	59.3003	54.6611	57.5808	33.581	29.8245	32.572	1.05525e-52	-1.08049	down
WBGene00007696	tram-1	6098	6646	8137	4335	3936	3900	109.575	104.957	122.486	68.2592	58.3699	58.9595	1.1152e-52	-1.11519	down
WBGene00009835	F47H4.2	507	570	749	3000	3507	2374	4.34291	4.28493	5.34746	22.4633	24.666	17.0848	1.3938e-52	1.92333	up
WBGene00020649	sma-10	1496	1484	1700	4218	4363	4204	14.8692	12.976	14.1257	36.9555	35.6814	35.0633	1.60253e-52	1.09889	up
WBGene00008354	gcsh-1	1451	1591	1799	616	782	655	79.8362	76.7296	82.4578	29.5426	35.2515	30.0961	1.71237e-52	-1.57336	down
WBGene00014120	ZK858.7	1946	2354	2354	1055	1187	1184	37.6622	39.911	37.9419	17.8093	18.8194	19.1268	1.80669e-52	-1.29713	down
WBGene00021818	Y53G8B.2	74	132	155	999	1002	970	1.7301	2.71578	3.04624	20.6174	19.4184	19.1475	1.9222e-52	2.66016	up
WBGene00004450	rpl-36	35341	44362	39763	19969	22942	25319	2807.83	3089.64	2630.61	1382.61	1494.79	1679.94	2.92762e-52	-1.15158	down
WBGene00006613	trm-1	2078	2222	2502	1240	1269	1257	31.4214	29.4365	31.5009	16.3612	15.7278	15.8742	3.00155e-52	-1.19364	down
WBGene00007355	rpb-6	2452	3081	2870	1378	1426	1534	115.473	127.166	112.593	56.6059	55.0261	60.3522	3.68324e-52	-1.29347	down
WBGene00007215	oxa-1	2658	3225	3225	1778	1683	1628	46.2889	49.2158	46.7638	27.0057	24.0152	23.6757	4.47585e-52	-1.1792	down
WBGene00022738	fubl-2	6013	7332	7461	4040	4435	4673	90.105	96.2486	93.1467	52.695	54.3733	58.3471	5.51488e-52	-1.00332	down
WBGene00022396	Y97E10AR.1	647	628	713	2764	2442	2324	7.36748	6.25648	6.76744	27.5232	22.8267	22.1214	6.82067e-52	1.56397	up
WBGene00010638	K07F5.14	1558	2056	1964	850	854	860	31.9168	36.9201	33.5162	15.1914	14.3421	14.7173	7.25216e-52	-1.45568	down
WBGene00009626	F42A8.1	477	656	705	2394	2425	2186	10.2008	12.291	12.5462	44.696	42.5171	39.0535	1.1733e-51	1.58158	up
WBGene00012834	Y43F8C.13	2555	2907	3152	1599	1564	1717	63.3338	63.1445	65.0733	34.5758	31.7771	35.5386	1.38104e-51	-1.1591	down
WBGene00017816	hrpk-1	4521	5163	5728	3079	3070	3405	71.4336	71.9256	75.9242	43.7899	41.4046	45.9997	1.55384e-51	-1.02945	down
WBGene00001983	hoe-1	2938	2863	2960	1442	1585	1574	30.3608	25.9241	25.4777	12.9931	13.3942	13.5817	2.48643e-51	-1.27637	down
WBGene00006603	tps-2	3601	3953	4515	10901	11120	9387	27.0142	25.1413	27.2393	69.9776	67.6013	57.4902	3.25985e-51	1.03302	up
WBGene00004987	spp-2	864	971	916	2921	3202	2768	48.7809	48.0398	43.0795	143.985	148.24	130.569	3.68448e-51	1.33613	up
WBGene00007666	C18B12.4	935	1201	1200	3251	3587	3226	14.9113	16.7915	15.9543	45.2783	46.9313	43.011	4.3084e-51	1.24454	up
WBGene00302993	T14B4.19	687	899	1018	257	236	250	42.011	48.2138	51.8717	13.7291	11.8367	12.7543	4.50781e-51	-2.11963	down
WBGene00018762	F53E10.6	1933	2170	2009	573	776	840	80.3069	78.9884	69.5101	20.77	26.4025	29.1344	4.90258e-51	-1.81719	down
WBGene00003815	nars-1	6581	7920	8442	4764	4554	5143	101.443	106.992	108.378	64.0797	57.5362	66.2023	5.46349e-51	-1.00451	down
WBGene00016004	C18H9.6	877	962	1026	350	352	307	31.3116	30.0962	30.5108	10.8904	10.3027	9.13171	5.89288e-51	-1.83508	down
WBGene00004917	snr-4	3223	3514	3836	2073	2031	2235	132.229	126.623	135.387	75.1188	72.9454	76.7198	7.63626e-51	-1.07957	down
WBGene00019272	H42K12.3	3266	4605	5184	2074	2089	1869	53.8181	66.4374	71.1179	29.8296	28.2116	25.6884	9.2645e-51	-1.43978	down
WBGene00013654	Y105C5B.15	694	793	776	229	230	227	14.7107	14.8228	13.6798	4.23105	4.00567	3.99957	1.06688e-50	-2.04585	down
WBGene00015067	cest-35.1	197	298	252	1355	1347	1245	3.03694	4.01938	3.22963	18.2287	17.0233	16.0272	1.13055e-50	2.03613	up
WBGene00009057	cept-1	1920	2258	2415	1029	1129	1207	36.0736	37.1715	37.7861	16.8634	17.3819	18.9395	1.30249e-50	-1.30779	down
WBGene00021253	Y22D7AL.15	384	450	415	1784	1862	1562	19.7934	20.3328	17.8163	80.236	78.7003	67.2268	1.38118e-50	1.69809	up
WBGene00021167	cyp-32B1	45	101	42	911	882	912	0.781027	1.5422	0.602956	13.9211	12.6577	13.3349	1.38558e-50	3.38806	up
WBGene00001476	fmo-1	736	774	1141	3432	3901	3245	11.5468	10.8988	15.4957	47.6931	51.8101	43.2658	1.645e-50	1.64688	up
WBGene00015947	C18A11.1	73	90	109	697	788	681	2.58254	2.79669	3.21016	21.6481	23.0036	20.2591	1.83714e-50	2.60304	up
WBGene00017071	aagr-1	1540	1571	2023	4885	4840	5065	15.0553	13.1103	16.4883	41.5977	37.524	39.9507	2.15152e-50	1.18024	up
WBGene00015282	C01B10.8	3672	3650	4025	2248	2402	2154	48.0453	41.9675	43.807	25.6084	25.7379	23.5009	2.69482e-50	-1.08396	down
WBGene00016142	mrps-18C	3850	4196	4545	2750	2554	2633	78.3889	74.8596	77.0686	48.8452	42.6177	44.7734	3.50705e-50	-1.00785	down
WBGene00006431	tag-52	455	707	625	2619	2911	2306	5.7096	7.78113	6.54148	28.7191	29.9859	24.2092	3.91501e-50	1.77617	up
WBGene00019332	K02F3.9	645	849	789	2608	2500	2671	30.4016	35.1041	30.9835	107.36	96.6875	105.226	4.83596e-50	1.41771	up
WBGene00020389	T10B5.3	3675	4380	4250	2556	2457	2561	85.2764	89.193	82.2602	51.8322	46.662	49.5535	5.40274e-50	-1.04247	down
WBGene00022591	cuti-1	1220	1368	1797	572	529	481	47.5924	46.7969	58.409	19.4688	16.9261	15.6606	6.03967e-50	-1.79173	down
WBGene00000103	akt-2	1372	1499	1514	4450	4468	3866	19.0083	18.2142	17.483	53.6368	50.4311	44.436	6.56332e-50	1.19094	up
WBGene00021158	Y4C6B.4	213	187	173	1137	1318	1099	3.37089	2.52898	2.19451	15.2206	16.5965	14.5557	6.62515e-50	2.24253	up
WBGene00006916	vha-7	982	972	1020	2937	3089	2985	7.1794	6.889	6.15374	20.8238	20.5641	20.6289	7.26136e-50	1.24349	up
WBGene00003091	lys-2	3350	3509	3668	2181	2244	2097	100.31	92.0758	91.4905	56.9891	55.0718	52.4441	7.61495e-50	-1.03651	down
WBGene00010277	F58G6.7	2256	2090	2509	1129	1070	1132	75.7124	61.4737	70.1298	33.0613	29.413	31.7218	8.63565e-50	-1.38202	down
WBGene00013284	daf-22	1616	1893	2088	4702	4826	5111	33.5767	34.4717	36.1345	85.2933	82.2215	88.7271	2.01222e-49	1.04171	up
WBGene00019963	R08E5.3	354	525	532	1938	2229	2633	4.13549	5.36749	5.17657	19.7609	21.3479	25.6968	2.01415e-49	1.91173	up
WBGene00007623	C16C10.2	1803	1825	2039	908	926	759	53.9175	47.844	50.7881	23.7034	22.7007	18.9486	2.23872e-49	-1.46729	down
WBGene00017830	rpb-8	2256	2453	2262	965	1146	1153	88.0498	83.8867	73.5149	32.867	36.6551	37.5747	2.39175e-49	-1.43916	down
Caenorhabditis_elegans_newGene_1587	-	653	757	742	2281	2500	2212	3.8218	3.87438	3.61144	11.6298	12.0111	10.8314	2.70983e-49	1.346	up
WBGene00006724	ubh-4	2499	2906	3046	1412	1459	1667	64.016	65.2318	64.981	31.5551	30.6194	35.645	3.39786e-49	-1.23586	down
WBGene00008963	F19H8.2	3762	4154	5100	2456	2598	2664	98.8061	95.6179	111.566	56.286	55.93	58.4482	4.58172e-49	-1.09106	down
WBGene00010835	M03B6.3	1411	1954	2465	624	594	709	19.2792	23.3885	28.0519	7.43353	6.64645	8.08098	5.69313e-49	-1.90692	down
WBGene00019836	R02F2.7	2238	2132	2245	1087	1079	959	28.0068	23.3664	23.4138	11.859	11.0638	10.0197	6.07504e-49	-1.42627	down
WBGene00006760	unc-23	5967	5591	6852	3572	3986	3634	88.285	72.653	83.8514	46.8403	48.0954	45.8413	7.84641e-49	-1.0632	down
WBGene00004496	rps-27	15725	20659	18181	8551	10561	10897	1237.92	1425.41	1191.82	587.271	681.526	720.191	8.66523e-49	-1.20466	down
WBGene00003155	mcm-3	2363	2506	2790	1410	1507	1539	24.4607	22.7253	24.046	12.7296	12.7817	13.2976	9.2842e-49	-1.12357	down
WBGene00020139	eppl-1	5696	6111	6145	3047	3918	3470	104.918	98.6502	94.4092	49.0772	59.2891	53.3644	1.61191e-48	-1.13007	down
WBGene00018960	ilcr-2	3440	3630	3692	2165	2183	2269	38.7029	35.7932	34.5989	21.25	20.1282	21.3215	1.64492e-48	-1.0476	down
WBGene00019113	F59E11.7	85	99	110	772	1152	739	2.59252	2.31081	2.70688	18.1345	25.408	16.5984	1.98824e-48	2.76921	up
WBGene00016093	srsx-34	398	339	471	1681	1841	1678	5.94781	4.46605	5.79286	21.4808	22.1488	20.8718	2.72302e-48	1.74348	up
WBGene00009653	F43D9.1	2037	2232	2612	1229	1133	1238	14.2464	13.679	15.2171	7.49937	6.49371	7.23127	3.06375e-48	-1.27053	down
WBGene00000970	dhs-6	1391	1528	1783	4103	4199	4011	26.5723	25.5924	28.3689	68.4284	65.7874	64.0212	3.14162e-48	1.04259	up
WBGene00001699	grd-10	1667	1766	1745	4626	4831	5333	82.4159	76.5131	71.8434	199.599	195.831	220.237	3.33913e-48	1.15989	up
WBGene00007175	B0395.3	1139	1404	1210	3862	3835	3777	15.4895	16.6541	13.688	45.5337	42.5496	42.7572	3.62854e-48	1.25832	up
WBGene00010422	H32K16.2	95	178	116	965	1047	1088	6.02044	9.95567	6.17152	53.8884	54.9416	58.1779	3.70712e-48	2.59953	up
WBGene00017195	glo-4	1798	1747	1839	4785	5455	4897	10.8726	9.26191	9.26577	25.2599	27.0476	24.7436	3.74142e-48	1.13473	up
WBGene00018393	msra-1	1151	985	1236	3799	3656	3674	45.2908	34.2969	40.9091	130.38	118.099	121.408	4.92459e-48	1.36576	up
WBGene00008415	mce-1	1600	1806	2023	5626	5208	4690	53.7657	53.1733	56.6102	164.975	143.458	131.641	1.04759e-47	1.16864	up
WBGene00007017	mdt-17	2937	2830	3401	1748	1794	1747	34.763	29.3227	33.5335	18.1581	17.3783	17.2608	1.66834e-47	-1.13652	down
WBGene00007900	C33D9.6	993	1000	1283	3654	3490	3217	8.93369	7.90883	9.61981	28.6883	25.769	24.1666	1.72797e-47	1.31218	up
WBGene00017855	F27C1.6	4608	4537	5122	2907	3228	2866	59.5366	51.3566	55.1051	32.799	34.1947	30.9488	2.42521e-47	-1.01103	down
WBGene00021709	ugt-29	65	100	88	783	679	670	0.885038	1.28357	0.951933	9.71026	8.50373	8.10629	2.59136e-47	2.67712	up
WBGene00020561	T19C3.3	2257	2715	2881	1445	1616	1517	147.566	155.573	156.909	82.4574	86.5809	82.8248	2.64645e-47	-1.11788	down
WBGene00017342	F10D7.5	830	850	1014	2695	2789	2586	9.71044	8.71505	9.88628	27.7159	27.0063	25.2921	3.45678e-47	1.23231	up
WBGene00021888	manf-1	2886	3649	3564	1492	1967	1553	113.604	125.875	116.823	51.242	63.4409	51.0535	7.95748e-47	-1.34967	down
WBGene00013892	ZC434.4	1506	1512	1730	765	782	794	44.7467	39.363	42.8079	19.8217	19.0511	19.7104	8.38635e-47	-1.35988	down
WBGene00002229	klp-19	2428	2859	3311	1636	1693	1656	18.7591	19.3594	21.3021	11.0262	10.7218	10.6815	8.82759e-47	-1.12263	down
WBGene00020142	aak-2	2947	2756	3087	7457	7700	7412	34.6397	28.6285	30.0789	76.091	73.5811	72.5608	9.92419e-47	1.00643	up
WBGene00003955	pcn-1	3462	4090	4443	2126	2381	2554	97.0731	100.52	103.759	52.023	54.7337	59.8202	1.05785e-46	-1.10339	down
WBGene00011060	R06C1.6	1181	1196	1289	3311	3553	3270	20.4206	18.1265	18.5639	49.9628	50.3558	47.2257	1.58488e-46	1.11371	up
WBGene00017781	F25E2.3	229	255	312	1216	1315	1121	5.63437	5.50464	6.38866	26.1569	26.578	23.0702	2.35536e-46	1.837	up
WBGene00000733	col-160	6316	7646	6394	17319	18256	18648	158.978	168.675	134.05	385.822	382.258	397.749	2.57554e-46	1.05911	up
WBGene00003609	nhr-10	1279	1159	1622	4137	4503	4211	23.0636	18.3075	24.3581	65.1089	66.5614	63.4218	2.66253e-46	1.31114	up
WBGene00011032	ddx-52	2244	2386	2742	1455	1372	1379	32.5686	30.3472	32.8951	18.2831	16.3189	16.56	2.82076e-46	-1.14909	down
WBGene00017464	sulp-2	373	375	421	1430	1560	1446	4.73457	4.18073	4.45736	15.8769	16.2699	15.3641	2.90746e-46	1.56463	up
WBGene00007365	C06B3.6	531	543	485	6578	6576	4282	15.248	13.8089	11.8017	179.843	172.654	115.391	3.25071e-46	3.03975	up
WBGene00008964	mltn-9	1046	1302	1678	458	506	401	10.4483	11.394	13.9536	3.98484	4.14105	3.34272	4.15638e-46	-1.87563	down
WBGene00014030	glb-1	1454	1562	1542	3884	4624	4269	67.5596	63.5902	59.6824	157.507	176.147	165.678	5.14745e-46	1.13193	up
WBGene00017374	ttr-41	1359	1644	1575	3887	4637	4265	75.9928	80.5686	73.3394	189.666	212.537	199.165	5.85852e-46	1.13046	up
WBGene00019760	calu-1	8388	10570	12759	5672	6391	6413	190.461	210.419	241.702	112.896	119.127	121.836	6.07617e-46	-1.11173	down
WBGene00016269	C30G4.4	641	705	762	2146	2570	2181	16.5642	16.2026	16.3885	54.329	60.828	52.4173	7.70675e-46	1.35547	up
WBGene00022029	Y65B4A.6	3455	3852	4250	2011	2429	2418	34.1604	35.2676	34.9814	18.2079	20.0632	19.9815	8.98086e-46	-1.09441	down
WBGene00021844	sec-11	2963	3545	3758	1761	2118	2079	114.2	119.732	120.643	59.2266	66.8942	66.9111	1.09925e-45	-1.12473	down
WBGene00045305	ZC250.4	539	929	966	153	103	73	19.0094	28.6968	28.3538	4.69906	2.96487	2.13472	1.10956e-45	-3.11776	down
WBGene00014173	ZK970.7	6	5	18	320	419	473	0.25519	0.202068	0.709221	13.6615	16.7941	19.3076	1.34182e-45	4.67654	up
WBGene00008583	ugt-65	678	770	1115	145	209	213	12.0216	11.9732	16.4776	2.22629	3.02734	3.13446	1.38987e-45	-2.46516	down
WBGene00022401	Y97E10AR.6	1585	1494	1874	4936	5254	4407	32.5278	26.8677	32.027	88.4134	88.3854	75.5402	2.74258e-45	1.2069	up
WBGene00016073	C24H12.4	5354	5779	5820	3635	3861	3236	74.1943	70.146	67.1402	43.9483	43.8448	37.4465	3.05944e-45	-1.00615	down
WBGene00020706	atg-9	1270	1698	1707	4255	4381	4220	11.9349	13.9907	13.3721	34.9023	34.2502	33.4308	3.21958e-45	1.11442	up
WBGene00020550	T17H7.1	2236	3265	3970	1309	1047	1058	28.3272	35.9845	41.8377	14.3413	10.7734	11.1053	3.32145e-45	-1.78205	down
WBGene00007112	B0035.13	2981	3066	3473	1951	2036	1790	81.1699	73.5869	78.8648	47.7105	45.4395	41.8846	3.51823e-45	-1.06396	down
WBGene00015525	rha-2	2777	2886	2936	1634	1758	1748	21.1895	19.2978	18.6543	10.881	10.9935	11.1372	3.59401e-45	-1.08883	down
WBGene00010044	F54C9.9	2302	2737	2667	1540	1528	1467	27.2352	28.3787	26.2722	15.8951	14.813	14.4898	3.62159e-45	-1.10661	down
WBGene00010135	F55H12.4	690	885	790	2415	2845	2557	26.1443	29.3977	24.9215	79.9061	88.4125	80.963	4.68102e-45	1.36954	up
WBGene00008610	F09C3.2	1490	1582	1659	4300	4730	3949	41.3702	38.4744	38.3535	104.175	107.643	91.5653	4.68702e-45	1.103	up
Caenorhabditis_elegans_newGene_624	-	155	180	187	1044	941	869	2.82291	2.88151	2.83887	16.6416	14.0854	13.2489	5.07384e-45	2.07905	up
WBGene00003604	nhr-5	341	394	412	1334	1567	1513	4.56715	4.62491	4.59651	15.4606	17.0827	16.8091	5.35644e-45	1.58602	up
WBGene00017991	clec-180	2133	2791	3521	1278	1290	1180	21.1568	24.6611	29.8708	10.9852	10.3735	9.79929	5.85786e-45	-1.49437	down
WBGene00015552	C06G3.6	552	640	748	2122	2228	1991	8.15257	8.28052	9.2043	27.3625	26.9952	24.5796	1.04712e-44	1.35927	up
WBGene00019275	rpac-40	2127	2144	2250	988	1009	1190	47.5172	41.9704	41.862	19.2575	18.4742	22.1905	1.08151e-44	-1.37468	down
WBGene00008447	E01G4.5	177	131	223	1044	1211	1077	3.58385	2.33712	3.77583	18.537	20.1977	18.3049	1.08456e-44	2.26691	up
WBGene00019219	H20J04.4	1568	1532	1836	831	817	790	21.3139	18.2361	20.7554	9.8497	9.12034	8.97616	1.65475e-44	-1.35626	down
WBGene00021830	Y54E10A.10	2596	2675	2883	966	1302	1378	71.944	64.3735	66.3557	23.3336	29.5678	31.7817	1.79333e-44	-1.50097	down
WBGene00007297	C04F12.1	297	363	339	1326	1446	1272	2.67543	2.86311	2.54108	10.4351	10.6936	9.58614	2.57757e-44	1.65604	up
WBGene00021482	Y39H10A.6	1211	1489	1507	3557	3767	3613	13.4877	14.4322	13.8693	35.1118	35.049	34.907	2.9609e-44	1.03104	up
WBGene00013541	lonp-2	281	373	270	1412	1556	1472	3.30369	3.83304	2.64181	14.4848	14.9889	14.4442	3.45314e-44	1.89199	up
WBGene00015160	B0361.6	2074	1857	1973	930	840	860	43.0341	33.7784	34.0987	16.8379	14.2872	14.9081	3.46867e-44	-1.50981	down
WBGene00012550	spcs-2	3048	3162	3786	2052	2097	2126	112.533	103.061	117.269	65.9434	63.8943	65.5967	5.09289e-44	-1.01255	down
WBGene00012423	Y10G11A.1	2215	2610	2517	1454	1456	1389	50.8778	52.5338	48.1645	29.1567	27.4075	26.6573	5.23545e-44	-1.1145	down
WBGene00004448	rpl-34	26472	33703	30219	16636	19629	20403	1785.85	1992.44	1697.75	979.283	1085.36	1149.49	5.49334e-44	-1.01765	down
WBGene00010123	F55G11.2	838	722	909	201	267	245	21.601	16.3046	19.5099	4.5063	5.63685	5.27349	6.19191e-44	-2.11394	down
WBGene00000102	akt-1	2759	2873	2861	8267	8677	6923	36.8989	33.2126	31.3623	95.2195	95.2078	76.3343	6.8982e-44	1.13464	up
WBGene00006948	wrt-2	2318	2996	3550	1535	1377	1409	39.3671	44.5969	50.226	22.7525	19.1639	19.9908	7.19363e-44	-1.36297	down
WBGene00010593	gsnl-1	1566	1782	2131	5075	5130	4551	27.3591	27.2971	31.0218	77.3988	73.4924	66.4343	8.0674e-44	1.08456	up
WBGene00004994	spp-9	637	958	802	175	235	214	51.4447	67.7729	53.9245	12.3194	15.508	14.378	8.07015e-44	-2.24926	down
WBGene00006567	tgt-2	1905	2008	2150	1084	1219	1136	43.562	40.2479	40.9497	21.63	22.8417	21.6849	8.93021e-44	-1.16149	down
WBGene00011801	T16G1.7	114	218	255	3603	4080	3025	2.10638	3.54193	3.92309	58.2916	61.9982	46.8392	9.13073e-44	3.69277	up
WBGene00021425	ppgn-1	2438	2566	2573	1501	1441	1432	28.5254	26.3134	25.0714	15.3218	13.8162	13.9884	1.00651e-43	-1.1375	down
WBGene00015868	C16H3.3	1150	1174	1404	3428	3337	3413	11.6407	10.4037	11.8249	30.2291	27.6538	28.8254	1.07519e-43	1.10046	up
WBGene00007867	C32H11.4	1572	1443	1593	675	612	698	37.1768	29.9031	31.3772	13.9271	11.8586	13.7869	1.39321e-43	-1.55425	down
WBGene00011561	ttr-15	2419	2970	2576	7142	9246	7535	109.115	117.422	96.7831	281.177	341.914	283.911	1.94668e-43	1.22942	up
WBGene00021535	wht-7	327	297	472	1640	1656	1657	4.39884	3.51031	5.30992	19.3664	18.305	18.6896	2.29406e-43	1.8175	up
WBGene00007808	best-7	284	266	292	1136	1251	1269	3.93123	3.22221	3.36561	13.7457	14.2161	14.6888	2.50338e-43	1.75042	up
WBGene00015350	fbxl-1	2878	2911	2962	8170	8400	7007	37.1627	34.4118	33.5081	97.2919	93.7881	79.4103	3.24811e-43	1.07434	up
WBGene00000373	cyp-14A5	599	673	762	2080	2123	2374	9.40641	9.26381	9.97594	28.5389	27.369	31.1767	3.34757e-43	1.34251	up
WBGene00008926	F17H10.2	420	582	530	2105	1805	2060	9.78097	13.9934	10.271	43.0784	34.5641	39.9277	3.4216e-43	1.60806	up
WBGene00007712	mrpl-34	1625	1577	1525	685	748	659	68.1047	57.9252	53.2314	25.0246	25.6792	23.0421	3.70611e-43	-1.52029	down
WBGene00002016	hsp-16.2	386	411	325	45	54	34	18.0514	16.893	12.7023	1.78213	2.0342	1.28115	3.76261e-43	-3.31156	down
WBGene00018602	F48D6.4	970	1185	1368	4415	4670	3385	50.4414	53.8784	59.2292	201.058	199.532	147.364	4.07821e-43	1.47325	up
WBGene00010488	endu-1	494	601	660	2061	2151	1813	13.6855	14.5867	15.2261	49.8762	48.8928	41.9829	4.13664e-43	1.42813	up
WBGene00021638	Y47G6A.9	1365	1494	1515	754	715	705	48.4538	46.4678	44.7649	23.346	20.7963	20.8812	4.98018e-43	-1.34812	down
WBGene00019154	glf-1	2177	3124	3787	1302	1241	1321	36.0262	45.315	52.2006	18.7939	16.8291	18.2508	5.38679e-43	-1.55152	down
WBGene00003622	nhr-23	3077	4088	4618	2057	1769	2067	46.444	53.5351	56.446	26.4851	22.5689	26.7192	5.55996e-43	-1.32642	down
WBGene00017210	F07E5.5	4032	3987	4011	2333	2436	2504	89.2832	77.3678	73.9646	45.0801	44.2129	46.3045	6.07145e-43	-1.07476	down
WBGene00001303	sec-61.G	6727	8913	8136	3842	4754	4853	427.842	496.744	430.905	213.179	247.821	257.745	6.6972e-43	-1.16234	down
WBGene00010624	mrps-15	2172	2512	2907	1413	1575	1447	51.677	52.3685	57.5984	29.3292	30.7202	28.7448	7.03411e-43	-1.11279	down
WBGene00020036	R12E2.11	3613	4235	4274	2123	2557	1885	89.1994	91.9957	88.3029	45.8076	51.8667	38.739	8.50136e-43	-1.22635	down
WBGene00012910	Y46G5A.20	24	40	65	549	972	583	1.17958	1.70093	2.66445	23.7405	39.5117	24.1362	9.71297e-43	3.54103	up
WBGene00001439	fkh-7	2554	2876	3048	7957	8527	6610	26.1279	27.0228	28.1108	65.4461	72.6786	51.4994	1.00521e-42	1.09526	up
WBGene00001477	fmo-2	643	452	520	2533	2418	2758	10.6416	6.55622	7.16961	36.6259	32.8461	38.1703	1.211e-42	1.8728	up
WBGene00004919	snr-6	2022	2652	2366	980	1242	1170	136.384	156.728	132.921	57.6863	68.65	65.919	1.31594e-42	-1.39166	down
WBGene00019212	zmp-2	2046	2962	3430	1287	1170	1079	26.2389	32.9921	36.6965	14.3852	12.5126	12.0045	1.575e-42	-1.5731	down
WBGene00015759	C14C6.5	1230	1722	1519	654	664	615	60.3254	74.076	62.0482	27.9519	26.7066	25.1976	2.47561e-42	-1.54096	down
WBGene00003517	nac-1	1038	931	1027	3005	3165	3431	14.9316	11.7349	12.2965	37.7183	37.3162	41.2227	2.669e-42	1.31991	up
WBGene00007226	C01G6.4	599	701	732	1951	2109	2082	16.7675	17.2092	17.069	47.6954	48.4203	48.696	2.68879e-42	1.2447	up
WBGene00016458	C35E7.6	614	716	642	2244	2351	2028	8.251	8.4366	7.18568	26.3545	25.9325	22.7953	3.56484e-42	1.38939	up
WBGene00022178	cest-25	667	757	798	2253	2410	2083	10.7383	10.6903	10.7018	31.6943	31.8439	28.0362	3.5838e-42	1.24997	up
WBGene00015425	C04E6.11	2005	2072	2102	766	1089	921	17.4182	15.7717	15.2033	5.80227	7.75061	6.6795	4.41611e-42	-1.49677	down
WBGene00009515	clec-170	614	594	655	144	169	101	10.4331	8.8536	9.27716	2.12739	2.34297	1.42374	5.42581e-42	-2.47104	down
WBGene00000656	col-80	1433	1353	1413	3771	4363	4481	38.3252	31.7143	31.4681	88.0226	95.6474	100.106	5.61683e-42	1.22729	up
WBGene00006700	uba-2	1507	1690	2014	702	859	881	16.7703	16.4818	18.6661	6.81595	7.8307	8.18296	5.84454e-42	-1.42627	down
WBGene00013633	Y105C5A.8	152	124	84	1016	1071	952	4.98427	3.54318	2.27539	29.473	29.1483	26.3962	6.27943e-42	2.64552	up
WBGene00013156	Y53F4B.9	1486	1760	1769	914	839	858	11.2599	11.6856	11.1638	6.04221	5.2108	5.42612	6.58077e-42	-1.279	down
WBGene00022173	set-27	1599	1848	1918	989	1050	1016	19.5391	19.7841	19.5234	10.5462	10.5148	10.3673	6.62543e-42	-1.15266	down
WBGene00019284	K01A2.10	303	392	401	1359	1481	1326	9.50557	10.7868	10.4875	37.375	38.3168	34.9197	7.92537e-42	1.57094	up
WBGene00009028	F21H7.2	0	0	0	341	332	351	0	0	0	4.51266	4.13658	4.44726	9.13546e-42	6.8248	up
WBGene00000698	col-124	11	16	21	321	351	406	0.265219	0.334877	0.412504	7.58639	7.92356	8.38297	9.86814e-42	3.92402	up
WBGene00015486	popl-1	1606	1687	2006	908	821	933	18.5432	17.0708	19.2975	9.14775	7.76621	8.99966	1.03405e-41	-1.32813	down
WBGene00019599	acds-10	924	976	1164	2781	3009	3297	8.45583	7.77523	8.78763	22.073	22.637	25.2222	1.33571e-41	1.21858	up
WBGene00017060	D2063.1	45	47	49	448	549	454	1.15819	1.04011	1.04299	10.0637	11.5839	9.76791	1.43336e-41	2.92622	up
WBGene00022797	best-24	1092	1090	1122	2976	3128	3160	14.1815	12.4116	12.1411	33.7361	33.3106	34.2844	1.64773e-41	1.13181	up
WBGene00004224	ptr-10	1242	1518	2070	631	576	486	11.7132	12.7112	16.3787	5.25172	4.50091	3.88014	2.00067e-41	-1.82373	down
WBGene00018052	F35F10.1	373	417	336	1552	1545	1567	11.567	11.3137	8.674	42.0082	39.2783	40.5842	2.45339e-41	1.68121	up
WBGene00020846	T27A10.6	2151	2829	3692	1315	1249	1268	20.8089	24.1474	29.9788	11.1784	9.91141	10.2466	2.66545e-41	-1.49732	down
WBGene00012186	mlt-11	26969	36491	47151	9514	9357	10178	87.3295	103.077	124.851	27.1666	24.7096	27.8345	2.896e-41	-2.22059	down
WBGene00019103	F59D6.1	59	71	58	501	556	619	3.05411	3.26685	2.52047	23.1658	24.1551	27.3956	3.1925e-41	2.73507	up
WBGene00022852	ZK1127.5	1560	1677	1712	805	795	908	35.0629	33.0313	32.0544	15.7922	14.6504	17.0403	3.53835e-41	-1.32074	down
WBGene00000702	col-128	1385	1829	2113	783	739	590	27.8993	32.2905	35.4602	13.7625	12.1947	9.92119	3.64574e-41	-1.65485	down
WBGene00018682	aagr-4	3296	3672	4575	2092	2402	1920	32.2103	31.4432	37.2346	17.8386	19.2378	15.6701	3.74915e-41	-1.18322	down
WBGene00003066	lpl-1	2342	2740	2951	1712	1663	1683	69.9083	71.6749	73.3685	44.5778	40.6869	41.9584	4.1073e-41	-1.00668	down
WBGene00012984	Y48B6A.13	973	1101	1233	459	499	385	21.828	21.6554	23.0296	8.98831	9.16632	7.20369	4.23457e-41	-1.62954	down
WBGene00020498	T14B4.1	2462	2779	2802	1436	1757	1540	18.1596	17.9655	17.2135	9.24471	10.6247	9.48819	4.69023e-41	-1.10903	down
WBGene00011830	cyp-29A2	707	729	818	2191	2375	2119	11.3884	10.2906	10.9788	30.8155	31.3831	28.5305	5.12889e-41	1.21515	up
WBGene00012531	Y32F6B.1	1605	1663	1962	5768	5438	4459	17.1103	15.5367	17.4131	53.6546	47.5127	39.6951	5.82007e-41	1.23199	up
WBGene00017356	F10E9.4	1757	1720	1782	894	950	844	52.4336	44.9867	44.2945	23.2693	23.2355	21.0375	7.37755e-41	-1.31297	down
WBGene00017045	atg-13	793	746	1060	3142	2968	2733	14.6786	12.0992	16.347	50.8338	45.1189	42.3272	1.04354e-40	1.41567	up
WBGene00050904	Y70C5A.3	359	491	575	2050	1919	1713	4.54496	5.44765	6.07406	22.6855	19.9475	18.1415	1.13248e-40	1.64544	up
WBGene00004727	sax-1	1088	1117	1111	2993	3448	3053	17.0504	15.3378	14.5021	40.98	44.34	39.9952	1.20345e-40	1.16023	up
WBGene00000176	aqp-8	893	973	1080	2553	2722	2836	22.691	22.2457	24.0688	56.2725	56.7687	59.0338	1.39239e-40	1.11135	up
WBGene00004249	pvf-1	466	421	472	1662	1796	1560	11.89	9.42477	10.0365	37.0765	37.6312	33.3134	1.61983e-40	1.52046	up
WBGene00011727	T12A7.6	203	191	171	1124	1176	909	4.15873	3.3432	2.96947	20.3022	20.0166	15.7231	1.95274e-40	2.11596	up
WBGene00008575	scl-24	106	77	112	655	723	825	4.60422	2.93034	4.05034	24.8512	25.7558	29.9609	2.02541e-40	2.49553	up
WBGene00011850	T20B3.1	417	323	410	1543	1644	1764	5.8556	3.97697	4.79036	18.9248	18.9337	20.7097	2.06956e-40	1.73471	up
WBGene00007195	thoc-7	1398	1340	1519	614	642	719	54.4033	45.3193	49.1787	20.4447	20.4016	23.4198	2.19309e-40	-1.44693	down
WBGene00019800	mtss-1	2384	3221	2704	1134	1319	1459	107.714	127.544	101.748	44.7015	48.8415	55.0612	2.5915e-40	-1.42361	down
WBGene00018101	math-27	304	469	389	1730	1582	1598	3.42196	4.57295	3.62234	17.1974	14.3704	15.0745	2.79483e-40	1.7205	up
WBGene00019279	K01A2.4	2029	1918	2267	977	1191	1079	42.8084	35.4645	39.8269	17.9772	20.5921	19.0033	2.99387e-40	-1.27933	down
WBGene00021133	tomm-22	3432	3161	3426	1933	2019	1818	205.785	166.496	169.278	102.831	98.1068	90.0098	3.02671e-40	-1.14439	down
WBGene00021977	Y58A7A.3	76	109	87	687	606	685	0.743233	0.932294	0.715234	5.94066	4.91876	5.6693	4.04753e-40	2.46512	up
WBGene00007394	C06H5.6	1504	1760	1857	929	1001	974	23.6353	24.2196	24.2974	12.7261	12.8819	12.7881	4.81039e-40	-1.15738	down
WBGene00021757	taco-1	1993	2171	2136	1131	984	1156	50.3103	48.0122	44.8896	24.9079	20.3503	24.3572	5.06811e-40	-1.28594	down
WBGene00001815	hmt-1	1952	1923	2172	983	935	1134	21.0038	18.1257	19.4632	9.22937	8.24316	10.1849	6.95921e-40	-1.32586	down
WBGene00001028	dnj-10	3184	3413	3368	1958	2236	1876	54.5257	51.2324	48.1009	29.0843	31.5656	26.7596	7.95628e-40	-1.06219	down
WBGene00013594	Y87G2A.2	184	202	207	877	912	1002	5.38824	5.18445	5.03914	22.4101	21.8746	24.4902	8.42795e-40	1.86511	up
WBGene00000534	cpi-2	1331	1709	1992	4438	4633	4610	60.8901	65.8271	75.3816	170.846	166.912	176.45	9.16146e-40	1.10124	up
Caenorhabditis_elegans_newGene_2079	-	328	360	385	1415	1509	1222	2.31914	2.56018	2.31267	9.14055	9.29947	7.77939	1.40679e-39	1.58932	up
WBGene00007536	daf-36	859	1035	1029	290	418	350	16.6768	17.6069	16.6387	4.90118	6.65072	5.66376	1.44551e-39	-1.79341	down
WBGene00020700	T22F3.11	96	63	74	692	661	621	1.57233	0.906175	1.01241	9.96931	8.9446	8.55371	1.57065e-39	2.65583	up
WBGene00020037	mrps-6	2547	2710	2890	1758	1740	1570	94.1185	87.7445	88.929	56.669	52.6881	48.4506	1.98601e-39	-1.02832	down
WBGene00011076	scav-5	1154	1432	1385	647	633	665	18.3159	19.9091	18.2969	8.94893	8.22636	8.81128	2.01287e-39	-1.36499	down
WBGene00017319	mrps-9	3147	3267	3322	1749	2142	1971	67.8431	61.7237	59.6506	32.8952	37.8456	35.4846	2.71194e-39	-1.07927	down
WBGene00013260	rsr-2	2038	2357	2348	1338	1409	1419	42.8317	43.4093	41.103	24.5464	24.2798	24.9154	3.46178e-39	-1.03732	down
WBGene00007223	C01F6.9	1771	1890	1857	868	1010	1028	131.218	122.71	114.579	56.1008	61.3066	63.5844	3.53676e-39	-1.26889	down
WBGene00010790	sodh-1	13210	10937	12596	52415	58909	53710	280.913	203.809	223.077	972.631	1026.81	953.906	3.7995e-39	1.78966	up
WBGene00020465	T12E12.6	482	757	854	141	153	188	6.09677	8.39912	8.99939	1.5546	1.58542	1.98245	4.95954e-39	-2.3983	down
WBGene00022181	pho-9	43	60	73	516	613	474	0.911864	1.12341	1.29202	9.6217	10.7429	8.46161	5.44946e-39	2.76937	up
WBGene00013906	ugt-5	251	289	365	1243	1352	1144	4.19597	4.27006	5.0867	18.1696	18.5729	16.0578	7.13085e-39	1.68923	up
WBGene00013207	zipt-2.3	254	339	358	30	51	38	6.3492	7.43221	7.46495	0.651758	1.0356	0.792476	8.65254e-39	-3.21318	down
WBGene00018351	F42G2.2	535	553	600	1932	2022	1673	7.72084	7.05335	7.01416	24.4635	24.0936	19.6266	9.63438e-39	1.37953	up
WBGene00009215	thn-2	167	101	142	901	960	919	5.7502	3.04096	4.07457	28.399	27.7148	28.0455	1.08107e-38	2.35452	up
WBGene00010231	F58B3.4	2953	3000	3427	1934	1589	1587	43.7376	38.9297	42.2419	24.9851	19.2769	19.6099	1.16615e-38	-1.21479	down
WBGene00008334	sdz-8	437	413	434	1544	1576	1876	14.543	12.043	12.0102	44.8371	42.981	52.132	1.30107e-38	1.59423	up
WBGene00012216	W02D9.10	1226	1233	1569	3915	3732	3507	43.1744	38.0554	46.0294	120.327	107.748	103.171	1.50923e-38	1.12168	up
WBGene00000780	cpn-4	1953	2422	2283	1295	1150	1091	94.8537	103.101	92.3585	54.8798	45.7792	44.2668	2.01755e-38	-1.25038	down
WBGene00019203	ttr-47	933	980	883	2704	3300	2882	47.3095	43.556	37.2847	119.665	137.154	122.037	2.5182e-38	1.30512	up
WBGene00003409	mrp-3	436	507	513	1653	1731	1487	2.65289	2.70392	2.59748	8.78149	8.63606	7.55729	2.56521e-38	1.3865	up
WBGene00010042	bcs-1	1685	2060	2136	1036	925	1107	33.474	35.9468	35.4235	17.7665	15.096	18.4611	2.67355e-38	-1.27261	down
WBGene00000202	exos-4.2	1511	1545	1782	841	754	869	47.1622	42.2769	46.3431	22.9172	19.2968	22.6609	2.71299e-38	-1.3101	down
WBGene00021813	Y53G8AR.6	1745	1944	2009	1034	1129	1166	37.4195	36.5217	35.8653	19.3481	19.8303	20.879	2.75808e-38	-1.11726	down
WBGene00010230	rpac-19	1129	1137	1309	575	556	477	56.5026	50.0209	54.6023	25.2066	22.9301	20.0634	3.21542e-38	-1.4874	down
WBGene00019146	H02F09.3	413	356	454	60	51	84	2.99641	2.25992	2.74017	0.376895	0.297774	0.505532	3.23543e-38	-2.90312	down
WBGene00000623	col-46	862	1104	1411	328	436	293	21.5139	24.1525	29.3323	7.14193	8.92128	6.10875	3.49944e-38	-1.98313	down
WBGene00019421	K05F6.10	244	240	211	1004	1128	1155	4.97103	4.28725	3.58421	17.8677	18.8579	19.6785	4.08287e-38	1.86225	up
WBGene00001782	gst-34	36	24	29	415	376	419	1.51892	0.871217	1.00849	15.3059	13.0096	14.7865	4.1009e-38	3.27317	up
WBGene00007599	C15A11.7	374	477	537	1558	1629	1846	6.23087	6.97277	7.46059	22.6826	22.2875	25.7278	4.12933e-38	1.507	up
WBGene00018346	F42C5.4	162	147	160	929	934	744	2.04852	1.62833	1.68709	10.2931	9.71913	7.78276	5.76482e-38	2.08906	up
WBGene00011097	nhr-206	64	81	81	682	617	496	1.22855	1.36398	1.30972	11.7546	10.0657	8.0475	5.88602e-38	2.58142	up
WBGene00012686	Y39B6A.27	193	166	188	857	903	949	3.68029	2.77644	2.9831	14.2777	14.1305	15.1267	1.07933e-37	1.92926	up
WBGene00000796	crn-3	3351	3603	3497	2290	2284	2069	34.1576	32.1852	29.6829	20.3711	19.0769	17.615	1.12959e-37	-1.00037	down
WBGene00006889	pfd-3	2646	2877	3038	1671	1988	1663	84.5307	80.5385	80.8184	46.5777	52.0357	44.3547	1.23571e-37	-1.03023	down
WBGene00020717	mrpl-4	1899	2337	2426	1371	1374	1292	52.2004	56.2791	55.5242	32.8696	30.9549	29.6503	1.29579e-37	-1.06074	down
WBGene00008934	F18C12.3	1753	1794	2019	1110	1090	1056	28.3808	25.4529	27.223	15.6777	14.4626	14.2845	1.46246e-37	-1.11513	down
WBGene00013129	Y52B11A.10	2589	2707	3126	1597	1911	1747	28.0824	25.7267	28.2385	15.1125	16.9929	15.8204	1.49235e-37	-1.0231	down
WBGene00010001	F53F8.4	2585	2270	2344	6578	7054	7886	75.0661	57.7505	56.6764	166.689	167.921	191.259	1.87242e-37	1.21614	up
WBGene00015602	fbxa-158	0	4	0	321	326	215	0	0.073413	0	6.585	6.27823	4.22768	1.88222e-37	5.9013	up
WBGene00015172	B0410.3	705	672	750	2400	2683	2061	23.8809	19.9386	21.1483	70.9823	74.5403	58.3315	2.02693e-37	1.38678	up
WBGene00010925	mfsd-11	955	1084	1209	463	552	453	18.9056	18.808	19.9387	8.00059	8.94922	7.48979	2.45226e-37	-1.47837	down
WBGene00007358	lact-6	14	22	22	376	530	285	0.18068	0.252891	0.242592	4.45049	5.894	3.22137	3.66945e-37	3.78591	up
WBGene00000941	ddp-1	2076	2405	2243	1072	1110	1328	142.783	144.94	128.506	64.3207	62.5741	76.2767	3.90327e-37	-1.27831	down
WBGene00011524	plpr-1	1014	1352	1295	475	463	578	18.2736	21.3497	19.4266	7.46532	6.83355	8.69154	4.69485e-37	-1.59789	down
WBGene00015268	BE0003N10.3	822	992	1229	318	382	420	9.34266	9.88451	11.6433	3.1509	3.55969	3.98834	5.43003e-37	-1.75902	down
WBGene00009621	fipr-21	3298	4703	4732	2259	2214	2558	207.83	259.749	248.329	124.228	114.349	134.617	5.73663e-37	-1.18733	down
WBGene00000133	amt-1	34	40	45	439	474	364	0.531487	0.555214	0.597586	6.15803	6.24807	4.88165	6.44864e-37	2.97433	up
WBGene00000535	cpi-1	297	304	373	1428	1436	1138	14.8034	13.2985	15.5059	62.2592	58.8205	47.4822	6.62502e-37	1.67657	up
WBGene00044696	F52E1.14	1778	1971	1963	1107	1154	1171	71.2031	69.1694	65.4399	38.6838	37.8765	39.1554	1.03925e-36	-1.07833	down
WBGene00021020	W04B5.3	1849	2080	2245	1095	1301	1261	32.1759	32.1898	32.721	16.2318	19.418	17.8775	1.04465e-36	-1.09638	down
WBGene00004914	snr-1	2312	2776	3343	1585	1761	1532	95.0501	100.021	114.466	56.8356	59.34	52.6052	1.24401e-36	-1.12297	down
WBGene00018696	pho-6	327	349	303	1285	1340	1632	8.11795	7.58978	6.25163	27.8343	27.2673	33.854	1.30425e-36	1.74734	up
WBGene00001811	haf-1	214	248	348	1107	1240	1202	2.81154	2.84687	3.80333	12.6877	13.3533	13.1883	1.44466e-36	1.77363	up
WBGene00018427	F44E7.5	419	590	559	144	123	141	7.17808	8.87342	7.98991	2.14448	1.73233	2.02028	1.56991e-36	-2.23782	down
WBGene00002060	ife-2	3777	4364	4677	2350	2283	2882	119.013	120.506	122.732	64.6048	58.9567	75.8335	1.63263e-36	-1.10788	down
WBGene00019715	M01G5.1	1525	1679	1682	944	941	920	12.2833	11.8534	11.284	6.63081	6.2122	6.18606	1.8274e-36	-1.14291	down
Caenorhabditis_elegans_newGene_1675	-	91	101	124	605	675	604	1.02924	0.634859	0.970898	4.91547	5.06607	4.15053	1.88487e-36	2.19187	up
WBGene00014233	ZK1128.7	403	455	509	1532	1749	1413	12.9922	12.2616	13.742	41.7002	42.1646	34.5507	2.51874e-36	1.42384	up
WBGene00003059	lpd-2	1106	1220	1296	588	662	553	28.8804	27.9224	28.1819	13.3953	14.166	12.0603	2.64354e-36	-1.34418	down
Caenorhabditis_elegans_newGene_1370	-	407	396	489	1363	1592	1508	5.11165	3.55563	6.37523	12.5956	14.0892	13.9758	4.24984e-36	1.43043	up
WBGene00001309	emr-1	1446	2104	2009	810	946	931	61.1638	77.9911	70.7729	29.8768	32.8012	32.8729	4.36826e-36	-1.37864	down
WBGene00017336	ugt-41	150	140	205	790	857	912	2.31699	1.8945	2.63538	10.6791	10.8849	11.7949	4.62415e-36	1.99691	up
WBGene00021061	W06E11.1	1865	1879	2089	1064	1193	1187	33.4594	29.5423	31.2113	16.6493	17.5351	17.7741	4.64255e-36	-1.1037	down
WBGene00011450	ttr-22	187	184	176	962	957	801	10.6006	9.16161	8.30177	47.6878	44.5809	38.0045	4.81553e-36	1.93316	up
WBGene00003664	nhr-74	1591	1955	2134	942	1154	952	41.1271	44.2848	45.9374	21.2312	24.4553	20.5467	4.84221e-36	-1.23338	down
WBGene00004918	snr-5	1102	1403	1414	572	696	645	87.217	97.3466	93.2391	39.4649	45.1254	42.6047	5.62388e-36	-1.3684	down
WBGene00017133	EEED8.2	43	51	65	507	448	444	1.25286	1.29587	1.58999	13.0725	10.856	10.9399	6.04417e-36	2.71735	up
WBGene00019652	cest-34	131	133	162	809	761	682	2.11406	1.88051	2.17604	11.4095	10.0821	9.20609	6.86638e-36	2.02547	up
WBGene00001702	grd-13	1591	1681	1612	3887	4667	4509	72.8134	67.4198	61.4341	155.277	175.126	172.407	7.26053e-36	1.06222	up
WBGene00016892	pgph-3	393	362	592	4374	4597	6312	8.71636	7.03866	10.9416	84.7289	83.6318	117.011	7.28008e-36	3.05138	up
WBGene00011559	umps-1	2395	3107	3105	1731	1681	1839	39.0569	44.1403	42.0311	24.6185	22.4615	24.9638	7.83693e-36	-1.0495	down
WBGene00011166	chil-22	212	239	218	1064	1020	897	3.98264	3.92856	3.40047	17.4342	15.6975	14.0666	8.14947e-36	1.78437	up
WBGene00012970	Y48A6B.9	103	117	111	618	637	782	2.30021	2.28174	2.03929	12.0213	11.6265	14.5633	1.06536e-35	2.22993	up
WBGene00021348	moag-4	2553	3073	2847	1823	1745	1635	153.002	161.559	142.211	94.5007	85.5318	81.8287	1.08186e-35	-1.04596	down
WBGene00021828	Y54E10A.6	2071	1775	2148	991	1093	1036	28.4914	21.3963	24.6118	11.8878	12.3219	11.8955	1.21962e-35	-1.28635	down
WBGene00018952	F56C9.8	1003	882	1124	3083	3152	2764	22.6583	17.452	21.1452	60.778	58.37	52.1485	1.35118e-35	1.22455	up
WBGene00007764	C27B7.7	440	406	529	1769	2032	1494	2.70139	2.18325	2.70524	9.48871	10.241	7.66926	2.18828e-35	1.58207	up
WBGene00013477	Y69E1A.5	471	446	476	2019	1893	1503	20.3492	16.9045	17.054	76.2416	67.0156	54.1769	2.38411e-35	1.59164	up
WBGene00010274	F58G6.3	958	1066	975	443	344	359	63.3839	61.7797	53.7206	25.5355	18.6417	19.798	2.56211e-35	-1.71654	down
WBGene00017484	F15E6.3	21	23	33	426	564	293	1.09229	1.05436	1.45572	20.2112	25.1236	13.2805	2.82516e-35	3.5235	up
WBGene00017127	E04F6.8	156	109	94	830	1036	834	9.4748	5.80333	4.76412	44.2037	51.8429	42.5329	2.94857e-35	2.47835	up
WBGene00018431	F44E7.9	1637	1593	1755	915	787	875	87.9821	75.0317	78.5355	42.8955	34.6501	39.2734	3.09131e-35	-1.29173	down
WBGene00020031	suco-1	2264	2151	2314	6381	6777	5340	21.8637	18.1987	18.6033	53.7693	53.6431	43.0669	3.31794e-35	1.10098	up
WBGene00007130	B0272.4	213	292	304	1016	1204	1076	6.09008	7.33241	7.25526	25.4282	28.2966	25.7682	4.37342e-35	1.66695	up
WBGene00007923	C34C12.4	536	582	568	1648	2000	1736	23.9595	22.8524	20.6345	61.0727	73.1417	64.692	6.20948e-35	1.31523	up
WBGene00013901	ugt-16	1620	1567	1631	657	875	635	25.2104	21.3731	21.1474	8.91638	11.1628	8.25562	6.78667e-35	-1.49467	down
WBGene00013643	Y105C5A.24	593	539	655	1766	1914	1944	9.56881	7.61979	8.80229	24.8706	25.3108	26.1948	8.29981e-35	1.29638	up
WBGene00012641	epg-6	831	721	981	2559	2741	2486	18.4744	14.3943	18.9034	49.7452	50.4436	45.8188	8.67387e-35	1.26473	up
WBGene00009803	F47B8.2	472	371	490	1608	1763	1612	18.5183	12.7523	16.0185	55.1548	56.8076	52.9185	8.73004e-35	1.53559	up
WBGene00013485	Y69H2.10	82	148	141	739	851	702	1.33961	2.14205	1.85638	10.334	11.6859	9.40341	1.01185e-34	2.24432	up
WBGene00006986	zip-1	897	1056	990	2812	2709	2542	14.1826	15.2444	12.3691	36.5985	33.4746	31.6864	1.02409e-34	1.10159	up
WBGene00015250	B0546.3	884	1111	1030	2717	2894	2586	17.9647	19.7929	17.6683	48.2601	48.8583	43.8016	1.69554e-34	1.0869	up
WBGene00015266	BE0003N10.1	1487	1380	1597	779	796	799	16.8865	13.7362	15.1001	7.71182	7.40443	7.57634	1.8688e-34	-1.25307	down
WBGene00001623	glt-5	210	235	286	954	975	996	3.25498	3.19251	3.70015	12.9354	12.4298	12.9259	1.93015e-34	1.64113	up
WBGene00021354	fpn-1.1	968	1179	1259	504	612	518	15.7433	16.7784	17.0894	7.15048	8.17943	7.01616	2.57284e-34	-1.39228	down
WBGene00019489	K07E1.1	932	910	790	2761	2943	2765	33.4373	28.3392	23.6859	86.0212	86.0076	83.2693	2.60387e-34	1.31887	up
WBGene00012992	mrpl-20	1275	1554	1550	761	739	837	53.9967	57.6779	54.6613	28.1173	25.6445	29.5939	2.84972e-34	-1.24176	down
WBGene00009877	F49C12.7	212	274	308	1186	1032	1058	4.01819	4.40438	4.80328	19.5826	15.9913	16.5479	3.30622e-34	1.68736	up
WBGene00013382	gcl-1	567	575	627	1859	1734	1748	8.2645	7.34311	7.61801	23.6763	20.7419	21.3071	3.34962e-34	1.23925	up
WBGene00003710	nhr-120	715	799	896	2206	2327	2060	11.8079	11.565	12.319	31.7995	31.5062	28.4211	3.87817e-34	1.10223	up
WBGene00020296	rrp-8	2148	2421	2426	1479	1239	1236	49.4489	48.8394	46.5076	29.6995	23.3744	23.7518	3.89583e-34	-1.1622	down
WBGene00020326	math-38	277	294	284	1081	1207	1023	5.71705	5.31783	4.88332	19.4945	20.4517	17.6592	4.68528e-34	1.58594	up
WBGene00011495	T05F1.11	656	593	743	2116	2193	1910	5.77222	4.57453	5.4494	16.2592	15.8303	14.0472	5.0634e-34	1.28552	up
WBGene00019148	H03E18.1	2649	3719	4566	1688	1883	1938	19.8522	24.4234	28.5016	11.0386	11.5654	12.1311	6.92316e-34	-1.31101	down
WBGene00008647	F10C2.7	22	18	28	441	308	323	0.435185	0.307095	0.470149	7.75909	5.08201	5.42824	7.09212e-34	3.44966	up
WBGene00007201	exos-4.1	1303	1679	1746	799	863	666	39.7339	44.8814	44.3576	21.2645	21.5812	16.9671	8.04938e-34	-1.35351	down
WBGene00009820	F47B10.9	38	63	84	554	623	465	1.07083	1.55772	1.97951	13.8034	14.5861	11.0832	8.31203e-34	2.73041	up
WBGene00018874	tag-234	146	216	244	930	1041	883	8.78129	11.3003	12.0834	46.9423	49.5879	43.3295	8.56076e-34	1.87198	up
WBGene00022307	nadk-1	1254	1328	1547	3322	4040	3391	27.2221	25.2615	27.9601	62.9418	71.9041	61.4783	8.63227e-34	1.03016	up
WBGene00000977	dhs-14	59	38	42	464	441	475	1.70268	0.954427	1.00804	11.7397	10.4676	11.5035	9.01886e-34	2.85085	up
WBGene00013151	nsun-5	1091	1139	1016	457	388	473	21.2597	19.207	16.485	7.7298	6.16401	7.67361	1.01482e-33	-1.6348	down
WBGene00015245	B0524.6	1454	1563	1981	904	905	936	40.3499	38.0124	45.8056	21.8811	20.5885	21.6958	1.13434e-33	-1.19777	down
WBGene00017428	F13D11.3	327	234	339	1467	1470	1212	14.183	8.87927	12.2432	55.587	52.2937	43.945	1.14191e-33	1.82704	up
WBGene00019368	txt-4	1305	1355	1543	684	530	690	33.8877	31.287	33.5196	15.2267	11.0941	14.698	1.30693e-33	-1.47245	down
WBGene00050939	C05G5.7	847	1079	1224	292	415	437	28.1052	31.3855	33.8333	8.43693	11.2839	12.1112	1.50502e-33	-1.77761	down
WBGene00021430	Y38F2AR.12	1408	1212	1516	3606	3884	4044	11.0009	7.96023	9.76785	22.9976	23.3914	24.9432	1.53815e-33	1.12326	up
WBGene00012977	Y48A6C.4	1917	2120	1975	1143	1267	1162	32.382	31.3887	27.7785	16.8468	17.5443	16.3851	1.62921e-33	-1.09692	down
WBGene00018781	F54A3.2	1511	1570	1812	988	939	902	16.0074	14.5732	15.989	9.12661	8.14826	7.97708	1.85729e-33	-1.12938	down
WBGene00020237	phat-4	1213	1656	2091	730	616	704	37.7391	45.1562	54.1912	19.8058	15.7029	18.285	1.88408e-33	-1.58713	down
WBGene00010812	mrpl-35	1538	1504	1770	754	926	895	74.3133	63.6902	71.2524	31.7802	36.6561	36.1045	2.41292e-33	-1.2427	down
WBGene00020499	mrps-18.C	1314	1408	1564	563	734	763	74.0356	69.5284	73.4186	27.6866	33.8786	35.9241	2.47369e-33	-1.39286	down
WBGene00009797	F46G10.2	904	1187	1278	2842	3109	2958	10.3727	11.9292	12.2864	28.6315	29.4716	28.6129	2.53298e-33	1.05818	up
WBGene00271795	Y46C8AM.1	55	56	41	419	468	595	2.0423	1.88944	1.30186	13.9239	14.5388	18.8807	2.56856e-33	2.82845	up
WBGene00022851	ZK1127.4	2036	2213	2171	1216	1162	1357	48.6986	46.383	43.2272	25.374	22.7777	27.0968	2.59378e-33	-1.12408	down
WBGene00010115	aakb-1	822	1053	980	2710	2626	2484	19.5585	21.9655	19.4237	56.3199	51.2469	49.4011	2.86646e-33	1.10371	up
WBGene00012545	Y37D8A.3	1570	1738	2290	937	1047	1002	40.8854	39.6554	49.6576	21.2935	22.3515	21.782	2.90436e-33	-1.23736	down
WBGene00007240	C01G10.15	1171	1425	1302	527	668	659	87.6958	93.5471	81.2199	34.4456	40.9726	41.2165	3.27407e-33	-1.40921	down
WBGene00021703	cpt-3	6	0	5	288	248	205	0.065586	0	0.042535	3.18919	2.57624	2.17168	3.59976e-33	4.96627	up
WBGene00016456	C35E7.4	1066	1063	1039	2788	3166	2807	13.6996	11.969	11.1166	31.2751	33.3554	30.131	3.64492e-33	1.10813	up
WBGene00018731	F53A9.8	725	925	991	2298	3093	3029	59.4252	66.4547	67.6263	164.384	207.822	207.375	4.29993e-33	1.32063	up
WBGene00010251	sta-2	579	495	511	1970	1882	1767	8.85294	6.6391	6.5008	26.303	23.6082	22.5826	4.48871e-33	1.45664	up
WBGene00000765	coq-5	1951	2305	2341	1359	1230	1406	56.014	57.9955	55.9654	34.0405	28.9437	33.711	6.00639e-33	-1.06214	down
WBGene00009710	F44G3.10	327	397	516	96	101	94	18.2328	19.4543	23.9936	4.65646	4.61713	4.38817	6.28418e-33	-2.36835	down
WBGene00008211	C49F5.7	115	105	104	580	636	667	7.85136	6.23268	5.86327	34.5042	35.5882	38.02	7.1646e-33	2.14249	up
WBGene00020256	T05C3.6	711	700	854	193	264	294	12.2186	10.3075	11.9127	2.8125	3.64582	4.11066	7.18995e-33	-1.90983	down
WBGene00002069	ikb-1	449	538	538	1868	2264	1535	6.20381	6.50772	6.18863	22.5255	25.6398	17.7086	7.29456e-33	1.53113	up
WBGene00011673	cyp-13A6	26	31	37	377	341	334	0.424408	0.449919	0.515489	5.51323	4.68409	4.67977	7.41843e-33	3.01783	up
WBGene00013647	Y105C5B.5	273	309	228	1114	1204	1316	15.4424	15.3425	10.7261	55.1232	55.9374	62.3137	7.96385e-33	1.78539	up
WBGene00007312	C04H5.1	1468	1594	1856	864	757	939	64.9536	61.8118	68.373	33.343	27.4269	34.6879	8.17688e-33	-1.27477	down
WBGene00010628	ceeh-2	102	177	206	820	1045	899	2.01373	3.08522	3.40685	14.234	17.04	14.9302	8.97213e-33	2.13654	up
WBGene00007340	C05D12.2	353	309	339	1151	1353	1297	3.11625	2.39089	2.49535	8.87898	9.80149	9.56969	1.0475e-32	1.55455	up
WBGene00012070	T26H5.8	24	49	37	421	469	349	0.484803	0.898604	0.64789	7.87488	8.24723	6.24998	1.09674e-32	3.02558	up
WBGene00009132	F25H8.2	1161	1352	1447	741	734	756	22.9385	23.4063	23.8131	12.7696	11.8811	12.4806	1.10869e-32	-1.1644	down
WBGene00022493	mrpl-45	2375	2662	2988	1745	1444	1607	33.5188	32.9252	35.1197	21.4828	16.7019	18.9353	1.16444e-32	-1.07869	down
WBGene00022474	zig-9	703	689	772	1915	2082	2153	15.5937	13.3873	14.2576	37.052	37.8456	39.878	1.41185e-32	1.15155	up
WBGene00010039	F54C8.6	339	414	394	1495	1328	1251	10.1666	11.1535	9.94503	39.0309	32.8326	31.3768	1.57475e-32	1.47031	up
WBGene00018260	cyp-33C7	256	176	223	1011	1134	1068	4.68494	2.81475	3.39869	16.1525	17.0165	16.3285	1.66524e-32	1.90561	up
WBGene00017379	F11C7.7	190	224	250	810	1072	1083	11.2109	11.5597	12.3123	41.7909	51.9448	53.4736	2.05592e-32	1.78964	up
WBGene00016111	C25H3.1	0	4	6	201	249	237	0	0.090905	0.115439	4.58664	5.34126	5.18124	2.06804e-32	4.97489	up
Caenorhabditis_elegans_newGene_1375	-	260	303	262	47	44	39	3.53472	3.74801	2.99254	0.59802	0.715189	0.437497	2.15227e-32	-2.90367	down
WBGene00013673	Y105E8A.13	582	789	818	220	287	278	16.9488	20.1984	19.9185	5.5985	6.82379	6.77794	2.30929e-32	-1.79484	down
WBGene00010019	F54B8.4	24	31	29	349	396	289	1.73858	2.02233	1.78766	21.7479	23.1324	17.2797	3.133e-32	3.13042	up
WBGene00011817	T16H12.9	260	288	248	1041	1028	1178	7.56564	7.34971	6.00138	26.4526	24.5412	28.6561	3.13385e-32	1.65733	up
Caenorhabditis_elegans_newGene_74	-	1205	1227	1215	628	637	548	15.3948	13.8561	13.0237	6.99663	6.75306	5.89877	3.14384e-32	-1.34966	down
WBGene00022386	Y95B8A.6	331	434	488	1342	1403	1467	6.48522	7.09763	8.69186	22.1489	23.5525	24.1986	4.40394e-32	1.39877	up
WBGene00016655	acbp-1	2683	3566	3175	1655	2074	1834	188.481	219.319	183.869	96.387	117.615	106.252	5.14719e-32	-1.10133	down
WBGene00003154	mcm-2	2661	2730	3360	1538	1826	1917	26.1639	23.524	27.5204	13.1959	14.7141	15.7341	5.14719e-32	-1.06785	down
WBGene00013217	ddl-3	2265	2241	2446	1335	1413	1545	47.8474	41.4932	43.0288	24.6012	24.4493	27.2437	6.15721e-32	-1.04009	down
WBGene00003632	nhr-42	556	597	587	1661	1747	1649	13.8264	13.0272	12.1588	36.0963	35.6602	34.2969	6.92312e-32	1.18252	up
WBGene00016234	C29G2.6	174	204	255	848	1079	874	6.92475	7.08385	8.43301	29.465	35.2096	29.039	7.81789e-32	1.77925	up
WBGene00045401	eol-1	40	21	29	478	724	317	1.0034	0.516209	0.678121	11.8237	16.8578	7.49377	8.39156e-32	3.49849	up
WBGene00015271	C01B4.7	307	295	421	1602	1475	1185	5.95118	5.01861	6.81224	27.5139	23.522	19.2764	9.38236e-32	1.69651	up
WBGene00014206	nit-1	486	414	423	1607	1575	1909	13.1394	9.84286	9.69393	38.2168	34.9614	43.7941	9.58916e-32	1.57074	up
WBGene00015329	C02B10.4	2114	2135	2374	1283	1367	1486	66.6069	58.946	62.2798	35.2796	35.3068	39.086	1.09296e-31	-1.0226	down
WBGene00012364	zmp-4	619	829	850	2141	2261	2064	12.7634	15.5131	14.0701	41.0155	40.7807	36.6372	1.1673e-31	1.14518	up
WBGene00004185	pro-1	1424	1426	1543	866	812	775	23.1178	20.2843	20.8574	12.258	10.8012	10.5053	1.19409e-31	-1.18207	down
WBGene00009554	F39B2.3	327	336	396	1258	1168	1441	8.13509	7.32377	8.2096	27.3614	23.8601	29.9831	1.22063e-31	1.5095	up
WBGene00005228	srh-2	9	12	4	251	310	218	0.186937	0.26732	0.059591	5.0252	5.99882	4.48782	1.33585e-31	4.19556	up
WBGene00010437	cox-11	1226	1270	1483	762	697	654	36.0588	32.7453	36.3569	19.5933	16.8387	18.2188	1.39659e-31	-1.2489	down
WBGene00018353	fbxa-182	53	30	52	603	783	365	0.673218	0.335757	0.556855	6.78508	8.27343	3.92097	1.51768e-31	3.18359	up
WBGene00013532	Y73F8A.27	1266	1454	1426	753	773	826	45.872	46.1623	43.0245	23.8041	22.9581	24.9767	1.85135e-31	-1.15796	down
WBGene00009534	F38B7.3	754	754	781	2049	2351	2048	13.1234	11.495	11.3244	31.1224	33.5535	29.7867	2.06109e-31	1.13606	up
WBGene00004156	pqn-74	2647	4131	4222	2056	1869	1860	49.0173	67.0399	65.1117	33.2422	28.9985	28.7811	2.31356e-31	-1.25091	down
WBGene00003643	nhr-53	70	99	79	538	516	531	1.65907	2.08118	1.56198	11.2626	10.144	10.6473	2.37767e-31	2.27649	up
WBGene00000298	cat-4	742	878	838	2201	2157	2179	23.0502	23.9112	21.6961	59.7036	54.9436	56.5663	2.44326e-31	1.05956	up
WBGene00019525	K08D9.4	44	75	81	661	628	426	1.18546	1.77368	1.83173	16.0273	14.4425	9.97869	2.85136e-31	2.6761	up
WBGene00007228	acs-7	227	429	388	1380	1638	1563	3.70495	6.15126	5.29352	19.7265	21.9966	21.3871	3.00746e-31	1.77397	up
WBGene00016360	C33G8.2	44	48	45	416	397	363	0.875038	0.823075	0.740559	7.22194	6.47156	6.04033	3.8134e-31	2.66365	up
WBGene00008335	C55A6.6	475	542	581	1635	1958	1509	14.209	14.2014	14.487	42.7085	48.0576	37.7255	3.91742e-31	1.31812	up
WBGene00008239	fshr-1	955	914	1076	2499	2583	2514	8.45611	7.09554	7.93681	19.3218	18.7599	18.5966	4.01999e-31	1.01441	up
WBGene00004157	pqn-75	685	884	986	2262	2622	2943	11.8205	13.3748	14.1668	34.09	37.4057	42.454	4.36717e-31	1.26694	up
WBGene00000391	cdd-1	983	1059	1013	496	525	439	30.2343	28.5484	25.9611	13.306	13.2272	11.2836	4.68983e-31	-1.40393	down
WBGene00015449	ugt-63	507	674	656	183	204	239	9.02233	10.5064	9.7264	2.83293	2.97414	3.55266	4.99575e-31	-1.86539	down
WBGene00001157	ech-8	185	297	247	980	1089	1031	3.54472	4.98217	3.94168	16.3938	17.1208	16.5027	5.17708e-31	1.72321	up
WBGene00012491	Y20C6A.1	225	174	229	932	967	887	1.96826	1.31891	1.7068	7.27028	7.12509	6.56051	5.34275e-31	1.77205	up
WBGene00045338	M01B2.13	0	0	0	262	257	143	0	0	0	7.39116	6.81067	3.8652	5.39534e-31	6.14961	up
WBGene00008476	E03H4.8	218	208	285	905	1001	1166	3.88373	3.25718	4.23114	14.1104	14.6596	17.395	5.78174e-31	1.74401	up
WBGene00004933	sod-4	628	567	627	1989	2337	1766	22.0799	17.5875	18.0352	62.1771	68.0246	53.0179	5.85866e-31	1.37541	up
WBGene00020702	T22F7.3	878	1231	1654	398	404	512	7.29074	8.95351	11.4369	2.88321	2.74621	3.54945	8.52638e-31	-1.81719	down
WBGene00002275	lem-2	2061	2031	2076	1198	1321	1279	31.47	27.1722	26.3982	15.9625	16.5263	16.3036	9.96654e-31	-1.04702	down
WBGene00017582	F18G5.6	559	766	873	2347	2362	2059	16.667	20.0156	21.662	61.0502	57.7271	51.2734	1.03708e-30	1.27713	up
WBGene00018403	F44A2.3	529	479	534	1672	1661	2097	7.12796	5.65844	5.99529	19.67	18.3595	23.616	1.04273e-30	1.45122	up
WBGene00008409	mpst-1	1733	1524	1957	975	938	929	44.5766	34.3493	41.9408	21.8942	19.7804	19.9587	1.09538e-30	-1.21533	down
WBGene00011247	mrpl-49	1608	1890	1828	989	905	1099	68.5067	70.6015	64.8787	36.7553	31.5952	39.1101	1.57455e-30	-1.16959	down
WBGene00001773	gst-25	33	40	32	359	334	355	1.3716	1.48169	1.11753	13.4083	11.7167	12.6868	1.82562e-30	2.85604	up
WBGene00007749	ceh-79	220	267	240	946	914	932	3.54831	3.9423	3.34318	13.8692	12.4308	13.1689	2.45385e-30	1.5762	up
WBGene00015104	B0280.9	3267	3576	3304	1700	2090	2221	64.9035	62.2476	54.6503	29.4664	34.0247	36.8373	3.1233e-30	-1.10187	down
WBGene00012750	faah-6	276	265	220	994	1178	1112	4.58784	3.86002	3.04295	14.4421	16.0668	15.4548	3.51862e-30	1.72598	up
WBGene00007336	C05C12.4	1216	1391	1344	3828	3669	3076	33.746	33.8402	31.0656	92.7257	83.5014	71.3215	4.099e-30	1.06694	up
WBGene00015044	cyp-34A9	120	152	122	686	639	676	2.05102	2.26855	1.70393	10.2714	8.99758	9.61504	4.47943e-30	1.96068	up
WBGene00014176	ZK1010.2	1600	2009	1873	1125	1141	1021	34.2256	37.661	33.3689	20.992	19.9956	18.2375	5.01264e-30	-1.07768	down
WBGene00020194	T03G6.1	1455	2334	2836	968	876	931	34.8759	49.0459	56.6286	20.254	17.204	18.6277	5.87922e-30	-1.56251	down
WBGene00013578	scav-2	765	853	920	2023	2317	2176	9.44235	9.21948	9.45279	21.7868	23.4493	22.4353	6.01623e-30	1.00945	up
WBGene00013544	Y75B8A.7	1954	1867	2039	1051	1195	1234	22.0151	18.4389	19.1377	10.3281	11.0334	11.6087	6.43096e-30	-1.09734	down
WBGene00016411	C34E10.10	1103	1205	1290	674	668	704	31.4894	30.1522	30.6826	16.8003	15.6237	16.781	7.4285e-30	-1.15295	down
WBGene00012717	Y39E4B.6	1233	1574	1272	3539	3765	3642	21.1247	23.3387	19.1604	54.9031	49.6616	49.5566	7.90374e-30	1.06871	up
WBGene00021512	Y41D4B.4	1603	1471	1679	921	896	891	20.3726	16.3754	17.7604	10.2078	9.27362	9.4177	1.01844e-29	-1.15502	down
WBGene00019759	M03F4.6	1077	1414	1726	332	600	521	20.3141	23.3696	27.1148	5.46066	9.27322	8.20215	1.01949e-29	-1.84534	down
WBGene00016424	C34H4.1	126	171	137	627	791	809	2.83259	3.36445	2.66852	12.4121	14.6736	15.3534	1.07811e-29	1.97372	up
WBGene00011694	T10G3.3	3238	3235	3407	1752	1655	2202	90.1541	78.9298	79.0172	42.5743	37.7628	51.2099	1.29723e-29	-1.15869	down
WBGene00000530	clh-3	346	535	582	1623	1802	1640	2.68704	3.58212	3.73494	10.9136	11.3911	10.7367	1.30894e-29	1.44293	up
WBGene00001070	dpy-8	6387	8651	11217	3071	3022	2892	117.331	139.265	171.598	49.2281	45.4892	44.3629	1.48867e-29	-1.84598	down
WBGene00000967	dhs-3	2164	2628	3168	1496	1755	1648	60.7003	64.4464	73.9608	36.6222	40.2659	38.7822	1.53226e-29	-1.03371	down
WBGene00016996	D1005.2	1222	1320	1741	742	788	649	21.6559	20.4902	25.6864	11.4658	11.4443	9.59493	2.06198e-29	-1.30391	down
WBGene00016645	C44C1.6	246	152	161	970	1221	1094	12.6642	6.87399	6.92437	43.7135	51.6852	47.1748	2.2799e-29	2.13644	up
WBGene00004920	snr-7	1284	1626	1464	706	877	772	74.4611	82.6803	70.7422	35.7216	41.6861	37.4116	2.30532e-29	-1.23233	down
WBGene00001446	flp-3	1445	1340	1274	3754	3655	4087	46.7304	37.9884	34.3184	105.985	96.9243	110.435	2.71703e-29	1.13868	up
WBGene00007859	mrps-31	1936	2229	2132	1250	1459	1205	38.2104	38.548	35.0333	21.5313	23.5942	19.8574	2.74867e-29	-1.03027	down
WBGene00008301	pals-39	29	45	19	488	642	302	0.598103	0.819813	0.329269	8.99202	11.1072	5.324	2.75606e-29	3.37756	up
WBGene00013738	elpc-2	2196	2372	2383	1227	1567	1481	25.3349	23.8808	22.7949	12.3259	14.7911	14.2306	3.08094e-29	-1.04653	down
WBGene00008577	F08G2.5	357	274	274	52	51	33	12.6239	8.48547	8.08858	1.60858	1.46048	0.958319	3.21327e-29	-2.96357	down
WBGene00003968	peb-1	1971	2669	3158	1308	1562	1183	25.3868	30.0229	33.8551	14.7085	16.4306	12.7128	3.4787e-29	-1.26993	down
WBGene00015424	C04E6.8	228	254	247	37	44	26	14.0111	13.6889	12.6498	1.96968	2.17832	1.30635	3.5994e-29	-2.98058	down
WBGene00003691	nhr-101	475	480	469	1545	1499	1401	10.15	8.99095	8.33319	28.8094	26.2656	25.0021	4.08512e-29	1.2809	up
WBGene00000098	air-1	1331	1546	1765	760	981	846	27.2918	27.7311	30.3711	13.5399	16.4099	14.3413	4.64029e-29	-1.17903	down
WBGene00016970	C56E6.2	558	609	683	187	262	238	13.2755	13.0401	13.9024	3.90278	5.23463	4.85609	5.99127e-29	-1.74966	down
WBGene00003648	nhr-58	173	185	245	1140	914	803	3.74158	3.51041	4.42469	21.6128	16.2748	14.5577	6.29414e-29	1.87377	up
WBGene00023067	rpl-41.1	1026	1479	1334	428	559	628	86.0844	108.796	93.2201	31.3024	38.4522	43.9841	6.65635e-29	-1.57272	down
WBGene00012953	fbxa-216	554	507	582	189	209	201	11.1642	8.95709	9.7718	3.31708	3.45169	3.38676	6.75221e-29	-1.77939	down
WBGene00008584	irg-4	1608	1470	1785	947	951	833	38.9928	31.5407	36.127	20.0384	18.8954	16.8575	7.37882e-29	-1.17364	down
WBGene00018045	F35D11.4	740	1016	935	344	292	409	32.0666	38.5844	33.734	13.1056	10.5526	15.0712	7.6953e-29	-1.68159	down
WBGene00018150	epg-4	555	626	634	1583	1844	1644	11.2765	11.4071	11.053	28.1851	30.7269	27.5819	8.44688e-29	1.12746	up
WBGene00022141	chaf-2	1562	1854	2044	1087	933	1119	28.2853	29.4346	30.8517	17.1803	13.8605	16.9202	8.94705e-29	-1.1315	down
WBGene00016148	C26F1.3	1182	1166	1424	671	633	500	46.58	40.2571	46.7517	23.0728	20.4543	16.4589	9.14935e-29	-1.39613	down
WBGene00012858	Y44F5A.1	1273	1151	1186	525	652	511	26.3654	20.8896	20.4565	9.48993	11.0627	8.83611	1.37641e-28	-1.43967	down
WBGene00007638	C17D12.3	52	83	156	861	858	648	1.13322	1.59692	2.86417	16.6053	15.5376	11.9487	2.10067e-28	2.61367	up
WBGene00015776	dct-1	638	391	556	4614	4749	4572	15.5682	9.09215	11.3507	100.943	98.9962	95.4273	2.10997e-28	2.67448	up
WBGene00016740	C48B6.2	1059	826	1157	348	451	426	45.6791	31.2124	41.5785	13.0881	15.9437	15.3279	2.13715e-28	-1.64246	down
WBGene00003518	nac-2	270	297	354	1019	1070	1000	3.84485	4.17789	4.38643	13.6531	13.7098	11.959	2.7308e-28	1.38964	up
WBGene00011417	T04A11.2	221	337	270	1048	1153	1024	6.43877	8.61062	6.55683	26.7141	27.597	24.9753	2.79687e-28	1.59689	up
WBGene00007886	ethe-1	125	112	97	553	686	662	4.04529	3.17791	2.63422	15.7183	18.3324	18.0264	2.80532e-28	2.10175	up
WBGene00017422	F13C5.1	65	80	59	433	466	474	2.04907	2.23008	1.54596	12.0218	12.1483	12.5796	3.06464e-28	2.33327	up
WBGene00019658	K11H12.1	695	886	972	333	419	294	41.7126	46.575	48.5821	17.4377	20.6122	14.7168	3.18341e-28	-1.60799	down
WBGene00020083	R57.2	1036	1327	1604	597	530	362	37.1269	41.7041	47.8978	18.6642	15.5732	10.8225	3.45907e-28	-1.72246	down
WBGene00012819	Y43F8B.9	37	55	57	434	363	387	1.53573	1.98388	1.96369	15.7985	12.4164	13.4746	3.48364e-28	2.56436	up
WBGene00011416	T04A11.1	485	434	437	1460	1463	1597	13.9478	10.9322	10.4534	36.6544	34.4911	38.3752	3.49458e-28	1.36921	up
WBGene00045208	F13E9.15	494	700	612	1673	2290	2034	33.6446	41.7305	34.7167	99.3936	127.821	115.684	3.52501e-28	1.37273	up
WBGene00021932	cox-18	1539	1516	1493	829	821	903	39.8585	34.411	32.1889	18.7319	17.4111	19.5347	3.70066e-28	-1.1778	down
WBGene00185067	Y54G11A.17	1073	1289	1255	565	709	669	62.7326	66.0689	61.1503	28.8102	33.9866	32.6667	4.1224e-28	-1.23438	down
WBGene00003473	mtl-1	5	28	24	1086	1222	1363	0.351447	1.77791	1.44759	70.5781	74.6193	84.7797	4.60673e-28	4.88682	up
WBGene00010985	R03A10.5	118	108	104	525	627	615	2.46947	1.98411	1.8132	9.64348	10.8213	10.8061	7.88344e-28	2.02242	up
WBGene00020188	T03F1.6	58	41	50	388	394	406	1.3139	0.80233	0.939779	7.73161	7.36547	7.74641	8.05847e-28	2.55161	up
WBGene00017048	D2021.4	212	202	206	838	836	786	5.49757	4.73519	4.58206	19.2871	18.4204	17.5412	8.11794e-28	1.61516	up
WBGene00004989	spp-4	802	1011	1026	438	470	513	51.8347	57.0967	55.0431	24.6396	24.789	27.5769	9.50812e-28	-1.32909	down
WBGene00008762	ztf-2	2028	2490	3133	1260	1198	1557	30.5801	32.9028	39.342	16.5687	14.8079	19.61	9.89856e-28	-1.25414	down
WBGene00001752	gst-4	1458	1050	1381	6588	6925	7333	49.3583	31.1292	38.9244	194.599	192.141	207.329	1.13584e-27	2.02216	up
WBGene00003156	mcm-4	2820	3043	3633	1610	2025	2161	29.9075	28.2668	32.1438	14.8887	17.5865	19.1471	1.21996e-27	-1.0503	down
WBGene00019592	K09F6.9	312	337	376	1182	1193	1017	3.18068	3.01319	3.19397	10.5466	9.99944	8.67932	1.25701e-27	1.36815	up
WBGene00012966	exos-1	1273	1261	1364	694	722	794	44.8692	38.9722	40.0526	21.3345	20.8634	23.3823	1.26864e-27	-1.16035	down
WBGene00021072	W07B8.4	184	175	252	923	1343	827	4.60405	3.79482	5.30568	19.5861	27.0443	16.9135	1.47672e-27	1.95512	up
WBGene00007288	C04A11.5	10	12	2	249	232	214	0.611022	0.614314	0.086178	13.3134	11.6737	10.9438	1.716e-27	4.05949	up
WBGene00014053	ZK669.3	5	0	5	185	183	204	0.155138	0	0.146211	6.18132	5.7488	6.54853	1.7366e-27	4.69054	up
WBGene00012945	Y47H9A.1	167	134	105	821	846	706	3.67486	2.5902	1.92084	15.8242	15.3314	13.0209	1.78973e-27	2.12979	up
WBGene00016978	C56G2.3	1398	1568	1708	830	933	1024	26.3786	25.7926	26.8969	13.2012	13.9189	15.6999	2.53948e-27	-1.08427	down
WBGene00001478	fmo-3	418	342	460	1558	1295	1573	6.80101	4.87019	6.22093	22.0599	17.2333	21.3468	2.62002e-27	1.49472	up
WBGene00007963	cyp-25A1	29	27	41	325	332	292	0.502861	0.412686	0.598226	5.02505	4.81932	4.31878	2.89543e-27	2.82281	up
WBGene00002256	lbp-4	1319	1285	1612	803	760	622	61.8961	52.8475	62.9024	32.8979	29.2171	24.3297	3.03518e-27	-1.28213	down
WBGene00016768	cyp-33E1	436	479	490	1322	1517	1305	7.87364	7.46893	7.37177	20.777	22.4388	19.6733	3.21851e-27	1.20304	up
WBGene00006965	xtr-1	154	165	154	620	732	742	4.82591	4.54058	4.01933	17.0042	18.8798	19.4951	3.41499e-27	1.76608	up
WBGene00007452	C08F11.3	20	38	31	367	300	299	0.516581	0.866234	0.662451	8.38453	6.43945	6.54154	3.95488e-27	2.95626	up
WBGene00003797	npp-11	3182	3151	3625	2028	1840	2351	33.9298	29.4469	32.196	18.8719	16.0816	20.9355	4.45861e-27	-1.01975	down
WBGene00001390	far-6	384	473	371	1572	1678	1260	9.76129	10.5498	7.85569	34.9283	35.0388	26.8046	4.65243e-27	1.5066	up
WBGene00019477	cest-17	634	659	832	2179	2171	1793	8.49058	7.7325	9.27472	25.4646	23.835	20.0568	4.97601e-27	1.18047	up
WBGene00009078	rpb-12	563	553	563	171	151	223	47.8004	41.1287	39.8269	12.679	10.4606	15.824	5.04539e-27	-1.93526	down
WBGene00008856	F15D3.6	1374	1388	1276	3812	3601	3298	39.8627	35.2814	30.8156	96.5004	85.626	79.909	5.3632e-27	1.04752	up
WBGene00004178	prg-1	1456	1559	1608	901	1057	928	15.1499	14.2104	13.9273	8.18117	9.01464	8.06119	5.91793e-27	-1.02371	down
WBGene00302968	Y62E10A.24	1322	1257	1543	767	859	765	62.8069	52.2978	61.0272	31.7762	33.4159	30.3391	6.25711e-27	-1.12605	down
WBGene00013740	hut-1	1845	1821	2177	1272	1081	1183	41.4896	35.9492	40.909	25.2018	19.7833	22.173	6.31946e-27	-1.06292	down
WBGene00010397	suox-1	1557	1809	2018	1115	955	1135	23.7181	24.1509	25.6112	14.8204	11.9039	14.4379	6.97457e-27	-1.08212	down
WBGene00017667	ttr-37	36	21	18	373	346	279	1.78096	0.891224	0.733614	16.0967	14.0389	11.5306	7.90616e-27	3.17843	up
Caenorhabditis_elegans_newGene_703	-	444	466	494	181	150	150	2.61653	2.44055	2.30468	0.878079	0.681393	0.693549	8.02705e-27	-1.85774	down
WBGene00009889	F49E11.2	738	995	1156	467	417	430	16.1439	19.2025	21.3328	8.81899	7.37097	7.77912	8.72098e-27	-1.45423	down
WBGene00016218	pals-23	363	378	531	1456	1409	1305	11.1136	9.81029	13.3127	38.9808	34.9122	32.834	8.76241e-27	1.36126	up
WBGene00016863	cest-35.2	27	40	30	319	317	301	0.419524	0.554348	0.394645	4.43987	4.14363	3.9977	8.91586e-27	2.80111	up
WBGene00010945	chil-13	148	201	301	1160	1021	924	2.69025	3.19949	4.55361	18.4252	15.2294	14.0511	8.96336e-27	1.89316	up
WBGene00002018	hsp-16.41	328	300	281	41	67	27	14.2126	11.394	10.1611	1.52215	2.37145	0.959705	8.96545e-27	-2.9653	down
WBGene00012998	Y48C3A.20	1742	1771	1851	1077	1106	1216	33.0629	29.4483	29.2544	17.8262	17.2069	19.2744	1.21346e-26	-1.00257	down
WBGene00021829	mrpl-17	1785	1888	1942	1035	993	1250	73.1442	68.8178	67.2266	37.28	33.8059	40.2932	1.21834e-26	-1.11698	down
WBGene00001858	hil-7	225	282	339	990	1075	933	11.4108	12.6884	14.1849	42.0321	43.7587	39.6691	1.39379e-26	1.46957	up
WBGene00017376	F11C7.2	1253	1334	1403	336	530	640	67.8616	63.3374	63.2717	15.8452	23.5254	28.9438	1.46466e-26	-1.72821	down
WBGene00003523	nas-4	704	1121	1323	440	369	373	13.6652	19.0779	21.546	7.34427	5.99168	6.18143	1.91371e-26	-1.71239	down
WBGene00007552	C13C12.2	608	656	674	287	314	281	11.4522	10.8326	10.5648	4.71618	4.84309	4.41196	2.24102e-26	-1.46742	down
WBGene00019699	math-34	28	43	59	381	512	324	0.466271	0.649604	0.841227	5.72051	7.23514	4.66111	2.26448e-26	2.7699	up
WBGene00012728	Y39G8B.9	552	730	558	223	243	212	38.1326	44.1704	32.1091	13.435	13.7564	12.2212	2.34121e-26	-1.76129	down
WBGene00017798	slc-17.8	753	977	1024	342	310	457	10.7335	12.2081	12.2164	4.29871	3.65926	5.43729	2.4933e-26	-1.62721	down
WBGene00018572	lin-42	7754	11262	13789	4053	3961	3807	88.1743	114.882	130.468	40.5459	36.2256	35.8887	2.84368e-26	-1.77098	down
WBGene00009033	F21H7.12	0	0	0	161	187	129	0	0	0	6.31311	6.89067	4.84221	3.19464e-26	5.7543	up
WBGene00022269	aatf-1	1288	1317	1545	684	877	811	23.1171	20.7195	23.0939	10.7093	12.9015	12.1493	3.74233e-26	-1.14626	down
WBGene00007236	C01G10.9	1361	1200	1367	650	696	758	29.5025	23.156	25.4455	12.0459	12.0723	13.0088	4.00317e-26	-1.24331	down
WBGene00011100	nhr-209	354	322	255	1500	1418	1137	6.34734	5.05931	3.79836	23.4979	20.8617	17.0407	4.08085e-26	1.73199	up
WBGene00014224	mrps-23	847	899	920	466	455	486	50.5651	46.965	45.4532	24.1495	22.0878	24.0145	4.09687e-26	-1.25956	down
WBGene00009330	F32D8.5	1099	1161	1426	724	640	688	31.8499	29.5229	34.3874	18.3125	15.1723	16.7549	4.16692e-26	-1.17743	down
WBGene00007890	C33A12.19	173	200	167	691	808	747	5.99382	6.07794	4.8246	20.9363	22.9964	21.6627	4.44655e-26	1.67826	up
WBGene00003763	nlp-25	36	39	30	274	351	386	3.70524	3.56867	2.59003	25.1029	30.2729	33.8737	5.1567e-26	2.7858	up
WBGene00022092	Y69A2AR.21	886	987	1007	498	554	433	44.2616	43.2089	41.894	21.7109	22.6868	18.0712	5.29024e-26	-1.29208	down
WBGene00009773	lipl-2	520	414	541	1585	1536	1600	11.3797	7.93017	9.85903	30.259	27.5371	29.2335	5.9628e-26	1.31518	up
WBGene00009978	F53E4.1	946	1028	1139	2646	3050	2357	16.2178	15.5426	16.1282	39.3664	42.601	33.6385	6.12411e-26	1.01877	up
WBGene00022540	ZC190.6	20	15	24	244	278	242	0.77207	0.532008	0.783983	8.64778	9.23063	8.19383	7.01558e-26	3.15502	up
Caenorhabditis_elegans_newGene_1795	-	1183	1181	1404	763	737	744	13.7057	11.9997	13.5624	7.7154	6.99286	7.19808	7.42147e-26	-1.08626	down
WBGene00021514	Y41D4B.11	1873	2011	2319	1351	1049	1241	45.8357	43.1205	47.312	28.8929	21.0298	25.3678	1.21555e-25	-1.10278	down
WBGene00009663	hda-5	99	80	89	444	570	534	1.72694	1.22785	1.29498	6.79745	8.19143	7.82991	1.27228e-25	2.11951	up
WBGene00000975	dhs-12	895	782	939	2162	2513	2627	29.7423	22.7759	25.9935	62.7167	68.467	72.9357	1.27301e-25	1.1214	up
WBGene00010304	clpf-1	1036	1064	1221	598	697	589	21.0908	19.0021	20.7378	10.6528	11.6255	10.0103	1.50762e-25	-1.15674	down
WBGene00011800	T16G1.6	50	84	72	631	468	407	0.946631	1.40674	1.14356	10.5931	7.37554	6.52681	1.6169e-25	2.44763	up
WBGene00003647	nhr-57	221	212	262	771	882	924	4.36386	3.66832	4.318	13.3265	14.3197	15.2896	1.77306e-25	1.52415	up
WBGene00010850	M04C3.1	864	811	1069	2898	2825	2238	6.66667	5.49525	6.83713	19.3378	17.6548	14.4278	1.82295e-25	1.18279	up
WBGene00020501	T14B4.5	676	778	975	340	423	340	23.8836	24.0829	28.6893	10.4827	12.2341	10.0297	2.12895e-25	-1.46175	down
WBGene00010480	tasp-1	1107	973	1484	3189	3371	3254	22.6239	17.2481	22.9666	57.1224	57.6641	56.0977	2.17071e-25	1.11165	up
WBGene00018413	cyp-33C4	89	99	102	450	534	495	1.63689	1.60733	1.57002	7.27306	8.10206	7.65512	2.41104e-25	1.95975	up
WBGene00006464	bath-47	278	347	426	1170	1149	1101	3.51401	3.83924	4.4813	12.9112	11.9193	11.6308	2.45935e-25	1.35146	up
WBGene00003707	nhr-117	381	354	387	1218	1362	1095	7.55757	5.81839	6.36954	20.6087	21.8339	18.0916	2.52883e-25	1.34563	up
WBGene00019636	gsto-3	199	288	338	1069	1213	930	6.32086	7.76366	8.59858	28.9075	30.7984	24.0445	2.53958e-25	1.60256	up
WBGene00009384	piit-1	370	300	245	59	48	59	12.4162	8.81513	6.83483	1.72188	1.29639	1.65587	2.59691e-25	-2.70983	down
WBGene00011364	cest-1.2	316	349	497	1347	1435	1187	3.95857	3.83019	5.19052	14.7385	14.7491	12.4349	3.23569e-25	1.41921	up
WBGene00003861	oig-3	583	531	483	1648	1878	1631	31.0927	24.782	21.4282	76.6921	82.1088	72.6647	3.3033e-25	1.31869	up
WBGene00045096	K01A6.7	0	6	10	169	210	208	0	0.405071	0.683241	12.7217	14.8732	15.0143	3.41189e-25	4.2725	up
WBGene00004001	pgp-7	82	87	41	534	551	566	0.59463	0.557771	0.24431	3.41477	3.309	3.46443	3.6132e-25	2.51361	up
WBGene00008605	mlt-9	2960	4261	5120	2525	2376	2210	38.0762	48.2562	55.0798	28.3697	25.0911	23.9452	3.93817e-25	-1.11744	down
WBGene00021460	zwl-1	1172	1105	1476	709	596	651	16.0976	13.333	16.8843	8.73092	6.95288	7.4854	4.0103e-25	-1.27082	down
WBGene00003390	mog-2	1771	1943	1778	975	955	1198	49.7093	50.0059	41.5695	24.7278	21.9473	29.1293	5.5526e-25	-1.15407	down
WBGene00011099	nhr-208	77	69	101	479	463	448	1.65765	1.30513	1.81609	9.03346	8.2033	8.09167	6.40034e-25	2.09569	up
WBGene00012628	Y38H6C.16	660	817	930	319	414	387	25.7218	27.8905	30.1621	10.8365	13.224	12.5681	7.4353e-25	-1.42796	down
WBGene00003082	lsm-8	1208	1364	1448	711	909	739	59.9459	59.3163	59.8501	30.7758	36.9666	30.5928	7.56274e-25	-1.10858	down
WBGene00022783	tomm-7	714	915	904	226	349	384	68.8352	77.3143	72.6378	19.0181	27.6071	30.9494	7.72808e-25	-1.71703	down
WBGene00008317	C54G4.7	832	897	750	2401	2227	2375	14.3557	13.5974	10.8194	36.0997	31.3516	34.1439	7.86468e-25	1.13631	up
WBGene00012917	Y46G5A.29	400	456	575	166	191	156	4.43326	4.4356	5.31302	1.60104	1.73008	1.44613	7.86468e-25	-1.78672	down
WBGene00003617	nhr-18	236	182	241	922	921	804	5.47872	3.69744	4.64942	18.6655	17.5267	15.5812	7.90561e-25	1.62927	up
WBGene00017950	F31E3.2	690	800	750	1986	1879	2244	11.9187	12.0609	10.8363	30.0348	26.7425	32.4716	8.51552e-25	1.09304	up
WBGene00015839	math-10	3	0	0	142	183	140	0.054234	0	0	3.35964	4.05447	3.16281	9.04545e-25	5.16801	up
WBGene00012466	ippk-1	849	704	756	2899	2698	2087	10.1717	7.38878	7.54837	30.3283	26.5092	20.8951	9.11226e-25	1.36293	up
WBGene00008692	scav-4	1126	1239	1405	626	689	801	16.7518	16.159	17.4189	8.13035	8.401	9.95168	9.76838e-25	-1.16801	down
WBGene00001636	gly-11	893	1036	1116	524	521	613	12.6143	12.8324	13.1282	6.45886	6.03689	7.22284	9.83575e-25	-1.20981	down
WBGene00020774	T24E12.5	66	95	65	417	641	473	0.853725	1.08657	0.704648	4.76815	6.89085	5.1827	1.05096e-24	2.33068	up
WBGene00015227	ddn-1	27	29	60	1938	2429	947	0.513568	0.49066	0.957419	32.8655	38.6925	15.3647	1.08135e-24	4.49482	up
Caenorhabditis_elegans_newGene_1273	-	102	109	75	469	665	608	1.34278	1.26503	0.819944	5.41767	7.21765	6.72544	1.13326e-24	2.18341	up
WBGene00017535	atf-8	661	906	1107	370	246	196	18.5952	22.3355	25.9477	9.09196	5.67774	4.58709	1.28745e-24	-2.00071	down
WBGene00008485	ugt-43	31	24	19	283	300	256	0.489768	0.337303	0.248689	4.14696	4.08898	3.5119	1.35144e-24	2.97386	up
WBGene00018547	clec-78	1336	1974	2447	972	1001	910	3.43343	4.44768	5.23896	2.17979	2.10844	1.95326	1.42927e-24	-1.31358	down
WBGene00003680	nhr-90	412	503	402	1410	1345	1381	8.67198	9.2832	7.04521	25.9297	23.2446	24.318	1.50664e-24	1.28845	up
Caenorhabditis_elegans_newGene_1275	-	27	21	28	245	295	264	0.476098	0.2969	0.30153	2.5088	2.88833	3.64005	1.56357e-24	2.89754	up
WBGene00002058	ifd-2	918	938	1002	510	574	525	16.8278	15.0695	15.3073	8.16248	8.63012	8.03894	1.80874e-24	-1.1693	down
WBGene00008389	D1086.2	37	33	54	354	437	287	1.3833	1.09368	1.7469	12.0933	14.0317	9.38461	1.84634e-24	2.65959	up
WBGene00013695	epg-8	699	684	737	1997	1763	2059	14.2419	12.2769	12.4575	34.5391	29.1484	34.4372	1.87025e-24	1.10067	up
WBGene00009533	F38B7.2	285	267	300	928	1100	904	7.7738	6.40089	6.81925	22.1739	24.761	20.6688	1.92128e-24	1.41497	up
WBGene00021347	rpb-10	627	1150	1149	237	304	392	50.7568	81.6412	77.5222	16.7299	20.1875	26.4671	2.01364e-24	-1.93545	down
WBGene00007904	C33G3.4	334	383	387	1089	1152	1045	3.26402	3.28472	3.15042	9.30257	9.24099	8.54138	2.06928e-24	1.21665	up
WBGene00017329	ugt-39	773	633	804	321	320	242	12.1093	8.58555	10.5095	4.35109	4.07927	3.17142	2.40272e-24	-1.64956	down
WBGene00013674	Y105E8A.14	1475	1636	1751	862	928	1113	26.529	25.7847	26.2267	13.5306	13.6748	16.722	2.64932e-24	-1.08204	down
WBGene00003697	nhr-107	287	326	373	1304	1435	947	6.89139	6.89408	7.45706	27.2214	28.2864	18.9256	2.69956e-24	1.53698	up
WBGene00043062	clec-80	748	933	960	392	406	496	19.3	20.083	20.7567	8.33891	8.16847	9.89795	2.76535e-24	-1.35653	down
WBGene00014004	fic-1	503	515	549	1395	1413	1416	8.30679	7.46214	7.55554	20.1375	19.1515	19.5603	3.20597e-24	1.07515	up
WBGene00009097	fipr-2	1690	1992	1795	3878	5144	5224	100.171	103.489	102.531	232.34	289.573	300.141	4.52302e-24	1.02178	up
WBGene00008850	F15B9.6	69	62	51	403	481	369	1.21682	0.961613	0.757824	6.27513	7.04092	5.4933	4.88253e-24	2.34326	up
WBGene00000753	col-180	759	1562	1629	448	486	493	21.6507	39.0427	38.692	11.1346	11.3565	11.7392	5.94622e-24	-1.75978	down
WBGene00007517	gpx-3	821	741	661	239	339	268	28.599	22.6177	19.1834	7.25564	9.6725	7.79837	6.23304e-24	-1.72665	down
WBGene00008915	F17C11.4	653	580	975	2699	2859	2067	18.8912	14.6887	23.4853	68.1659	67.8341	49.9569	8.56433e-24	1.43194	up
WBGene00013439	Y66D12A.13	354	363	390	1073	1078	1167	5.93222	5.32193	5.44424	15.6985	14.8158	16.3434	8.67161e-24	1.22509	up
WBGene00019854	R03H10.1	28	31	35	282	304	254	0.804065	0.76618	0.841135	7.15325	7.24914	6.16231	8.72376e-24	2.68885	up
WBGene00017751	F23F12.3	246	198	268	39	47	50	3.99327	2.82229	3.62656	0.551594	0.615404	0.67842	8.78342e-24	-2.62355	down
WBGene00011106	acl-5	1142	1436	1456	2923	4069	3448	19.1045	20.7662	19.9503	41.5534	55.0143	47.5253	9.42751e-24	1.02004	up
WBGene00012556	mrps-10	863	1035	1123	530	420	550	41.6805	43.8402	45.1712	22.3356	16.6383	22.1834	9.51834e-24	-1.33527	down
WBGene00015633	C09D4.2	278	158	301	1266	1206	1049	8.39294	4.18097	7.55052	33.3617	29.8592	26.4462	1.02742e-23	1.86529	up
WBGene00003522	nas-3	315	453	491	129	62	87	7.80828	9.83574	10.1334	2.77904	1.24744	1.80024	1.37684e-23	-2.41827	down
WBGene00007488	dph-2	1415	1544	1325	736	831	863	25.0057	23.9361	19.9813	11.4713	12.0523	13.2216	1.41731e-23	-1.16307	down
WBGene00008229	C50F4.1	922	831	1143	2914	2853	2329	20.1994	15.8476	20.6291	55.0521	50.852	42.0509	1.47152e-23	1.12973	up
WBGene00001372	exo-3	454	567	575	219	213	241	12.7748	13.9881	13.4896	5.38571	4.90964	5.67558	1.5118e-23	-1.56468	down
WBGene00007989	fipr-22	35	50	35	348	331	293	1.43739	1.84139	1.2233	12.7752	11.4102	10.3055	1.53348e-23	2.56137	up
WBGene00007549	spin-1	1838	2178	2154	1119	1205	1469	29.1911	30.3055	28.49	15.4985	15.685	19.4733	1.57923e-23	-1.04065	down
WBGene00044481	ZK185.5	94	153	95	653	797	534	2.2644	3.24095	1.90003	13.7886	15.8091	10.7934	1.75543e-23	2.12551	up
WBGene00017756	F23F12.12	101	124	151	500	791	624	2.86657	3.09849	3.57394	12.4641	18.5171	14.8819	1.78014e-23	1.95917	up
WBGene00007972	prp-4	987	1179	1167	590	578	699	16.9628	17.7671	16.7023	8.85019	8.14578	10.0302	1.89505e-23	-1.17094	down
WBGene00007194	B0491.7	1093	1189	1190	683	764	697	31.1736	29.7237	28.2651	16.9831	17.8525	16.6084	2.14491e-23	-1.03812	down
WBGene00020148	T01D1.3	178	300	252	1133	899	946	6.19288	9.17907	7.31452	34.5369	25.7401	27.6049	2.2501e-23	1.66347	up
WBGene00015896	C17C3.15	98	124	163	578	585	573	3.29336	3.63263	4.55013	16.9674	16.1151	16.0872	2.29113e-23	1.80102	up
WBGene00023419	F53F4.16	951	1156	890	436	525	488	65.0755	69.3389	50.703	26.0412	29.4157	27.8779	2.40746e-23	-1.38661	down
WBGene00015620	C08G9.2	830	983	1378	455	347	501	3.34906	3.47564	4.63391	1.60025	1.14728	1.68666	2.5841e-23	-1.59661	down
WBGene00008177	C48D1.1	312	386	321	1090	1077	1075	4.70009	5.05843	3.96473	14.1999	13.258	13.4964	2.67664e-23	1.30729	up
WBGene00015930	cest-4	198	234	352	937	1034	989	2.86731	2.96758	4.24918	11.8681	12.3062	11.9955	2.833e-23	1.56035	up
WBGene00012950	eif-2Bbeta	1124	1267	1430	833	779	799	26.1478	25.8393	27.7064	16.9067	14.8607	15.5217	2.86169e-23	-1.00051	down
WBGene00017348	F10E7.6	1247	1461	1298	837	811	761	57.1894	58.7035	49.5634	33.4857	30.48	29.1384	2.95399e-23	-1.07558	down
WBGene00007145	B0334.5	1346	1643	1488	851	856	993	26.4978	28.3476	24.406	14.6171	13.8085	16.3213	3.6277e-23	-1.06909	down
WBGene00005000	spp-15	457	473	389	1616	1729	1266	22.4202	20.3241	15.8832	69.2281	69.5645	51.8973	3.63212e-23	1.42989	up
WBGene00018384	F43C11.7	186	178	99	2284	2046	1932	5.49594	4.61592	2.43134	59.1701	49.7757	47.9012	3.70528e-23	3.16704	up
WBGene00004113	pqn-24	883	903	1216	2776	3074	2336	24.7616	22.1787	28.3855	67.9161	70.66	54.6958	3.75221e-23	1.0974	up
WBGene00013947	ZK228.4	1888	1944	1748	1113	1149	1215	56.5144	51.022	43.5121	29.0207	28.3349	30.376	4.71728e-23	-1.0304	down
WBGene00003057	lon-3	2053	3053	3775	1708	1592	1528	50.7172	66.093	77.6563	36.8054	32.2291	31.5147	4.71765e-23	-1.1963	down
WBGene00000675	col-101	70	116	50	574	555	549	1.86991	2.57278	1.0575	13.0374	11.7472	12.0872	5.06852e-23	2.38649	up
WBGene00015788	C15B12.8	35	15	23	266	281	317	0.75658	0.279757	0.409175	5.03031	4.99461	5.73392	5.50184e-23	3.01168	up
WBGene00007748	C26E1.2	208	165	194	754	720	813	3.90799	2.72731	3.10306	12.5976	11.2581	12.9862	5.8812e-23	1.63134	up
WBGene00045246	C29E4.15	727	895	1059	490	398	414	28.5098	30.7679	34.6147	16.753	12.7757	13.5528	6.03653e-23	-1.36224	down
WBGene00021121	W09G12.7	109	117	168	606	787	539	2.21735	2.08208	2.83702	10.7645	13.1214	9.16042	6.04132e-23	1.90899	up
WBGene00004811	skr-5	56	82	57	432	422	372	3.10297	3.94997	2.62506	20.8976	19.1857	17.198	6.16324e-23	2.23226	up
WBGene00021531	Y42G9A.1	151	158	169	651	705	567	3.61017	3.29473	3.35509	13.5855	13.8235	11.323	6.81883e-23	1.63259	up
WBGene00000870	cyd-1	1722	2293	2628	1404	1293	1439	23.7926	29.75	30.2406	16.9438	14.6965	16.621	7.59788e-23	-1.01176	down
WBGene00003721	nhr-131	264	296	244	1023	890	950	5.13968	5.1215	3.97916	17.8404	14.2467	15.4958	7.92892e-23	1.46147	up
WBGene00010086	F55B11.4	312	462	399	1097	1447	1419	15.7558	20.4572	16.7822	48.3737	59.9208	59.8524	8.11368e-23	1.39528	up
WBGene00011419	T04A11.4	418	384	374	1188	1212	1348	12.0025	9.67272	8.95693	29.815	28.5701	32.3817	8.54552e-23	1.30336	up
WBGene00020908	VC5.2	602	588	607	1631	1585	1552	8.65179	7.4039	7.26886	20.4931	18.5941	18.6414	1.02614e-22	1.04979	up
WBGene00013986	ZK512.7	277	258	333	51	43	82	14.3986	11.7721	14.429	2.28048	1.83536	3.56891	1.02614e-22	-2.5363	down
WBGene00019803	PDB1.1	766	630	817	1992	1985	2161	17.5776	12.6781	15.6123	39.8506	37.3168	41.5325	1.23673e-22	1.11302	up
WBGene00007402	ugt-60	1282	1224	1607	852	758	805	20.7119	17.327	21.6178	12.0019	10.0365	10.8621	1.26513e-22	-1.10263	down
WBGene00020569	lgc-32	249	209	311	943	1008	848	5.53919	4.0874	5.77037	18.361	18.4383	15.8065	1.4146e-22	1.49707	up
WBGene00013849	ZC84.6	441	651	760	226	264	234	2.5986	3.36249	3.73052	1.15824	1.27277	1.14955	1.41675e-22	-1.65859	down
WBGene00015479	wht-1	104	114	110	518	625	451	1.37978	1.52945	1.20261	6.05752	6.84188	5.03767	1.63011e-22	1.88644	up
WBGene00219208	B0365.9	945	1140	1379	602	352	381	28.931	30.609	35.1725	16.0803	8.83445	9.74581	1.82348e-22	-1.6777	down
WBGene00009966	isy-1	1228	1372	1329	871	801	811	38.3715	37.5615	34.5475	23.737	20.4525	21.1169	1.99336e-22	-1.0035	down
WBGene00009801	ipla-2	646	840	1078	2276	2480	2218	4.91215	5.59525	6.82768	15.1063	15.4616	14.0942	1.99756e-22	1.10112	up
WBGene00013079	ttr-26	2166	2408	2990	1658	1707	1283	104.946	102.316	120.738	70.128	67.8065	51.861	2.01785e-22	-1.03599	down
WBGene00018755	bcmo-2	355	421	564	1377	1362	1289	5.96314	6.19643	7.89569	20.2139	18.7932	18.1205	2.51531e-22	1.24015	up
Caenorhabditis_elegans_newGene_653	-	37	44	60	350	319	317	0.87511	0.920006	1.19793	7.87488	6.64494	6.75288	2.52699e-22	2.3782	up
WBGene00007957	C35C5.8	210	237	332	855	962	900	4.01977	3.97637	5.28564	14.2807	15.1997	14.5626	2.66941e-22	1.4456	up
Caenorhabditis_elegans_newGene_294	-	79	101	107	539	447	449	1.64327	2.04553	2.08702	10.9551	8.84404	8.74699	2.68876e-22	1.93456	up
WBGene00020865	T27E4.7	295	477	489	1591	1539	1226	14.3138	20.3377	19.8165	67.5427	61.3973	49.8207	2.98558e-22	1.4357	up
WBGene00005078	src-2	1480	1871	1922	959	938	1214	24.1249	26.7427	26.1013	13.6401	12.5382	16.5253	3.26007e-22	-1.09359	down
WBGene00011420	T04A11.5	171	187	129	673	967	720	4.97445	4.77101	3.11659	17.1489	23.1507	17.5722	3.55957e-22	1.87125	up
WBGene00021963	lipl-6	575	732	911	276	360	344	8.5897	9.58296	11.3391	3.58866	4.40446	4.28966	3.75582e-22	-1.49327	down
WBGene00022117	Y71F9AL.12	1043	1024	1192	682	650	597	33.2968	28.6468	31.7096	18.9892	17.0016	15.9172	3.89401e-22	-1.0952	down
WBGene00009925	F52B11.2	1240	1250	1455	680	868	830	30.6144	27.4706	30.3817	14.2904	17.2431	17.0345	3.91672e-22	-1.07051	down
WBGene00018878	glit-1	2212	2797	2465	1479	1335	1747	25.2534	27.9812	23.4348	14.7302	12.4925	16.6591	3.96874e-22	-1.0505	down
WBGene00006684	twk-32	101	156	144	549	873	603	1.49191	2.01879	1.76961	7.10492	10.6097	7.46595	4.05086e-22	1.94351	up
WBGene00015695	ugt-26	278	461	489	1489	1324	1342	4.03654	5.87757	5.92548	18.9108	15.7917	16.3114	4.23642e-22	1.40974	up
WBGene00019220	pfd-2	1683	2017	1953	902	1292	1175	82.7802	86.9369	79.9765	38.6803	52.0632	48.2562	4.4515e-22	-1.08721	down
WBGene00018424	pgph-2	1609	1243	2137	9857	10769	13926	36.9225	24.9841	40.8443	197.408	202.58	266.925	4.53638e-22	2.36038	up
WBGene00010740	K10D3.6	249	147	252	1199	1128	833	8.6451	4.45914	7.29359	36.4391	32.1778	24.223	4.79831e-22	1.88728	up
WBGene00004385	rnp-2	1241	1396	1397	832	769	911	46.3877	45.7379	43.5115	27.1504	23.5605	28.4509	4.8033e-22	-1.02264	down
WBGene00018827	pst-2	879	1088	1182	606	654	639	20.3874	21.1174	22.9307	12.2242	12.3386	12.3461	4.87824e-22	-1.06314	down
WBGene00013131	pigl-1	892	935	977	565	559	539	31.8762	29.2914	29.0968	17.6321	16.3898	16.0928	5.71504e-22	-1.0936	down
WBGene00011400	T03F6.4	388	415	382	1162	1150	1143	8.3287	7.79675	6.82822	21.7689	20.2297	20.494	5.99112e-22	1.18216	up
WBGene00022115	Y71F9AL.10	533	594	797	1680	1741	1733	9.763	9.53669	12.1687	26.8874	26.1738	26.5381	6.356e-22	1.07577	up
WBGene00000005	aat-4	262	323	284	85	46	48	4.04383	4.36871	3.64779	1.14511	0.571237	0.614873	6.54367e-22	-2.51247	down
WBGene00077490	M03A1.8	220	213	314	889	888	838	4.67073	3.95483	5.5425	16.4834	15.4631	14.8622	6.86788e-22	1.44789	up
WBGene00021446	hlh-33	379	449	334	1248	1368	1192	8.43205	8.74426	6.17723	24.2397	24.9587	22.1664	7.44338e-22	1.3416	up
WBGene00013078	ttr-25	611	651	764	1538	1886	1904	29.4245	27.4611	30.637	64.6146	74.4631	76.5634	8.75245e-22	1.04233	up
WBGene00000715	col-142	115	137	124	546	502	636	3.05112	3.19182	2.7282	12.661	10.9244	14.1098	9.07945e-22	1.77902	up
WBGene00007178	B0457.2	539	642	687	1455	1917	1677	11.9914	12.5042	12.7185	28.2429	34.9594	31.1562	9.89047e-22	1.08096	up
WBGene00001399	fat-7	463	543	345	116	154	120	11.4198	11.7355	7.0876	2.48461	3.10635	2.47109	1.06383e-21	-2.09277	down
WBGene00016506	abhd-5.1	102	105	118	525	682	437	2.05631	1.85439	1.97256	9.23791	11.2862	7.36147	1.1173e-21	1.93948	up
WBGene00004180	pri-1	825	935	1106	515	600	545	17.2392	17.1474	19.2553	9.37299	10.4011	9.49427	1.13644e-21	-1.12091	down
WBGene00021296	Y25C1A.13	514	576	654	1402	2077	1722	13.6693	13.4323	14.4821	32.5664	45.3161	38.2678	1.15601e-21	1.21786	up
WBGene00011908	pash-1	640	631	614	300	291	228	6.95587	6.01788	5.64907	2.85612	2.68757	2.08506	1.15739e-21	-1.53245	down
WBGene00012032	T26C5.2	1358	1899	2337	1106	948	846	18.8616	23.1193	27.0392	13.4095	10.7975	9.81059	1.16841e-21	-1.26414	down
WBGene00009734	F45G2.8	1209	1172	1109	675	651	674	57.5952	48.9644	44.004	28.0555	25.4101	26.8188	1.17011e-21	-1.14815	down
WBGene00013975	ZK455.5	133	104	107	539	683	510	2.93256	2.0186	1.97402	10.4251	12.4101	9.44443	1.22846e-21	1.92246	up
WBGene00010931	M162.5	146	178	259	784	720	867	2.74819	2.92294	4.05066	12.8661	11.1032	13.6254	1.43794e-21	1.66189	up
WBGene00008588	F08G12.5	37	76	71	452	446	343	1.5557	2.76858	2.47254	16.5766	15.3822	12.0312	1.45953e-21	2.332	up
WBGene00017924	mrps-21	946	1025	1066	638	629	556	63.1804	59.9862	59.314	37.1435	34.4126	30.9776	1.50131e-21	-1.07551	down
WBGene00021270	pid-3	1291	1285	1702	792	913	912	34.0375	29.6841	37.3696	18.2233	19.719	20.0813	1.55714e-21	-1.04442	down
WBGene00006491	acl-3	593	772	764	354	323	378	15.5391	17.7205	16.6766	8.08892	6.93297	8.26493	1.68038e-21	-1.33788	down
WBGene00019318	K02E10.4	1158	1357	1745	837	642	785	20.843	21.4161	26.1856	13.1584	9.4694	11.794	1.9634e-21	-1.23313	down
Caenorhabditis_elegans_newGene_759	-	46	71	38	365	367	379	0.49871	0.947257	0.354629	3.58932	3.47987	3.45904	2.11454e-21	2.39237	up
WBGene00018897	zipt-2.4	1228	1558	1436	874	763	910	18.0958	20.1293	17.5898	11.2208	9.35462	11.2375	2.3735e-21	-1.06485	down
WBGene00021862	fbxa-48	0	0	0	146	86	128	0	0	0	2.58515	1.43721	2.17796	2.44894e-21	5.32756	up
WBGene00011997	nlp-51	437	534	600	1616	1422	1344	30.1767	32.3203	34.4933	97.4422	80.5311	77.5666	2.66195e-21	1.13098	up
Caenorhabditis_elegans_newGene_515	-	98	77	113	490	514	434	1.23097	0.691811	1.06319	5.75018	4.4475	4.25017	2.70212e-21	1.92279	up
WBGene00019388	K04F1.9	23	25	18	239	280	201	1.11393	1.02861	0.679824	10.4021	11.4288	8.35798	2.7347e-21	2.9064	up
WBGene00009908	F49H6.5	4	6	0	486	697	323	0.085421	0.118075	0	10.25	13.5277	6.39489	3.44536e-21	5.09202	up
WBGene00018928	F56B3.2	820	918	1230	536	425	507	14.4531	14.1834	18.0567	8.24375	6.13844	7.45808	3.51065e-21	-1.33398	down
WBGene00020157	T02B11.6	80	110	68	492	598	419	1.51487	1.82591	1.06813	8.18107	9.33851	6.66836	3.75919e-21	2.12505	up
WBGene00007404	best-5	148	63	95	623	749	678	2.86255	1.05795	1.5275	10.5142	11.8723	10.9492	3.89625e-21	2.28516	up
WBGene00001977	hmg-12	1076	1111	1125	588	714	690	27.6412	25.0219	24.0825	13.1813	15.0338	14.797	3.97348e-21	-1.07672	down
WBGene00012205	metl-1	1142	1509	1321	702	763	861	35.0847	40.6326	33.8057	18.8106	19.2088	22.0882	4.78215e-21	-1.10845	down
WBGene00008597	clec-55	23	32	45	448	321	230	0.54797	0.678504	0.904202	9.4716	6.38087	4.65756	4.97169e-21	2.82153	up
WBGene00011185	R10D12.1	146	140	291	1062	1134	757	2.43034	2.03283	4.03496	15.4402	15.484	10.5396	5.15375e-21	1.97318	up
Caenorhabditis_elegans_newGene_243	-	91	104	110	613	492	423	1.9326	1.94984	1.94007	11.4329	8.61601	7.54245	5.16969e-21	1.9312	up
WBGene00020392	knl-3	1015	1099	1096	661	638	692	22.934	21.7615	20.614	13.0268	11.8083	13.0496	5.35499e-21	-1.02993	down
WBGene00003161	mdf-2	789	829	1068	517	501	456	23.2132	21.2438	25.7133	13.2789	12.1025	11.1014	5.52788e-21	-1.19483	down
WBGene00003812	nrf-5	868	844	792	2030	2397	2103	12.7606	10.943	9.71463	26.0525	28.9858	26.0289	5.80721e-21	1.01918	up
WBGene00012162	sek-6	156	200	197	637	649	702	3.0143	3.39673	3.17228	10.7607	10.3061	11.3478	5.9012e-21	1.48061	up
WBGene00012192	W02A11.1	771	867	871	411	499	493	20.4958	20.0957	19.1584	9.37221	10.7838	10.8503	6.2694e-21	-1.17587	down
WBGene00017427	acp-5	555	557	598	1484	1530	1375	10.6025	9.3179	9.51888	24.7418	23.9646	21.9422	6.29127e-21	1.00382	up
WBGene00004123	pqn-36	753	984	988	512	520	539	7.20406	8.57906	8.07021	4.29784	4.00273	4.16385	6.84972e-21	-1.12612	down
WBGene00003836	nxt-1	1173	1086	1327	764	734	689	52.4915	42.6633	50.2262	29.8415	27.0271	26.0615	6.99306e-21	-1.05319	down
WBGene00012525	Y32B12C.1	38	64	57	342	378	308	1.05539	1.55689	1.32205	8.37646	8.70108	7.21029	7.45671e-21	2.26794	up
WBGene00021060	dct-11	360	298	335	1010	1074	1068	10.922	7.92362	8.45915	26.7641	26.7288	27.0758	8.53907e-21	1.29645	up
WBGene00009068	F23A7.3	110	76	119	590	476	508	3.08841	1.86121	2.77825	14.4588	10.9553	11.9194	1.02386e-20	1.96545	up
WBGene00017303	F09F7.6	383	330	303	1166	1470	1062	28.6989	21.6988	18.9148	76.4109	90.4923	66.5836	1.04706e-20	1.47832	up
Caenorhabditis_elegans_newGene_1227	-	427	401	458	1176	1173	1205	4.47643	3.69083	3.91979	10.5146	9.95863	10.881	1.10847e-20	1.10817	up
WBGene00010018	fbxa-69	20	23	8	214	286	214	0.436303	0.429427	0.140918	4.11762	5.17096	3.93555	1.16791e-20	3.17971	up
WBGene00011155	rbm-3.1	441	540	611	177	264	182	26.2497	28.1931	30.3189	9.20686	12.888	9.05499	1.20059e-20	-1.6643	down
WBGene00003716	nhr-126	219	282	327	970	847	886	4.15553	4.70491	5.17314	16.1089	13.2226	14.0812	1.30684e-20	1.35298	up
WBGene00022258	Y73C8B.1	107	122	194	747	666	558	2.80698	2.80194	4.23044	17.1398	14.3383	12.2436	1.35494e-20	1.84431	up
WBGene00007854	C31H5.1	4	3	4	175	164	101	0.086688	0.064283	0.080561	3.88248	3.42345	2.14022	1.45306e-20	4.19548	up
WBGene00013531	Y73F8A.26	771	991	1039	559	503	541	10.9223	12.3071	12.2682	6.90673	5.8388	6.40287	1.75089e-20	-1.13442	down
WBGene00002188	kgb-2	17	24	35	272	255	213	0.370999	0.467139	0.64353	5.35114	4.72473	4.01397	1.95321e-20	2.78283	up
WBGene00044078	tag-243	399	448	429	1181	1294	1084	13.7045	13.4938	12.2327	35.5254	36.6945	31.1533	2.22889e-20	1.12059	up
WBGene00007430	C08B6.10	138	179	183	625	607	599	3.8626	4.39219	4.26442	15.3211	13.9708	14.0496	2.25208e-20	1.5068	up
WBGene00013008	clec-146	193	208	192	628	837	722	8.26535	7.29112	6.39201	23.5154	27.4446	26.3038	2.30072e-20	1.50535	up
WBGene00004037	plc-2	603	620	723	1549	1907	1555	5.74786	5.1527	5.75877	12.9597	14.9731	12.426	2.68806e-20	1.00988	up
WBGene00011517	cgt-1	305	365	353	916	1119	984	5.4258	5.69129	5.22644	14.2104	16.3167	14.6107	2.69927e-20	1.20137	up
WBGene00012179	W01D2.1	23649	30759	27958	12391	15427	16249	2039.47	2332.15	2009.96	882.99	1093.36	1118.36	3.11311e-20	-1.23524	down
WBGene00022887	ZK1290.5	449	423	427	1322	1159	1375	11.1972	9.25837	8.78107	28.6657	24.3567	29.5197	3.51199e-20	1.20554	up
WBGene00017813	nlp-61	417	504	468	1362	1225	1222	21.7384	22.9934	20.2999	61.9589	52.333	53.1826	3.75642e-20	1.10022	up
WBGene00044697	poml-4	77	46	50	377	373	439	1.87598	0.966441	0.997162	8.00926	7.44751	8.93282	3.78662e-20	2.32123	up
WBGene00012850	Y44A6C.1	666	508	696	2399	2468	1593	14.543	9.72327	12.6644	45.7286	44.2017	29.0527	4.05881e-20	1.41496	up
WBGene00015040	cyp-34A5	10	29	27	254	271	209	0.16354	0.445713	0.398168	4.01281	4.02533	3.15168	4.18512e-20	2.93937	up
WBGene00011167	chil-23	171	131	199	753	816	583	3.64074	2.4381	3.51875	13.9927	14.2483	10.3615	4.84762e-20	1.71705	up
WBGene00016865	ets-9	312	311	337	1077	1016	871	5.81548	5.06323	5.23431	17.5586	15.5231	13.5703	5.1278e-20	1.26351	up
WBGene00015402	C03G6.17	467	456	553	1253	1467	1245	12.4783	10.6936	12.3142	29.2687	32.1969	27.8303	5.71966e-20	1.06936	up
WBGene00005642	srp-1	42	21	33	382	274	261	0.870487	0.38086	0.578827	7.02139	4.73557	4.5965	6.07706e-20	2.73554	up
WBGene00011429	T04C12.7	31	8	16	230	345	240	1.2581	0.280337	0.542596	8.18012	11.53	8.16987	6.28183e-20	3.22508	up
WBGene00014017	ZK632.10	506	843	729	1814	2202	1959	26.3559	40.0977	32.1749	80.4915	101.189	85.9098	8.28923e-20	1.17259	up
WBGene00021850	Y54F10AM.6	576	802	1002	375	383	378	14.0641	17.1614	20.6404	8.06979	7.75443	7.77159	1.02186e-19	-1.37891	down
WBGene00020741	dlhd-1	119	174	220	592	774	744	2.9053	3.72242	4.46196	12.6152	15.4898	15.1698	1.03543e-19	1.67201	up
Caenorhabditis_elegans_newGene_1347	-	332	404	348	1228	1090	1000	14.2548	15.5312	12.6667	46.4992	38.181	36.2133	1.0776e-19	1.25188	up
WBGene00000980	dhs-17	442	495	535	1229	1351	1190	6.99594	6.86037	7.04068	16.9622	17.5268	15.7275	1.17775e-19	1.00375	up
WBGene00017214	F07E5.9	13	4	3	206	281	115	0.220552	0.054077	0.031824	3.25148	4.17344	1.7299	1.37325e-19	3.91624	up
WBGene00020532	math-42	143	184	195	636	641	583	1.6694	1.88268	1.89433	6.49484	6.14841	5.70831	1.39841e-19	1.46851	up
WBGene00303026	T20D3.14	1162	1032	1159	692	671	662	81.5523	63.4478	67.7066	42.3523	38.6002	38.8007	1.42758e-19	-1.07115	down
WBGene00016152	pho-12	28	7	38	259	334	319	0.569798	0.116291	0.63731	4.60708	5.59839	5.44435	1.56244e-19	3.05502	up
WBGene00000009	aat-8	36	22	33	247	290	240	0.666765	0.35748	0.509745	4.07885	4.51217	3.80232	1.71632e-19	2.59674	up
WBGene00022056	ddx-35	786	762	972	465	414	491	9.48572	8.05368	9.76413	4.89051	4.08793	4.94545	1.76058e-19	-1.20937	down
WBGene00045379	C45B11.6	859	1056	1216	489	522	278	15.6772	16.8859	18.491	7.79177	7.80741	4.23645	1.83445e-19	-1.59045	down
WBGene00018046	coa-3	799	1036	1022	530	627	511	37.92	43.1074	40.4181	21.9321	24.417	20.2654	1.94959e-19	-1.11016	down
WBGene00019381	K04C2.3	1000	900	1236	2667	3104	2350	48.8897	38.6405	50.2894	113.84	125.321	96.7484	2.09752e-19	1.01828	up
WBGene00015889	C17C3.3	31	37	41	276	315	225	0.739519	0.765116	0.812992	5.75327	6.17539	4.48691	2.10442e-19	2.44297	up
WBGene00015515	spdl-1	1294	1214	1428	703	924	675	22.4405	18.4441	20.6274	10.6313	13.1319	9.77912	2.41355e-19	-1.11544	down
WBGene00020258	T05E7.1	394	412	432	1078	1093	1120	7.45132	6.82519	6.79916	17.8077	16.9538	17.708	2.82845e-19	1.05391	up
WBGene00021478	Y39H10A.1	0	9	5	162	195	113	0	0.450292	0.221466	9.04676	10.2464	6.01389	2.99513e-19	4.02636	up
WBGene00015371	C03A7.13	12	35	26	244	250	237	0.206824	0.531767	0.373787	3.79628	3.65426	3.52503	3.25674e-19	2.80495	up
WBGene00015423	C04E6.7	421	453	439	1545	1182	1223	10.6866	10.0736	9.27872	34.2471	24.6126	25.9474	3.44341e-19	1.22792	up
WBGene00012629	slc-36.3	150	146	142	598	617	506	2.88425	2.45203	2.26964	10.0621	9.7395	8.14495	4.71658e-19	1.59035	up
WBGene00008352	fbxa-6	388	389	366	1270	1306	986	8.93063	7.84954	7.00809	25.5098	24.643	18.9532	4.84701e-19	1.2703	up
WBGene00020456	fbxa-60	74	94	105	385	426	430	1.75569	1.9613	2.0887	8.04126	8.35949	8.60102	5.22132e-19	1.79826	up
WBGene00015043	cyp-34A8	108	177	229	767	684	699	1.81612	2.61849	3.20266	11.3099	9.4288	9.86785	5.31222e-19	1.70057	up
WBGene00012381	Y2H9A.4	337	223	294	1009	1257	958	5.01184	2.81225	3.47945	12.8546	15.5743	11.9161	5.62758e-19	1.5277	up
WBGene00022445	Y110A2AL.9	83	81	71	356	410	423	4.674	3.97809	3.31266	17.5085	18.9726	19.943	6.57251e-19	1.92703	up
WBGene00013516	Y73F4A.3	495	460	437	1324	1412	1227	22.6801	18.4492	16.6851	52.9791	53.0513	46.9903	6.70798e-19	1.14153	up
WBGene00013091	Y51B9A.9	41	57	77	326	357	332	0.870895	1.07107	1.38317	6.16609	6.34509	6.01611	7.09084e-19	2.12504	up
WBGene00008768	F13G3.10	816	1023	971	438	605	533	62.1438	68.4582	61.5056	28.937	37.7221	33.9275	8.8002e-19	-1.16943	down
WBGene00008510	lipl-7	495	456	641	1447	1410	1400	10.3264	8.34371	11.1396	26.3524	24.1233	24.4114	9.87829e-19	1.06699	up
WBGene00021256	Y22D7AR.2	67	78	74	397	349	354	0.451954	0.458527	0.412717	2.33657	1.92842	1.99213	1.004e-18	1.9256	up
WBGene00003649	nhr-59	103	132	105	515	461	481	1.99809	2.23434	1.71345	8.79112	7.40217	7.95062	1.03109e-18	1.71213	up
WBGene00022232	exos-2	708	809	894	420	467	511	18.6997	18.7419	19.6705	9.67882	10.1206	11.2667	1.14772e-18	-1.11905	down
WBGene00021587	clec-76	572	557	613	1319	1569	1585	9.7	8.2149	8.64059	19.1238	21.5829	22.224	1.1619e-18	1.00228	up
WBGene00013074	hmit-1.2	170	125	85	1400	1626	1889	2.09125	1.34939	0.867301	15.0685	16.4422	19.4642	1.21362e-18	3.05903	up
WBGene00016788	C49G7.10	43	35	60	278	313	303	1.26099	0.901362	1.52024	7.17807	7.61033	7.49264	1.5213e-18	2.25761	up
WBGene00006447	tag-72	709	867	851	381	520	438	15.5512	16.6655	15.5313	7.28285	9.33797	8.00827	1.72424e-18	-1.19203	down
WBGene00012123	T28D6.3	164	198	219	612	639	712	7.30182	7.73018	8.15358	23.8944	23.4188	26.6024	1.75423e-18	1.39353	up
WBGene00016719	math-24	103	129	110	515	481	440	2.14484	2.35798	1.90351	9.38042	8.2321	7.66062	1.79405e-18	1.68457	up
WBGene00017160	F01F1.3	213	212	272	835	943	661	6.91308	6.02303	7.36157	23.6844	25.1209	17.94	1.91359e-18	1.43836	up
WBGene00019498	K07E8.7	697	851	960	477	493	520	14.2027	15.0862	16.2261	8.41917	8.18334	8.77943	2.0381e-18	-1.08129	down
WBGene00010125	dod-22	168	162	175	590	598	578	3.9871	3.55082	3.46244	12.3386	11.9557	11.4972	2.04313e-18	1.43314	up
WBGene00008565	acox-1.2	435	592	699	167	288	199	5.9079	7.03996	7.9049	1.97592	3.19946	2.25707	2.22012e-18	-1.69937	down
WBGene00022546	ZC196.2	2	0	0	109	97	99	0.050059	0	0	2.53952	2.12616	2.20753	2.51782e-18	4.72564	up
WBGene00016671	C45G7.4	365	390	434	987	1066	1160	5.26819	4.93364	5.21958	12.4479	12.6197	14.0003	2.69001e-18	1.0786	up
WBGene00002133	inx-11	219	120	165	820	795	709	3.9201	1.87322	2.46541	12.5152	11.6383	10.5887	2.69685e-18	1.79335	up
WBGene00009395	clec-64	399	467	593	223	169	211	8.93747	9.16906	11.0712	4.36333	3.10708	3.936	2.71838e-18	-1.57785	down
WBGene00003712	nhr-122	215	262	242	901	710	784	5.12784	5.48499	4.82443	18.8152	13.9195	15.6658	2.80289e-18	1.37122	up
WBGene00012715	snpc-1.2	483	451	503	236	217	214	8.26799	6.76109	7.16159	3.52132	3.03271	3.04742	2.87823e-18	-1.43399	down
WBGene00018195	btb-16	243	123	168	845	948	790	6.99811	3.07976	4.02037	21.2228	22.3805	18.999	2.89486e-18	1.85163	up
WBGene00009476	F36F2.2	430	360	378	1184	1276	1068	12.8373	9.42154	9.3986	30.8755	31.2512	26.6468	2.91671e-18	1.22266	up
WBGene00005833	srw-86	95	75	120	506	540	383	4.96021	3.45613	5.2505	23.1969	23.2917	16.7974	3.6553e-18	1.8987	up
WBGene00016734	C46H11.10	590	503	511	1632	1556	1387	12.8956	9.55663	9.15662	31.1315	27.8471	25.2709	3.88617e-18	1.14302	up
WBGene00007363	stdh-1	526	658	553	2001	1969	1353	13.1626	14.4415	11.5382	43.7575	40.4381	28.3119	4.27203e-18	1.25064	up
WBGene00010407	scb-1	190	162	142	566	822	705	6.85428	5.26357	4.27492	18.0351	24.9318	21.8332	4.82723e-18	1.67966	up
WBGene00022814	ZK742.4	883	699	715	2174	2022	2351	17.4092	12.0736	11.7341	37.4088	32.6917	38.72	4.83412e-18	1.1393	up
WBGene00017044	mrpl-18	1252	1426	1495	996	765	869	54.8003	54.6971	54.491	38.0237	27.4114	31.7632	5.19486e-18	-1.00063	down
Caenorhabditis_elegans_newGene_293	-	10	26	21	193	198	221	0.167071	0.38717	0.301474	2.94511	2.846	3.22576	5.32668e-18	2.87204	up
WBGene00045078	C46C2.7	465	585	544	220	275	274	26.2148	28.8878	25.5061	10.8004	12.6971	12.8573	5.96037e-18	-1.37717	down
WBGene00010408	mboa-2	1316	993	1283	3379	3459	2752	20.3571	13.4524	16.5157	45.6531	43.9014	35.5844	6.69159e-18	1.05181	up
WBGene00000211	asm-1	233	245	298	809	847	714	3.52152	3.24486	3.74031	10.6822	10.5049	9.02084	6.83697e-18	1.25098	up
WBGene00006572	tin-9.1	820	1071	896	218	379	472	66.6175	76.2094	60.6164	15.4281	25.1977	32.036	7.32428e-18	-1.69261	down
WBGene00010877	lact-4	490	437	494	1592	1593	1138	10.372	8.10626	8.69404	29.4031	27.6235	20.1158	7.48491e-18	1.23701	up
WBGene00021371	nape-1	348	334	443	968	1074	1099	8.34669	7.02046	8.86439	20.2885	21.1482	22.0521	7.69631e-18	1.12554	up
WBGene00008292	C54C8.4	292	320	466	130	134	95	6.41922	6.15249	8.53755	2.4801	2.40293	1.72877	7.902e-18	-1.86688	down
WBGene00018204	F39F10.4	87	107	159	507	500	499	3.1797	3.44478	4.83844	16.2541	15.0637	15.3083	8.08631e-18	1.7186	up
WBGene00018138	folt-2	685	784	746	319	359	454	11.5546	11.5862	10.4705	4.69675	4.96562	6.39727	8.60468e-18	-1.29894	down
WBGene00045275	F18E3.12	71	105	87	400	528	368	4.83102	6.30991	4.96061	23.9761	29.7423	21.1302	8.89366e-18	1.89645	up
WBGene00185092	K08D8.7	96	102	120	467	501	385	2.83791	2.64422	2.95028	12.0848	12.1795	9.53765	9.73747e-18	1.70262	up
WBGene00011017	R04F11.5	833	984	791	476	514	393	35.3637	36.6447	27.9778	17.6301	17.8825	13.9218	1.07753e-17	-1.25282	down
WBGene00011705	clp-9	238	301	302	772	932	793	3.00683	3.19481	3.25447	8.6502	9.76339	8.69404	1.25635e-17	1.21065	up
WBGene00016883	C52E2.4	169	183	133	700	635	585	2.0742	2.13476	1.36299	8.14307	6.92702	6.01222	1.48764e-17	1.59449	up
WBGene00014099	ZK836.3	76	166	77	568	655	566	3.4857	6.67637	2.91912	22.7359	24.6638	21.6836	1.50003e-17	2.06365	up
WBGene00002246	lag-2	499	647	826	254	339	326	11.4564	13.0159	15.8037	5.07911	6.3877	6.25703	1.60787e-17	-1.41293	down
WBGene00000008	aat-7	22	17	27	219	169	264	0.402813	0.271628	0.414642	3.53347	2.55581	4.06994	1.63262e-17	2.76347	up
WBGene00018708	oac-32	165	182	213	638	623	583	2.13485	2.0505	2.35026	7.21672	6.62849	6.27766	1.63309e-17	1.35581	up
WBGene00000539	cln-3.1	331	301	320	37	102	84	6.35294	5.0443	5.10962	0.611849	1.63295	1.34204	1.67434e-17	-2.34039	down
WBGene00007691	cest-8	11	39	63	361	383	321	0.162887	0.516002	0.795164	4.84723	4.82751	4.11891	1.72422e-17	2.73669	up
WBGene00020704	-	389	608	684	169	224	259	6.99712	9.58169	10.2402	2.6506	3.30199	3.89366	1.8231e-17	-1.65951	down
WBGene00022024	Y64H9A.2	498	604	656	326	280	230	22.6773	24.1093	24.8829	12.9288	10.4544	8.74586	1.82813e-17	-1.39032	down
WBGene00010334	del-5	330	372	307	896	1073	1034	5.58158	5.51731	4.32661	13.2433	14.8989	14.6302	1.96299e-17	1.20485	up
WBGene00086568	Y2H9A.6	0	0	3	151	181	47	0	0	0.064165	4.02371	4.5366	1.20041	2.23786e-17	4.64969	up
WBGene00012960	Y47H10A.4	514	458	476	177	173	243	11.5166	8.98097	8.88365	3.4443	3.16123	4.54597	2.52074e-17	-1.60715	down
Caenorhabditis_elegans_newGene_536	-	71	73	139	488	567	407	2.63141	2.39538	4.33105	15.9625	17.4211	12.7387	2.62345e-17	1.97055	up
WBGene00006573	tin-10	637	831	840	273	425	419	45.6308	50.2938	49.1885	17.0028	24.7101	24.4797	3.14292e-17	-1.36929	down
WBGene00020912	W01A11.7	539	561	782	1624	1707	1474	21.5451	19.3393	25.9772	56.6741	55.8571	49.2775	3.52687e-17	1.00448	up
WBGene00001079	dpy-20	729	860	1154	542	502	430	11.6842	12.0868	15.4057	7.57645	6.5907	5.75774	3.81962e-17	-1.21496	down
WBGene00020219	T05A7.1	58	66	78	279	520	374	1.90973	1.88803	2.13235	8.05255	14.109	10.3312	4.82807e-17	2.10586	up
WBGene00012810	nceh-1	38	79	54	360	309	359	0.775822	1.4467	0.916043	6.55643	5.30316	6.2535	5.01512e-17	2.15879	up
WBGene00010004	F53H2.1	10	10	7	140	155	136	0.094861	0.085884	0.057678	1.52206	1.29968	1.40577	5.03577e-17	3.26672	up
WBGene00022371	set-29	793	936	1136	585	637	526	17.1631	17.7506	20.4785	11.0558	11.294	9.49947	5.45586e-17	-1.04266	down
WBGene00009608	nhr-265	174	246	309	47	74	66	4.59313	5.7183	6.82394	1.07245	1.60236	1.44357	6.00033e-17	-2.19904	down
WBGene00008052	ctns-1	551	530	493	1484	1440	1289	11.4092	9.63565	8.50852	26.7994	24.2773	22.2749	6.09241e-17	1.0552	up
WBGene00005647	srp-6	411	489	583	1280	1434	1150	8.71969	9.11108	10.3213	23.7461	24.9895	20.4216	6.14508e-17	1.03147	up
Caenorhabditis_elegans_newGene_728	-	24	61	35	308	330	261	0.315676	0.70943	0.375951	3.59297	3.59445	2.92427	6.60999e-17	2.43045	up
WBGene00003037	lin-54	829	905	836	555	505	500	15.1868	14.4972	12.6903	8.82375	7.57569	7.6522	7.76821e-17	-1.06025	down
WBGene00012635	Y38H8A.1	313	397	548	130	163	179	8.63539	9.59057	12.6013	3.11402	3.68812	4.11139	8.213e-17	-1.70248	down
WBGene00016129	C26B2.7	728	789	752	403	481	463	32.3347	30.7277	27.7858	15.58	17.5066	17.2027	8.77554e-17	-1.09259	down
WBGene00003646	nhr-56	227	265	262	710	750	731	4.34883	4.45492	4.18011	11.9562	11.8708	11.8823	9.10296e-17	1.1784	up
WBGene00018422	F44E2.9	547	532	594	219	318	279	31.4071	26.7323	28.3869	10.9254	14.94	13.3509	9.30168e-17	-1.36564	down
WBGene00007855	C31H5.4	58	60	85	299	347	378	4.8194	4.41245	5.95748	21.9608	23.8911	26.5592	1.17793e-16	1.92869	up
WBGene00007421	C07H4.1	140	147	155	533	589	467	5.71436	5.25586	5.24427	19.3643	19.8914	16.1267	1.31184e-16	1.46899	up
WBGene00010893	cutl-9	495	557	640	316	235	281	7.57532	7.46972	8.1599	4.2145	2.94373	3.59272	1.36724e-16	-1.34241	down
WBGene00021743	Y50D4B.4	1188	1126	1238	691	701	855	13.5616	11.4671	12.3149	6.80024	6.78557	8.54781	1.42741e-16	-1.00233	down
WBGene00012959	Y47H10A.3	4	9	3	122	178	101	0.081012	0.198349	0.044687	2.8272	3.8663	2.23504	1.61589e-16	3.67341	up
WBGene00009131	F25H8.1	667	682	786	444	390	423	16.9896	15.3391	16.6719	9.92681	8.14533	9.0198	1.66839e-16	-1.09744	down
WBGene00012540	Y37A1B.7	580	972	1060	430	436	440	25.0552	36.7907	38.124	16.1938	15.4391	15.8835	1.7653e-16	-1.30914	down
WBGene00016507	abhd-5.2	319	310	344	997	955	819	6.11896	5.21251	5.52947	16.7368	15.0119	13.1143	1.87018e-16	1.14774	up
WBGene00018159	F37F2.2	920	916	936	485	580	621	50.686	44.231	42.9545	23.2726	26.2114	28.5214	1.88389e-16	-1.05931	down
WBGene00044471	F56D6.9	0	0	0	106	101	51	0	0	0	10.9251	9.76438	5.01225	2.11708e-16	4.80605	up
WBGene00011158	chil-16	0	0	0	54	108	90	0	0	0	0.968091	1.82721	1.54228	2.62009e-16	4.7903	up
WBGene00000983	dhs-20	333	292	350	825	1071	966	6.34575	4.87267	5.54956	13.7129	16.7306	15.3673	2.68473e-16	1.186	up
WBGene00015220	B0507.3	237	333	292	793	908	816	4.65515	5.76122	4.91092	13.3319	14.4882	13.2454	2.76982e-16	1.18632	up
WBGene00007368	C06B8.2	132	107	184	488	629	581	2.62893	1.87295	3.13089	8.65829	10.3566	9.38582	3.00452e-16	1.62277	up
WBGene00001778	gst-30	32	35	21	226	228	228	1.22779	1.17461	0.659522	7.61916	7.21901	7.36494	3.00459e-16	2.4501	up
WBGene00189958	F45H11.8	614	685	716	368	289	400	58.6344	57.2728	56.9175	30.6658	22.6232	31.8739	3.05162e-16	-1.25646	down
WBGene00017738	tipn-1	440	438	601	239	255	232	13.8157	12.041	15.7193	6.54359	6.5697	6.0762	3.20426e-16	-1.34578	down
WBGene00018466	F45E1.5	207	260	280	712	785	692	2.7992	3.07882	3.14547	8.3997	8.69433	7.80565	3.22185e-16	1.19365	up
WBGene00021796	Y52E8A.3	263	297	302	807	815	762	12.6087	12.4444	12.0514	33.887	32.194	30.6215	3.25013e-16	1.109	up
WBGene00010795	M01A8.1	105	154	86	501	595	486	3.00032	3.91791	2.03917	13.2355	14.3418	12.2822	3.52441e-16	1.78815	up
WBGene00004798	sip-1	14	44	55	266	449	276	0.603662	1.63953	1.96462	10.0588	15.9556	9.97958	3.85263e-16	2.6266	up
WBGene00011190	swt-6	31	31	17	222	194	306	1.0059	0.935399	0.474308	6.89681	5.64131	9.07431	4.27697e-16	2.64172	up
WBGene00002200	kin-16	709	597	607	1700	1734	1569	11.9053	8.73456	8.60653	24.8788	24.1422	22.2129	5.01464e-16	1.01897	up
WBGene00020554	T19A5.3	1860	3002	3429	1831	1669	1529	20.4064	28.8266	31.4003	17.5506	14.9911	13.9872	5.29009e-16	-1.03847	down
WBGene00009636	F42F12.4	250	347	345	909	899	827	11.2172	13.5253	12.9491	35.7868	33.3921	31.2679	5.36768e-16	1.13069	up
WBGene00016728	C46H11.2	385	542	634	1311	1417	1316	7.81249	9.65461	10.7324	23.2555	23.6087	22.3444	6.74148e-16	1.02858	up
WBGene00012776	Y42A5A.1	837	626	817	1910	2138	1879	6.66448	4.37035	5.41682	13.2788	13.966	12.5069	6.95778e-16	1.01304	up
WBGene00000882	cyn-6	3117	4576	5318	1474	1814	2037	122.222	157.179	173.619	50.3928	58.3839	66.7366	7.27862e-16	-1.58334	down
WBGene00020276	T05H4.15	146	132	150	513	744	474	3.03741	2.38524	2.59493	9.36758	12.7434	8.27492	8.11302e-16	1.62048	up
WBGene00020153	nhr-212	184	141	88	705	680	650	3.91882	2.64407	1.57193	13.2068	11.969	11.6603	8.2438e-16	1.86323	up
WBGene00017567	F18E3.11	225	397	392	916	1397	1118	15.4631	23.8932	22.4155	54.9568	78.7474	64.2272	9.35672e-16	1.3971	up
WBGene00020047	ttr-32	75	63	92	343	402	326	3.5106	2.59935	3.57982	14.1153	15.5356	12.8212	9.39966e-16	1.81464	up
WBGene00015225	B0507.8	2	9	13	655	1099	323	0.042182	0.157799	0.219468	12.4496	19.6091	5.87506	9.64683e-16	4.49207	up
WBGene00008810	cyp-13A12	62	97	129	431	475	392	0.994638	1.36848	1.72223	6.07016	6.27558	5.2819	1.03041e-15	1.78717	up
WBGene00017360	F10E9.11	452	518	534	262	296	239	24.0619	24.214	23.6922	12.1512	12.9362	10.6408	1.05377e-15	-1.24482	down
WBGene00005582	sri-70	230	263	292	95	63	94	6.52178	6.53842	6.89414	2.33243	1.45971	2.20846	1.18958e-15	-1.91054	down
WBGene00015286	best-3	289	349	329	842	1002	823	4.04738	4.28485	3.8376	10.2925	11.5107	9.63299	1.24298e-15	1.103	up
WBGene00016762	ugt-24	277	306	192	1002	1010	814	4.68656	4.45146	2.6806	14.8457	14.0748	11.4623	1.28445e-15	1.47388	up
WBGene00013268	tric-1B.2	886	867	1070	484	461	646	17.1045	14.6688	17.1982	8.15238	7.28645	10.4057	1.2864e-15	-1.15686	down
WBGene00018262	cyp-33C3	377	218	281	1015	1275	1005	5.84223	2.96122	3.62536	13.7501	16.2206	13.0272	1.32875e-15	1.50963	up
WBGene00020855	hpo-36	853	1180	1561	628	602	737	8.7093	10.5939	13.3725	5.64447	5.10056	6.2533	1.41747e-15	-1.18184	down
WBGene00018614	pals-31	0	6	11	165	202	86	0	0.185924	0.375522	5.94843	6.84817	2.978	1.42685e-15	3.71698	up
WBGene00044761	pals-19	179	181	255	630	635	703	5.21749	4.60343	6.13938	15.9873	15.1734	17.0766	1.46845e-15	1.31687	up
WBGene00007616	rpoa-12	554	788	695	293	401	377	30.1302	38.0284	31.8428	13.2557	17.4777	17.3474	1.61365e-15	-1.25358	down
WBGene00006952	wrt-6	702	910	1109	505	598	456	10.0004	11.355	13.1544	6.26839	6.97467	5.42266	1.6718e-15	-1.12651	down
WBGene00014092	ZK822.5	719	666	779	2061	1975	1515	10.8295	8.78943	10.1623	27.1617	24.4778	19.0625	1.68621e-15	1.00012	up
Caenorhabditis_elegans_newGene_1303	-	358	419	348	1019	1052	963	7.78058	6.96675	5.52913	17.2057	16.635	15.6863	1.73059e-15	1.06834	up
WBGene00013484	Y69H2.9	50	94	93	375	399	348	0.831396	1.38479	1.29954	5.53845	5.53996	4.9164	1.75873e-15	1.84753	up
WBGene00011839	T19C4.5	318	384	490	1063	1193	974	7.36485	7.81607	9.48302	21.5774	22.7711	18.9221	1.84462e-15	1.08801	up
WBGene00021978	Y58A7A.4	20	56	38	257	282	268	0.197247	0.489069	0.314183	2.25264	2.32293	2.25452	2.11691e-15	2.35324	up
WBGene00077775	nlp-58	306	371	390	929	993	856	14.4121	15.2955	15.2757	38.175	38.3357	33.6771	2.16328e-15	1.02654	up
WBGene00020995	W03F8.6	122	157	180	608	583	460	6.22844	5.91024	6.70688	25.5451	23.2983	18.8105	2.36047e-15	1.47697	up
WBGene00005602	srj-14	46	76	71	283	352	325	1.18662	1.74047	1.54311	6.48418	7.58761	7.14105	2.44867e-15	1.90541	up
WBGene00004498	rps-29	4873	6878	6287	2019	2961	2948	382.579	473.202	411.033	138.292	190.522	193.269	2.46171e-15	-1.49749	down
WBGene00012091	pals-29	0	0	0	67	112	55	0	0	0	1.28603	2.0167	1.00378	2.49503e-15	4.67176	up
WBGene00003692	nhr-102	252	254	293	722	756	739	5.11911	4.52216	4.95486	12.7979	12.5957	12.5425	2.52049e-15	1.11257	up
WBGene00016219	pals-24	148	299	265	846	1068	740	4.53446	8.01281	6.76072	22.6387	26.8355	18.937	2.63419e-15	1.52904	up
WBGene00015710	C12D5.9	424	424	434	173	225	217	10.0345	8.80621	8.5573	3.57234	4.37066	4.28289	2.95505e-15	-1.38669	down
WBGene00010072	F54F12.1	15	28	27	189	253	163	0.10043	0.163593	0.14972	1.10651	1.39576	0.916612	2.96987e-15	2.58418	up
WBGene00015693	ugt-28	185	188	223	641	579	621	2.96325	2.6354	2.96767	8.95251	7.59837	8.30959	3.06924e-15	1.2635	up
WBGene00022488	orc-3	614	725	712	387	455	423	8.94808	9.28992	8.67547	4.92818	5.44754	5.16143	3.56492e-15	-1.03372	down
WBGene00017331	ugt-40	189	200	211	681	740	537	3.03494	2.80772	2.82469	9.54421	9.74524	7.21003	3.6473e-15	1.33436	up
WBGene00017332	ugt-37	57	68	86	322	334	306	0.914205	0.95924	1.14826	4.53944	4.42206	4.12674	4.00037e-15	1.79161	up
WBGene00044206	T26H5.9	12	7	6	107	162	140	0.935795	0.438573	0.377225	7.32609	10.4785	9.21259	4.04341e-15	3.23673	up
Caenorhabditis_elegans_newGene_2009	-	21	4	4	207	196	149	0.264224	0.061005	0.032648	2.81887	2.26347	2.02141	4.25958e-15	3.36365	up
WBGene00000220	atf-2	741	1087	1345	640	570	538	14.6243	18.8156	22.113	11.0172	9.22415	8.87511	4.31852e-15	-1.17266	down
WBGene00021213	Y18H1A.9	748	890	1196	606	492	509	11.4913	11.9821	15.3	8.12656	6.19393	6.52379	4.36473e-15	-1.13645	down
WBGene00019961	R08E5.1	45	27	24	212	255	273	1.10929	0.580549	0.483775	4.6834	5.25301	5.70082	4.66483e-15	2.42185	up
WBGene00000236	bag-1	751	687	770	448	479	425	29.1085	23.3214	24.828	15.123	15.2179	13.7458	4.97899e-15	-1.04868	down
WBGene00013950	txt-8	540	527	428	1361	1393	1322	14.1123	12.0849	9.31468	31.0606	29.8753	28.8824	5.04233e-15	1.07549	up
WBGene00019593	K09F6.10	268	275	353	831	870	762	3.04007	2.83215	3.36438	8.98649	8.87477	7.86381	5.44346e-15	1.10282	up
WBGene00006520	egli-1	506	624	641	276	306	372	15.2841	16.5193	16.1357	7.26812	7.56646	9.37626	5.46567e-15	-1.21761	down
WBGene00008302	pals-38	26	27	14	249	337	138	0.533159	0.481851	0.241615	4.50678	5.73155	2.37809	5.58776e-15	2.80901	up
WBGene00013852	hhat-1	893	1530	1635	834	605	654	14.7037	22.0753	22.4153	11.9777	8.15625	8.98422	5.84654e-15	-1.26097	down
WBGene00019589	K09F6.6	126	95	118	468	469	409	1.90395	1.26084	1.48784	6.21888	5.84366	5.197	6.01894e-15	1.59407	up
WBGene00011539	fbxa-135	12	26	16	252	330	109	0.169546	0.326937	0.193804	3.26937	4.02397	1.34924	6.05135e-15	3.00589	up
WBGene00008859	F15D4.2	338	351	449	962	1111	914	15.1778	13.7985	16.7816	37.7415	40.9515	34.3307	7.06998e-15	1.0377	up
WBGene00011894	ttr-23	257	369	280	930	831	929	13.7143	17.1979	12.3415	39.4385	32.9103	38.9524	7.29486e-15	1.20715	up
WBGene00044661	fbxa-143	32	13	11	235	222	178	0.751789	0.260609	0.214534	4.85565	4.31088	3.50882	7.56173e-15	2.84902	up
WBGene00007068	cTel55X.1	368	505	716	1347	1622	1532	13.2955	15.986	21.5685	42.5023	48.0819	46.2922	7.62028e-15	1.15759	up
WBGene00022415	Y102A11A.5	1039	1818	1908	933	941	909	49.9342	76.5753	76.3973	39.1464	37.0547	36.4763	8.55118e-15	-1.09155	down
WBGene00007546	nhr-153	162	169	216	558	779	548	3.18989	2.90684	3.53436	9.59475	12.5832	9.02192	8.69134e-15	1.41106	up
WBGene00021112	W09C3.4	618	831	902	505	455	462	15.8401	18.6811	19.2762	11.2891	9.561	9.89721	9.05271e-15	-1.05049	down
WBGene00004129	pqn-42	341	334	387	889	1119	873	5.70737	4.92469	5.4196	12.9093	15.2873	12.1556	9.1822e-15	1.07758	up
WBGene00013949	ZK262.2	276	329	360	890	836	813	6.60971	6.91173	7.18169	18.6159	16.4276	16.2793	9.18457e-15	1.0427	up
WBGene00013845	fbxa-37	114	120	166	518	459	463	3.21472	2.97553	3.91631	12.8516	10.6861	10.9912	9.35191e-15	1.4771	up
WBGene00015578	C07G3.10	108	75	98	522	455	343	4.19615	2.54745	3.16849	17.7781	14.5643	11.1765	9.62645e-15	1.81445	up
WBGene00019461	K07A3.3	13	13	12	114	163	167	0.220535	0.196589	0.167169	1.76136	2.35824	2.47253	1.01934e-14	2.89827	up
WBGene00015273	mct-2	533	683	638	281	404	295	9.34463	10.272	9.03728	4.84936	5.66625	4.22629	1.03068e-14	-1.24817	down
WBGene00017443	F13H8.11	217	235	254	599	730	764	3.49777	3.32142	3.41186	8.44221	9.67407	10.304	1.03314e-14	1.2032	up
WBGene00000030	abu-7	233	444	423	116	119	151	4.90904	8.20304	7.42117	2.1319	2.05342	2.64415	1.08892e-14	-1.78107	down
WBGene00016150	hint-3	333	343	290	855	1003	886	11.8869	10.6312	8.58575	26.6281	29.3406	26.2847	1.20227e-14	1.13471	up
WBGene00044289	Y37F4.8	100	139	101	463	398	523	4.50929	5.52943	3.80488	18.3749	14.8276	19.8356	1.43363e-14	1.63305	up
WBGene00012460	dhps-1	634	700	796	337	417	474	14.2263	13.77	14.8771	6.60439	7.67605	8.89078	1.49974e-14	-1.12463	down
WBGene00009642	F42G4.5	868	787	1083	411	446	614	24.1782	19.2251	25.147	10.3055	10.1607	14.284	1.50164e-14	-1.22179	down
WBGene00015063	B0228.6	248	182	197	765	809	624	7.78896	5.00911	5.14592	21.0127	20.8807	16.407	1.60411e-14	1.41837	up
WBGene00007835	oac-7	35	66	63	373	282	265	0.426055	0.71436	0.652547	4.04586	2.86892	2.75428	1.70562e-14	2.06149	up
WBGene00007275	C03D6.1	468	373	365	153	194	160	14.6694	10.2644	9.54428	4.17049	4.97716	4.18653	1.78326e-14	-1.57422	down
WBGene00000465	cpg-1	56	45	50	243	279	281	0.823561	0.568287	0.611735	3.11875	3.35685	3.45247	1.97542e-14	1.97241	up
WBGene00010520	cpx-2	391	365	432	900	1112	1073	20.2736	16.5423	18.6466	40.6981	47.2512	46.4315	2.00718e-14	1.01601	up
WBGene00235352	ZK250.13	271	479	298	1272	1042	1144	3.41713	5.57445	3.34448	13.9701	11.0008	11.9279	2.0256e-14	1.35341	up
WBGene00004099	abu-15	352	690	616	161	246	245	7.8896	13.5682	11.5065	3.1427	4.52064	4.58582	2.14556e-14	-1.63392	down
WBGene00015758	nhr-155	192	162	196	729	552	598	4.66727	3.46121	3.97625	15.5218	11.0316	12.1903	2.25605e-14	1.39545	up
WBGene00020052	R13A5.10	556	614	676	339	372	405	27.5207	26.6198	27.8889	14.65	15.0939	16.7212	2.56954e-14	-1.05883	down
WBGene00015056	B0222.5	222	189	209	616	622	723	4.05169	3.02281	3.17358	9.81132	9.30771	11.0171	2.68071e-14	1.28573	up
WBGene00009839	fbxa-188	32	20	26	258	266	145	0.807713	0.432862	0.550133	5.76101	5.57933	3.09229	2.73657e-14	2.5464	up
WBGene00003080	lsm-6	531	620	655	243	371	343	41.5488	42.5161	42.6991	16.5529	23.7624	22.3737	2.91245e-14	-1.24315	down
WBGene00017618	F20A1.6	307	294	332	738	904	947	15.8856	13.4094	13.9583	33.8614	36.0739	37.5923	3.00149e-14	1.10808	up
WBGene00007134	pals-28	3	2	0	61	129	86	0.065414	0.030728	0	1.15442	2.31618	1.5735	3.14151e-14	4.04452	up
WBGene00014111	rpc-25	853	910	768	527	532	518	28.8173	26.964	21.6065	15.5285	14.7404	14.6026	3.28607e-14	-1.02645	down
WBGene00015476	C05D9.9	138	159	139	544	527	439	4.97751	5.01491	4.1689	17.8066	15.9812	13.2962	3.57733e-14	1.41243	up
WBGene00003693	nhr-103	187	218	196	590	648	570	4.38286	4.46367	3.81346	12.0692	12.4579	11.1482	3.74361e-14	1.22023	up
WBGene00021931	znf-782	819	1185	1238	665	613	745	11.3186	14.3582	14.2694	8.02731	6.94345	8.61613	3.7986e-14	-1.00464	down
WBGene00194869	K01A6.8	4	6	12	90	185	119	0.255616	0.421026	0.801765	6.37997	12.3784	8.13993	4.05737e-14	3.31207	up
WBGene00011798	T16G1.4	23	84	95	1223	1294	1080	0.4419	1.45117	1.56644	21.1567	21.016	17.8772	4.39015e-14	3.33658	up
WBGene00019885	R05D8.7	143	153	177	446	544	569	4.22739	3.97133	4.35867	11.5534	13.2261	14.1033	4.62568e-14	1.34906	up
WBGene00011424	dhs-31	83	35	48	311	420	341	2.41673	0.876644	1.14857	7.9448	10.0735	8.32657	4.97212e-14	2.19303	up
WBGene00016517	nhr-260	115	120	179	476	490	479	2.66645	2.4261	3.44739	9.62639	9.31143	9.27595	5.7871e-14	1.43424	up
WBGene00007185	nlp-36	1392	1846	1654	712	1110	1134	109.287	126.993	108.103	48.7441	71.416	74.3026	6.39988e-14	-1.06173	down
WBGene00016796	cec-2	260	282	276	678	761	835	2.70701	2.52192	2.28569	6.04322	6.33465	7.39044	6.52903e-14	1.11111	up
WBGene00020396	T10B5.10	617	786	906	515	443	396	13.6379	15.2417	16.6963	9.92541	8.02265	7.30831	6.56779e-14	-1.09244	down
WBGene00021157	Y4C6B.3	162	97	222	686	705	586	2.81943	1.47325	3.46248	11.1781	10.2744	8.8348	6.64046e-14	1.64765	up
WBGene00044746	C53H9.3	336	408	365	147	174	195	28.9374	30.8038	26.0927	10.7406	12.176	13.984	6.94763e-14	-1.42139	down
WBGene00018966	F56D2.5	120	128	143	388	493	480	1.89859	1.77526	1.88703	5.3563	6.39185	6.3453	7.25766e-14	1.42107	up
WBGene00018256	cutl-28	291	378	467	128	164	189	3.5229	4.00987	4.70683	1.35355	1.62256	1.90932	7.59482e-14	-1.53554	down
WBGene00009809	F47B8.8	69	115	121	500	353	442	2.45526	3.57878	3.57763	15.5902	10.349	13.1866	8.91141e-14	1.7013	up
Caenorhabditis_elegans_newGene_76	-	0	3	0	89	84	62	0	0.026163	0	0.835862	0.739966	0.554511	1.03868e-13	4.13825	up
WBGene00007669	C18D1.2	18	41	19	231	172	244	0.335778	0.684821	0.300087	3.89653	2.71798	3.93922	1.05867e-13	2.51384	up
WBGene00013748	ssu-1	180	149	237	627	693	552	4.0197	2.92857	4.41061	12.2725	12.7283	10.3377	1.08463e-13	1.35436	up
WBGene00007932	zip-5	229	267	280	897	886	610	7.37946	7.42284	7.37301	25.2256	23.2926	16.3188	1.14147e-13	1.25811	up
WBGene00011707	T11B7.2	301	389	392	158	177	188	29.3498	33.2395	31.7964	13.3635	14.1124	15.2348	1.26707e-13	-1.36311	down
WBGene00004183	prk-2	535	672	647	267	371	384	8.69745	9.56949	8.76721	3.79058	4.94762	5.21589	1.27201e-13	-1.18728	down
WBGene00004984	spn-4	346	390	439	172	222	200	6.28134	6.21637	6.60217	2.70292	3.28511	3.01127	1.3018e-13	-1.30465	down
WBGene00006440	tag-63	640	593	733	373	331	428	8.38761	6.81109	8.0052	4.26002	3.55477	4.68629	1.32863e-13	-1.1268	down
WBGene00010771	K11D2.5	571	601	710	361	435	357	12.3054	11.3486	12.7579	6.79374	7.69302	6.41999	1.34229e-13	-1.04038	down
WBGene00020449	fbxa-54	164	160	206	515	535	620	3.80434	3.25428	3.98668	10.4641	10.2109	12.067	1.37717e-13	1.28839	up
WBGene00010630	ttll-15	257	310	387	844	1159	797	4.09231	4.32174	5.13335	11.7361	15.1293	10.5978	1.46406e-13	1.19383	up
WBGene00010439	JC8.7	724	784	687	474	468	419	16.4507	15.9906	13.1026	9.79158	8.72097	7.96401	1.4884e-13	-1.03081	down
WBGene00008401	D2005.6	504	591	685	319	399	340	8.02934	8.24854	9.0801	4.42801	5.20376	4.5218	1.61026e-13	-1.07918	down
WBGene00001539	gcy-13	13	9	16	144	139	126	0.113447	0.071005	0.117774	1.12847	1.01901	0.945457	1.65838e-13	2.79246	up
WBGene00007362	cyp-35C1	160	237	244	74	62	73	2.8893	3.74763	3.6788	1.15763	0.906721	1.08901	1.68903e-13	-1.87479	down
WBGene00019654	cest-28	112	126	109	431	436	382	1.83927	1.8096	1.49215	6.19969	5.88253	5.25698	1.69209e-13	1.46165	up
WBGene00018261	cyp-33C5	72	90	108	303	412	377	1.28783	1.41745	1.66019	4.7674	6.36745	5.67191	1.93518e-13	1.62589	up
WBGene00009485	F36G9.3	71	115	158	486	415	509	1.26958	1.81133	2.36902	7.64644	6.14376	7.68087	1.96114e-13	1.65905	up
WBGene00007507	C10C5.3	30	39	36	205	254	182	0.58714	0.668757	0.584406	3.55655	4.14551	3.03293	2.03783e-13	2.14379	up
WBGene00000798	crn-5	740	833	932	486	632	445	27.5089	27.1332	28.8543	15.7727	19.2447	13.8237	2.36561e-13	-1.015	down
WBGene00020049	ttr-8	254	309	240	815	817	697	14.8505	15.8339	11.7097	41.6924	39.2333	34.0854	2.40202e-13	1.16656	up
WBGene00006310	sul-3	186	160	197	517	651	547	2.48061	1.86729	2.19171	6.03942	7.1391	6.10535	2.54352e-13	1.28322	up
WBGene00011293	R102.6	120	92	113	376	474	398	2.87368	1.91293	2.24656	7.86677	9.31367	7.963	2.60944e-13	1.54273	up
WBGene00016425	C34H4.2	156	177	232	570	596	540	2.84336	2.82235	3.52097	9.07032	8.90949	8.22564	2.73577e-13	1.23422	up
WBGene00015272	C01B4.8	80	68	114	343	364	369	1.53866	1.29372	1.82853	5.75989	5.93443	6.12577	2.97011e-13	1.64552	up
WBGene00023068	rpl-41.2	15074	22034	19704	7110	9947	10167	1459.83	1869.9	1589.16	600.839	789.528	822.3	3.13709e-13	-1.37472	down
WBGene00195063	coa-1	790	753	719	396	476	504	40.8136	35.1834	32.074	17.7651	20.9138	23.3215	4.31857e-13	-1.06036	down
WBGene00017961	nhr-180	127	146	206	484	535	536	2.84963	2.88386	3.8493	9.50315	9.87853	10.0906	4.41964e-13	1.33507	up
WBGene00012483	coa-5	616	621	611	375	414	355	31.8478	28.1659	26.2936	16.9338	17.5588	15.3278	4.79163e-13	-1.03242	down
WBGene00011056	R06B9.5	57	125	81	356	392	473	5.60835	10.9356	6.69574	31.0067	32.1082	39.4674	4.81159e-13	1.8056	up
WBGene00019744	M02H5.8	170	165	179	485	546	531	10.8482	9.25117	9.56663	27.4239	28.6397	28.477	4.83103e-13	1.23176	up
WBGene00021220	Y19D10A.5	65	67	112	322	351	359	1.22779	1.12738	1.78805	5.41121	5.54743	5.79008	5.48007e-13	1.68828	up
WBGene00008515	F02C12.1	371	316	487	1203	1096	942	3.9809	2.97169	4.35612	11.2773	9.64875	8.45431	5.57171e-13	1.10734	up
WBGene00001779	gst-31	97	55	101	359	359	455	4.10078	2.04784	3.57132	13.3641	12.5301	16.1891	5.59459e-13	1.792	up
Caenorhabditis_elegans_newGene_1705	-	0	0	0	67	60	52	0	0	0	1.27676	1.02279	0.905365	6.00079e-13	4.3423	up
WBGene00012492	fbxb-7	12	14	8	147	105	146	0.298321	0.317306	0.168238	3.33864	2.24047	3.18013	6.02175e-13	2.86061	up
WBGene00007449	C08F8.9	187	201	185	63	68	64	19.7055	18.6138	16.2154	5.73638	5.88164	5.6401	6.31922e-13	-1.83238	down
WBGene00006163	str-112	20	37	7	253	220	185	0.502775	0.811752	0.136653	5.61148	4.58498	3.92577	6.52823e-13	2.72107	up
WBGene00004380	rnf-1	63	69	110	345	423	296	1.27998	1.23106	1.8651	6.17104	7.11171	5.0568	7.01075e-13	1.7368	up
WBGene00004456	rpl-43	17716	24735	22979	8879	12206	12786	1409.44	1773.01	1565.91	631.182	815.415	871.186	7.40179e-13	-1.26925	down
WBGene00016364	nhr-161	144	105	113	505	400	507	3.68114	2.35376	2.2964	11.3097	8.41025	10.8027	7.9016e-13	1.56009	up
WBGene00016862	cest-32	358	570	457	1187	1224	1131	5.78635	8.07093	6.143	16.7374	16.2183	15.2659	8.03041e-13	1.00105	up
WBGene00004490	rps-21	12804	17421	15905	5873	8584	8600	1040.58	1240.65	1076.42	416.433	571.798	583.69	8.09535e-13	-1.31909	down
WBGene00007680	maa-1	172	113	178	501	602	535	5.18617	2.99488	4.46127	13.2137	14.9092	13.5056	8.22777e-13	1.43395	up
WBGene00023485	ttr-49	192	191	155	634	607	518	7.74025	6.75	5.19743	22.3445	20.0841	17.475	9.73436e-13	1.32416	up
WBGene00269434	sqst-5	152	152	148	427	531	502	6.52992	5.71578	5.30723	16.0203	18.7501	18.0453	9.86216e-13	1.31143	up
WBGene00003700	nhr-110	151	160	219	506	578	527	2.86098	2.65315	3.44682	8.4295	9.19962	8.48285	1.20228e-12	1.24066	up
WBGene00007131	pals-26	28	14	8	481	658	305	0.453715	0.203781	0.104902	7.01146	9.01254	4.24922	1.2296e-12	3.60498	up
WBGene00004497	rps-28	5393	7274	6787	2788	3965	3911	563.484	666.012	590.522	254.194	339.57	341.248	1.27179e-12	-1.1922	down
WBGene00001950	hlh-3	419	473	485	178	265	265	14.2075	14.0413	13.6899	5.26212	7.34909	7.48272	1.28286e-12	-1.28324	down
WBGene00016147	cyp-32A1	23	54	93	722	665	730	0.369444	0.772265	1.25944	10.3479	8.95326	10.0069	1.41617e-12	2.95203	up
WBGene00004787	sft-1	623	866	663	427	400	453	16.52	20.2478	14.6931	10.0288	8.88891	10.2184	1.4625e-12	-1.08143	down
WBGene00007807	C29F3.7	608	686	875	449	506	393	9.82873	9.80875	11.7795	6.35231	6.70431	5.3001	1.47891e-12	-1.01367	down
WBGene00001723	grl-14	22	34	52	188	248	226	0.401911	0.541476	0.775323	2.98752	3.71049	3.44818	1.49348e-12	2.1553	up
WBGene00010043	F54C9.7	263	419	349	800	1048	1061	6.7971	9.49282	7.51276	18.0383	22.2081	22.9051	1.50723e-12	1.13641	up
Caenorhabditis_elegans_newGene_1566	-	346	279	334	960	791	917	10.2958	7.2803	8.2975	24.9633	19.5623	22.8803	1.55877e-12	1.10808	up
WBGene00015055	pitr-3	114	152	163	466	527	411	1.94849	2.27347	2.31853	6.96141	7.40063	5.86837	1.61608e-12	1.3403	up
WBGene00194815	Y43F8B.23	15	11	7	166	116	116	0.577356	0.339603	0.209825	5.56952	3.6394	3.71427	1.62644e-12	2.87167	up
WBGene00016849	acs-21	166	241	315	657	792	726	2.78993	3.56115	4.42978	9.67551	10.9574	10.2417	1.6715e-12	1.2367	up
WBGene00219376	C28G1.10	64	115	75	391	330	370	2.02671	3.21269	2.00212	10.9455	8.67852	9.92704	1.71538e-12	1.69923	up
WBGene00006955	wrt-9	463	590	652	334	268	355	6.22338	6.95355	7.30225	3.91454	2.95148	3.98607	1.74684e-12	-1.15145	down
WBGene00008027	scl-5	368	292	227	885	1047	960	14.6795	10.2061	7.55298	30.8809	34.2993	32.0592	1.83011e-12	1.30709	up
WBGene00022487	fbxa-21	34	17	16	160	258	172	1.0962	0.459445	0.422961	4.52636	6.84112	4.65395	1.85264e-12	2.53116	up
WBGene00000062	acr-23	311	391	369	176	202	147	5.12867	5.71476	5.09982	2.52616	2.74847	2.01445	2.01055e-12	-1.34525	down
WBGene00021268	capa-1	486	373	431	1137	1145	1072	20.8393	14.0115	15.3624	42.5332	40.2325	38.3956	2.16579e-12	1.00872	up
WBGene00008492	F01D5.1	627	534	694	280	415	339	29.5565	22.0799	27.2362	11.5123	16.0166	13.3578	2.21985e-12	-1.1761	down
WBGene00008712	F11E6.9	260	329	466	150	172	117	11.1651	12.3783	16.6868	5.60206	6.05634	4.18526	2.33031e-12	-1.55017	down
WBGene00022309	rpc-11	498	668	556	223	350	327	31.481	37.0571	29.2797	12.288	18.1027	17.2491	2.3444e-12	-1.26135	down
WBGene00016180	C28C12.4	390	503	641	250	289	164	12.3595	13.9651	16.897	6.89973	7.48241	4.32583	2.72695e-12	-1.42499	down
WBGene00023489	F42A10.9	430	478	425	191	231	271	23.0609	22.4373	18.9594	8.89668	10.1432	12.1342	2.74508e-12	-1.27088	down
WBGene00021215	Y18H1A.11	41	43	35	216	200	230	1.26674	1.17471	1.2167	5.8891	5.53733	7.20225	2.82333e-12	1.98466	up
WBGene00018370	F42H10.6	514	603	580	232	323	368	23.3426	23.9995	22.1118	9.19009	12.0373	13.9761	3.17355e-12	-1.20565	down
WBGene00010403	otpl-8	156	212	265	49	88	44	2.1044	2.52046	2.98646	0.575458	0.976237	0.498638	3.3777e-12	-2.03206	down
WBGene00017818	F26D11.1	255	330	315	839	735	752	8.90583	10.1096	9.18435	25.645	21.0965	21.9846	3.499e-12	1.01469	up
WBGene00015599	fbxa-164	0	0	0	63	59	45	0	0	0	1.36273	1.20494	0.941574	3.54564e-12	4.23008	up
WBGene00000778	cpn-2	485	547	586	364	303	313	18.1075	14.7815	18.2378	10.0959	9.21708	9.7092	3.76201e-12	-1.05218	down
WBGene00009677	F44A6.5	192	196	246	854	686	521	5.48383	4.90953	5.85674	21.3274	16.0824	12.4432	3.8008e-12	1.32977	up
WBGene00008388	D1086.1	59	35	36	259	286	213	2.3188	1.18855	1.18421	8.97688	9.31284	7.07255	4.26592e-12	2.05654	up
WBGene00010320	F59B10.4	229	192	218	594	597	664	5.5911	4.08608	4.44746	12.6799	11.9555	13.6019	4.61674e-12	1.1645	up
WBGene00008599	F09A5.2	200	316	296	719	718	811	1.89924	2.62632	2.34131	5.96108	5.58802	6.43038	4.76385e-12	1.11458	up
WBGene00013836	fbxa-29	55	61	126	436	302	436	1.54615	1.5084	2.95752	10.7201	6.96347	10.2583	4.85438e-12	1.87152	up
WBGene00004443	rpl-29	5346	7926	7186	2906	3836	4038	620.063	806.198	694.712	293.629	365.321	391.785	4.96438e-12	-1.24161	down
WBGene00001767	gst-19	95	90	105	308	400	353	3.96011	3.28188	3.64563	11.213	13.6885	12.291	5.50118e-12	1.47926	up
WBGene00043302	F32D8.11	218	130	198	639	679	566	8.84318	4.69031	6.75077	22.9185	22.8554	19.4574	5.50732e-12	1.39355	up
WBGene00009921	F52B5.2	414	476	532	289	271	294	9.1283	9.21549	9.77151	5.55425	4.90285	5.41817	6.25869e-12	-1.06235	down
WBGene00003474	mtl-2	105	173	195	465	537	558	8.39603	12.0902	12.9799	32.4348	35.2221	37.3167	6.43429e-12	1.35739	up
WBGene00009291	clec-264	123	118	244	641	615	525	2.82251	2.3753	4.67133	12.8787	11.5895	10.0908	7.4636e-12	1.50481	up
WBGene00009983	cut-2	6589	11925	12435	4794	4441	4421	187.963	298.856	295.395	112.937	103.421	105.467	8.31958e-12	-1.46515	down
WBGene00008511	F01G10.9	401	331	433	203	214	156	6.77818	4.89135	6.09145	2.99197	2.95187	2.19912	8.33215e-12	-1.34356	down
WBGene00009404	F35C11.5	299	329	403	131	124	197	6.54626	6.3142	7.35351	2.50844	2.21542	3.59825	8.46168e-12	-1.4859	down
WBGene00003652	nhr-62	228	320	276	643	807	785	3.80553	4.68501	3.84345	9.39554	11.0499	11.0165	8.70182e-12	1.07793	up
WBGene00001751	gst-3	191	240	226	720	546	637	6.94375	7.63809	6.84155	22.8347	16.2723	19.3492	9.51759e-12	1.17132	up
WBGene00021951	srt-24	0	0	6	101	71	70	0	0	0.121411	2.28006	1.48881	1.50408	9.8225e-12	3.72565	up
WBGene00021624	Y47D7A.12	211	156	174	51	19	52	8.63134	5.5897	5.91072	1.81467	0.620732	1.7461	9.98388e-12	-2.32069	down
Caenorhabditis_elegans_newGene_712	-	229	215	286	658	634	655	3.20084	2.63215	3.33977	8.09339	7.30708	7.73665	1.32697e-11	1.05617	up
WBGene00021785	Y51H7C.7	653	796	686	398	272	466	33.4657	35.7439	29.2797	17.7782	11.4086	19.9197	1.50312e-11	-1.23085	down
WBGene00017502	F16B3.2	17	18	12	113	159	139	1.10516	1.03889	0.644815	6.51454	8.57103	7.65176	1.5068e-11	2.51946	up
WBGene00019968	R08F11.4	104	82	86	362	478	294	2.34009	1.61122	1.60822	7.15686	8.86973	5.56401	1.5154e-11	1.63785	up
WBGene00195081	C04F6.7	32	18	12	142	170	254	0.582959	0.289826	0.18444	2.28645	2.55799	3.90674	1.53367e-11	2.5518	up
WBGene00018153	F37C12.10	61	64	83	294	306	247	3.34028	3.03916	3.77582	14.0307	13.7105	11.2894	1.5852e-11	1.62475	up
WBGene00018763	F53F10.1	253	303	394	913	901	713	8.45412	8.87893	10.9672	26.6254	24.6983	19.9046	1.79592e-11	1.05931	up
WBGene00015366	C03A7.2	0	6	10	147	79	94	0	0.14504	0.230055	3.61205	1.80588	2.19625	1.90147e-11	3.29995	up
WBGene00004932	sod-3	97	67	117	319	367	455	3.22679	1.93004	3.23515	9.28316	10.0276	12.6654	2.14815e-11	1.61643	up
WBGene00022495	fbxa-78	39	48	59	232	196	300	1.24412	1.35688	1.59607	6.58666	5.22923	8.15035	2.17954e-11	1.88613	up
WBGene00020033	R12E2.7	421	988	774	370	350	298	29.2936	60.2943	44.8453	22.4582	19.9373	17.32	2.1855e-11	-1.39247	down
WBGene00007544	fipr-6	36	32	18	169	275	172	3.12825	2.40619	1.26943	12.9387	19.8157	12.5704	2.28378e-11	2.28591	up
WBGene00018931	ugt-52	70	77	108	343	321	295	1.14462	1.09864	1.47793	4.92036	4.33291	4.05323	2.64821e-11	1.52471	up
WBGene00003706	nhr-116	152	189	190	514	541	460	2.9533	3.21506	3.07041	8.72069	8.62797	7.46717	2.86671e-11	1.14792	up
WBGene00016262	C30F12.3	69	95	75	290	301	325	2.00008	2.39765	1.79447	7.33708	7.1588	7.8854	3.12578e-11	1.54035	up
WBGene00000979	dhs-16	276	376	420	164	189	199	5.87787	7.00286	7.43616	3.02936	3.29025	3.52271	3.34255e-11	-1.26669	down
WBGene00011310	T01B4.3	161	163	229	679	618	455	8.03198	7.13329	9.53097	29.7119	25.3946	19.0323	3.36485e-11	1.29454	up
WBGene00010033	F54B11.10	244	206	186	87	73	49	12.556	9.26922	7.95313	3.89619	3.05349	2.0888	3.36896e-11	-1.87224	down
WBGene00000886	cyn-10	374	427	499	251	271	258	17.4834	17.485	19.6546	10.484	10.4171	9.81917	3.41664e-11	-1.06257	down
WBGene00012221	W03C9.5	183	235	262	627	572	619	12.9623	14.5691	15.4286	38.7861	33.208	36.6312	3.8845e-11	1.06408	up
WBGene00015611	C08F1.8	44	47	68	250	247	218	1.40479	1.31809	1.83534	7.06788	6.54141	5.89063	3.88494e-11	1.75299	up
WBGene00007660	pals-6	9	17	2	399	527	253	0.169798	0.293097	0.023531	7.15915	8.88827	4.35274	4.03692e-11	3.71957	up
WBGene00007622	C16C10.1	580	660	628	321	330	458	11.7655	11.7485	10.6109	5.67757	5.48346	7.75633	4.15378e-11	-1.08266	down
WBGene00044617	bus-1	250	189	268	80	57	106	3.34094	2.21527	2.9792	0.932614	0.61622	1.18098	4.24396e-11	-1.80309	down
WBGene00007508	C10C5.4	18	3	10	168	171	87	0.343867	0.036171	0.161893	2.8955	2.76424	1.43505	4.29734e-11	2.93905	up
WBGene00008967	F20B10.3	347	510	671	275	261	263	10.979	14.1374	17.692	7.58115	6.75474	6.94645	4.34182e-11	-1.23596	down
WBGene00013903	ugt-3	27	18	24	188	144	146	0.461727	0.273408	0.341849	2.86465	2.04912	2.11835	5.00697e-11	2.25846	up
WBGene00016187	C28G1.2	0	5	0	60	106	58	0	0.142846	0	1.82296	3.00664	1.6852	5.3855e-11	3.68266	up
WBGene00003644	nhr-54	111	148	92	450	412	398	2.27266	2.65906	1.55936	8.07705	6.94749	6.82502	5.57596e-11	1.44729	up
WBGene00017022	D1022.3	67	45	79	270	337	247	2.12447	1.24537	2.11082	7.55184	8.86264	6.60995	5.75931e-11	1.73431	up
WBGene00007525	C11G10.1	69	97	130	370	366	333	2.19484	2.72065	3.48259	10.3676	9.64743	8.93144	5.77e-11	1.47534	up
WBGene00022072	cpg-9	492	584	417	291	235	273	31.0436	32.3111	21.9267	15.9944	12.1276	14.3796	5.77704e-11	-1.22998	down
WBGene00020407	chil-24	133	107	117	456	379	388	2.97975	2.09788	2.18417	8.95667	6.98765	7.29148	6.45154e-11	1.38423	up
WBGene00020583	T19D12.9	302	249	361	138	155	146	5.58988	4.04812	5.5748	2.22244	2.34397	2.26066	6.50192e-11	-1.36576	down
WBGene00271815	K04A8.21	0	0	0	48	53	44	0	0	0	2.85802	2.96704	2.52648	6.74929e-11	4.02753	up
WBGene00012428	Y11D7A.3	418	388	286	916	1075	1100	6.99901	5.67818	3.96864	13.3777	14.7316	15.3745	6.83615e-11	1.11604	up
WBGene00014106	ZK856.5	560	464	453	271	226	295	10.1859	7.45304	6.88251	4.30827	3.36632	4.47063	7.6876e-11	-1.23163	down
WBGene00045272	F59C12.4	103	165	122	38	33	31	10.4839	14.7213	10.267	3.30581	2.75066	2.61068	8.17685e-11	-2.12632	down
WBGene00007453	fbxa-98	8	41	28	250	170	190	0.217486	1.04467	0.65479	6.24479	3.93695	4.47112	8.17873e-11	2.42899	up
WBGene00012187	rpb-11	542	884	741	295	474	431	34.1891	48.4496	38.5852	16.194	24.1455	22.7976	9.05839e-11	-1.17235	down
WBGene00003686	nhr-96	229	210	269	792	622	586	5.26311	4.21073	5.13706	15.8747	11.7173	11.2429	9.48722e-11	1.13311	up
Caenorhabditis_elegans_newGene_166	-	42	22	20	192	220	166	0.862192	0.424985	0.345956	3.25472	3.44055	2.37459	9.84698e-11	2.22711	up
WBGene00011213	R10E8.8	100	103	174	411	441	415	2.5753	2.46109	3.84049	9.459	9.71865	9.17466	1.00988e-10	1.377	up
WBGene00012476	Y18D10A.3	186	146	218	559	569	497	4.24112	2.90822	4.12797	11.137	10.6499	9.47207	1.01166e-10	1.1913	up
WBGene00000521	cky-1	276	452	472	187	232	184	3.31813	4.77382	4.73439	1.96425	2.28674	1.84642	1.01484e-10	-1.29529	down
WBGene00010041	F54C9.3	223	241	272	653	927	567	17.644	16.72	17.9554	45.2225	60.3093	37.5601	1.0487e-10	1.17251	up
WBGene00011540	T06E6.10	122	126	118	310	494	530	4.02874	3.67256	3.26358	8.98683	13.477	14.7092	1.0768e-10	1.46446	up
WBGene00019473	cyp-35A5	85	131	92	20	20	4	1.44147	1.94767	1.30243	0.286586	0.27639	0.049014	1.15128e-10	-2.76665	down
WBGene00017838	F26G1.2	257	166	255	779	721	597	10.3195	6.00121	8.8188	26.74	23.6479	19.8731	1.22982e-10	1.24688	up
WBGene00271817	F55C12.19	49	86	51	315	270	253	2.1639	3.35597	1.88412	12.2204	9.83416	9.40417	1.27213e-10	1.74495	up
WBGene00007537	fipr-8	39	52	29	178	270	209	3.12675	3.8245	2.04977	13.1299	18.7356	14.8742	1.57228e-10	1.97101	up
WBGene00044331	clec-25	34	27	31	121	239	229	0.832777	0.586273	0.626767	2.63966	4.90132	4.78908	1.58684e-10	2.15506	up
WBGene00008616	fbxa-44	141	188	153	484	536	423	3.83488	4.49441	3.47831	11.5307	11.9968	9.65419	1.76325e-10	1.20749	up
WBGene00022597	ZC395.5	30	38	42	171	228	169	2.17537	2.47009	2.55509	11.0972	13.9073	10.4611	1.81845e-10	1.91299	up
WBGene00018511	F46F11.8	151	176	144	392	679	514	3.12011	3.20109	2.47758	7.10599	11.5634	8.90942	1.84149e-10	1.35633	up
WBGene00007878	C33A11.2	49	78	55	313	271	220	1.27935	1.78598	1.18366	7.14791	5.80543	4.80121	1.87327e-10	1.71968	up
WBGene00004451	rpl-37	355	443	371	137	229	214	30.0321	32.5539	26.076	9.96853	15.8766	15.0449	1.93142e-10	-1.32882	down
WBGene00016492	C37A2.6	172	169	212	82	66	61	5.95399	5.10329	6.09562	2.45659	1.86745	1.75206	1.93999e-10	-1.67421	down
WBGene00017201	grsp-4	2848	4182	4987	1650	2121	2273	133.241	171.463	194.325	67.3414	81.3438	88.796	2.32401e-10	-1.29048	down
WBGene00001756	gst-8	17	9	7	77	156	145	0.68306	0.297936	0.224416	2.73316	5.2173	4.93546	2.38925e-10	2.74129	up
WBGene00020105	R148.7	152	255	257	90	87	89	5.18076	7.60344	7.28786	2.66397	2.42913	2.52096	2.42671e-10	-1.58953	down
WBGene00001671	gpa-9	79	69	79	243	332	294	1.94236	1.48886	1.61476	5.20861	6.69093	6.03451	2.50843e-10	1.52759	up
WBGene00019444	frpr-11	53	77	63	231	314	246	1.26615	1.60731	1.24654	4.81958	6.14377	4.91105	2.75609e-10	1.62083	up
WBGene00009447	F35H8.2	213	194	257	547	589	616	4.66039	3.72538	4.67384	10.4572	10.5775	11.2668	2.84999e-10	1.03721	up
WBGene00020941	W02D7.5	22	16	10	109	148	150	0.730024	0.452791	0.260453	3.15693	4.04688	4.16231	2.90809e-10	2.44745	up
WBGene00022329	fbxa-79	107	94	174	551	393	410	2.85135	2.19997	3.87054	12.8849	8.63013	9.16727	2.96021e-10	1.47113	up
WBGene00235114	ZK105.13	99	98	166	366	451	404	3.28652	2.84945	4.59309	10.6148	12.2953	11.2316	2.96539e-10	1.37398	up
WBGene00000788	cpz-1	2978	4550	5135	10389	11567	10682	78.9209	105.308	113.06	239.797	250.902	236.632	2.97741e-10	1.01887	up
WBGene00021176	txt-3	152	105	161	485	491	397	3.72186	2.25448	3.2838	10.4011	9.88988	8.15512	3.00937e-10	1.32835	up
WBGene00044894	Y71F9AR.4	322	269	275	137	147	141	16.0678	11.7624	11.4432	5.94473	5.98829	5.8695	3.02372e-10	-1.34848	down
WBGene00011699	cyp-34A2	12	13	20	106	156	109	0.193044	0.184905	0.271631	1.56693	2.17033	1.54145	3.07376e-10	2.43945	up
WBGene00008494	F01D5.3	177	179	158	65	25	15	7.42264	6.56892	5.51665	2.35492	0.852451	0.524425	3.10915e-10	-2.39582	down
WBGene00012699	Y39B6A.41	5	21	18	147	150	105	0.082317	0.310215	0.247637	2.22007	2.12379	1.52246	3.15725e-10	2.5564	up
WBGene00000168	apx-1	354	308	488	169	191	226	4.18308	3.20991	4.828	1.81091	1.83682	2.22516	3.22598e-10	-1.28142	down
WBGene00020300	ssna-1	440	721	562	303	362	350	24.297	34.3546	25.4986	15.2152	16.1688	16.2043	3.25649e-10	-1.08667	down
WBGene00011285	ttr-28	237	257	313	100	158	109	12.0043	11.4018	13.2321	4.4067	6.5712	4.59334	3.28142e-10	-1.43662	down
WBGene00007729	clec-185	108	130	125	12	19	41	1.95256	2.05905	1.87007	0.183201	0.271106	0.608726	3.3214e-10	-2.42378	down
WBGene00016976	C56E10.3	67	40	75	319	273	232	0.927406	0.485652	0.87591	3.89557	3.13881	2.70819	3.56322e-10	1.74485	up
WBGene00020039	R12E2.14	215	570	489	169	161	181	18.8856	43.8858	35.7663	12.8947	11.576	13.2303	3.68467e-10	-1.5777	down
WBGene00011672	cyp-13A5	122	55	155	831	996	804	2.01936	0.803448	2.14966	12.0834	13.6082	11.201	3.79911e-10	2.39347	up
WBGene00018880	acc-3	96	120	112	299	416	373	1.5017	1.65263	1.47015	4.11032	5.36742	4.90509	3.83071e-10	1.34405	up
WBGene00016926	nhr-171	4	11	3	125	90	68	0.089403	0.208718	0.037726	2.4503	1.65006	1.26327	4.23856e-10	3.01684	up
WBGene00018415	nhr-184	170	121	172	571	466	441	3.75189	2.32689	3.15805	11.0025	8.42855	8.1251	4.80441e-10	1.29015	up
WBGene00022374	nhr-277	411	404	517	270	301	244	7.15717	6.15651	7.49357	4.0939	4.28459	3.53942	4.85542e-10	-1.03666	down
WBGene00017747	F23F1.6	91	98	95	321	378	279	1.35366	1.27968	1.17393	4.17535	4.61966	3.46788	4.96877e-10	1.39035	up
WBGene00016034	C24A3.4	130	162	187	420	443	579	3.16991	3.47807	3.80302	8.96435	8.8887	11.8371	5.17891e-10	1.22282	up
WBGene00016066	acd-2	83	65	122	313	614	300	0.996307	0.684155	1.22635	3.29322	6.07448	3.01924	5.31461e-10	1.74918	up
WBGene00006897	ver-4	291	342	320	171	162	189	2.16215	2.22605	1.97806	1.10578	0.979971	1.16731	5.48578e-10	-1.18911	down
WBGene00012020	gyg-2	144	125	196	486	437	471	3.71807	2.83099	4.21971	10.999	9.30232	10.2002	5.68782e-10	1.2154	up
WBGene00004452	rpl-38	14557	19827	17422	8183	11557	11270	1419.49	1695.21	1414.89	695.653	924.274	918.77	5.96823e-10	-1.06829	down
WBGene00008681	scrm-4	238	211	234	572	815	557	6.74561	5.23478	5.52133	14.1436	18.9359	13.188	6.46522e-10	1.12987	up
WBGene00020612	arrd-22	565	645	668	292	395	469	10.3195	10.3256	10.1689	4.65708	5.91698	7.16238	6.57453e-10	-1.03	down
WBGene00003718	nhr-128	175	164	239	496	522	591	3.35632	2.74463	3.76954	8.29588	8.38266	9.00753	6.68676e-10	1.11411	up
WBGene00008591	F08H9.3	28	22	28	157	262	115	1.294	0.883058	1.07065	6.48992	10.1624	4.55542	6.74066e-10	2.21968	up
WBGene00001750	gst-2	141	126	108	500	452	343	5.94981	4.65984	3.7983	18.4007	15.6292	12.0971	6.7475e-10	1.38577	up
WBGene00001695	grd-6	506	896	953	509	457	343	8.02821	12.3013	12.5125	6.91967	5.78613	4.43114	6.89965e-10	-1.15069	down
WBGene00019660	K11H12.4	375	427	353	150	174	250	8.06615	8.04485	6.32165	2.80191	3.06579	4.48266	7.055e-10	-1.32481	down
WBGene00003856	odr-10	115	166	242	513	549	531	2.85124	3.61625	5.02248	11.1663	11.2288	11.063	7.21124e-10	1.24891	up
WBGene00009981	F53F1.3	724	552	706	469	376	370	22.2258	14.8475	18.0352	12.5652	9.46016	9.48041	7.31774e-10	-1.04133	down
WBGene00022345	fbxa-138	9	8	48	219	203	177	0.296833	0.222905	1.32927	6.39229	5.56018	4.95207	7.52171e-10	2.57272	up
WBGene00004453	rpl-39	5469	7703	7449	2599	4025	3991	644.093	794.966	730.53	267.049	388.459	392.468	7.89958e-10	-1.26801	down
Caenorhabditis_elegans_newGene_1764	-	367	410	371	154	247	215	10.7929	10.5502	9.08516	3.94279	5.94738	5.22855	7.95024e-10	-1.22346	down
WBGene00022643	ZK6.8	98	118	133	319	407	362	1.64635	1.73612	1.85178	4.68253	5.60802	5.08854	8.49365e-10	1.26458	up
WBGene00001096	dsc-1	53	42	108	267	302	357	1.40496	0.973988	2.39381	6.19617	6.57546	7.9197	8.83873e-10	1.76814	up
WBGene00019022	F58A6.1	139	197	260	513	556	721	4.18859	5.21868	6.55717	13.5677	13.7923	18.2374	8.86394e-10	1.22718	up
WBGene00044001	C09G4.4	333	394	459	247	252	215	15.2685	15.8249	17.5475	9.90038	9.48732	8.23943	9.31351e-10	-1.05395	down
Caenorhabditis_elegans_newGene_138	-	54	61	85	6	13	7	1.28883	1.27164	2.07789	0.104729	0.240376	0.135958	1.00494e-09	-2.80511	down
WBGene00020040	R12E2.15	338	697	706	289	334	278	29.8635	54.0414	51.9998	22.319	24.1845	20.5466	1.11662e-09	-1.2452	down
WBGene00014020	ZK632.14	741	738	622	360	405	525	25.0978	21.8982	17.5462	10.6274	11.2247	14.8528	1.19763e-09	-1.0438	down
WBGene00011171	R09E10.1	134	101	131	388	429	352	3.41003	2.23016	2.77341	8.87643	9.01835	7.49689	1.23043e-09	1.28612	up
WBGene00015692	ugt-25	321	447	643	1638	1823	2386	5.35478	6.53797	8.94464	23.8747	24.9726	33.2997	1.26888e-09	1.64969	up
WBGene00044483	H06H21.11	508	525	446	328	279	301	24.7316	22.4244	18.0776	13.9396	11.1476	12.2496	1.28683e-09	-1.04031	down
WBGene00011799	T16G1.5	43	79	47	286	254	216	0.786352	1.26723	0.715293	4.56858	3.81098	3.30138	1.29202e-09	1.72771	up
WBGene00012921	Y46G5A.36	111	186	268	64	47	17	5.80872	8.52702	11.6976	2.90416	1.98377	0.707355	1.30697e-09	-2.24654	down
WBGene00021079	W08A12.2	119	112	155	329	475	417	8.07111	6.24771	8.63771	18.513	25.0555	22.7689	1.31074e-09	1.28077	up
WBGene00012424	dlc-3	84	94	153	378	442	321	5.6396	5.53195	8.55717	22.118	24.246	17.9897	1.32197e-09	1.40562	up
WBGene00045048	D1007.19	84	72	81	15	15	16	4.47091	3.35732	3.56467	0.694988	0.632545	0.700254	1.33025e-09	-2.43425	down
WBGene00020363	fbxa-3	91	127	77	416	368	305	2.41172	2.94391	1.69025	9.66794	8.0321	6.78115	1.33577e-09	1.47751	up
Caenorhabditis_elegans_newGene_706	-	25	23	16	158	199	102	0.250007	0.203015	0.136215	1.51086	1.81902	0.87193	1.3735e-09	2.25821	up
WBGene00019014	F57C12.2	92	123	158	352	531	365	2.80883	3.31205	4.04725	9.44718	13.3943	9.38275	1.42648e-09	1.3625	up
WBGene00018354	F42G2.5	41	67	104	326	351	236	0.778841	1.12288	1.66882	5.49445	5.56891	3.81435	1.48839e-09	1.69834	up
WBGene00012271	W05B2.2	173	213	303	93	55	104	1.23085	1.33458	1.79994	0.578746	0.320385	0.617305	1.54929e-09	-1.69302	down
WBGene00020487	T13C5.7	77	113	189	32	34	15	3.39533	4.40131	7.07231	1.22052	1.21472	0.546	1.5856e-09	-2.30882	down
WBGene00010987	R03C1.1	185	442	537	140	174	142	3.91359	8.60574	10.0687	2.49621	3.12223	2.67183	1.65998e-09	-1.59801	down
WBGene00015537	C06E4.8	2	0	0	60	48	42	0.052848	0	0	1.72041	1.27201	1.1481	1.67322e-09	3.61583	up
WBGene00009824	gpdh-1	636	626	982	426	418	547	13.4953	11.6445	17.3591	7.87819	7.26383	9.69921	1.70537e-09	-1.00795	down
WBGene00019108	chpf-2	185	200	225	486	658	497	6.95127	6.58736	7.05229	15.9774	20.3332	15.6396	1.76508e-09	1.06028	up
WBGene00000099	air-2	555	583	792	484	353	342	13.7531	12.6508	16.3359	10.4554	7.17231	7.0765	1.76958e-09	-1.02921	down
WBGene00077764	F59C6.16	18	6	7	93	184	90	1.95938	0.582351	0.575117	8.99227	16.8219	8.3647	1.76978e-09	2.72901	up
WBGene00007745	C26D10.4	209	170	243	553	578	532	2.28023	1.6238	2.2091	5.26397	5.16607	4.84528	1.77346e-09	1.05207	up
WBGene00018345	F42C5.3	12	3	9	305	476	115	0.373372	0.031607	0.215364	8.51622	12.5117	3.18855	1.78973e-09	3.48619	up
WBGene00004052	parg-2	29	21	26	121	154	186	0.545831	0.345964	0.410024	1.99711	2.40527	2.95091	1.83106e-09	2.07753	up
WBGene00011643	slc-17.9	129	157	198	44	75	44	1.87908	1.99172	2.39388	0.550399	0.885696	0.534344	1.89649e-09	-1.80599	down
WBGene00021565	Y45G12C.1	233	259	274	151	104	99	5.15721	5.04209	5.05668	2.91002	1.88495	1.83439	1.97678e-09	-1.40886	down
WBGene00045397	Y54G2A.52	240	224	249	553	722	571	12.2376	10.0152	10.598	24.6669	30.2565	24.3742	1.98375e-09	1.00272	up
WBGene00010319	F59B10.3	419	683	704	416	320	279	12.6205	18.0416	17.6843	10.9492	7.89521	7.01074	1.98662e-09	-1.13686	down
WBGene00011668	clec-47	374	368	268	934	890	839	17.1344	14.7815	10.2006	37.3553	33.4507	32.1103	2.16022e-09	1.01937	up
WBGene00044723	K11H12.11	339	212	342	158	110	80	7.4303	4.06604	6.24481	3.00867	1.97167	1.46239	2.18762e-09	-1.635	down
WBGene00015748	C14A11.2	74	123	125	325	391	337	2.17502	3.16598	3.05885	8.38495	9.46873	8.30866	2.2032e-09	1.33291	up
WBGene00016783	irg-2	9	6	22	108	125	109	0.259376	0.129939	0.522156	2.78578	3.01426	2.69249	2.20518e-09	2.53711	up
WBGene00008890	ser-5	133	182	209	401	545	603	2.26117	2.71243	2.96918	5.96829	7.62836	8.60226	2.24669e-09	1.19699	up
WBGene00010658	K08D8.4	534	460	565	303	387	267	8.53313	6.41766	7.5547	4.2089	5.0725	3.54686	2.34285e-09	-1.03902	down
WBGene00017785	F25E5.4	187	235	290	751	548	620	3.10272	3.40853	3.99688	10.8783	7.45458	8.58708	2.47546e-09	1.07628	up
WBGene00017786	F25E5.5	333	315	224	831	907	718	7.49614	6.20817	4.20368	16.3359	16.7519	13.5109	2.48912e-09	1.10545	up
WBGene00194641	F47G3.4	118	148	82	364	538	384	8.65031	9.56941	4.99922	23.4187	32.5849	23.6598	2.55889e-09	1.467	up
WBGene00017051	afmd-1	63	58	59	201	236	300	1.77105	1.43221	1.36986	4.93867	5.46277	7.06348	2.61167e-09	1.60682	up
WBGene00014052	ZK669.2	246	321	309	107	181	143	7.43369	8.48993	7.77537	2.81658	4.47506	3.58813	2.69448e-09	-1.32984	down
WBGene00015279	cest-5.1	88	113	132	347	420	301	1.38773	1.5576	1.72401	4.77773	5.41976	3.9585	2.75221e-09	1.30298	up
WBGene00021219	Y19D10A.4	292	282	299	537	1068	1101	5.66584	4.88726	4.82557	9.31328	19.4206	17.8739	2.82114e-09	1.24311	up
WBGene00004398	rol-8	6623	10481	12233	5721	5694	5508	162.757	225.715	250.349	122.677	114.683	113.046	2.88163e-09	-1.0987	down
WBGene00015139	B0310.3	116	109	120	338	343	364	2.07776	1.85644	1.93072	5.70345	5.43989	5.77188	3.05661e-09	1.21795	up
WBGene00008091	C44F1.1	527	664	709	346	278	481	5.97344	6.59427	6.68517	3.41467	2.57767	4.55162	3.05825e-09	-1.09702	down
WBGene00000024	abu-1	243	389	503	210	125	170	4.78969	6.72967	8.27413	3.60904	2.02096	2.80476	3.08952e-09	-1.43638	down
WBGene00015045	cyp-34A10	6	3	15	65	119	116	0.094263	0.04402	0.219741	0.989382	1.72568	1.70405	3.26814e-09	2.79556	up
WBGene00016598	C42D4.13	63	52	63	268	209	233	2.13446	1.5315	1.77947	7.9762	5.84649	6.6393	3.35763e-09	1.57663	up
WBGene00008513	F02A9.1	131	165	122	351	474	474	4.29352	4.75721	3.32803	10.0921	12.8225	13.0517	3.40164e-09	1.24824	up
WBGene00044074	mltn-5	104	147	161	54	28	17	1.2891	1.58787	1.65826	0.575084	0.281586	0.171955	3.67029e-09	-2.1816	down
WBGene00016310	txt-18	90	171	176	554	446	410	2.20827	3.67028	3.59904	11.8639	8.9648	8.39666	3.83243e-09	1.32215	up
WBGene00000029	abu-6	106	257	239	37	45	85	2.50765	5.33019	4.69758	0.753739	0.863957	1.67613	4.10141e-09	-2.01422	down
WBGene00012371	W09G3.8	258	332	346	178	170	187	20.6101	23.001	23.0511	12.4253	11.2577	12.39	4.17846e-09	-1.12264	down
WBGene00016191	C28G1.6	79	116	110	349	379	276	2.11098	2.72695	2.44661	8.20029	8.36158	6.19162	4.20514e-09	1.33551	up
WBGene00014251	gstk-1	462	491	537	232	382	289	16.0795	14.9784	15.5611	7.04295	10.8911	8.39141	4.26919e-09	-1.05316	down
WBGene00009178	uggt-2	59	52	51	227	193	250	0.380293	0.293897	0.273127	1.28589	1.02724	1.35588	4.40555e-09	1.61743	up
WBGene00020359	math-40	88	175	127	410	420	422	2.49039	4.35449	3.01495	10.1947	9.79629	10.0469	4.42962e-09	1.30531	up
WBGene00016797	C50A2.3	158	222	173	460	613	482	4.55111	5.78451	4.12665	11.6482	14.6158	11.8975	4.57505e-09	1.11767	up
WBGene00010188	F57B1.5	114	125	195	393	500	414	6.64234	6.3819	9.49493	20.0978	24.0095	20.2654	4.94046e-09	1.22245	up
WBGene00021085	W08E12.4	163	311	307	109	116	122	7.974	13.3782	12.5401	4.63725	4.66026	4.99346	4.96245e-09	-1.44498	down
WBGene00008953	F19C6.4	187	96	171	475	583	480	2.74615	1.23354	2.09425	6.1011	7.0333	5.90325	5.13575e-09	1.35504	up
WBGene00044221	F41G3.18	111	52	102	296	440	350	6.43627	2.74381	5.3775	15.4916	22.6752	18.5304	5.13858e-09	1.59767	up
WBGene00003702	nhr-112	64	94	100	265	391	267	1.53973	2.00632	2.02887	5.6381	7.81079	5.44515	5.37641e-09	1.44359	up
WBGene00020714	T23B3.6	197	278	216	539	601	673	4.08069	5.05456	3.7235	9.76613	10.2248	11.6712	5.61883e-09	1.02569	up
WBGene00044527	Y39H10B.2	148	143	225	507	531	427	4.30986	3.63394	5.66554	12.9566	12.7466	10.4507	5.93537e-09	1.14092	up
WBGene00284846	ZC262.13	48	49	67	217	233	196	3.32053	2.96023	3.92237	13.3235	13.4223	11.474	6.11927e-09	1.56498	up
WBGene00008598	spin-3	159	276	193	54	105	74	2.64246	4.02149	2.67853	0.781935	1.43374	1.02718	6.17952e-09	-1.68799	down
WBGene00001107	dsl-5	242	237	296	125	108	43	7.37113	6.33651	7.52519	3.33047	2.7022	1.08387	6.27136e-09	-1.73534	down
WBGene00019550	K09C4.5	275	199	243	89	85	132	4.41484	2.79773	3.24709	1.24884	1.11752	1.76823	6.40469e-09	-1.521	down
WBGene00010951	M199.2	157	263	224	502	640	601	2.70733	3.98955	3.23106	7.57949	9.08497	8.69661	6.42287e-09	1.07401	up
WBGene00009706	argk-1	28	55	60	210	198	219	0.632855	1.10526	1.12906	4.18937	3.72341	4.19761	6.54284e-09	1.70948	up
WBGene00018748	F53C3.4	170	111	132	439	568	377	4.57717	2.54478	2.96173	10.1619	12.8541	8.49924	6.75622e-09	1.33549	up
WBGene00021223	Y19D10A.8	125	127	122	38	51	34	2.5465	2.23187	2.02873	0.673131	0.826376	0.539924	6.91883e-09	-1.83895	down
WBGene00016074	dnsn-1	476	491	468	328	320	222	7.46497	6.78657	5.85393	4.50816	3.98851	2.80859	7.08881e-09	-1.05404	down
WBGene00015624	C09B8.5	14	22	25	152	101	139	0.294124	0.406395	0.447356	2.86881	1.79031	2.5119	7.77778e-09	2.14717	up
WBGene00007166	fbxa-152	88	108	149	331	426	329	2.1457	2.31148	3.01498	7.05389	8.52406	6.70947	7.8418e-09	1.27942	up
WBGene00021576	fbxc-51	7	7	21	130	94	98	0.116408	0.090178	0.288824	1.91362	1.28986	1.38044	8.41319e-09	2.51575	up
WBGene00001646	gna-1	322	420	506	228	215	287	14.3035	16.3887	18.7502	8.84886	7.83125	10.6724	9.29876e-09	-1.08443	down
WBGene00008097	ugt-15	144	141	187	504	509	359	2.32208	1.98537	2.51165	7.09169	6.73499	4.83688	9.37404e-09	1.16688	up
WBGene00077691	T06E4.14	387	754	914	385	314	398	13.9321	23.7794	27.3935	12.0791	9.241	11.9509	9.7466e-09	-1.19234	down
WBGene00005016	sqt-1	8626	13698	15060	8074	7509	7397	230.088	320.184	334.614	187.917	164.573	164.894	1.05818e-08	-1.01213	down
WBGene00020247	T05B11.4	14	13	21	133	98	108	0.269365	0.212121	0.332903	2.27852	1.57622	1.7695	1.0627e-08	2.23897	up
WBGene00012866	afmd-2	74	100	136	386	293	346	2.36796	2.83758	3.65168	10.9566	7.85474	9.4207	1.07144e-08	1.35049	up
WBGene00017390	F12A10.1	15	12	20	67	164	152	1.03799	0.70937	1.17702	4.26451	9.84551	9.28626	1.109e-08	2.37479	up
WBGene00012657	Y39A1A.20	203	253	304	136	142	118	13.4529	14.6988	16.8237	7.87791	7.72511	6.51847	1.19659e-08	-1.24244	down
WBGene00004229	ptr-15	337	581	580	281	311	310	3.52323	5.38504	5.13033	2.54251	2.63106	2.69488	1.19674e-08	-1.04329	down
WBGene00013840	fbxa-151	37	47	84	214	230	259	1.22704	1.3631	2.30686	6.20223	6.25587	7.20869	1.25563e-08	1.6512	up
Caenorhabditis_elegans_newGene_1771	-	34	33	52	178	189	165	0.559727	0.564689	0.728609	2.84154	2.8825	2.49809	1.25685e-08	1.72038	up
WBGene00001766	gst-18	148	171	199	66	75	84	6.88301	7.00278	7.73166	2.6652	2.85476	3.26204	1.28715e-08	-1.48201	down
WBGene00020484	T13C5.3	91	229	190	15	66	14	3.3816	7.52734	5.90436	0.473239	2.0195	0.422147	1.30174e-08	-2.43351	down
WBGene00010799	chil-12	158	140	127	355	462	456	3.22587	2.50823	2.16685	6.3599	7.76805	7.81642	1.38863e-08	1.19063	up
Caenorhabditis_elegans_newGene_1287	-	13	8	3	84	181	60	0.346427	0.269241	0.045784	1.9062	3.97404	1.37179	1.39851e-08	2.78722	up
WBGene00007551	C13C4.7	104	135	125	390	347	329	2.7704	3.1723	2.78819	9.12211	7.6224	7.36102	1.40075e-08	1.17632	up
WBGene00020943	W02D7.8	7	9	0	93	62	104	0.425771	0.461159	0	4.97931	3.1071	5.35442	1.41564e-08	2.92308	up
WBGene00019590	K09F6.7	100	143	128	352	375	346	2.83178	3.53976	3.00997	8.71447	8.72602	8.20088	1.463e-08	1.15998	up
WBGene00020898	lido-16	19	13	16	114	123	97	0.562945	0.333638	0.385855	2.98614	3.0148	2.42648	1.59339e-08	2.20371	up
WBGene00016135	C26B9.6	121	83	181	381	414	497	3.13736	1.88336	3.90999	8.6635	8.82939	10.8108	1.64864e-08	1.36011	up
WBGene00021979	Y58A7A.5	43	49	43	229	227	145	1.15024	1.14011	0.954936	5.35026	4.97858	3.24233	1.6566e-08	1.70403	up
WBGene00044348	Y71G12B.31	63	59	80	288	251	205	1.45912	1.1317	1.51898	6.71853	4.56913	3.83191	1.70326e-08	1.47529	up
WBGene00011678	T10B9.9	95	167	106	386	397	381	5.55566	8.57694	5.14545	19.7033	19.052	18.6507	1.80261e-08	1.27622	up
WBGene00019677	K12H4.2	282	345	362	213	152	196	11.9533	12.8114	12.7837	7.86805	5.27751	6.91935	1.94269e-08	-1.12991	down
WBGene00003575	ncx-10	131	132	110	360	432	335	1.80865	1.59168	1.25048	4.3407	4.88439	3.86533	1.97167e-08	1.2038	up
WBGene00004007	pgp-13	55	49	71	313	212	193	0.362805	0.287891	0.392833	1.83138	1.16441	1.08173	2.11237e-08	1.61213	up
Caenorhabditis_elegans_newGene_1650	-	45	71	81	254	240	224	0.774816	1.10112	1.18912	3.93181	3.50351	3.32098	2.14677e-08	1.47017	up
WBGene00020250	T05C1.3	274	304	290	143	189	100	9.40058	9.14377	8.29213	4.27422	5.31729	2.86743	2.18969e-08	-1.31543	down
WBGene00011309	R186.8	331	418	431	178	271	255	28.3518	31.6185	30.7106	13.3927	18.4789	18.375	2.19544e-08	-1.06677	down
WBGene00010009	F53H4.4	91	63	83	298	274	258	1.90549	1.16442	1.45453	5.4901	4.74036	4.55025	2.27481e-08	1.39927	up
WBGene00019456	K06H7.2	191	319	256	816	601	632	3.8354	5.62237	4.29292	14.3505	9.91772	10.6356	2.31918e-08	1.05963	up
WBGene00022550	droe-8	11	14	6	112	147	57	0.182938	0.211275	0.078852	1.67494	2.05413	0.821232	2.39593e-08	2.55716	up
WBGene00014047	clec-61	32	54	57	163	302	188	0.706378	1.03634	1.04413	3.16629	5.51254	3.48482	2.4238e-08	1.74175	up
WBGene00019471	cyp-35B2	0	6	0	59	67	53	0	0.094783	0	0.953213	1.01465	0.807394	2.42406e-08	3.22426	up
WBGene00005271	srh-48	33	43	31	176	182	142	0.71129	0.787865	0.547369	3.50246	3.39127	2.63481	2.52832e-08	1.75915	up
WBGene00019763	galt-1	221	171	158	40	61	91	4.29286	2.91218	2.55284	0.673409	0.96761	1.47237	2.53611e-08	-1.76991	down
WBGene00011141	nlp-66	86	82	89	302	231	354	4.82778	4.02243	4.12992	14.7799	10.6026	16.575	2.5756e-08	1.38714	up
WBGene00015554	C06G3.8	343	416	311	163	235	207	14.073	16.9867	10.3983	5.91709	8.56387	7.51999	2.68919e-08	-1.14979	down
WBGene00195183	R04A9.9	42	18	24	160	184	146	2.50238	0.91876	1.21765	8.92304	9.59319	7.80884	2.7976e-08	1.99532	up
Caenorhabditis_elegans_newGene_429	-	19	6	6	103	132	83	0.337783	0.074748	0.073206	1.48529	1.85819	1.19799	2.83997e-08	2.5442	up
WBGene00012420	Y7A9D.1	314	273	307	150	174	187	14.9526	11.3896	12.1883	6.2102	6.7958	7.43766	2.91083e-08	-1.13293	down
WBGene00011554	T07A5.1	29	49	60	170	238	187	0.636152	0.951102	1.11131	3.31103	4.35764	3.48216	3.0068e-08	1.67703	up
WBGene00022440	Y110A2AL.3	82	59	61	205	257	384	5.48544	3.43176	3.38321	12.0327	14.1674	21.532	3.06634e-08	1.6161	up
WBGene00017024	D1022.5	0	4	4	56	45	75	0	0.132022	0.122996	1.84427	1.38864	2.35941	3.11938e-08	3.08606	up
WBGene00011537	T06E4.10	217	526	405	157	189	198	9.12315	19.376	14.1855	5.7594	6.52204	6.95904	3.18214e-08	-1.35723	down
WBGene00017806	F26A1.8	38	14	29	173	169	137	0.770949	0.247792	0.484761	3.10207	2.86015	2.346	3.35241e-08	2.01608	up
WBGene00021336	Y34F4.1	50	92	102	315	244	311	2.27959	3.44247	3.60027	11.686	8.48821	10.9951	3.38816e-08	1.4464	up
WBGene00007973	C36B1.6	86	70	61	333	248	239	3.39443	2.45949	2.00021	11.5162	8.03458	7.91448	3.6264e-08	1.49007	up
WBGene00021441	Y39A3CL.3	124	193	143	62	63	58	15.1632	20.735	14.6025	6.58562	6.26601	5.93262	3.64623e-08	-1.59076	down
WBGene00045252	Y62H9A.15	76	58	47	219	226	294	4.42133	2.45846	1.88595	9.67159	9.91214	12.6738	3.72408e-08	1.58106	up
WBGene00022063	nlp-81	148	271	313	713	752	559	7.76111	12.5211	13.6242	32.7453	32.4234	24.5814	3.75342e-08	1.11322	up
WBGene00017315	ugt-36	13	19	22	139	111	95	0.208437	0.270375	0.289894	2.00021	1.50141	1.31348	3.86134e-08	2.11964	up
[truncated: 572 more rows]

## Sheet: Sheet2
According to reference, a total of 30 class Ⅰ genes were up-regulated, and 10 class Ⅱ were down-regulated of C. elegans on CeMM (Tepper et al., 2013). Marked yellow genes represent overlapped within 41 daf-16 target genes.
gene ID	gene name	N2-OP501_Count	N2-OP502_Count	N2-OP503_Count	N2-CeMM1_Count	N2-CeMM2_Count	N2-CeMM3_Count	N2-OP501_FPKM	N2-OP502_FPKM	N2-OP503_FPKM	N2-CeMM1_FPKM	N2-CeMM2_FPKM	N2-CeMM3_FPKM	FDR	log2FC	regulated
WBGene00001564	icl-1	9247	8592	11497	120606	134417	101238	80.9243	64.881	82.1939	917.784	950.552	726.572	5.58283e-113	3.21583	up
WBGene00010790	sodh-1	13210	10937	12596	52415	58909	53710	280.913	203.809	223.077	972.631	1026.81	953.906	3.7995e-39	1.78966	up
WBGene00003473	mtl-1	5	28	24	1086	1222	1363	0.351447	1.77791	1.44759	70.5781	74.6193	84.7797	4.60673e-28	4.88682	up
WBGene00007363	stdh-1	526	658	553	2001	1969	1353	13.1626	14.4415	11.5382	43.7575	40.4381	28.3119	4.27203e-18	1.25064	up
WBGene00004932	sod-3	97	67	117	319	367	455	3.22679	1.93004	3.23515	9.28316	10.0276	12.6654	2.14815e-11	1.61643	up
WBGene00019472	cyp-35B1	11	9	0	148	170	223	0.184183	0.126591	0	2.17122	2.35264	3.13885	9.19186e-05	2.55424	up
WBGene00020909	W01A11.1	970	1049	1028	7804	7811	7538	18.965	17.9647	16.7391	133.124	125.134	123.048	0	2.56968	up
WBGene00019978	hacd-1	1219	1073	1433	22286	23633	24299	33.1293	25.5722	32.4392	528.853	526.796	551.901	0	3.87663	up
WBGene00001500	ftn-1	276	301	321	7482	9073	8811	11.6543	11.1346	11.2596	275.759	314.101	310.816	0	4.45186	up
WBGene00008040	ttr-5	756	890	853	4624	5336	5341	44.2272	45.5992	41.5203	236.092	255.887	260.983	5.3064e-171	2.25747	up
WBGene00019719	M01H9.3	2800	3061	3258	12474	12980	11105	66.9545	65.9519	66.899	264.897	256.65	226.175	1.58066e-149	1.65248	up
WBGene00001852	hil-1	99	99	161	1673	2032	1750	3.01741	2.6324	4.08676	44.7249	51.0382	44.7844	3.27186e-130	3.53878	up
WBGene00008341	ttr-44	2632	3145	3340	10132	10454	9772	112.315	117.621	118.704	377.425	365.8	348.411	5.86793e-129	1.38953	up
WBGene00016052	dod-3	194	208	306	2197	2694	2396	12.0013	11.2875	15.8029	118.906	136.946	124.141	1.76679e-127	2.99533	up
WBGene00008446	E01G4.3	3382	3416	4020	11279	12317	12813	144.94	128.515	143.593	410.27	421.159	456.96	5.42514e-107	1.40116	up
WBGene00019780	M60.4	3565	3774	3758	9969	12206	11360	158.269	146.623	139.139	385.72	444.306	421.157	3.88968e-69	1.24006	up
WBGene00077701	poml-3	536	455	475	2401	2423	2412	12.188	9.05685	8.99291	47.68	45.2017	45.8479	3.21308e-66	1.93252	up
WBGene00007440	C08E8.4	30	38	53	724	712	592	0.88568	0.978207	1.28552	18.6984	17.2924	14.6402	2.8937e-65	3.62389	up
WBGene00016716	acs-17	2024	2294	2603	6952	7483	6222	21.5755	21.6788	23.3982	65.0968	63.4301	53.7121	7.67432e-64	1.23016	up
WBGene00012404	Y6G8.2	239	141	238	1690	1960	1563	2.96123	1.53499	2.46413	18.3422	19.9835	16.2365	1.70911e-59	2.67579	up
WBGene00018602	F48D6.4	970	1185	1368	4415	4670	3385	50.4414	53.8784	59.2292	201.058	199.532	147.364	4.07821e-43	1.47325	up
WBGene00017336	ugt-41	150	140	205	790	857	912	2.31699	1.8945	2.63538	10.6791	10.8849	11.7949	4.62415e-36	1.99691	up
WBGene00009803	F47B8.2	472	371	490	1608	1763	1612	18.5183	12.7523	16.0185	55.1548	56.8076	52.9185	8.73004e-35	1.53559	up
WBGene00015044	cyp-34A9	120	152	122	686	639	676	2.05102	2.26855	1.70393	10.2714	8.99758	9.61504	4.47943e-30	1.96068	up
WBGene00007452	C08F11.3	20	38	31	367	300	299	0.516581	0.866234	0.662451	8.38453	6.43945	6.54154	3.95488e-27	2.95626	up
WBGene00019803	PDB1.1	766	630	817	1992	1985	2161	17.5776	12.6781	15.6123	39.8506	37.3168	41.5325	1.23673e-22	1.11302	up
WBGene00017303	F09F7.6	383	330	303	1166	1470	1062	28.6989	21.6988	18.9148	76.4109	90.4923	66.5836	1.04706e-20	1.47832	up
WBGene00018195	btb-16	243	123	168	845	948	790	6.99811	3.07976	4.02037	21.2228	22.3805	18.999	2.89486e-18	1.85163	up
WBGene00004798	sip-1	14	44	55	266	449	276	0.603662	1.63953	1.96462	10.0588	15.9556	9.97958	3.85263e-16	2.6266	up
WBGene00001397	fat-5	337	245	163	903	983	1134	8.48364	5.39187	3.40557	19.8282	20.2827	23.8313	2.91814e-05	1.50926	up
WBGene00009237	F28H7.3	4910	4947	5254	828	1019	851	132.09	116.624	117.715	19.4348	22.4548	19.1041	2.84571e-262	-2.82572	down
WBGene00022645	ZK6.11	2886	2721	3297	668	723	661	57.2949	47.3078	54.4915	12.8704	11.7514	12.146	4.92559e-165	-2.45366	down
WBGene00008132	gale-1	5005	5059	6224	2291	2114	2308	105.591	93.5479	109.294	42.1703	36.5633	40.6549	5.74115e-102	-1.61627	down
WBGene00010266	dct-18	9562	10913	11126	6481	6824	6692	350.134	350.201	339.309	207.074	204.808	204.661	2.70006e-89	-1.00499	down
WBGene00004020	pho-1	5806	6793	7310	3921	4195	4486	105.669	108.71	111.134	62.3273	62.2061	67.7226	6.08325e-55	-1.0005	down
WBGene00010123	F55G11.2	838	722	909	201	267	245	21.601	16.3046	19.5099	4.5063	5.63685	5.27349	6.19191e-44	-2.11394	down
WBGene00007867	C32H11.4	1572	1443	1593	675	612	698	37.1768	29.9031	31.3772	13.9271	11.8586	13.7869	1.39321e-43	-1.55425	down
WBGene00008584	irg-4	1608	1470	1785	947	951	833	38.9928	31.5407	36.127	20.0384	18.8954	16.8575	7.37882e-29	-1.17364	down
WBGene00008565	acox-1.2	435	592	699	167	288	199	5.9079	7.03996	7.9049	1.97592	3.19946	2.25707	2.22012e-18	-1.69937	down
WBGene00017594	F19C7.4	221	291	337	179	190	109	3.49772	4.04071	4.43712	2.46857	2.45543	1.43433	2.11982e-06	-1.12789	down
